# Supplementary material for: Interest without uptake: A mixed-methods analysis of methadone utilization in Kyrgyz prisons
Source: PubMed Central journal article supplement (PMC9595522; doi:10.1371/journal.pone.0276723), 2022-10-25
Supplement: pone.0276723.s001.pdf [file pone.0276723.s001.pdf]

## MATLINK All

PID 1265

Codebook ▾

## Data Dictionary Codebook

11/03/2020 10:53am

[^ Collapse all instruments](#)

| #                                                             | Variable / Field Name                               | Field Label<br><i>Field Note</i>                                                                                                                                                                                                                                                                                                                                                                                                                              | Field Attributes (Field Type, Validation, Choices, Calculations, etc.)                                                                              |   |           |   |          |   |            |
|---------------------------------------------------------------|-----------------------------------------------------|---------------------------------------------------------------------------------------------------------------------------------------------------------------------------------------------------------------------------------------------------------------------------------------------------------------------------------------------------------------------------------------------------------------------------------------------------------------|-----------------------------------------------------------------------------------------------------------------------------------------------------|---|-----------|---|----------|---|------------|
| Instrument: <b>Form 2</b> (form_2) <a href="#">^ Collapse</a> |                                                     |                                                                                                                                                                                                                                                                                                                                                                                                                                                               |                                                                                                                                                     |   |           |   |          |   |            |
| 1                                                             | redcap_id                                           | Redcap ID                                                                                                                                                                                                                                                                                                                                                                                                                                                     | text                                                                                                                                                |   |           |   |          |   |            |
| 2                                                             | language                                            | Language                                                                                                                                                                                                                                                                                                                                                                                                                                                      | radio<br><table border="1"> <tr><td>2</td><td>Russian</td></tr> <tr><td>3</td><td>Romanian</td></tr> </table>                                       | 2 | Russian   | 3 | Romanian |   |            |
| 2                                                             | Russian                                             |                                                                                                                                                                                                                                                                                                                                                                                                                                                               |                                                                                                                                                     |   |           |   |          |   |            |
| 3                                                             | Romanian                                            |                                                                                                                                                                                                                                                                                                                                                                                                                                                               |                                                                                                                                                     |   |           |   |          |   |            |
| 3                                                             | interviewer_id                                      | Interviewer ID<br>U: int_id_ru<br>M: int_id_ru int_id_om<br>K: int_id_ru                                                                                                                                                                                                                                                                                                                                                                                      | text (number, Min: 1, Max: 60)                                                                                                                      |   |           |   |          |   |            |
| 4                                                             | country                                             | Country<br>U: not present, coded from pid_ru<br>M: coded from pid_ru. pid_om<br>K: coded from pid_ru                                                                                                                                                                                                                                                                                                                                                          | radio<br><table border="1"> <tr><td>3</td><td>Ukraine</td></tr> <tr><td>1</td><td>Moldova</td></tr> <tr><td>2</td><td>Kyrgyzstan</td></tr> </table> | 3 | Ukraine   | 1 | Moldova  | 2 | Kyrgyzstan |
| 3                                                             | Ukraine                                             |                                                                                                                                                                                                                                                                                                                                                                                                                                                               |                                                                                                                                                     |   |           |   |          |   |            |
| 1                                                             | Moldova                                             |                                                                                                                                                                                                                                                                                                                                                                                                                                                               |                                                                                                                                                     |   |           |   |          |   |            |
| 2                                                             | Kyrgyzstan                                          |                                                                                                                                                                                                                                                                                                                                                                                                                                                               |                                                                                                                                                     |   |           |   |          |   |            |
| 5                                                             | screen_date                                         | Today's Date (Date of Screening)<br>U: scr_dt_ru<br>M: scr_dt_ru, scr_dt_om<br>K: scr_dt_ru                                                                                                                                                                                                                                                                                                                                                                   | text (date_mdy), Identifier                                                                                                                         |   |           |   |          |   |            |
| 6                                                             | probation_prison                                    | Probation or Prison<br>U: propriru<br>M: propriru, propriom<br>K: propriru                                                                                                                                                                                                                                                                                                                                                                                    | radio<br><table border="1"> <tr><td>1</td><td>Probation</td></tr> <tr><td>2</td><td>Prison</td></tr> </table>                                       | 1 | Probation | 2 | Prison   |   |            |
| 1                                                             | Probation                                           |                                                                                                                                                                                                                                                                                                                                                                                                                                                               |                                                                                                                                                     |   |           |   |          |   |            |
| 2                                                             | Prison                                              |                                                                                                                                                                                                                                                                                                                                                                                                                                                               |                                                                                                                                                     |   |           |   |          |   |            |
| 7                                                             | matlink_id                                          | MATLINK ID:<br><br>U: pid_ru<br>M: pid_ru, pid_om<br>K: pid_ru<br><br>(11 symbols):<br>Country code (Ukraine -3)<br>Facility number (- 01,02, 03, 04, 05, 06)<br>Gender (1 - male, 2 - female)<br>Study phase = 1<br>Last number of the day of birth<br>Last number of the month of birth<br>Last number of the year of birth<br>First letter of the client's first name<br>First letter of the client's last name<br>First letter of the mother's first name | text, Identifier                                                                                                                                    |   |           |   |          |   |            |
| 8                                                             | syrex<br>Show the field ONLY if:<br>[country] = '3' | Participant SyrEx code (8 symbols):<br>U: syr_ru<br><br>First letter of the client's name<br>First letter of the mother's name,<br>First letter of the father's name,<br>Day of birth (two numbers),<br>Two last numbers of year of birth<br>Client's gender: ? of F                                                                                                                                                                                          | text, Identifier                                                                                                                                    |   |           |   |          |   |            |

|    |                                                                  |                                                                                                                                                                                                                                    |                                                                                                           |   |     |   |    |
|----|------------------------------------------------------------------|------------------------------------------------------------------------------------------------------------------------------------------------------------------------------------------------------------------------------------|-----------------------------------------------------------------------------------------------------------|---|-----|---|----|
| 9  | kyr_id_code<br>Show the field ONLY if:<br>[country] = '2'        | Kyrgyzstan National ID Code:<br><br>First two letters of mother's name<br>First two letters of father's name<br>Gender(1-male, 2-female)<br>Last two digits of the birth year of the participant<br>U: N/A<br>M: N/A<br>K: idkyrru | text, Identifier                                                                                          |   |     |   |    |
| 10 | mat_syr                                                          | ?                                                                                                                                                                                                                                  | text, Identifier                                                                                          |   |     |   |    |
| 11 | rods_label                                                       | Section Header: <i>Part 1 RODS/screening</i><br><br>1. Have you used any of the following drugs in the past 12 months?                                                                                                             | descriptive                                                                                               |   |     |   |    |
| 12 | heroin                                                           | Section Header: <i>1. Have you used any of the following drugs in the past 12 months?</i><br>a. Heroin U: f2_1a_ru, M: f2_1a_ru, K: f2_1a_ru                                                                                       | radio (Matrix)<br><table border="1"><tr><td>1</td><td>Yes</td></tr><tr><td>0</td><td>No</td></tr></table> | 1 | Yes | 0 | No |
| 1  | Yes                                                              |                                                                                                                                                                                                                                    |                                                                                                           |   |     |   |    |
| 0  | No                                                               |                                                                                                                                                                                                                                    |                                                                                                           |   |     |   |    |
| 13 | illegal_methadone<br>Show the field ONLY if:<br>[country] <> '1' | b. Illegal Methadone U: f2_1b_ru M: N/A, K: f2_1c_ru                                                                                                                                                                               | radio (Matrix)<br><table border="1"><tr><td>1</td><td>Yes</td></tr><tr><td>0</td><td>No</td></tr></table> | 1 | Yes | 0 | No |
| 1  | Yes                                                              |                                                                                                                                                                                                                                    |                                                                                                           |   |     |   |    |
| 0  | No                                                               |                                                                                                                                                                                                                                    |                                                                                                           |   |     |   |    |
| 14 | illegal_bup<br>Show the field ONLY if:<br>[country] <> '2'       | c. Illegal Buprenorphine/Adnok U: f2_1c_ru M:f2_1b_ru, f2_1b_om, K: N/A                                                                                                                                                            | radio (Matrix)<br><table border="1"><tr><td>1</td><td>Yes</td></tr><tr><td>0</td><td>No</td></tr></table> | 1 | Yes | 0 | No |
| 1  | Yes                                                              |                                                                                                                                                                                                                                    |                                                                                                           |   |     |   |    |
| 0  | No                                                               |                                                                                                                                                                                                                                    |                                                                                                           |   |     |   |    |
| 15 | morphine                                                         | d. Morphine U: f2_1d_ru M:f2_1c_ru, f2_1c_om, K: f2_1d_ru                                                                                                                                                                          | radio (Matrix)<br><table border="1"><tr><td>1</td><td>Yes</td></tr><tr><td>0</td><td>No</td></tr></table> | 1 | Yes | 0 | No |
| 1  | Yes                                                              |                                                                                                                                                                                                                                    |                                                                                                           |   |     |   |    |
| 0  | No                                                               |                                                                                                                                                                                                                                    |                                                                                                           |   |     |   |    |
| 16 | poppy                                                            | e. Poppy extract U: f2_1e_ru M: f2_1d_ru, f2_1d_om, K: f2_1e_ru                                                                                                                                                                    | radio (Matrix)<br><table border="1"><tr><td>1</td><td>Yes</td></tr><tr><td>0</td><td>No</td></tr></table> | 1 | Yes | 0 | No |
| 1  | Yes                                                              |                                                                                                                                                                                                                                    |                                                                                                           |   |     |   |    |
| 0  | No                                                               |                                                                                                                                                                                                                                    |                                                                                                           |   |     |   |    |
| 17 | omnupon<br>Show the field ONLY if:<br>[country] <> '1'           | f. Omnupon U: f2_1f_ru, M: N/A, K: f2_1f_ru                                                                                                                                                                                        | radio (Matrix)<br><table border="1"><tr><td>1</td><td>Yes</td></tr><tr><td>0</td><td>No</td></tr></table> | 1 | Yes | 0 | No |
| 1  | Yes                                                              |                                                                                                                                                                                                                                    |                                                                                                           |   |     |   |    |
| 0  | No                                                               |                                                                                                                                                                                                                                    |                                                                                                           |   |     |   |    |
| 18 | codeine<br>Show the field ONLY if:<br>[country] <> '1'           | g. Codeine U: f2_1g_ru, M: N/A, K: f2_1g_ru                                                                                                                                                                                        | radio (Matrix)<br><table border="1"><tr><td>1</td><td>Yes</td></tr><tr><td>0</td><td>No</td></tr></table> | 1 | Yes | 0 | No |
| 1  | Yes                                                              |                                                                                                                                                                                                                                    |                                                                                                           |   |     |   |    |
| 0  | No                                                               |                                                                                                                                                                                                                                    |                                                                                                           |   |     |   |    |
| 19 | promedol<br>Show the field ONLY if:<br>[country] <> '1'          | h. Promedol U: f2_1h_ru, M: N/A, K:f2_1h_ru                                                                                                                                                                                        | radio (Matrix)<br><table border="1"><tr><td>1</td><td>Yes</td></tr><tr><td>0</td><td>No</td></tr></table> | 1 | Yes | 0 | No |
| 1  | Yes                                                              |                                                                                                                                                                                                                                    |                                                                                                           |   |     |   |    |
| 0  | No                                                               |                                                                                                                                                                                                                                    |                                                                                                           |   |     |   |    |
| 20 | fentanyl<br>Show the field ONLY if:<br>[country] <> '1'          | i. Fentanyl U: f2_1i_ru, M: N/A, K: f2_1i_ru                                                                                                                                                                                       | radio (Matrix)<br><table border="1"><tr><td>1</td><td>Yes</td></tr><tr><td>0</td><td>No</td></tr></table> | 1 | Yes | 0 | No |
| 1  | Yes                                                              |                                                                                                                                                                                                                                    |                                                                                                           |   |     |   |    |
| 0  | No                                                               |                                                                                                                                                                                                                                    |                                                                                                           |   |     |   |    |
| 21 | tramadol<br>Show the field ONLY if:<br>[country] <> '1'          | j. Tramadol U: f2_1j_ru, M: N/A, K: f2_1j_ru                                                                                                                                                                                       | radio (Matrix)<br><table border="1"><tr><td>1</td><td>Yes</td></tr><tr><td>0</td><td>No</td></tr></table> | 1 | Yes | 0 | No |
| 1  | Yes                                                              |                                                                                                                                                                                                                                    |                                                                                                           |   |     |   |    |
| 0  | No                                                               |                                                                                                                                                                                                                                    |                                                                                                           |   |     |   |    |
| 22 | other_opioids<br>Show the field ONLY if:<br>[country] <> '1'     | k. Other opioid analgesics U: f2_1k_ru, M: N/A, K: f2_1j_ru                                                                                                                                                                        | radio (Matrix)<br><table border="1"><tr><td>1</td><td>Yes</td></tr><tr><td>0</td><td>No</td></tr></table> | 1 | Yes | 0 | No |
| 1  | Yes                                                              |                                                                                                                                                                                                                                    |                                                                                                           |   |     |   |    |
| 0  | No                                                               |                                                                                                                                                                                                                                    |                                                                                                           |   |     |   |    |
| 23 | stimulant<br>Show the field ONLY if:<br>[country] = '1'          | Stimulant, ????? Jef U: Not present M; f2_1e_ru f21e_om                                                                                                                                                                            | radio (Matrix)<br><table border="1"><tr><td>1</td><td>Yes</td></tr><tr><td>0</td><td>No</td></tr></table> | 1 | Yes | 0 | No |
| 1  | Yes                                                              |                                                                                                                                                                                                                                    |                                                                                                           |   |     |   |    |
| 0  | No                                                               |                                                                                                                                                                                                                                    |                                                                                                           |   |     |   |    |

|    |                                                                   |                                                                                                                                                                                          |                                                                                                                                                                                                                                     |   |     |   |    |
|----|-------------------------------------------------------------------|------------------------------------------------------------------------------------------------------------------------------------------------------------------------------------------|-------------------------------------------------------------------------------------------------------------------------------------------------------------------------------------------------------------------------------------|---|-----|---|----|
| 24 | khimka<br>Show the field ONLY if:<br>[country] = '1'              | Made from marijuana, ?????, 'Khimka' U: not present, M: f2_1f_ru, f2_1f_om                                                                                                               | radio (Matrix)<br><table border="1"><tr><td>1</td><td>Yes</td></tr><tr><td>0</td><td>No</td></tr></table>                                                                                                                           | 1 | Yes | 0 | No |
| 1  | Yes                                                               |                                                                                                                                                                                          |                                                                                                                                                                                                                                     |   |     |   |    |
| 0  | No                                                                |                                                                                                                                                                                          |                                                                                                                                                                                                                                     |   |     |   |    |
| 25 | dirty_heroin<br>Show the field ONLY if:<br>[country] = '1'        | Dirty Heroin, ?????, ?irca U: not present, M: f2_1g_ru, f2_1f_om                                                                                                                         | radio (Matrix)<br><table border="1"><tr><td>1</td><td>Yes</td></tr><tr><td>0</td><td>No</td></tr></table>                                                                                                                           | 1 | Yes | 0 | No |
| 1  | Yes                                                               |                                                                                                                                                                                          |                                                                                                                                                                                                                                     |   |     |   |    |
| 0  | No                                                                |                                                                                                                                                                                          |                                                                                                                                                                                                                                     |   |     |   |    |
| 26 | other_drugs_moldova<br>Show the field ONLY if:<br>[country] = '1' | Other Moldova- Omnopon, Codeine, Promedol U: not present, M: f2_1h_ru, f2_1h_om                                                                                                          | radio (Matrix)<br><table border="1"><tr><td>1</td><td>Yes</td></tr><tr><td>0</td><td>No</td></tr></table>                                                                                                                           | 1 | Yes | 0 | No |
| 1  | Yes                                                               |                                                                                                                                                                                          |                                                                                                                                                                                                                                     |   |     |   |    |
| 0  | No                                                                |                                                                                                                                                                                          |                                                                                                                                                                                                                                     |   |     |   |    |
| 27 | drug_abuse_score                                                  | Part 1 drugs abuse score<br>U: pt1_score_ru<br>M: pt1_score_ru, pt1_score_om<br>K: pt1_score_ru<br><i>Count of drugs used in 1a-1k.</i>                                                  | calc<br>Calculation: sum([heroin], [illegal_methadone], [illegal_bup],[morphine], [poppy], [omnopon], [codeine], [promedol], [fentanyl], [tramadol], [other_opioids], [stimulant], [khimka], [dirty_heroin], [other_drugs_moldova]) |   |     |   |    |
| 28 | opioid_tolerance                                                  | 2. Did you ever have to take more opioids, to get the same effect as you did the first time?<br>U: f2_2_ru<br>M: f2_r_ru, f2_2_om<br>K: f2_2_ru                                          | yesno<br><table border="1"><tr><td>1</td><td>Yes</td></tr><tr><td>0</td><td>No</td></tr></table>                                                                                                                                    | 1 | Yes | 0 | No |
| 1  | Yes                                                               |                                                                                                                                                                                          |                                                                                                                                                                                                                                     |   |     |   |    |
| 0  | No                                                                |                                                                                                                                                                                          |                                                                                                                                                                                                                                     |   |     |   |    |
| 29 | op_skip_anxiety                                                   | 3. Did you ever feel anxious at the thought of skipping a dose of opioids?<br>U: f2_3_ru<br>M: f2_3_ru, f2_3_om<br>K: f2_3_ru                                                            | yesno<br><table border="1"><tr><td>1</td><td>Yes</td></tr><tr><td>0</td><td>No</td></tr></table>                                                                                                                                    | 1 | Yes | 0 | No |
| 1  | Yes                                                               |                                                                                                                                                                                          |                                                                                                                                                                                                                                     |   |     |   |    |
| 0  | No                                                                |                                                                                                                                                                                          |                                                                                                                                                                                                                                     |   |     |   |    |
| 30 | opioid_withdrawal                                                 | 4. Did you ever take opioids in the morning to avoid withdrawal, or did you ever experience withdrawal?<br>U: f2_4_ru<br>M: f2_4_ru, f2_4_om<br>K: f2_4_ru                               | yesno<br><table border="1"><tr><td>1</td><td>Yes</td></tr><tr><td>0</td><td>No</td></tr></table>                                                                                                                                    | 1 | Yes | 0 | No |
| 1  | Yes                                                               |                                                                                                                                                                                          |                                                                                                                                                                                                                                     |   |     |   |    |
| 0  | No                                                                |                                                                                                                                                                                          |                                                                                                                                                                                                                                     |   |     |   |    |
| 31 | worry_op_use                                                      | 5. Do you ever worry about using opioids?<br>U: f2_5_ru<br>M: f2_5_ru, f2_5_om<br>K: f2_5_ru                                                                                             | yesno<br><table border="1"><tr><td>1</td><td>Yes</td></tr><tr><td>0</td><td>No</td></tr></table>                                                                                                                                    | 1 | Yes | 0 | No |
| 1  | Yes                                                               |                                                                                                                                                                                          |                                                                                                                                                                                                                                     |   |     |   |    |
| 0  | No                                                                |                                                                                                                                                                                          |                                                                                                                                                                                                                                     |   |     |   |    |
| 32 | op_quit_difficulty                                                | 6. Was it difficult for you to stop using opioids?<br>U: f2_6_ru<br>M: f2_6_ru, f2_6_om<br>K: f2_6_ru                                                                                    | yesno<br><table border="1"><tr><td>1</td><td>Yes</td></tr><tr><td>0</td><td>No</td></tr></table>                                                                                                                                    | 1 | Yes | 0 | No |
| 1  | Yes                                                               |                                                                                                                                                                                          |                                                                                                                                                                                                                                     |   |     |   |    |
| 0  | No                                                                |                                                                                                                                                                                          |                                                                                                                                                                                                                                     |   |     |   |    |
| 33 | op_time                                                           | 7. Did you ever have to spend a lot of time/effort looking for opioids or on recovering after using?<br>U: f2_7_ru<br>M: f2_7_ru, f2_7_om<br>K: f2_7_ru                                  | yesno<br><table border="1"><tr><td>1</td><td>Yes</td></tr><tr><td>0</td><td>No</td></tr></table>                                                                                                                                    | 1 | Yes | 0 | No |
| 1  | Yes                                                               |                                                                                                                                                                                          |                                                                                                                                                                                                                                     |   |     |   |    |
| 0  | No                                                                |                                                                                                                                                                                          |                                                                                                                                                                                                                                     |   |     |   |    |
| 34 | op_time_wasted                                                    | 8. Did you ever lose time from important activities , such as visits to the doctor , family / social events or other due to opioids ?<br>U: f2_8_ru<br>M: f2_8_ru, f2_8_om<br>K: f2_8_ru | yesno<br><table border="1"><tr><td>1</td><td>Yes</td></tr><tr><td>0</td><td>No</td></tr></table>                                                                                                                                    | 1 | Yes | 0 | No |
| 1  | Yes                                                               |                                                                                                                                                                                          |                                                                                                                                                                                                                                     |   |     |   |    |
| 0  | No                                                                |                                                                                                                                                                                          |                                                                                                                                                                                                                                     |   |     |   |    |
| 35 | op_dependence_score                                               | Opioids Dependence Score<br>U: od_score_ru<br>M: od_score_ru, od_score_om<br>K: od_score_ru                                                                                              | calc<br>Calculation: sum([opioid_tolerance], [op_skip_anxiety], [opioid_withdrawal], [worry_op_use], [op_quit_difficulty], [op_time], [op_time_wasted])                                                                             |   |     |   |    |
| 36 | elig                                                              | Part 2: Eligibility criteria                                                                                                                                                             | descriptive                                                                                                                                                                                                                         |   |     |   |    |
| 37 | age18                                                             | 1. 18 and older<br>U: elig1_ru<br>M: elig1_ru, elig1_om<br>K: elig1_ru                                                                                                                   | yesno<br><table border="1"><tr><td>1</td><td>Yes</td></tr><tr><td>0</td><td>No</td></tr></table>                                                                                                                                    | 1 | Yes | 0 | No |
| 1  | Yes                                                               |                                                                                                                                                                                          |                                                                                                                                                                                                                                     |   |     |   |    |
| 0  | No                                                                |                                                                                                                                                                                          |                                                                                                                                                                                                                                     |   |     |   |    |

|    |                                                                 |                                                                                                                                                                            |                                                                                                              |   |       |   |         |
|----|-----------------------------------------------------------------|----------------------------------------------------------------------------------------------------------------------------------------------------------------------------|--------------------------------------------------------------------------------------------------------------|---|-------|---|---------|
| 38 | received_opioids<br>Show the field ONLY if:<br>[country] <> '2' | 2. Have you received methadone or burprenorphine in the last 15 days on a gratuitous basis?<br>U: elig2_ru<br>M: elig2_ru, elig2_om<br>K: N/A                              | radio<br><table border="1"><tr><td>0</td><td>Yes</td></tr><tr><td>1</td><td>No</td></tr></table>             | 0 | Yes   | 1 | No      |
| 0  | Yes                                                             |                                                                                                                                                                            |                                                                                                              |   |       |   |         |
| 1  | No                                                              |                                                                                                                                                                            |                                                                                                              |   |       |   |         |
| 39 | close_to_facility                                               | 3. Lives at most 30 km/60 min from the research facility<br>U: elig3_ru<br>M: elig3_ru, elig3_om<br>K: elig3_ru                                                            | radio<br><table border="1"><tr><td>1</td><td>Yes</td></tr><tr><td>0</td><td>No</td></tr></table>             | 1 | Yes   | 0 | No      |
| 1  | Yes                                                             |                                                                                                                                                                            |                                                                                                              |   |       |   |         |
| 0  | No                                                              |                                                                                                                                                                            |                                                                                                              |   |       |   |         |
| 40 | release_time<br>Show the field ONLY if:<br>[country] <> '3'     | Time of planned release:<br><br>for men (not less than 7 days to 180 days)<br>for women (at least 7 days to 270 days)<br>U: N/A<br>M: elig4_ru, elig4_om<br>K: elig4_ru    | yesno<br><table border="1"><tr><td>1</td><td>Yes</td></tr><tr><td>0</td><td>No</td></tr></table>             | 1 | Yes   | 0 | No      |
| 1  | Yes                                                             |                                                                                                                                                                            |                                                                                                              |   |       |   |         |
| 0  | No                                                              |                                                                                                                                                                            |                                                                                                              |   |       |   |         |
| 41 | travel_to_site<br>Show the field ONLY if:<br>[country] <> '3'   | 5. Ready to travel to a specific project site after release?<br>U: N/A<br>M: elig5_ru, elig5_om<br>K: elig5_ru                                                             | yesno<br><table border="1"><tr><td>1</td><td>Yes</td></tr><tr><td>0</td><td>No</td></tr></table>             | 1 | Yes   | 0 | No      |
| 1  | Yes                                                             |                                                                                                                                                                            |                                                                                                              |   |       |   |         |
| 0  | No                                                              |                                                                                                                                                                            |                                                                                                              |   |       |   |         |
| 42 | eligibility_score                                               | Eligibility Score<br>U: elig_score_ru eligible if = 3 (doesn't include release_time or travel_to_site)<br>M: elig_score_ru, elig_score_om<br><i>Count of criteria met.</i> | calc<br>Calculation: sum([age18], [received_opioids], [close_to_facility], [release_time], [travel_to_site]) |   |       |   |         |
| 43 | track_marks                                                     | Is there evidence of track marks or facility with injection practices?<br><br>U: track_ru                                                                                  | radio<br><table border="1"><tr><td>1</td><td>Yes</td></tr><tr><td>0</td><td>No</td></tr></table>             | 1 | Yes   | 0 | No      |
| 1  | Yes                                                             |                                                                                                                                                                            |                                                                                                              |   |       |   |         |
| 0  | No                                                              |                                                                                                                                                                            |                                                                                                              |   |       |   |         |
| 44 | index_partner                                                   | Is this an Index or Partner participant?                                                                                                                                   | radio<br><table border="1"><tr><td>1</td><td>Index</td></tr><tr><td>2</td><td>Partner</td></tr></table>      | 1 | Index | 2 | Partner |
| 1  | Index                                                           |                                                                                                                                                                            |                                                                                                              |   |       |   |         |
| 2  | Partner                                                         |                                                                                                                                                                            |                                                                                                              |   |       |   |         |
| 45 | index1<br>Show the field ONLY if:<br>[index_partner] = '1'      | Is there a person in your network who injects opioids and who may be interested in an opportunity to start OST?                                                            | yesno<br><table border="1"><tr><td>1</td><td>Yes</td></tr><tr><td>0</td><td>No</td></tr></table>             | 1 | Yes   | 0 | No      |
| 1  | Yes                                                             |                                                                                                                                                                            |                                                                                                              |   |       |   |         |
| 0  | No                                                              |                                                                                                                                                                            |                                                                                                              |   |       |   |         |
| 46 | index2<br>Show the field ONLY if:<br>[index_partner] = '1'      | How many such people do you know?                                                                                                                                          | text (number)                                                                                                |   |       |   |         |
| 47 | index3a<br>Show the field ONLY if:<br>[index_partner] = '1'     | Indicate the name/names of opioid dependent person(s)                                                                                                                      | text, Identifier                                                                                             |   |       |   |         |
| 48 | index3b<br>Show the field ONLY if:<br>[index_partner] = '1'     | Indicate the name/names of opioid dependent person(s)                                                                                                                      | text, Identifier                                                                                             |   |       |   |         |
| 49 | index3c<br>Show the field ONLY if:<br>[index_partner] = '1'     | Indicate the name/names of opioid dependent person(s)                                                                                                                      | text, Identifier                                                                                             |   |       |   |         |
| 50 | index3d<br>Show the field ONLY if:<br>[index_partner] = '1'     | Indicate the name/names of opioid dependent person(s)                                                                                                                      | text, Identifier                                                                                             |   |       |   |         |
| 51 | index3e<br>Show the field ONLY if:<br>[index_partner] = '1'     | Indicate the name/names of opioid dependent person(s)                                                                                                                      | text, Identifier                                                                                             |   |       |   |         |

|    |                                                             |                                         |                                                                                                                                                                                                                                                                                                                                              |   |        |   |                |   |        |   |        |   |         |   |                |   |        |   |       |
|----|-------------------------------------------------------------|-----------------------------------------|----------------------------------------------------------------------------------------------------------------------------------------------------------------------------------------------------------------------------------------------------------------------------------------------------------------------------------------------|---|--------|---|----------------|---|--------|---|--------|---|---------|---|----------------|---|--------|---|-------|
| 52 | index4a<br>Show the field ONLY if:<br>[index_partner] = '1' | What is your relationship to [index3a]? | radio<br><table border="1"> <tr><td>1</td><td>Spouse</td></tr> <tr><td>2</td><td>Sexual Partner</td></tr> <tr><td>3</td><td>Mother</td></tr> <tr><td>4</td><td>Father</td></tr> <tr><td>5</td><td>Sibling</td></tr> <tr><td>6</td><td>Other Relative</td></tr> <tr><td>7</td><td>Friend</td></tr> <tr><td>8</td><td>Other</td></tr> </table> | 1 | Spouse | 2 | Sexual Partner | 3 | Mother | 4 | Father | 5 | Sibling | 6 | Other Relative | 7 | Friend | 8 | Other |
| 1  | Spouse                                                      |                                         |                                                                                                                                                                                                                                                                                                                                              |   |        |   |                |   |        |   |        |   |         |   |                |   |        |   |       |
| 2  | Sexual Partner                                              |                                         |                                                                                                                                                                                                                                                                                                                                              |   |        |   |                |   |        |   |        |   |         |   |                |   |        |   |       |
| 3  | Mother                                                      |                                         |                                                                                                                                                                                                                                                                                                                                              |   |        |   |                |   |        |   |        |   |         |   |                |   |        |   |       |
| 4  | Father                                                      |                                         |                                                                                                                                                                                                                                                                                                                                              |   |        |   |                |   |        |   |        |   |         |   |                |   |        |   |       |
| 5  | Sibling                                                     |                                         |                                                                                                                                                                                                                                                                                                                                              |   |        |   |                |   |        |   |        |   |         |   |                |   |        |   |       |
| 6  | Other Relative                                              |                                         |                                                                                                                                                                                                                                                                                                                                              |   |        |   |                |   |        |   |        |   |         |   |                |   |        |   |       |
| 7  | Friend                                                      |                                         |                                                                                                                                                                                                                                                                                                                                              |   |        |   |                |   |        |   |        |   |         |   |                |   |        |   |       |
| 8  | Other                                                       |                                         |                                                                                                                                                                                                                                                                                                                                              |   |        |   |                |   |        |   |        |   |         |   |                |   |        |   |       |
| 53 | index4a_other<br>Show the field ONLY if:<br>[index4a] = '8' | Other:                                  | text                                                                                                                                                                                                                                                                                                                                         |   |        |   |                |   |        |   |        |   |         |   |                |   |        |   |       |
| 54 | index4b<br>Show the field ONLY if:<br>[index_partner] = '1' | What is your relationship to [index3b]? | radio<br><table border="1"> <tr><td>1</td><td>Spouse</td></tr> <tr><td>2</td><td>Sexual Partner</td></tr> <tr><td>3</td><td>Mother</td></tr> <tr><td>4</td><td>Father</td></tr> <tr><td>5</td><td>Sibling</td></tr> <tr><td>6</td><td>Other Relative</td></tr> <tr><td>7</td><td>Friend</td></tr> <tr><td>8</td><td>Other</td></tr> </table> | 1 | Spouse | 2 | Sexual Partner | 3 | Mother | 4 | Father | 5 | Sibling | 6 | Other Relative | 7 | Friend | 8 | Other |
| 1  | Spouse                                                      |                                         |                                                                                                                                                                                                                                                                                                                                              |   |        |   |                |   |        |   |        |   |         |   |                |   |        |   |       |
| 2  | Sexual Partner                                              |                                         |                                                                                                                                                                                                                                                                                                                                              |   |        |   |                |   |        |   |        |   |         |   |                |   |        |   |       |
| 3  | Mother                                                      |                                         |                                                                                                                                                                                                                                                                                                                                              |   |        |   |                |   |        |   |        |   |         |   |                |   |        |   |       |
| 4  | Father                                                      |                                         |                                                                                                                                                                                                                                                                                                                                              |   |        |   |                |   |        |   |        |   |         |   |                |   |        |   |       |
| 5  | Sibling                                                     |                                         |                                                                                                                                                                                                                                                                                                                                              |   |        |   |                |   |        |   |        |   |         |   |                |   |        |   |       |
| 6  | Other Relative                                              |                                         |                                                                                                                                                                                                                                                                                                                                              |   |        |   |                |   |        |   |        |   |         |   |                |   |        |   |       |
| 7  | Friend                                                      |                                         |                                                                                                                                                                                                                                                                                                                                              |   |        |   |                |   |        |   |        |   |         |   |                |   |        |   |       |
| 8  | Other                                                       |                                         |                                                                                                                                                                                                                                                                                                                                              |   |        |   |                |   |        |   |        |   |         |   |                |   |        |   |       |
| 55 | index4b_other<br>Show the field ONLY if:<br>[index4b] = '8' | Other:                                  | text                                                                                                                                                                                                                                                                                                                                         |   |        |   |                |   |        |   |        |   |         |   |                |   |        |   |       |
| 56 | index4c<br>Show the field ONLY if:<br>[index_partner] = '1' | What is your relationship to [index3c]? | radio<br><table border="1"> <tr><td>1</td><td>Spouse</td></tr> <tr><td>2</td><td>Sexual Partner</td></tr> <tr><td>3</td><td>Mother</td></tr> <tr><td>4</td><td>Father</td></tr> <tr><td>5</td><td>Sibling</td></tr> <tr><td>6</td><td>Other Relative</td></tr> <tr><td>7</td><td>Friend</td></tr> <tr><td>8</td><td>Other</td></tr> </table> | 1 | Spouse | 2 | Sexual Partner | 3 | Mother | 4 | Father | 5 | Sibling | 6 | Other Relative | 7 | Friend | 8 | Other |
| 1  | Spouse                                                      |                                         |                                                                                                                                                                                                                                                                                                                                              |   |        |   |                |   |        |   |        |   |         |   |                |   |        |   |       |
| 2  | Sexual Partner                                              |                                         |                                                                                                                                                                                                                                                                                                                                              |   |        |   |                |   |        |   |        |   |         |   |                |   |        |   |       |
| 3  | Mother                                                      |                                         |                                                                                                                                                                                                                                                                                                                                              |   |        |   |                |   |        |   |        |   |         |   |                |   |        |   |       |
| 4  | Father                                                      |                                         |                                                                                                                                                                                                                                                                                                                                              |   |        |   |                |   |        |   |        |   |         |   |                |   |        |   |       |
| 5  | Sibling                                                     |                                         |                                                                                                                                                                                                                                                                                                                                              |   |        |   |                |   |        |   |        |   |         |   |                |   |        |   |       |
| 6  | Other Relative                                              |                                         |                                                                                                                                                                                                                                                                                                                                              |   |        |   |                |   |        |   |        |   |         |   |                |   |        |   |       |
| 7  | Friend                                                      |                                         |                                                                                                                                                                                                                                                                                                                                              |   |        |   |                |   |        |   |        |   |         |   |                |   |        |   |       |
| 8  | Other                                                       |                                         |                                                                                                                                                                                                                                                                                                                                              |   |        |   |                |   |        |   |        |   |         |   |                |   |        |   |       |
| 57 | index4c_other<br>Show the field ONLY if:<br>[index4c] = '8' | Other:                                  | text                                                                                                                                                                                                                                                                                                                                         |   |        |   |                |   |        |   |        |   |         |   |                |   |        |   |       |
| 58 | index4d<br>Show the field ONLY if:<br>[index_partner] = '1' | What is your relationship to [index3d]? | radio<br><table border="1"> <tr><td>1</td><td>Spouse</td></tr> <tr><td>2</td><td>Sexual Partner</td></tr> <tr><td>3</td><td>Mother</td></tr> <tr><td>4</td><td>Father</td></tr> <tr><td>5</td><td>Sibling</td></tr> <tr><td>6</td><td>Other Relative</td></tr> <tr><td>7</td><td>Friend</td></tr> <tr><td>8</td><td>Other</td></tr> </table> | 1 | Spouse | 2 | Sexual Partner | 3 | Mother | 4 | Father | 5 | Sibling | 6 | Other Relative | 7 | Friend | 8 | Other |
| 1  | Spouse                                                      |                                         |                                                                                                                                                                                                                                                                                                                                              |   |        |   |                |   |        |   |        |   |         |   |                |   |        |   |       |
| 2  | Sexual Partner                                              |                                         |                                                                                                                                                                                                                                                                                                                                              |   |        |   |                |   |        |   |        |   |         |   |                |   |        |   |       |
| 3  | Mother                                                      |                                         |                                                                                                                                                                                                                                                                                                                                              |   |        |   |                |   |        |   |        |   |         |   |                |   |        |   |       |
| 4  | Father                                                      |                                         |                                                                                                                                                                                                                                                                                                                                              |   |        |   |                |   |        |   |        |   |         |   |                |   |        |   |       |
| 5  | Sibling                                                     |                                         |                                                                                                                                                                                                                                                                                                                                              |   |        |   |                |   |        |   |        |   |         |   |                |   |        |   |       |
| 6  | Other Relative                                              |                                         |                                                                                                                                                                                                                                                                                                                                              |   |        |   |                |   |        |   |        |   |         |   |                |   |        |   |       |
| 7  | Friend                                                      |                                         |                                                                                                                                                                                                                                                                                                                                              |   |        |   |                |   |        |   |        |   |         |   |                |   |        |   |       |
| 8  | Other                                                       |                                         |                                                                                                                                                                                                                                                                                                                                              |   |        |   |                |   |        |   |        |   |         |   |                |   |        |   |       |
| 59 | index4d_other<br>Show the field ONLY if:<br>[index4d] = '8' | Other:                                  | text                                                                                                                                                                                                                                                                                                                                         |   |        |   |                |   |        |   |        |   |         |   |                |   |        |   |       |

|                                                                                                          |                                                              |                                                                             |                                                                                                                                                                                                                                                                                                                                              |   |            |   |                |   |          |   |             |   |             |   |                |   |        |   |       |
|----------------------------------------------------------------------------------------------------------|--------------------------------------------------------------|-----------------------------------------------------------------------------|----------------------------------------------------------------------------------------------------------------------------------------------------------------------------------------------------------------------------------------------------------------------------------------------------------------------------------------------|---|------------|---|----------------|---|----------|---|-------------|---|-------------|---|----------------|---|--------|---|-------|
| 60                                                                                                       | index4e<br>Show the field ONLY if:<br>[index_partner] = '1'  | What is your relationship to [index3e]?                                     | radio<br><table border="1"> <tr><td>1</td><td>Spouse</td></tr> <tr><td>2</td><td>Sexual Partner</td></tr> <tr><td>3</td><td>Mother</td></tr> <tr><td>4</td><td>Father</td></tr> <tr><td>5</td><td>Sibling</td></tr> <tr><td>6</td><td>Other Relative</td></tr> <tr><td>7</td><td>Friend</td></tr> <tr><td>8</td><td>Other</td></tr> </table> | 1 | Spouse     | 2 | Sexual Partner | 3 | Mother   | 4 | Father      | 5 | Sibling     | 6 | Other Relative | 7 | Friend | 8 | Other |
| 1                                                                                                        | Spouse                                                       |                                                                             |                                                                                                                                                                                                                                                                                                                                              |   |            |   |                |   |          |   |             |   |             |   |                |   |        |   |       |
| 2                                                                                                        | Sexual Partner                                               |                                                                             |                                                                                                                                                                                                                                                                                                                                              |   |            |   |                |   |          |   |             |   |             |   |                |   |        |   |       |
| 3                                                                                                        | Mother                                                       |                                                                             |                                                                                                                                                                                                                                                                                                                                              |   |            |   |                |   |          |   |             |   |             |   |                |   |        |   |       |
| 4                                                                                                        | Father                                                       |                                                                             |                                                                                                                                                                                                                                                                                                                                              |   |            |   |                |   |          |   |             |   |             |   |                |   |        |   |       |
| 5                                                                                                        | Sibling                                                      |                                                                             |                                                                                                                                                                                                                                                                                                                                              |   |            |   |                |   |          |   |             |   |             |   |                |   |        |   |       |
| 6                                                                                                        | Other Relative                                               |                                                                             |                                                                                                                                                                                                                                                                                                                                              |   |            |   |                |   |          |   |             |   |             |   |                |   |        |   |       |
| 7                                                                                                        | Friend                                                       |                                                                             |                                                                                                                                                                                                                                                                                                                                              |   |            |   |                |   |          |   |             |   |             |   |                |   |        |   |       |
| 8                                                                                                        | Other                                                        |                                                                             |                                                                                                                                                                                                                                                                                                                                              |   |            |   |                |   |          |   |             |   |             |   |                |   |        |   |       |
| 61                                                                                                       | index4e_other<br>Show the field ONLY if:<br>[index4e] = '8'  | Other:                                                                      | text                                                                                                                                                                                                                                                                                                                                         |   |            |   |                |   |          |   |             |   |             |   |                |   |        |   |       |
| 62                                                                                                       | partner1<br>Show the field ONLY if:<br>[index_partner] = '2' | Please indicate the name of the person who told you about this study:       | text, Identifier                                                                                                                                                                                                                                                                                                                             |   |            |   |                |   |          |   |             |   |             |   |                |   |        |   |       |
| 63                                                                                                       | partner2<br>Show the field ONLY if:<br>[index_partner] = '2' | Indicate the date of birth of the person who told you about the study:      | text (date_ymd)                                                                                                                                                                                                                                                                                                                              |   |            |   |                |   |          |   |             |   |             |   |                |   |        |   |       |
| 64                                                                                                       | partner3<br>Show the field ONLY if:<br>[index_partner] = '2' | What is the relationship of the person who told you about the study to you? | radio<br><table border="1"> <tr><td>1</td><td>Spouse</td></tr> <tr><td>2</td><td>Sexual Partner</td></tr> <tr><td>3</td><td>Mother</td></tr> <tr><td>4</td><td>Father</td></tr> <tr><td>5</td><td>Sibling</td></tr> <tr><td>6</td><td>Other Relative</td></tr> <tr><td>7</td><td>Friend</td></tr> <tr><td>8</td><td>Other</td></tr> </table> | 1 | Spouse     | 2 | Sexual Partner | 3 | Mother   | 4 | Father      | 5 | Sibling     | 6 | Other Relative | 7 | Friend | 8 | Other |
| 1                                                                                                        | Spouse                                                       |                                                                             |                                                                                                                                                                                                                                                                                                                                              |   |            |   |                |   |          |   |             |   |             |   |                |   |        |   |       |
| 2                                                                                                        | Sexual Partner                                               |                                                                             |                                                                                                                                                                                                                                                                                                                                              |   |            |   |                |   |          |   |             |   |             |   |                |   |        |   |       |
| 3                                                                                                        | Mother                                                       |                                                                             |                                                                                                                                                                                                                                                                                                                                              |   |            |   |                |   |          |   |             |   |             |   |                |   |        |   |       |
| 4                                                                                                        | Father                                                       |                                                                             |                                                                                                                                                                                                                                                                                                                                              |   |            |   |                |   |          |   |             |   |             |   |                |   |        |   |       |
| 5                                                                                                        | Sibling                                                      |                                                                             |                                                                                                                                                                                                                                                                                                                                              |   |            |   |                |   |          |   |             |   |             |   |                |   |        |   |       |
| 6                                                                                                        | Other Relative                                               |                                                                             |                                                                                                                                                                                                                                                                                                                                              |   |            |   |                |   |          |   |             |   |             |   |                |   |        |   |       |
| 7                                                                                                        | Friend                                                       |                                                                             |                                                                                                                                                                                                                                                                                                                                              |   |            |   |                |   |          |   |             |   |             |   |                |   |        |   |       |
| 8                                                                                                        | Other                                                        |                                                                             |                                                                                                                                                                                                                                                                                                                                              |   |            |   |                |   |          |   |             |   |             |   |                |   |        |   |       |
| 65                                                                                                       | form_2_complete                                              | Section Header: <i>Form Status</i><br>Complete?                             | dropdown<br><table border="1"> <tr><td>0</td><td>Incomplete</td></tr> <tr><td>1</td><td>Unverified</td></tr> <tr><td>2</td><td>Complete</td></tr> </table>                                                                                                                                                                                   | 0 | Incomplete | 1 | Unverified     | 2 | Complete |   |             |   |             |   |                |   |        |   |       |
| 0                                                                                                        | Incomplete                                                   |                                                                             |                                                                                                                                                                                                                                                                                                                                              |   |            |   |                |   |          |   |             |   |             |   |                |   |        |   |       |
| 1                                                                                                        | Unverified                                                   |                                                                             |                                                                                                                                                                                                                                                                                                                                              |   |            |   |                |   |          |   |             |   |             |   |                |   |        |   |       |
| 2                                                                                                        | Complete                                                     |                                                                             |                                                                                                                                                                                                                                                                                                                                              |   |            |   |                |   |          |   |             |   |             |   |                |   |        |   |       |
| Instrument: <b>Event</b> (event) <span style="float: right;">^ Collapse</span>                           |                                                              |                                                                             |                                                                                                                                                                                                                                                                                                                                              |   |            |   |                |   |          |   |             |   |             |   |                |   |        |   |       |
| 66                                                                                                       | event                                                        | Which Event is this?                                                        | radio<br><table border="1"> <tr><td>0</td><td>Screening</td></tr> <tr><td>1</td><td>Day A</td></tr> <tr><td>2</td><td>Day B</td></tr> <tr><td>3</td><td>Follow-up 1</td></tr> <tr><td>4</td><td>Follow-up 2</td></tr> <tr><td>5</td><td>Follow-up 3</td></tr> </table>                                                                       | 0 | Screening  | 1 | Day A          | 2 | Day B    | 3 | Follow-up 1 | 4 | Follow-up 2 | 5 | Follow-up 3    |   |        |   |       |
| 0                                                                                                        | Screening                                                    |                                                                             |                                                                                                                                                                                                                                                                                                                                              |   |            |   |                |   |          |   |             |   |             |   |                |   |        |   |       |
| 1                                                                                                        | Day A                                                        |                                                                             |                                                                                                                                                                                                                                                                                                                                              |   |            |   |                |   |          |   |             |   |             |   |                |   |        |   |       |
| 2                                                                                                        | Day B                                                        |                                                                             |                                                                                                                                                                                                                                                                                                                                              |   |            |   |                |   |          |   |             |   |             |   |                |   |        |   |       |
| 3                                                                                                        | Follow-up 1                                                  |                                                                             |                                                                                                                                                                                                                                                                                                                                              |   |            |   |                |   |          |   |             |   |             |   |                |   |        |   |       |
| 4                                                                                                        | Follow-up 2                                                  |                                                                             |                                                                                                                                                                                                                                                                                                                                              |   |            |   |                |   |          |   |             |   |             |   |                |   |        |   |       |
| 5                                                                                                        | Follow-up 3                                                  |                                                                             |                                                                                                                                                                                                                                                                                                                                              |   |            |   |                |   |          |   |             |   |             |   |                |   |        |   |       |
| 67                                                                                                       | event_complete                                               | Section Header: <i>Form Status</i><br>Complete?                             | dropdown<br><table border="1"> <tr><td>0</td><td>Incomplete</td></tr> <tr><td>1</td><td>Unverified</td></tr> <tr><td>2</td><td>Complete</td></tr> </table>                                                                                                                                                                                   | 0 | Incomplete | 1 | Unverified     | 2 | Complete |   |             |   |             |   |                |   |        |   |       |
| 0                                                                                                        | Incomplete                                                   |                                                                             |                                                                                                                                                                                                                                                                                                                                              |   |            |   |                |   |          |   |             |   |             |   |                |   |        |   |       |
| 1                                                                                                        | Unverified                                                   |                                                                             |                                                                                                                                                                                                                                                                                                                                              |   |            |   |                |   |          |   |             |   |             |   |                |   |        |   |       |
| 2                                                                                                        | Complete                                                     |                                                                             |                                                                                                                                                                                                                                                                                                                                              |   |            |   |                |   |          |   |             |   |             |   |                |   |        |   |       |
| Instrument: <b>Consent(Kyrgyzstan)</b> (consentkyrgyzstan) <span style="float: right;">^ Collapse</span> |                                                              |                                                                             |                                                                                                                                                                                                                                                                                                                                              |   |            |   |                |   |          |   |             |   |             |   |                |   |        |   |       |
| 68                                                                                                       | consent<br>Show the field ONLY if:<br>[country] = '2'        | Did this participant give consent?<br>K: consent_ru                         | yesno<br><table border="1"> <tr><td>1</td><td>Yes</td></tr> <tr><td>0</td><td>No</td></tr> </table>                                                                                                                                                                                                                                          | 1 | Yes        | 0 | No             |   |          |   |             |   |             |   |                |   |        |   |       |
| 1                                                                                                        | Yes                                                          |                                                                             |                                                                                                                                                                                                                                                                                                                                              |   |            |   |                |   |          |   |             |   |             |   |                |   |        |   |       |
| 0                                                                                                        | No                                                           |                                                                             |                                                                                                                                                                                                                                                                                                                                              |   |            |   |                |   |          |   |             |   |             |   |                |   |        |   |       |

|                                                    |                                                                             |                                                                                                                                                |                                                                                                                                                                                                                                                                                                                                                                                           |   |            |   |            |   |          |   |   |   |   |   |   |   |   |   |   |   |   |   |   |    |    |
|----------------------------------------------------|-----------------------------------------------------------------------------|------------------------------------------------------------------------------------------------------------------------------------------------|-------------------------------------------------------------------------------------------------------------------------------------------------------------------------------------------------------------------------------------------------------------------------------------------------------------------------------------------------------------------------------------------|---|------------|---|------------|---|----------|---|---|---|---|---|---|---|---|---|---|---|---|---|---|----|----|
| 69                                                 | consentkyrgyzstan_complete                                                  | Section Header: <i>Form Status</i><br>Complete?                                                                                                | dropdown<br><table border="1"> <tr><td>0</td><td>Incomplete</td></tr> <tr><td>1</td><td>Unverified</td></tr> <tr><td>2</td><td>Complete</td></tr> </table>                                                                                                                                                                                                                                | 0 | Incomplete | 1 | Unverified | 2 | Complete |   |   |   |   |   |   |   |   |   |   |   |   |   |   |    |    |
| 0                                                  | Incomplete                                                                  |                                                                                                                                                |                                                                                                                                                                                                                                                                                                                                                                                           |   |            |   |            |   |          |   |   |   |   |   |   |   |   |   |   |   |   |   |   |    |    |
| 1                                                  | Unverified                                                                  |                                                                                                                                                |                                                                                                                                                                                                                                                                                                                                                                                           |   |            |   |            |   |          |   |   |   |   |   |   |   |   |   |   |   |   |   |   |    |    |
| 2                                                  | Complete                                                                    |                                                                                                                                                |                                                                                                                                                                                                                                                                                                                                                                                           |   |            |   |            |   |          |   |   |   |   |   |   |   |   |   |   |   |   |   |   |    |    |
| Instrument: <b>Form 10 And 11</b> (form_10_and_11) |                                                                             |                                                                                                                                                | <a href="#">^ Collapse</a>                                                                                                                                                                                                                                                                                                                                                                |   |            |   |            |   |          |   |   |   |   |   |   |   |   |   |   |   |   |   |   |    |    |
| 70                                                 | form1011_date                                                               | Interview date:<br>U, K: oat_intdt_ru<br>M: oat_intdt_ru, ot_intdt_om                                                                          | text (date_mdy)                                                                                                                                                                                                                                                                                                                                                                           |   |            |   |            |   |          |   |   |   |   |   |   |   |   |   |   |   |   |   |   |    |    |
| 71                                                 | current_on_oat                                                              | Is the participant currently on OAT?<br>U, K: on oat_ru<br>M: on oat_ru, on oat_om                                                             | radio<br><table border="1"> <tr><td>1</td><td>Yes</td></tr> <tr><td>0</td><td>No</td></tr> </table>                                                                                                                                                                                                                                                                                       | 1 | Yes        | 0 | No         |   |          |   |   |   |   |   |   |   |   |   |   |   |   |   |   |    |    |
| 1                                                  | Yes                                                                         |                                                                                                                                                |                                                                                                                                                                                                                                                                                                                                                                                           |   |            |   |            |   |          |   |   |   |   |   |   |   |   |   |   |   |   |   |   |    |    |
| 0                                                  | No                                                                          |                                                                                                                                                |                                                                                                                                                                                                                                                                                                                                                                                           |   |            |   |            |   |          |   |   |   |   |   |   |   |   |   |   |   |   |   |   |    |    |
| 72                                                 | satisfied_treat_length<br>Show the field ONLY if:<br>[current_on_oat] = '1' | 1. Are you satisfied with the length of your treatment? (0 = not satisfied, 10 = very satisfied) U, K: f101ru, M: f101ru, f101om               | radio (Matrix)<br><table border="1"> <tr><td>0</td><td>0</td></tr> <tr><td>1</td><td>1</td></tr> <tr><td>2</td><td>2</td></tr> <tr><td>3</td><td>3</td></tr> <tr><td>4</td><td>4</td></tr> <tr><td>5</td><td>5</td></tr> <tr><td>6</td><td>6</td></tr> <tr><td>7</td><td>7</td></tr> <tr><td>8</td><td>8</td></tr> <tr><td>9</td><td>9</td></tr> <tr><td>10</td><td>10</td></tr> </table> | 0 | 0          | 1 | 1          | 2 | 2        | 3 | 3 | 4 | 4 | 5 | 5 | 6 | 6 | 7 | 7 | 8 | 8 | 9 | 9 | 10 | 10 |
| 0                                                  | 0                                                                           |                                                                                                                                                |                                                                                                                                                                                                                                                                                                                                                                                           |   |            |   |            |   |          |   |   |   |   |   |   |   |   |   |   |   |   |   |   |    |    |
| 1                                                  | 1                                                                           |                                                                                                                                                |                                                                                                                                                                                                                                                                                                                                                                                           |   |            |   |            |   |          |   |   |   |   |   |   |   |   |   |   |   |   |   |   |    |    |
| 2                                                  | 2                                                                           |                                                                                                                                                |                                                                                                                                                                                                                                                                                                                                                                                           |   |            |   |            |   |          |   |   |   |   |   |   |   |   |   |   |   |   |   |   |    |    |
| 3                                                  | 3                                                                           |                                                                                                                                                |                                                                                                                                                                                                                                                                                                                                                                                           |   |            |   |            |   |          |   |   |   |   |   |   |   |   |   |   |   |   |   |   |    |    |
| 4                                                  | 4                                                                           |                                                                                                                                                |                                                                                                                                                                                                                                                                                                                                                                                           |   |            |   |            |   |          |   |   |   |   |   |   |   |   |   |   |   |   |   |   |    |    |
| 5                                                  | 5                                                                           |                                                                                                                                                |                                                                                                                                                                                                                                                                                                                                                                                           |   |            |   |            |   |          |   |   |   |   |   |   |   |   |   |   |   |   |   |   |    |    |
| 6                                                  | 6                                                                           |                                                                                                                                                |                                                                                                                                                                                                                                                                                                                                                                                           |   |            |   |            |   |          |   |   |   |   |   |   |   |   |   |   |   |   |   |   |    |    |
| 7                                                  | 7                                                                           |                                                                                                                                                |                                                                                                                                                                                                                                                                                                                                                                                           |   |            |   |            |   |          |   |   |   |   |   |   |   |   |   |   |   |   |   |   |    |    |
| 8                                                  | 8                                                                           |                                                                                                                                                |                                                                                                                                                                                                                                                                                                                                                                                           |   |            |   |            |   |          |   |   |   |   |   |   |   |   |   |   |   |   |   |   |    |    |
| 9                                                  | 9                                                                           |                                                                                                                                                |                                                                                                                                                                                                                                                                                                                                                                                           |   |            |   |            |   |          |   |   |   |   |   |   |   |   |   |   |   |   |   |   |    |    |
| 10                                                 | 10                                                                          |                                                                                                                                                |                                                                                                                                                                                                                                                                                                                                                                                           |   |            |   |            |   |          |   |   |   |   |   |   |   |   |   |   |   |   |   |   |    |    |
| 73                                                 | satisfied_dose<br>Show the field ONLY if:<br>[current_on_oat] = '1'         | 2. Are you satisfied with the dose you are receiving? (0 = not satisfied, 10 = very satisfied) U, K: f102ru, M: f102ru, f102om                 | radio (Matrix)<br><table border="1"> <tr><td>0</td><td>0</td></tr> <tr><td>1</td><td>1</td></tr> <tr><td>2</td><td>2</td></tr> <tr><td>3</td><td>3</td></tr> <tr><td>4</td><td>4</td></tr> <tr><td>5</td><td>5</td></tr> <tr><td>6</td><td>6</td></tr> <tr><td>7</td><td>7</td></tr> <tr><td>8</td><td>8</td></tr> <tr><td>9</td><td>9</td></tr> <tr><td>10</td><td>10</td></tr> </table> | 0 | 0          | 1 | 1          | 2 | 2        | 3 | 3 | 4 | 4 | 5 | 5 | 6 | 6 | 7 | 7 | 8 | 8 | 9 | 9 | 10 | 10 |
| 0                                                  | 0                                                                           |                                                                                                                                                |                                                                                                                                                                                                                                                                                                                                                                                           |   |            |   |            |   |          |   |   |   |   |   |   |   |   |   |   |   |   |   |   |    |    |
| 1                                                  | 1                                                                           |                                                                                                                                                |                                                                                                                                                                                                                                                                                                                                                                                           |   |            |   |            |   |          |   |   |   |   |   |   |   |   |   |   |   |   |   |   |    |    |
| 2                                                  | 2                                                                           |                                                                                                                                                |                                                                                                                                                                                                                                                                                                                                                                                           |   |            |   |            |   |          |   |   |   |   |   |   |   |   |   |   |   |   |   |   |    |    |
| 3                                                  | 3                                                                           |                                                                                                                                                |                                                                                                                                                                                                                                                                                                                                                                                           |   |            |   |            |   |          |   |   |   |   |   |   |   |   |   |   |   |   |   |   |    |    |
| 4                                                  | 4                                                                           |                                                                                                                                                |                                                                                                                                                                                                                                                                                                                                                                                           |   |            |   |            |   |          |   |   |   |   |   |   |   |   |   |   |   |   |   |   |    |    |
| 5                                                  | 5                                                                           |                                                                                                                                                |                                                                                                                                                                                                                                                                                                                                                                                           |   |            |   |            |   |          |   |   |   |   |   |   |   |   |   |   |   |   |   |   |    |    |
| 6                                                  | 6                                                                           |                                                                                                                                                |                                                                                                                                                                                                                                                                                                                                                                                           |   |            |   |            |   |          |   |   |   |   |   |   |   |   |   |   |   |   |   |   |    |    |
| 7                                                  | 7                                                                           |                                                                                                                                                |                                                                                                                                                                                                                                                                                                                                                                                           |   |            |   |            |   |          |   |   |   |   |   |   |   |   |   |   |   |   |   |   |    |    |
| 8                                                  | 8                                                                           |                                                                                                                                                |                                                                                                                                                                                                                                                                                                                                                                                           |   |            |   |            |   |          |   |   |   |   |   |   |   |   |   |   |   |   |   |   |    |    |
| 9                                                  | 9                                                                           |                                                                                                                                                |                                                                                                                                                                                                                                                                                                                                                                                           |   |            |   |            |   |          |   |   |   |   |   |   |   |   |   |   |   |   |   |   |    |    |
| 10                                                 | 10                                                                          |                                                                                                                                                |                                                                                                                                                                                                                                                                                                                                                                                           |   |            |   |            |   |          |   |   |   |   |   |   |   |   |   |   |   |   |   |   |    |    |
| 74                                                 | oat_side_effects<br>Show the field ONLY if:<br>[current_on_oat] = '1'       | 3. How often did you experience side effects from the dose you were taking? (0 = very seldom, 10 = very often) U, K: f103ru, M: f103ru, f103om | radio (Matrix)<br><table border="1"> <tr><td>0</td><td>0</td></tr> <tr><td>1</td><td>1</td></tr> <tr><td>2</td><td>2</td></tr> <tr><td>3</td><td>3</td></tr> <tr><td>4</td><td>4</td></tr> <tr><td>5</td><td>5</td></tr> <tr><td>6</td><td>6</td></tr> <tr><td>7</td><td>7</td></tr> <tr><td>8</td><td>8</td></tr> <tr><td>9</td><td>9</td></tr> <tr><td>10</td><td>10</td></tr> </table> | 0 | 0          | 1 | 1          | 2 | 2        | 3 | 3 | 4 | 4 | 5 | 5 | 6 | 6 | 7 | 7 | 8 | 8 | 9 | 9 | 10 | 10 |
| 0                                                  | 0                                                                           |                                                                                                                                                |                                                                                                                                                                                                                                                                                                                                                                                           |   |            |   |            |   |          |   |   |   |   |   |   |   |   |   |   |   |   |   |   |    |    |
| 1                                                  | 1                                                                           |                                                                                                                                                |                                                                                                                                                                                                                                                                                                                                                                                           |   |            |   |            |   |          |   |   |   |   |   |   |   |   |   |   |   |   |   |   |    |    |
| 2                                                  | 2                                                                           |                                                                                                                                                |                                                                                                                                                                                                                                                                                                                                                                                           |   |            |   |            |   |          |   |   |   |   |   |   |   |   |   |   |   |   |   |   |    |    |
| 3                                                  | 3                                                                           |                                                                                                                                                |                                                                                                                                                                                                                                                                                                                                                                                           |   |            |   |            |   |          |   |   |   |   |   |   |   |   |   |   |   |   |   |   |    |    |
| 4                                                  | 4                                                                           |                                                                                                                                                |                                                                                                                                                                                                                                                                                                                                                                                           |   |            |   |            |   |          |   |   |   |   |   |   |   |   |   |   |   |   |   |   |    |    |
| 5                                                  | 5                                                                           |                                                                                                                                                |                                                                                                                                                                                                                                                                                                                                                                                           |   |            |   |            |   |          |   |   |   |   |   |   |   |   |   |   |   |   |   |   |    |    |
| 6                                                  | 6                                                                           |                                                                                                                                                |                                                                                                                                                                                                                                                                                                                                                                                           |   |            |   |            |   |          |   |   |   |   |   |   |   |   |   |   |   |   |   |   |    |    |
| 7                                                  | 7                                                                           |                                                                                                                                                |                                                                                                                                                                                                                                                                                                                                                                                           |   |            |   |            |   |          |   |   |   |   |   |   |   |   |   |   |   |   |   |   |    |    |
| 8                                                  | 8                                                                           |                                                                                                                                                |                                                                                                                                                                                                                                                                                                                                                                                           |   |            |   |            |   |          |   |   |   |   |   |   |   |   |   |   |   |   |   |   |    |    |
| 9                                                  | 9                                                                           |                                                                                                                                                |                                                                                                                                                                                                                                                                                                                                                                                           |   |            |   |            |   |          |   |   |   |   |   |   |   |   |   |   |   |   |   |   |    |    |
| 10                                                 | 10                                                                          |                                                                                                                                                |                                                                                                                                                                                                                                                                                                                                                                                           |   |            |   |            |   |          |   |   |   |   |   |   |   |   |   |   |   |   |   |   |    |    |

|    |                                                                                        |                                                                                                                                                                                                 |                                                                                                                                                                                                                                                                                                                                                                                               |   |   |   |   |   |   |   |   |   |   |   |   |   |   |   |   |   |   |   |   |    |    |
|----|----------------------------------------------------------------------------------------|-------------------------------------------------------------------------------------------------------------------------------------------------------------------------------------------------|-----------------------------------------------------------------------------------------------------------------------------------------------------------------------------------------------------------------------------------------------------------------------------------------------------------------------------------------------------------------------------------------------|---|---|---|---|---|---|---|---|---|---|---|---|---|---|---|---|---|---|---|---|----|----|
| 75 | <p>oat_effectiveness</p> <p>Show the field ONLY if:<br/>[current_on_oat] = '1'</p>     | <p>4. How effectively does taking methadone or buprenorphine help you reduce other opioid use? (0 = not effective at all, 10 = extremely effective) U, K:f104ru M: f104ru, f104om</p>           | <p>radio (Matrix)</p> <table border="1"> <tr><td>0</td><td>0</td></tr> <tr><td>1</td><td>1</td></tr> <tr><td>2</td><td>2</td></tr> <tr><td>3</td><td>3</td></tr> <tr><td>4</td><td>4</td></tr> <tr><td>5</td><td>5</td></tr> <tr><td>6</td><td>6</td></tr> <tr><td>7</td><td>7</td></tr> <tr><td>8</td><td>8</td></tr> <tr><td>9</td><td>9</td></tr> <tr><td>10</td><td>10</td></tr> </table> | 0 | 0 | 1 | 1 | 2 | 2 | 3 | 3 | 4 | 4 | 5 | 5 | 6 | 6 | 7 | 7 | 8 | 8 | 9 | 9 | 10 | 10 |
| 0  | 0                                                                                      |                                                                                                                                                                                                 |                                                                                                                                                                                                                                                                                                                                                                                               |   |   |   |   |   |   |   |   |   |   |   |   |   |   |   |   |   |   |   |   |    |    |
| 1  | 1                                                                                      |                                                                                                                                                                                                 |                                                                                                                                                                                                                                                                                                                                                                                               |   |   |   |   |   |   |   |   |   |   |   |   |   |   |   |   |   |   |   |   |    |    |
| 2  | 2                                                                                      |                                                                                                                                                                                                 |                                                                                                                                                                                                                                                                                                                                                                                               |   |   |   |   |   |   |   |   |   |   |   |   |   |   |   |   |   |   |   |   |    |    |
| 3  | 3                                                                                      |                                                                                                                                                                                                 |                                                                                                                                                                                                                                                                                                                                                                                               |   |   |   |   |   |   |   |   |   |   |   |   |   |   |   |   |   |   |   |   |    |    |
| 4  | 4                                                                                      |                                                                                                                                                                                                 |                                                                                                                                                                                                                                                                                                                                                                                               |   |   |   |   |   |   |   |   |   |   |   |   |   |   |   |   |   |   |   |   |    |    |
| 5  | 5                                                                                      |                                                                                                                                                                                                 |                                                                                                                                                                                                                                                                                                                                                                                               |   |   |   |   |   |   |   |   |   |   |   |   |   |   |   |   |   |   |   |   |    |    |
| 6  | 6                                                                                      |                                                                                                                                                                                                 |                                                                                                                                                                                                                                                                                                                                                                                               |   |   |   |   |   |   |   |   |   |   |   |   |   |   |   |   |   |   |   |   |    |    |
| 7  | 7                                                                                      |                                                                                                                                                                                                 |                                                                                                                                                                                                                                                                                                                                                                                               |   |   |   |   |   |   |   |   |   |   |   |   |   |   |   |   |   |   |   |   |    |    |
| 8  | 8                                                                                      |                                                                                                                                                                                                 |                                                                                                                                                                                                                                                                                                                                                                                               |   |   |   |   |   |   |   |   |   |   |   |   |   |   |   |   |   |   |   |   |    |    |
| 9  | 9                                                                                      |                                                                                                                                                                                                 |                                                                                                                                                                                                                                                                                                                                                                                               |   |   |   |   |   |   |   |   |   |   |   |   |   |   |   |   |   |   |   |   |    |    |
| 10 | 10                                                                                     |                                                                                                                                                                                                 |                                                                                                                                                                                                                                                                                                                                                                                               |   |   |   |   |   |   |   |   |   |   |   |   |   |   |   |   |   |   |   |   |    |    |
| 76 | <p>oat_qol_increase</p> <p>Show the field ONLY if:<br/>[current_on_oat] = '1'</p>      | <p>5. How much does treatment with methadone/buprenorphine increase your quality of life? (0 = doesn't help at all, 10 = helps a lot) U, K: f105ru, M: f105ru, f105om</p>                       | <p>radio (Matrix)</p> <table border="1"> <tr><td>0</td><td>0</td></tr> <tr><td>1</td><td>1</td></tr> <tr><td>2</td><td>2</td></tr> <tr><td>3</td><td>3</td></tr> <tr><td>4</td><td>4</td></tr> <tr><td>5</td><td>5</td></tr> <tr><td>6</td><td>6</td></tr> <tr><td>7</td><td>7</td></tr> <tr><td>8</td><td>8</td></tr> <tr><td>9</td><td>9</td></tr> <tr><td>10</td><td>10</td></tr> </table> | 0 | 0 | 1 | 1 | 2 | 2 | 3 | 3 | 4 | 4 | 5 | 5 | 6 | 6 | 7 | 7 | 8 | 8 | 9 | 9 | 10 | 10 |
| 0  | 0                                                                                      |                                                                                                                                                                                                 |                                                                                                                                                                                                                                                                                                                                                                                               |   |   |   |   |   |   |   |   |   |   |   |   |   |   |   |   |   |   |   |   |    |    |
| 1  | 1                                                                                      |                                                                                                                                                                                                 |                                                                                                                                                                                                                                                                                                                                                                                               |   |   |   |   |   |   |   |   |   |   |   |   |   |   |   |   |   |   |   |   |    |    |
| 2  | 2                                                                                      |                                                                                                                                                                                                 |                                                                                                                                                                                                                                                                                                                                                                                               |   |   |   |   |   |   |   |   |   |   |   |   |   |   |   |   |   |   |   |   |    |    |
| 3  | 3                                                                                      |                                                                                                                                                                                                 |                                                                                                                                                                                                                                                                                                                                                                                               |   |   |   |   |   |   |   |   |   |   |   |   |   |   |   |   |   |   |   |   |    |    |
| 4  | 4                                                                                      |                                                                                                                                                                                                 |                                                                                                                                                                                                                                                                                                                                                                                               |   |   |   |   |   |   |   |   |   |   |   |   |   |   |   |   |   |   |   |   |    |    |
| 5  | 5                                                                                      |                                                                                                                                                                                                 |                                                                                                                                                                                                                                                                                                                                                                                               |   |   |   |   |   |   |   |   |   |   |   |   |   |   |   |   |   |   |   |   |    |    |
| 6  | 6                                                                                      |                                                                                                                                                                                                 |                                                                                                                                                                                                                                                                                                                                                                                               |   |   |   |   |   |   |   |   |   |   |   |   |   |   |   |   |   |   |   |   |    |    |
| 7  | 7                                                                                      |                                                                                                                                                                                                 |                                                                                                                                                                                                                                                                                                                                                                                               |   |   |   |   |   |   |   |   |   |   |   |   |   |   |   |   |   |   |   |   |    |    |
| 8  | 8                                                                                      |                                                                                                                                                                                                 |                                                                                                                                                                                                                                                                                                                                                                                               |   |   |   |   |   |   |   |   |   |   |   |   |   |   |   |   |   |   |   |   |    |    |
| 9  | 9                                                                                      |                                                                                                                                                                                                 |                                                                                                                                                                                                                                                                                                                                                                                               |   |   |   |   |   |   |   |   |   |   |   |   |   |   |   |   |   |   |   |   |    |    |
| 10 | 10                                                                                     |                                                                                                                                                                                                 |                                                                                                                                                                                                                                                                                                                                                                                               |   |   |   |   |   |   |   |   |   |   |   |   |   |   |   |   |   |   |   |   |    |    |
| 77 | <p>oat_relations_improve</p> <p>Show the field ONLY if:<br/>[current_on_oat] = '1'</p> | <p>6. How much does treatment with methadone or buprenorphine affect your relationships with friends and family? (0 = doesn't help at all, 10 = helps a lot) U, K:f106ru, M: f106ru, f106om</p> | <p>radio (Matrix)</p> <table border="1"> <tr><td>0</td><td>0</td></tr> <tr><td>1</td><td>1</td></tr> <tr><td>2</td><td>2</td></tr> <tr><td>3</td><td>3</td></tr> <tr><td>4</td><td>4</td></tr> <tr><td>5</td><td>5</td></tr> <tr><td>6</td><td>6</td></tr> <tr><td>7</td><td>7</td></tr> <tr><td>8</td><td>8</td></tr> <tr><td>9</td><td>9</td></tr> <tr><td>10</td><td>10</td></tr> </table> | 0 | 0 | 1 | 1 | 2 | 2 | 3 | 3 | 4 | 4 | 5 | 5 | 6 | 6 | 7 | 7 | 8 | 8 | 9 | 9 | 10 | 10 |
| 0  | 0                                                                                      |                                                                                                                                                                                                 |                                                                                                                                                                                                                                                                                                                                                                                               |   |   |   |   |   |   |   |   |   |   |   |   |   |   |   |   |   |   |   |   |    |    |
| 1  | 1                                                                                      |                                                                                                                                                                                                 |                                                                                                                                                                                                                                                                                                                                                                                               |   |   |   |   |   |   |   |   |   |   |   |   |   |   |   |   |   |   |   |   |    |    |
| 2  | 2                                                                                      |                                                                                                                                                                                                 |                                                                                                                                                                                                                                                                                                                                                                                               |   |   |   |   |   |   |   |   |   |   |   |   |   |   |   |   |   |   |   |   |    |    |
| 3  | 3                                                                                      |                                                                                                                                                                                                 |                                                                                                                                                                                                                                                                                                                                                                                               |   |   |   |   |   |   |   |   |   |   |   |   |   |   |   |   |   |   |   |   |    |    |
| 4  | 4                                                                                      |                                                                                                                                                                                                 |                                                                                                                                                                                                                                                                                                                                                                                               |   |   |   |   |   |   |   |   |   |   |   |   |   |   |   |   |   |   |   |   |    |    |
| 5  | 5                                                                                      |                                                                                                                                                                                                 |                                                                                                                                                                                                                                                                                                                                                                                               |   |   |   |   |   |   |   |   |   |   |   |   |   |   |   |   |   |   |   |   |    |    |
| 6  | 6                                                                                      |                                                                                                                                                                                                 |                                                                                                                                                                                                                                                                                                                                                                                               |   |   |   |   |   |   |   |   |   |   |   |   |   |   |   |   |   |   |   |   |    |    |
| 7  | 7                                                                                      |                                                                                                                                                                                                 |                                                                                                                                                                                                                                                                                                                                                                                               |   |   |   |   |   |   |   |   |   |   |   |   |   |   |   |   |   |   |   |   |    |    |
| 8  | 8                                                                                      |                                                                                                                                                                                                 |                                                                                                                                                                                                                                                                                                                                                                                               |   |   |   |   |   |   |   |   |   |   |   |   |   |   |   |   |   |   |   |   |    |    |
| 9  | 9                                                                                      |                                                                                                                                                                                                 |                                                                                                                                                                                                                                                                                                                                                                                               |   |   |   |   |   |   |   |   |   |   |   |   |   |   |   |   |   |   |   |   |    |    |
| 10 | 10                                                                                     |                                                                                                                                                                                                 |                                                                                                                                                                                                                                                                                                                                                                                               |   |   |   |   |   |   |   |   |   |   |   |   |   |   |   |   |   |   |   |   |    |    |
| 78 | <p>interest_in_oat</p> <p>Show the field ONLY if:<br/>[current_on_oat] = '0'</p>       | <p>1. How interested are you in receiving OAT? (0 = not interested at all, 10 = very interested) U, K:f11_1_ru, M: f11_1_ru, f11_1_om</p>                                                       | <p>radio (Matrix)</p> <table border="1"> <tr><td>0</td><td>0</td></tr> <tr><td>1</td><td>1</td></tr> <tr><td>2</td><td>2</td></tr> <tr><td>3</td><td>3</td></tr> <tr><td>4</td><td>4</td></tr> <tr><td>5</td><td>5</td></tr> <tr><td>6</td><td>6</td></tr> <tr><td>7</td><td>7</td></tr> <tr><td>8</td><td>8</td></tr> <tr><td>9</td><td>9</td></tr> <tr><td>10</td><td>10</td></tr> </table> | 0 | 0 | 1 | 1 | 2 | 2 | 3 | 3 | 4 | 4 | 5 | 5 | 6 | 6 | 7 | 7 | 8 | 8 | 9 | 9 | 10 | 10 |
| 0  | 0                                                                                      |                                                                                                                                                                                                 |                                                                                                                                                                                                                                                                                                                                                                                               |   |   |   |   |   |   |   |   |   |   |   |   |   |   |   |   |   |   |   |   |    |    |
| 1  | 1                                                                                      |                                                                                                                                                                                                 |                                                                                                                                                                                                                                                                                                                                                                                               |   |   |   |   |   |   |   |   |   |   |   |   |   |   |   |   |   |   |   |   |    |    |
| 2  | 2                                                                                      |                                                                                                                                                                                                 |                                                                                                                                                                                                                                                                                                                                                                                               |   |   |   |   |   |   |   |   |   |   |   |   |   |   |   |   |   |   |   |   |    |    |
| 3  | 3                                                                                      |                                                                                                                                                                                                 |                                                                                                                                                                                                                                                                                                                                                                                               |   |   |   |   |   |   |   |   |   |   |   |   |   |   |   |   |   |   |   |   |    |    |
| 4  | 4                                                                                      |                                                                                                                                                                                                 |                                                                                                                                                                                                                                                                                                                                                                                               |   |   |   |   |   |   |   |   |   |   |   |   |   |   |   |   |   |   |   |   |    |    |
| 5  | 5                                                                                      |                                                                                                                                                                                                 |                                                                                                                                                                                                                                                                                                                                                                                               |   |   |   |   |   |   |   |   |   |   |   |   |   |   |   |   |   |   |   |   |    |    |
| 6  | 6                                                                                      |                                                                                                                                                                                                 |                                                                                                                                                                                                                                                                                                                                                                                               |   |   |   |   |   |   |   |   |   |   |   |   |   |   |   |   |   |   |   |   |    |    |
| 7  | 7                                                                                      |                                                                                                                                                                                                 |                                                                                                                                                                                                                                                                                                                                                                                               |   |   |   |   |   |   |   |   |   |   |   |   |   |   |   |   |   |   |   |   |    |    |
| 8  | 8                                                                                      |                                                                                                                                                                                                 |                                                                                                                                                                                                                                                                                                                                                                                               |   |   |   |   |   |   |   |   |   |   |   |   |   |   |   |   |   |   |   |   |    |    |
| 9  | 9                                                                                      |                                                                                                                                                                                                 |                                                                                                                                                                                                                                                                                                                                                                                               |   |   |   |   |   |   |   |   |   |   |   |   |   |   |   |   |   |   |   |   |    |    |
| 10 | 10                                                                                     |                                                                                                                                                                                                 |                                                                                                                                                                                                                                                                                                                                                                                               |   |   |   |   |   |   |   |   |   |   |   |   |   |   |   |   |   |   |   |   |    |    |



|    |                                                                                         |                                                                                                                                                                                                                                                                                                                                                                                                                                                                                 |                                                                                                                                                                                                                                                                                                                                                                                               |   |                           |   |   |   |   |   |   |   |                    |   |   |   |   |   |   |   |   |   |   |    |    |
|----|-----------------------------------------------------------------------------------------|---------------------------------------------------------------------------------------------------------------------------------------------------------------------------------------------------------------------------------------------------------------------------------------------------------------------------------------------------------------------------------------------------------------------------------------------------------------------------------|-----------------------------------------------------------------------------------------------------------------------------------------------------------------------------------------------------------------------------------------------------------------------------------------------------------------------------------------------------------------------------------------------|---|---------------------------|---|---|---|---|---|---|---|--------------------|---|---|---|---|---|---|---|---|---|---|----|----|
| 79 | <p>difficulty_start_oat</p> <p>Show the field ONLY if:<br/>[current_on_oat] = '0'</p>   | <p>2. You said you were interested in receiving OAT. How do difficult do you think it would be for you to start treatment? (0 = not difficult at all, 10 = very difficult) U, K: f11_2_ru, M: f11_2_ru, f11_2_om</p>                                                                                                                                                                                                                                                            | <p>radio (Matrix)</p> <table border="1"> <tr><td>0</td><td>0</td></tr> <tr><td>1</td><td>1</td></tr> <tr><td>2</td><td>2</td></tr> <tr><td>3</td><td>3</td></tr> <tr><td>4</td><td>4</td></tr> <tr><td>5</td><td>5</td></tr> <tr><td>6</td><td>6</td></tr> <tr><td>7</td><td>7</td></tr> <tr><td>8</td><td>8</td></tr> <tr><td>9</td><td>9</td></tr> <tr><td>10</td><td>10</td></tr> </table> | 0 | 0                         | 1 | 1 | 2 | 2 | 3 | 3 | 4 | 4                  | 5 | 5 | 6 | 6 | 7 | 7 | 8 | 8 | 9 | 9 | 10 | 10 |
| 0  | 0                                                                                       |                                                                                                                                                                                                                                                                                                                                                                                                                                                                                 |                                                                                                                                                                                                                                                                                                                                                                                               |   |                           |   |   |   |   |   |   |   |                    |   |   |   |   |   |   |   |   |   |   |    |    |
| 1  | 1                                                                                       |                                                                                                                                                                                                                                                                                                                                                                                                                                                                                 |                                                                                                                                                                                                                                                                                                                                                                                               |   |                           |   |   |   |   |   |   |   |                    |   |   |   |   |   |   |   |   |   |   |    |    |
| 2  | 2                                                                                       |                                                                                                                                                                                                                                                                                                                                                                                                                                                                                 |                                                                                                                                                                                                                                                                                                                                                                                               |   |                           |   |   |   |   |   |   |   |                    |   |   |   |   |   |   |   |   |   |   |    |    |
| 3  | 3                                                                                       |                                                                                                                                                                                                                                                                                                                                                                                                                                                                                 |                                                                                                                                                                                                                                                                                                                                                                                               |   |                           |   |   |   |   |   |   |   |                    |   |   |   |   |   |   |   |   |   |   |    |    |
| 4  | 4                                                                                       |                                                                                                                                                                                                                                                                                                                                                                                                                                                                                 |                                                                                                                                                                                                                                                                                                                                                                                               |   |                           |   |   |   |   |   |   |   |                    |   |   |   |   |   |   |   |   |   |   |    |    |
| 5  | 5                                                                                       |                                                                                                                                                                                                                                                                                                                                                                                                                                                                                 |                                                                                                                                                                                                                                                                                                                                                                                               |   |                           |   |   |   |   |   |   |   |                    |   |   |   |   |   |   |   |   |   |   |    |    |
| 6  | 6                                                                                       |                                                                                                                                                                                                                                                                                                                                                                                                                                                                                 |                                                                                                                                                                                                                                                                                                                                                                                               |   |                           |   |   |   |   |   |   |   |                    |   |   |   |   |   |   |   |   |   |   |    |    |
| 7  | 7                                                                                       |                                                                                                                                                                                                                                                                                                                                                                                                                                                                                 |                                                                                                                                                                                                                                                                                                                                                                                               |   |                           |   |   |   |   |   |   |   |                    |   |   |   |   |   |   |   |   |   |   |    |    |
| 8  | 8                                                                                       |                                                                                                                                                                                                                                                                                                                                                                                                                                                                                 |                                                                                                                                                                                                                                                                                                                                                                                               |   |                           |   |   |   |   |   |   |   |                    |   |   |   |   |   |   |   |   |   |   |    |    |
| 9  | 9                                                                                       |                                                                                                                                                                                                                                                                                                                                                                                                                                                                                 |                                                                                                                                                                                                                                                                                                                                                                                               |   |                           |   |   |   |   |   |   |   |                    |   |   |   |   |   |   |   |   |   |   |    |    |
| 10 | 10                                                                                      |                                                                                                                                                                                                                                                                                                                                                                                                                                                                                 |                                                                                                                                                                                                                                                                                                                                                                                               |   |                           |   |   |   |   |   |   |   |                    |   |   |   |   |   |   |   |   |   |   |    |    |
| 80 | <p>importance_receive_oat</p> <p>Show the field ONLY if:<br/>[current_on_oat] = '0'</p> | <p>3. How important is it for you to receive OAT? (0 = not important at all, 10 = very important) U, K:f11_3_ru, M: f11_3_ru, f11_3_om</p>                                                                                                                                                                                                                                                                                                                                      | <p>radio (Matrix)</p> <table border="1"> <tr><td>0</td><td>0</td></tr> <tr><td>1</td><td>1</td></tr> <tr><td>2</td><td>2</td></tr> <tr><td>3</td><td>3</td></tr> <tr><td>4</td><td>4</td></tr> <tr><td>5</td><td>5</td></tr> <tr><td>6</td><td>6</td></tr> <tr><td>7</td><td>7</td></tr> <tr><td>8</td><td>8</td></tr> <tr><td>9</td><td>9</td></tr> <tr><td>10</td><td>10</td></tr> </table> | 0 | 0                         | 1 | 1 | 2 | 2 | 3 | 3 | 4 | 4                  | 5 | 5 | 6 | 6 | 7 | 7 | 8 | 8 | 9 | 9 | 10 | 10 |
| 0  | 0                                                                                       |                                                                                                                                                                                                                                                                                                                                                                                                                                                                                 |                                                                                                                                                                                                                                                                                                                                                                                               |   |                           |   |   |   |   |   |   |   |                    |   |   |   |   |   |   |   |   |   |   |    |    |
| 1  | 1                                                                                       |                                                                                                                                                                                                                                                                                                                                                                                                                                                                                 |                                                                                                                                                                                                                                                                                                                                                                                               |   |                           |   |   |   |   |   |   |   |                    |   |   |   |   |   |   |   |   |   |   |    |    |
| 2  | 2                                                                                       |                                                                                                                                                                                                                                                                                                                                                                                                                                                                                 |                                                                                                                                                                                                                                                                                                                                                                                               |   |                           |   |   |   |   |   |   |   |                    |   |   |   |   |   |   |   |   |   |   |    |    |
| 3  | 3                                                                                       |                                                                                                                                                                                                                                                                                                                                                                                                                                                                                 |                                                                                                                                                                                                                                                                                                                                                                                               |   |                           |   |   |   |   |   |   |   |                    |   |   |   |   |   |   |   |   |   |   |    |    |
| 4  | 4                                                                                       |                                                                                                                                                                                                                                                                                                                                                                                                                                                                                 |                                                                                                                                                                                                                                                                                                                                                                                               |   |                           |   |   |   |   |   |   |   |                    |   |   |   |   |   |   |   |   |   |   |    |    |
| 5  | 5                                                                                       |                                                                                                                                                                                                                                                                                                                                                                                                                                                                                 |                                                                                                                                                                                                                                                                                                                                                                                               |   |                           |   |   |   |   |   |   |   |                    |   |   |   |   |   |   |   |   |   |   |    |    |
| 6  | 6                                                                                       |                                                                                                                                                                                                                                                                                                                                                                                                                                                                                 |                                                                                                                                                                                                                                                                                                                                                                                               |   |                           |   |   |   |   |   |   |   |                    |   |   |   |   |   |   |   |   |   |   |    |    |
| 7  | 7                                                                                       |                                                                                                                                                                                                                                                                                                                                                                                                                                                                                 |                                                                                                                                                                                                                                                                                                                                                                                               |   |                           |   |   |   |   |   |   |   |                    |   |   |   |   |   |   |   |   |   |   |    |    |
| 8  | 8                                                                                       |                                                                                                                                                                                                                                                                                                                                                                                                                                                                                 |                                                                                                                                                                                                                                                                                                                                                                                               |   |                           |   |   |   |   |   |   |   |                    |   |   |   |   |   |   |   |   |   |   |    |    |
| 9  | 9                                                                                       |                                                                                                                                                                                                                                                                                                                                                                                                                                                                                 |                                                                                                                                                                                                                                                                                                                                                                                               |   |                           |   |   |   |   |   |   |   |                    |   |   |   |   |   |   |   |   |   |   |    |    |
| 10 | 10                                                                                      |                                                                                                                                                                                                                                                                                                                                                                                                                                                                                 |                                                                                                                                                                                                                                                                                                                                                                                               |   |                           |   |   |   |   |   |   |   |                    |   |   |   |   |   |   |   |   |   |   |    |    |
| 81 | <p>so1</p> <p>Show the field ONLY if:<br/>[current_on_oat] = '0'</p>                    | <p>Section Header: <i>Motivation Socrates 8D Please read the following statements carefully. Each one describes a way that you might (or might not) feel about your drug use. For each statement, select one number from 1 to 5, to indicate how much you agree or disagree with it right now. Please select one and only one number for every statement. U, K: so1ru-so19ru, M: so1ru-so19ru, so1om-so19om</i></p> <p>1. I really want to make changes in my use of drugs.</p> | <p>radio (Matrix)</p> <table border="1"> <tr><td>1</td><td>1 Absolutely do not agree</td></tr> <tr><td>2</td><td>2</td></tr> <tr><td>3</td><td>3</td></tr> <tr><td>4</td><td>4</td></tr> <tr><td>5</td><td>5 Absolutely agree</td></tr> </table>                                                                                                                                              | 1 | 1 Absolutely do not agree | 2 | 2 | 3 | 3 | 4 | 4 | 5 | 5 Absolutely agree |   |   |   |   |   |   |   |   |   |   |    |    |
| 1  | 1 Absolutely do not agree                                                               |                                                                                                                                                                                                                                                                                                                                                                                                                                                                                 |                                                                                                                                                                                                                                                                                                                                                                                               |   |                           |   |   |   |   |   |   |   |                    |   |   |   |   |   |   |   |   |   |   |    |    |
| 2  | 2                                                                                       |                                                                                                                                                                                                                                                                                                                                                                                                                                                                                 |                                                                                                                                                                                                                                                                                                                                                                                               |   |                           |   |   |   |   |   |   |   |                    |   |   |   |   |   |   |   |   |   |   |    |    |
| 3  | 3                                                                                       |                                                                                                                                                                                                                                                                                                                                                                                                                                                                                 |                                                                                                                                                                                                                                                                                                                                                                                               |   |                           |   |   |   |   |   |   |   |                    |   |   |   |   |   |   |   |   |   |   |    |    |
| 4  | 4                                                                                       |                                                                                                                                                                                                                                                                                                                                                                                                                                                                                 |                                                                                                                                                                                                                                                                                                                                                                                               |   |                           |   |   |   |   |   |   |   |                    |   |   |   |   |   |   |   |   |   |   |    |    |
| 5  | 5 Absolutely agree                                                                      |                                                                                                                                                                                                                                                                                                                                                                                                                                                                                 |                                                                                                                                                                                                                                                                                                                                                                                               |   |                           |   |   |   |   |   |   |   |                    |   |   |   |   |   |   |   |   |   |   |    |    |
| 82 | <p>so2</p> <p>Show the field ONLY if:<br/>[current_on_oat] = '0'</p>                    | <p>2. Sometimes I wonder if I am an addict.</p>                                                                                                                                                                                                                                                                                                                                                                                                                                 | <p>radio (Matrix)</p> <table border="1"> <tr><td>1</td><td>1 Absolutely do not agree</td></tr> <tr><td>2</td><td>2</td></tr> <tr><td>3</td><td>3</td></tr> <tr><td>4</td><td>4</td></tr> <tr><td>5</td><td>5 Absolutely agree</td></tr> </table>                                                                                                                                              | 1 | 1 Absolutely do not agree | 2 | 2 | 3 | 3 | 4 | 4 | 5 | 5 Absolutely agree |   |   |   |   |   |   |   |   |   |   |    |    |
| 1  | 1 Absolutely do not agree                                                               |                                                                                                                                                                                                                                                                                                                                                                                                                                                                                 |                                                                                                                                                                                                                                                                                                                                                                                               |   |                           |   |   |   |   |   |   |   |                    |   |   |   |   |   |   |   |   |   |   |    |    |
| 2  | 2                                                                                       |                                                                                                                                                                                                                                                                                                                                                                                                                                                                                 |                                                                                                                                                                                                                                                                                                                                                                                               |   |                           |   |   |   |   |   |   |   |                    |   |   |   |   |   |   |   |   |   |   |    |    |
| 3  | 3                                                                                       |                                                                                                                                                                                                                                                                                                                                                                                                                                                                                 |                                                                                                                                                                                                                                                                                                                                                                                               |   |                           |   |   |   |   |   |   |   |                    |   |   |   |   |   |   |   |   |   |   |    |    |
| 4  | 4                                                                                       |                                                                                                                                                                                                                                                                                                                                                                                                                                                                                 |                                                                                                                                                                                                                                                                                                                                                                                               |   |                           |   |   |   |   |   |   |   |                    |   |   |   |   |   |   |   |   |   |   |    |    |
| 5  | 5 Absolutely agree                                                                      |                                                                                                                                                                                                                                                                                                                                                                                                                                                                                 |                                                                                                                                                                                                                                                                                                                                                                                               |   |                           |   |   |   |   |   |   |   |                    |   |   |   |   |   |   |   |   |   |   |    |    |
| 83 | <p>so3</p> <p>Show the field ONLY if:<br/>[current_on_oat] = '0'</p>                    | <p>3. If I don't change my drug use soon, my problems are going to get worse.</p>                                                                                                                                                                                                                                                                                                                                                                                               | <p>radio (Matrix)</p> <table border="1"> <tr><td>1</td><td>1 Absolutely do not agree</td></tr> <tr><td>2</td><td>2</td></tr> <tr><td>3</td><td>3</td></tr> <tr><td>4</td><td>4</td></tr> <tr><td>5</td><td>5 Absolutely agree</td></tr> </table>                                                                                                                                              | 1 | 1 Absolutely do not agree | 2 | 2 | 3 | 3 | 4 | 4 | 5 | 5 Absolutely agree |   |   |   |   |   |   |   |   |   |   |    |    |
| 1  | 1 Absolutely do not agree                                                               |                                                                                                                                                                                                                                                                                                                                                                                                                                                                                 |                                                                                                                                                                                                                                                                                                                                                                                               |   |                           |   |   |   |   |   |   |   |                    |   |   |   |   |   |   |   |   |   |   |    |    |
| 2  | 2                                                                                       |                                                                                                                                                                                                                                                                                                                                                                                                                                                                                 |                                                                                                                                                                                                                                                                                                                                                                                               |   |                           |   |   |   |   |   |   |   |                    |   |   |   |   |   |   |   |   |   |   |    |    |
| 3  | 3                                                                                       |                                                                                                                                                                                                                                                                                                                                                                                                                                                                                 |                                                                                                                                                                                                                                                                                                                                                                                               |   |                           |   |   |   |   |   |   |   |                    |   |   |   |   |   |   |   |   |   |   |    |    |
| 4  | 4                                                                                       |                                                                                                                                                                                                                                                                                                                                                                                                                                                                                 |                                                                                                                                                                                                                                                                                                                                                                                               |   |                           |   |   |   |   |   |   |   |                    |   |   |   |   |   |   |   |   |   |   |    |    |
| 5  | 5 Absolutely agree                                                                      |                                                                                                                                                                                                                                                                                                                                                                                                                                                                                 |                                                                                                                                                                                                                                                                                                                                                                                               |   |                           |   |   |   |   |   |   |   |                    |   |   |   |   |   |   |   |   |   |   |    |    |
| 84 | <p>so4</p> <p>Show the field ONLY if:<br/>[current_on_oat] = '0'</p>                    | <p>4. I have already started making some changes in my use of drugs.</p>                                                                                                                                                                                                                                                                                                                                                                                                        | <p>radio (Matrix)</p> <table border="1"> <tr><td>1</td><td>1 Absolutely do not agree</td></tr> <tr><td>2</td><td>2</td></tr> <tr><td>3</td><td>3</td></tr> <tr><td>4</td><td>4</td></tr> <tr><td>5</td><td>5 Absolutely agree</td></tr> </table>                                                                                                                                              | 1 | 1 Absolutely do not agree | 2 | 2 | 3 | 3 | 4 | 4 | 5 | 5 Absolutely agree |   |   |   |   |   |   |   |   |   |   |    |    |
| 1  | 1 Absolutely do not agree                                                               |                                                                                                                                                                                                                                                                                                                                                                                                                                                                                 |                                                                                                                                                                                                                                                                                                                                                                                               |   |                           |   |   |   |   |   |   |   |                    |   |   |   |   |   |   |   |   |   |   |    |    |
| 2  | 2                                                                                       |                                                                                                                                                                                                                                                                                                                                                                                                                                                                                 |                                                                                                                                                                                                                                                                                                                                                                                               |   |                           |   |   |   |   |   |   |   |                    |   |   |   |   |   |   |   |   |   |   |    |    |
| 3  | 3                                                                                       |                                                                                                                                                                                                                                                                                                                                                                                                                                                                                 |                                                                                                                                                                                                                                                                                                                                                                                               |   |                           |   |   |   |   |   |   |   |                    |   |   |   |   |   |   |   |   |   |   |    |    |
| 4  | 4                                                                                       |                                                                                                                                                                                                                                                                                                                                                                                                                                                                                 |                                                                                                                                                                                                                                                                                                                                                                                               |   |                           |   |   |   |   |   |   |   |                    |   |   |   |   |   |   |   |   |   |   |    |    |
| 5  | 5 Absolutely agree                                                                      |                                                                                                                                                                                                                                                                                                                                                                                                                                                                                 |                                                                                                                                                                                                                                                                                                                                                                                               |   |                           |   |   |   |   |   |   |   |                    |   |   |   |   |   |   |   |   |   |   |    |    |

|    |                                                           |                                                                                                                |                                                                                            |
|----|-----------------------------------------------------------|----------------------------------------------------------------------------------------------------------------|--------------------------------------------------------------------------------------------|
| 85 | so5<br>Show the field ONLY if:<br>[current_on_oat] = '0'  | 5. I was using drugs too much at one time, but I've managed to change that.                                    | radio (Matrix)<br>1 1 Absolutely do not agree<br>2 2<br>3 3<br>4 4<br>5 5 Absolutely agree |
| 86 | so6<br>Show the field ONLY if:<br>[current_on_oat] = '0'  | 6. Sometimes I wonder if my drug use is hurting other people.                                                  | radio (Matrix)<br>1 1 Absolutely do not agree<br>2 2<br>3 3<br>4 4<br>5 5 Absolutely agree |
| 87 | so7<br>Show the field ONLY if:<br>[current_on_oat] = '0'  | 7. I have a drug problem.                                                                                      | radio (Matrix)<br>1 1 Absolutely do not agree<br>2 2<br>3 3<br>4 4<br>5 5 Absolutely agree |
| 88 | so8<br>Show the field ONLY if:<br>[current_on_oat] = '0'  | 8. I'm not just thinking about changing my drug use, I'm already doing something about it.                     | radio (Matrix)<br>1 1 Absolutely do not agree<br>2 2<br>3 3<br>4 4<br>5 5 Absolutely agree |
| 89 | so9<br>Show the field ONLY if:<br>[current_on_oat] = '0'  | 9. I have already changed my drug use, and I am looking for ways to keep from slipping back to my old pattern. | radio (Matrix)<br>1 1 Absolutely do not agree<br>2 2<br>3 3<br>4 4<br>5 5 Absolutely agree |
| 90 | so10<br>Show the field ONLY if:<br>[current_on_oat] = '0' | 10. I have serious problems with drugs.                                                                        | radio (Matrix)<br>1 1 Absolutely do not agree<br>2 2<br>3 3<br>4 4<br>5 5 Absolutely agree |
| 91 | so11<br>Show the field ONLY if:<br>[current_on_oat] = '0' | 11. Sometimes I wonder if I am in control of my drug use.                                                      | radio (Matrix)<br>1 1 Absolutely do not agree<br>2 2<br>3 3<br>4 4<br>5 5 Absolutely agree |
| 92 | so12<br>Show the field ONLY if:<br>[current_on_oat] = '0' | 12. My drug use is causing a lot of harm.                                                                      | radio (Matrix)<br>1 1 Absolutely do not agree<br>2 2<br>3 3<br>4 4<br>5 5 Absolutely agree |

|     |                                                           |                                                                                                                     |                                                                                            |
|-----|-----------------------------------------------------------|---------------------------------------------------------------------------------------------------------------------|--------------------------------------------------------------------------------------------|
| 93  | so13<br>Show the field ONLY if:<br>[current_on_oat] = '0' | 13. I am actively doing things now to cut down or stop my use of drugs.                                             | radio (Matrix)<br>1 1 Absolutely do not agree<br>2 2<br>3 3<br>4 4<br>5 5 Absolutely agree |
| 94  | so14<br>Show the field ONLY if:<br>[current_on_oat] = '0' | 14. I want help to keep from going back to the drug problems that I had before.                                     | radio (Matrix)<br>1 1 Absolutely do not agree<br>2 2<br>3 3<br>4 4<br>5 5 Absolutely agree |
| 95  | so15<br>Show the field ONLY if:<br>[current_on_oat] = '0' | 15. I know that I have a drug problem.                                                                              | radio (Matrix)<br>1 1 Absolutely do not agree<br>2 2<br>3 3<br>4 4<br>5 5 Absolutely agree |
| 96  | so16<br>Show the field ONLY if:<br>[current_on_oat] = '0' | 16. There are times when I wonder if I use drugs too much.                                                          | radio (Matrix)<br>1 1 Absolutely do not agree<br>2 2<br>3 3<br>4 4<br>5 5 Absolutely agree |
| 97  | so17<br>Show the field ONLY if:<br>[current_on_oat] = '0' | 17. I am a drug addict.                                                                                             | radio (Matrix)<br>1 1 Absolutely do not agree<br>2 2<br>3 3<br>4 4<br>5 5 Absolutely agree |
| 98  | so18<br>Show the field ONLY if:<br>[current_on_oat] = '0' | 18. I am working hard to change my drug use.                                                                        | radio (Matrix)<br>1 1 Absolutely do not agree<br>2 2<br>3 3<br>4 4<br>5 5 Absolutely agree |
| 99  | so19<br>Show the field ONLY if:<br>[current_on_oat] = '0' | 19. I have made some changes in my drug use, and I want some help to keep from going back to the way I used before. | radio (Matrix)<br>1 1 Absolutely do not agree<br>2 2<br>3 3<br>4 4<br>5 5 Absolutely agree |
| 100 | form_10_and_11_complete                                   | Section Header: <i>Form Status</i><br>Complete?                                                                     | dropdown<br>0 Incomplete<br>1 Unverified<br>2 Complete                                     |

|     |                                                                  |                                                                                                                                         |                                                                                                                                                                                                                                                                                                                                                                                                                           |   |                         |   |          |   |                                             |   |                     |   |               |   |           |   |       |   |        |   |        |    |                       |    |                     |
|-----|------------------------------------------------------------------|-----------------------------------------------------------------------------------------------------------------------------------------|---------------------------------------------------------------------------------------------------------------------------------------------------------------------------------------------------------------------------------------------------------------------------------------------------------------------------------------------------------------------------------------------------------------------------|---|-------------------------|---|----------|---|---------------------------------------------|---|---------------------|---|---------------|---|-----------|---|-------|---|--------|---|--------|----|-----------------------|----|---------------------|
| 101 | interviewer_id_demo                                              | Interviewer ID<br>U: dm_intidru, dm_intidruf1<br>K: dm_intru<br>M: N/A                                                                  | text                                                                                                                                                                                                                                                                                                                                                                                                                      |   |                         |   |          |   |                                             |   |                     |   |               |   |           |   |       |   |        |   |        |    |                       |    |                     |
| 102 | date_demo                                                        | Demographics Interview Date<br>not in U<br>K: dm_dtru<br>M: N/A                                                                         | text                                                                                                                                                                                                                                                                                                                                                                                                                      |   |                         |   |          |   |                                             |   |                     |   |               |   |           |   |       |   |        |   |        |    |                       |    |                     |
| 103 | gender<br>Show the field ONLY if:<br>[event] = '1'               | 1. How would you best identify your gender<br>U, K: dm1ru<br>M: dm1ru, dm1om                                                            | radio<br><table border="1"> <tr><td>1</td><td>Male</td></tr> <tr><td>2</td><td>Female</td></tr> </table>                                                                                                                                                                                                                                                                                                                  | 1 | Male                    | 2 | Female   |   |                                             |   |                     |   |               |   |           |   |       |   |        |   |        |    |                       |    |                     |
| 1   | Male                                                             |                                                                                                                                         |                                                                                                                                                                                                                                                                                                                                                                                                                           |   |                         |   |          |   |                                             |   |                     |   |               |   |           |   |       |   |        |   |        |    |                       |    |                     |
| 2   | Female                                                           |                                                                                                                                         |                                                                                                                                                                                                                                                                                                                                                                                                                           |   |                         |   |          |   |                                             |   |                     |   |               |   |           |   |       |   |        |   |        |    |                       |    |                     |
| 104 | dob<br>Show the field ONLY if:<br>[event] = '1'                  | 2. Please, provide your date birth:<br>U, K: dm2ru<br>M: dm2ru, dm2om<br><i>Use 01 for day. Enter mm/01/yyyy for example 11/01/1961</i> | text (date_mdy, Min: 1917-01-01, Max: 1999-01-01), Identifier                                                                                                                                                                                                                                                                                                                                                             |   |                         |   |          |   |                                             |   |                     |   |               |   |           |   |       |   |        |   |        |    |                       |    |                     |
| 105 | ethnicity<br>Show the field ONLY if:<br>[event] = '1'            | 3. Ethnicity<br>U, K: dm3ru<br>M: dm3ru, dm3om                                                                                          | radio<br><table border="1"> <tr><td>1</td><td>Kyrgyz</td></tr> <tr><td>2</td><td>Moldovan</td></tr> <tr><td>3</td><td>Romanian</td></tr> <tr><td>4</td><td>Romani</td></tr> <tr><td>5</td><td>Russian</td></tr> <tr><td>6</td><td>Ukrainian</td></tr> <tr><td>7</td><td>Uzbek</td></tr> <tr><td>8</td><td>Jewish</td></tr> <tr><td>9</td><td>Gagauz</td></tr> <tr><td>10</td><td>Other - specify below</td></tr> </table> | 1 | Kyrgyz                  | 2 | Moldovan | 3 | Romanian                                    | 4 | Romani              | 5 | Russian       | 6 | Ukrainian | 7 | Uzbek | 8 | Jewish | 9 | Gagauz | 10 | Other - specify below |    |                     |
| 1   | Kyrgyz                                                           |                                                                                                                                         |                                                                                                                                                                                                                                                                                                                                                                                                                           |   |                         |   |          |   |                                             |   |                     |   |               |   |           |   |       |   |        |   |        |    |                       |    |                     |
| 2   | Moldovan                                                         |                                                                                                                                         |                                                                                                                                                                                                                                                                                                                                                                                                                           |   |                         |   |          |   |                                             |   |                     |   |               |   |           |   |       |   |        |   |        |    |                       |    |                     |
| 3   | Romanian                                                         |                                                                                                                                         |                                                                                                                                                                                                                                                                                                                                                                                                                           |   |                         |   |          |   |                                             |   |                     |   |               |   |           |   |       |   |        |   |        |    |                       |    |                     |
| 4   | Romani                                                           |                                                                                                                                         |                                                                                                                                                                                                                                                                                                                                                                                                                           |   |                         |   |          |   |                                             |   |                     |   |               |   |           |   |       |   |        |   |        |    |                       |    |                     |
| 5   | Russian                                                          |                                                                                                                                         |                                                                                                                                                                                                                                                                                                                                                                                                                           |   |                         |   |          |   |                                             |   |                     |   |               |   |           |   |       |   |        |   |        |    |                       |    |                     |
| 6   | Ukrainian                                                        |                                                                                                                                         |                                                                                                                                                                                                                                                                                                                                                                                                                           |   |                         |   |          |   |                                             |   |                     |   |               |   |           |   |       |   |        |   |        |    |                       |    |                     |
| 7   | Uzbek                                                            |                                                                                                                                         |                                                                                                                                                                                                                                                                                                                                                                                                                           |   |                         |   |          |   |                                             |   |                     |   |               |   |           |   |       |   |        |   |        |    |                       |    |                     |
| 8   | Jewish                                                           |                                                                                                                                         |                                                                                                                                                                                                                                                                                                                                                                                                                           |   |                         |   |          |   |                                             |   |                     |   |               |   |           |   |       |   |        |   |        |    |                       |    |                     |
| 9   | Gagauz                                                           |                                                                                                                                         |                                                                                                                                                                                                                                                                                                                                                                                                                           |   |                         |   |          |   |                                             |   |                     |   |               |   |           |   |       |   |        |   |        |    |                       |    |                     |
| 10  | Other - specify below                                            |                                                                                                                                         |                                                                                                                                                                                                                                                                                                                                                                                                                           |   |                         |   |          |   |                                             |   |                     |   |               |   |           |   |       |   |        |   |        |    |                       |    |                     |
| 106 | ethnicity_other<br>Show the field ONLY if:<br>[ethnicity] = '10' | 3a. Other Ethnicity<br>U, K: dm3aru<br>M: dm3aru, dm3aom                                                                                | text                                                                                                                                                                                                                                                                                                                                                                                                                      |   |                         |   |          |   |                                             |   |                     |   |               |   |           |   |       |   |        |   |        |    |                       |    |                     |
| 107 | religion_importance<br>Show the field ONLY if:<br>[event] = '1'  | 5. On a scale from 0 to 10, how important is the role of your religion in your life?<br>U, K: dm5ru<br>M: dm5ru, dm5om                  | radio<br><table border="1"> <tr><td>0</td><td>0- not important at all</td></tr> <tr><td>1</td><td>1</td></tr> <tr><td>2</td><td>2</td></tr> <tr><td>3</td><td>3</td></tr> <tr><td>4</td><td>4</td></tr> <tr><td>5</td><td>5</td></tr> <tr><td>6</td><td>6</td></tr> <tr><td>7</td><td>7</td></tr> <tr><td>8</td><td>8</td></tr> <tr><td>9</td><td>9</td></tr> <tr><td>10</td><td>10 - very important</td></tr> </table>   | 0 | 0- not important at all | 1 | 1        | 2 | 2                                           | 3 | 3                   | 4 | 4             | 5 | 5         | 6 | 6     | 7 | 7      | 8 | 8      | 9  | 9                     | 10 | 10 - very important |
| 0   | 0- not important at all                                          |                                                                                                                                         |                                                                                                                                                                                                                                                                                                                                                                                                                           |   |                         |   |          |   |                                             |   |                     |   |               |   |           |   |       |   |        |   |        |    |                       |    |                     |
| 1   | 1                                                                |                                                                                                                                         |                                                                                                                                                                                                                                                                                                                                                                                                                           |   |                         |   |          |   |                                             |   |                     |   |               |   |           |   |       |   |        |   |        |    |                       |    |                     |
| 2   | 2                                                                |                                                                                                                                         |                                                                                                                                                                                                                                                                                                                                                                                                                           |   |                         |   |          |   |                                             |   |                     |   |               |   |           |   |       |   |        |   |        |    |                       |    |                     |
| 3   | 3                                                                |                                                                                                                                         |                                                                                                                                                                                                                                                                                                                                                                                                                           |   |                         |   |          |   |                                             |   |                     |   |               |   |           |   |       |   |        |   |        |    |                       |    |                     |
| 4   | 4                                                                |                                                                                                                                         |                                                                                                                                                                                                                                                                                                                                                                                                                           |   |                         |   |          |   |                                             |   |                     |   |               |   |           |   |       |   |        |   |        |    |                       |    |                     |
| 5   | 5                                                                |                                                                                                                                         |                                                                                                                                                                                                                                                                                                                                                                                                                           |   |                         |   |          |   |                                             |   |                     |   |               |   |           |   |       |   |        |   |        |    |                       |    |                     |
| 6   | 6                                                                |                                                                                                                                         |                                                                                                                                                                                                                                                                                                                                                                                                                           |   |                         |   |          |   |                                             |   |                     |   |               |   |           |   |       |   |        |   |        |    |                       |    |                     |
| 7   | 7                                                                |                                                                                                                                         |                                                                                                                                                                                                                                                                                                                                                                                                                           |   |                         |   |          |   |                                             |   |                     |   |               |   |           |   |       |   |        |   |        |    |                       |    |                     |
| 8   | 8                                                                |                                                                                                                                         |                                                                                                                                                                                                                                                                                                                                                                                                                           |   |                         |   |          |   |                                             |   |                     |   |               |   |           |   |       |   |        |   |        |    |                       |    |                     |
| 9   | 9                                                                |                                                                                                                                         |                                                                                                                                                                                                                                                                                                                                                                                                                           |   |                         |   |          |   |                                             |   |                     |   |               |   |           |   |       |   |        |   |        |    |                       |    |                     |
| 10  | 10 - very important                                              |                                                                                                                                         |                                                                                                                                                                                                                                                                                                                                                                                                                           |   |                         |   |          |   |                                             |   |                     |   |               |   |           |   |       |   |        |   |        |    |                       |    |                     |
| 108 | marital_status<br>Show the field ONLY if:<br>[event] = '1'       | 6. How would you describe your current marital/relationship status: [choose only one]<br>U, K: dm6ru<br>M: dm6ru, dm6om                 | radio<br><table border="1"> <tr><td>1</td><td>Single, never married</td></tr> <tr><td>2</td><td>Married</td></tr> <tr><td>3</td><td>Not married but in a long term relationship</td></tr> <tr><td>4</td><td>Separated /Divorced</td></tr> <tr><td>5</td><td>Widow/widower</td></tr> </table>                                                                                                                              | 1 | Single, never married   | 2 | Married  | 3 | Not married but in a long term relationship | 4 | Separated /Divorced | 5 | Widow/widower |   |           |   |       |   |        |   |        |    |                       |    |                     |
| 1   | Single, never married                                            |                                                                                                                                         |                                                                                                                                                                                                                                                                                                                                                                                                                           |   |                         |   |          |   |                                             |   |                     |   |               |   |           |   |       |   |        |   |        |    |                       |    |                     |
| 2   | Married                                                          |                                                                                                                                         |                                                                                                                                                                                                                                                                                                                                                                                                                           |   |                         |   |          |   |                                             |   |                     |   |               |   |           |   |       |   |        |   |        |    |                       |    |                     |
| 3   | Not married but in a long term relationship                      |                                                                                                                                         |                                                                                                                                                                                                                                                                                                                                                                                                                           |   |                         |   |          |   |                                             |   |                     |   |               |   |           |   |       |   |        |   |        |    |                       |    |                     |
| 4   | Separated /Divorced                                              |                                                                                                                                         |                                                                                                                                                                                                                                                                                                                                                                                                                           |   |                         |   |          |   |                                             |   |                     |   |               |   |           |   |       |   |        |   |        |    |                       |    |                     |
| 5   | Widow/widower                                                    |                                                                                                                                         |                                                                                                                                                                                                                                                                                                                                                                                                                           |   |                         |   |          |   |                                             |   |                     |   |               |   |           |   |       |   |        |   |        |    |                       |    |                     |
| 109 | children<br>Show the field ONLY if:<br>[event] = '1'             | 7. How many total children do you have?<br>U, K: dm7ru<br>M: dm7ru, : dm7om                                                             | text (number, Min: 0, Max: 20)<br>Custom alignment: LH                                                                                                                                                                                                                                                                                                                                                                    |   |                         |   |          |   |                                             |   |                     |   |               |   |           |   |       |   |        |   |        |    |                       |    |                     |

|     |                                                                               |                                                                                                                                                                        |                                                                                                                                                                                                                                                                                                                                                                                                                                                                                                                                                                                                                                                                                                                    |   |                         |        |                                       |                 |                                               |   |                                                  |                          |                                                                |                 |                                                        |   |                      |        |            |                 |                                                  |   |                 |                        |   |                 |                 |   |                 |         |   |                 |                      |
|-----|-------------------------------------------------------------------------------|------------------------------------------------------------------------------------------------------------------------------------------------------------------------|--------------------------------------------------------------------------------------------------------------------------------------------------------------------------------------------------------------------------------------------------------------------------------------------------------------------------------------------------------------------------------------------------------------------------------------------------------------------------------------------------------------------------------------------------------------------------------------------------------------------------------------------------------------------------------------------------------------------|---|-------------------------|--------|---------------------------------------|-----------------|-----------------------------------------------|---|--------------------------------------------------|--------------------------|----------------------------------------------------------------|-----------------|--------------------------------------------------------|---|----------------------|--------|------------|-----------------|--------------------------------------------------|---|-----------------|------------------------|---|-----------------|-----------------|---|-----------------|---------|---|-----------------|----------------------|
| 110 | young_children<br>Show the field ONLY if:<br>[event] = '1' AND [children] > 0 | 8. How many of these children are younger than 18 years old?<br>U, K: dm8ru<br>M: dm8ru, dm8om                                                                         | text (number, Min: 0, Max: 20)<br>Custom alignment: LH                                                                                                                                                                                                                                                                                                                                                                                                                                                                                                                                                                                                                                                             |   |                         |        |                                       |                 |                                               |   |                                                  |                          |                                                                |                 |                                                        |   |                      |        |            |                 |                                                  |   |                 |                        |   |                 |                 |   |                 |         |   |                 |                      |
| 111 | education<br>Show the field ONLY if:<br>[event] = '1'                         | 9. Highest level of education completed:<br>U, K: dm9ru<br>M: dm9ru, dm9om                                                                                             | radio<br><table border="1"> <tr><td>1</td><td>No education</td></tr> <tr><td>2</td><td>Completed primary school (grades 1-4)</td></tr> <tr><td>3</td><td>Incomplete high school education (grades 5-9)</td></tr> <tr><td>4</td><td>Completed high school education (grades 10-12)</td></tr> <tr><td>5</td><td>Completed high school-vocational education (technical college)</td></tr> <tr><td>6</td><td>Incomplete university education (completed third year)</td></tr> <tr><td>7</td><td>Completed university</td></tr> </table>                                                                                                                                                                                | 1 | No education            | 2      | Completed primary school (grades 1-4) | 3               | Incomplete high school education (grades 5-9) | 4 | Completed high school education (grades 10-12)   | 5                        | Completed high school-vocational education (technical college) | 6               | Incomplete university education (completed third year) | 7 | Completed university |        |            |                 |                                                  |   |                 |                        |   |                 |                 |   |                 |         |   |                 |                      |
| 1   | No education                                                                  |                                                                                                                                                                        |                                                                                                                                                                                                                                                                                                                                                                                                                                                                                                                                                                                                                                                                                                                    |   |                         |        |                                       |                 |                                               |   |                                                  |                          |                                                                |                 |                                                        |   |                      |        |            |                 |                                                  |   |                 |                        |   |                 |                 |   |                 |         |   |                 |                      |
| 2   | Completed primary school (grades 1-4)                                         |                                                                                                                                                                        |                                                                                                                                                                                                                                                                                                                                                                                                                                                                                                                                                                                                                                                                                                                    |   |                         |        |                                       |                 |                                               |   |                                                  |                          |                                                                |                 |                                                        |   |                      |        |            |                 |                                                  |   |                 |                        |   |                 |                 |   |                 |         |   |                 |                      |
| 3   | Incomplete high school education (grades 5-9)                                 |                                                                                                                                                                        |                                                                                                                                                                                                                                                                                                                                                                                                                                                                                                                                                                                                                                                                                                                    |   |                         |        |                                       |                 |                                               |   |                                                  |                          |                                                                |                 |                                                        |   |                      |        |            |                 |                                                  |   |                 |                        |   |                 |                 |   |                 |         |   |                 |                      |
| 4   | Completed high school education (grades 10-12)                                |                                                                                                                                                                        |                                                                                                                                                                                                                                                                                                                                                                                                                                                                                                                                                                                                                                                                                                                    |   |                         |        |                                       |                 |                                               |   |                                                  |                          |                                                                |                 |                                                        |   |                      |        |            |                 |                                                  |   |                 |                        |   |                 |                 |   |                 |         |   |                 |                      |
| 5   | Completed high school-vocational education (technical college)                |                                                                                                                                                                        |                                                                                                                                                                                                                                                                                                                                                                                                                                                                                                                                                                                                                                                                                                                    |   |                         |        |                                       |                 |                                               |   |                                                  |                          |                                                                |                 |                                                        |   |                      |        |            |                 |                                                  |   |                 |                        |   |                 |                 |   |                 |         |   |                 |                      |
| 6   | Incomplete university education (completed third year)                        |                                                                                                                                                                        |                                                                                                                                                                                                                                                                                                                                                                                                                                                                                                                                                                                                                                                                                                                    |   |                         |        |                                       |                 |                                               |   |                                                  |                          |                                                                |                 |                                                        |   |                      |        |            |                 |                                                  |   |                 |                        |   |                 |                 |   |                 |         |   |                 |                      |
| 7   | Completed university                                                          |                                                                                                                                                                        |                                                                                                                                                                                                                                                                                                                                                                                                                                                                                                                                                                                                                                                                                                                    |   |                         |        |                                       |                 |                                               |   |                                                  |                          |                                                                |                 |                                                        |   |                      |        |            |                 |                                                  |   |                 |                        |   |                 |                 |   |                 |         |   |                 |                      |
| 112 | housing                                                                       | 10. U: Which is the best description of your living situation (where do you live) ? K, M: Where are you going to live?<br>U, K: dm10ru, dm10ruf1<br>M: dm10ru, dm10om  | radio<br><table border="1"> <tr><td>1</td><td>My own place that I own</td></tr> <tr><td>2</td><td>Apartment/house that I rent</td></tr> <tr><td>3</td><td>My parents/relatives place</td></tr> <tr><td>4</td><td>My friend's place (include boyfriend/girlfriend)</td></tr> <tr><td>5</td><td>Dormitory/hotel (temporary housing)</td></tr> <tr><td>6</td><td>Homeless shelter</td></tr> <tr><td>7</td><td>Homeless</td></tr> <tr><td>8</td><td>Don't know</td></tr> <tr><td>9</td><td>Other (Specify other place where you live below)</td></tr> </table>                                                                                                                                                         | 1 | My own place that I own | 2      | Apartment/house that I rent           | 3               | My parents/relatives place                    | 4 | My friend's place (include boyfriend/girlfriend) | 5                        | Dormitory/hotel (temporary housing)                            | 6               | Homeless shelter                                       | 7 | Homeless             | 8      | Don't know | 9               | Other (Specify other place where you live below) |   |                 |                        |   |                 |                 |   |                 |         |   |                 |                      |
| 1   | My own place that I own                                                       |                                                                                                                                                                        |                                                                                                                                                                                                                                                                                                                                                                                                                                                                                                                                                                                                                                                                                                                    |   |                         |        |                                       |                 |                                               |   |                                                  |                          |                                                                |                 |                                                        |   |                      |        |            |                 |                                                  |   |                 |                        |   |                 |                 |   |                 |         |   |                 |                      |
| 2   | Apartment/house that I rent                                                   |                                                                                                                                                                        |                                                                                                                                                                                                                                                                                                                                                                                                                                                                                                                                                                                                                                                                                                                    |   |                         |        |                                       |                 |                                               |   |                                                  |                          |                                                                |                 |                                                        |   |                      |        |            |                 |                                                  |   |                 |                        |   |                 |                 |   |                 |         |   |                 |                      |
| 3   | My parents/relatives place                                                    |                                                                                                                                                                        |                                                                                                                                                                                                                                                                                                                                                                                                                                                                                                                                                                                                                                                                                                                    |   |                         |        |                                       |                 |                                               |   |                                                  |                          |                                                                |                 |                                                        |   |                      |        |            |                 |                                                  |   |                 |                        |   |                 |                 |   |                 |         |   |                 |                      |
| 4   | My friend's place (include boyfriend/girlfriend)                              |                                                                                                                                                                        |                                                                                                                                                                                                                                                                                                                                                                                                                                                                                                                                                                                                                                                                                                                    |   |                         |        |                                       |                 |                                               |   |                                                  |                          |                                                                |                 |                                                        |   |                      |        |            |                 |                                                  |   |                 |                        |   |                 |                 |   |                 |         |   |                 |                      |
| 5   | Dormitory/hotel (temporary housing)                                           |                                                                                                                                                                        |                                                                                                                                                                                                                                                                                                                                                                                                                                                                                                                                                                                                                                                                                                                    |   |                         |        |                                       |                 |                                               |   |                                                  |                          |                                                                |                 |                                                        |   |                      |        |            |                 |                                                  |   |                 |                        |   |                 |                 |   |                 |         |   |                 |                      |
| 6   | Homeless shelter                                                              |                                                                                                                                                                        |                                                                                                                                                                                                                                                                                                                                                                                                                                                                                                                                                                                                                                                                                                                    |   |                         |        |                                       |                 |                                               |   |                                                  |                          |                                                                |                 |                                                        |   |                      |        |            |                 |                                                  |   |                 |                        |   |                 |                 |   |                 |         |   |                 |                      |
| 7   | Homeless                                                                      |                                                                                                                                                                        |                                                                                                                                                                                                                                                                                                                                                                                                                                                                                                                                                                                                                                                                                                                    |   |                         |        |                                       |                 |                                               |   |                                                  |                          |                                                                |                 |                                                        |   |                      |        |            |                 |                                                  |   |                 |                        |   |                 |                 |   |                 |         |   |                 |                      |
| 8   | Don't know                                                                    |                                                                                                                                                                        |                                                                                                                                                                                                                                                                                                                                                                                                                                                                                                                                                                                                                                                                                                                    |   |                         |        |                                       |                 |                                               |   |                                                  |                          |                                                                |                 |                                                        |   |                      |        |            |                 |                                                  |   |                 |                        |   |                 |                 |   |                 |         |   |                 |                      |
| 9   | Other (Specify other place where you live below)                              |                                                                                                                                                                        |                                                                                                                                                                                                                                                                                                                                                                                                                                                                                                                                                                                                                                                                                                                    |   |                         |        |                                       |                 |                                               |   |                                                  |                          |                                                                |                 |                                                        |   |                      |        |            |                 |                                                  |   |                 |                        |   |                 |                 |   |                 |         |   |                 |                      |
| 113 | housing_other<br>Show the field ONLY if:<br>[housing] = '9'                   | 10a. Other (Specify other place where you live):<br>U, K: dm10aru, dm10aruf1<br>M: dm10aru, dm10aom                                                                    | text                                                                                                                                                                                                                                                                                                                                                                                                                                                                                                                                                                                                                                                                                                               |   |                         |        |                                       |                 |                                               |   |                                                  |                          |                                                                |                 |                                                        |   |                      |        |            |                 |                                                  |   |                 |                        |   |                 |                 |   |                 |         |   |                 |                      |
| 114 | housing_security                                                              | 11. How sure are you that you will be able to remain at this place to live (scale from 1: very unsure to 5: very sure)?<br>U, K: dm11ru, dm11ruf1<br>M: dm11ru, dm11om | radio<br><table border="1"> <tr><td>1</td><td>1 (Very unsure)</td></tr> <tr><td>2</td><td>2</td></tr> <tr><td>3</td><td>3</td></tr> <tr><td>4</td><td>4</td></tr> <tr><td>5</td><td>5 (Very sure)</td></tr> </table>                                                                                                                                                                                                                                                                                                                                                                                                                                                                                               | 1 | 1 (Very unsure)         | 2      | 2                                     | 3               | 3                                             | 4 | 4                                                | 5                        | 5 (Very sure)                                                  |                 |                                                        |   |                      |        |            |                 |                                                  |   |                 |                        |   |                 |                 |   |                 |         |   |                 |                      |
| 1   | 1 (Very unsure)                                                               |                                                                                                                                                                        |                                                                                                                                                                                                                                                                                                                                                                                                                                                                                                                                                                                                                                                                                                                    |   |                         |        |                                       |                 |                                               |   |                                                  |                          |                                                                |                 |                                                        |   |                      |        |            |                 |                                                  |   |                 |                        |   |                 |                 |   |                 |         |   |                 |                      |
| 2   | 2                                                                             |                                                                                                                                                                        |                                                                                                                                                                                                                                                                                                                                                                                                                                                                                                                                                                                                                                                                                                                    |   |                         |        |                                       |                 |                                               |   |                                                  |                          |                                                                |                 |                                                        |   |                      |        |            |                 |                                                  |   |                 |                        |   |                 |                 |   |                 |         |   |                 |                      |
| 3   | 3                                                                             |                                                                                                                                                                        |                                                                                                                                                                                                                                                                                                                                                                                                                                                                                                                                                                                                                                                                                                                    |   |                         |        |                                       |                 |                                               |   |                                                  |                          |                                                                |                 |                                                        |   |                      |        |            |                 |                                                  |   |                 |                        |   |                 |                 |   |                 |         |   |                 |                      |
| 4   | 4                                                                             |                                                                                                                                                                        |                                                                                                                                                                                                                                                                                                                                                                                                                                                                                                                                                                                                                                                                                                                    |   |                         |        |                                       |                 |                                               |   |                                                  |                          |                                                                |                 |                                                        |   |                      |        |            |                 |                                                  |   |                 |                        |   |                 |                 |   |                 |         |   |                 |                      |
| 5   | 5 (Very sure)                                                                 |                                                                                                                                                                        |                                                                                                                                                                                                                                                                                                                                                                                                                                                                                                                                                                                                                                                                                                                    |   |                         |        |                                       |                 |                                               |   |                                                  |                          |                                                                |                 |                                                        |   |                      |        |            |                 |                                                  |   |                 |                        |   |                 |                 |   |                 |         |   |                 |                      |
| 115 | housing_alone                                                                 | 12. U: Do you currently live alone? K, M: Are you going to live alone?<br>U, K: dm12ru, dm12ruf1<br>M: dm12ru, dm12om                                                  | radio<br><table border="1"> <tr><td>1</td><td>Yes</td></tr> <tr><td>0</td><td>No</td></tr> </table>                                                                                                                                                                                                                                                                                                                                                                                                                                                                                                                                                                                                                | 1 | Yes                     | 0      | No                                    |                 |                                               |   |                                                  |                          |                                                                |                 |                                                        |   |                      |        |            |                 |                                                  |   |                 |                        |   |                 |                 |   |                 |         |   |                 |                      |
| 1   | Yes                                                                           |                                                                                                                                                                        |                                                                                                                                                                                                                                                                                                                                                                                                                                                                                                                                                                                                                                                                                                                    |   |                         |        |                                       |                 |                                               |   |                                                  |                          |                                                                |                 |                                                        |   |                      |        |            |                 |                                                  |   |                 |                        |   |                 |                 |   |                 |         |   |                 |                      |
| 0   | No                                                                            |                                                                                                                                                                        |                                                                                                                                                                                                                                                                                                                                                                                                                                                                                                                                                                                                                                                                                                                    |   |                         |        |                                       |                 |                                               |   |                                                  |                          |                                                                |                 |                                                        |   |                      |        |            |                 |                                                  |   |                 |                        |   |                 |                 |   |                 |         |   |                 |                      |
| 116 | housing_with<br>Show the field ONLY if:<br>[housing_alone] = '0'              | 13. Who currently lives in there?<br>U, K: dm13ru, dm13ruf1<br>M: dm13ru, dm13om                                                                                       | checkbox<br><table border="1"> <tr><td>a</td><td>housing_with__a</td><td>Spouse</td></tr> <tr><td>b</td><td>housing_with__b</td><td>Children</td></tr> <tr><td>c</td><td>housing_with__c</td><td>Unmarried sexual partner</td></tr> <tr><td>d</td><td>housing_with__d</td><td>Mother</td></tr> <tr><td>e</td><td>housing_with__e</td><td>Father</td></tr> <tr><td>f</td><td>housing_with__f</td><td>Sibling</td></tr> <tr><td>g</td><td>housing_with__g</td><td>Extended family member</td></tr> <tr><td>h</td><td>housing_with__h</td><td>Spouse's family</td></tr> <tr><td>i</td><td>housing_with__i</td><td>Friends</td></tr> <tr><td>j</td><td>housing_with__j</td><td>Other, specify below</td></tr> </table> | a | housing_with__a         | Spouse | b                                     | housing_with__b | Children                                      | c | housing_with__c                                  | Unmarried sexual partner | d                                                              | housing_with__d | Mother                                                 | e | housing_with__e      | Father | f          | housing_with__f | Sibling                                          | g | housing_with__g | Extended family member | h | housing_with__h | Spouse's family | i | housing_with__i | Friends | j | housing_with__j | Other, specify below |
| a   | housing_with__a                                                               | Spouse                                                                                                                                                                 |                                                                                                                                                                                                                                                                                                                                                                                                                                                                                                                                                                                                                                                                                                                    |   |                         |        |                                       |                 |                                               |   |                                                  |                          |                                                                |                 |                                                        |   |                      |        |            |                 |                                                  |   |                 |                        |   |                 |                 |   |                 |         |   |                 |                      |
| b   | housing_with__b                                                               | Children                                                                                                                                                               |                                                                                                                                                                                                                                                                                                                                                                                                                                                                                                                                                                                                                                                                                                                    |   |                         |        |                                       |                 |                                               |   |                                                  |                          |                                                                |                 |                                                        |   |                      |        |            |                 |                                                  |   |                 |                        |   |                 |                 |   |                 |         |   |                 |                      |
| c   | housing_with__c                                                               | Unmarried sexual partner                                                                                                                                               |                                                                                                                                                                                                                                                                                                                                                                                                                                                                                                                                                                                                                                                                                                                    |   |                         |        |                                       |                 |                                               |   |                                                  |                          |                                                                |                 |                                                        |   |                      |        |            |                 |                                                  |   |                 |                        |   |                 |                 |   |                 |         |   |                 |                      |
| d   | housing_with__d                                                               | Mother                                                                                                                                                                 |                                                                                                                                                                                                                                                                                                                                                                                                                                                                                                                                                                                                                                                                                                                    |   |                         |        |                                       |                 |                                               |   |                                                  |                          |                                                                |                 |                                                        |   |                      |        |            |                 |                                                  |   |                 |                        |   |                 |                 |   |                 |         |   |                 |                      |
| e   | housing_with__e                                                               | Father                                                                                                                                                                 |                                                                                                                                                                                                                                                                                                                                                                                                                                                                                                                                                                                                                                                                                                                    |   |                         |        |                                       |                 |                                               |   |                                                  |                          |                                                                |                 |                                                        |   |                      |        |            |                 |                                                  |   |                 |                        |   |                 |                 |   |                 |         |   |                 |                      |
| f   | housing_with__f                                                               | Sibling                                                                                                                                                                |                                                                                                                                                                                                                                                                                                                                                                                                                                                                                                                                                                                                                                                                                                                    |   |                         |        |                                       |                 |                                               |   |                                                  |                          |                                                                |                 |                                                        |   |                      |        |            |                 |                                                  |   |                 |                        |   |                 |                 |   |                 |         |   |                 |                      |
| g   | housing_with__g                                                               | Extended family member                                                                                                                                                 |                                                                                                                                                                                                                                                                                                                                                                                                                                                                                                                                                                                                                                                                                                                    |   |                         |        |                                       |                 |                                               |   |                                                  |                          |                                                                |                 |                                                        |   |                      |        |            |                 |                                                  |   |                 |                        |   |                 |                 |   |                 |         |   |                 |                      |
| h   | housing_with__h                                                               | Spouse's family                                                                                                                                                        |                                                                                                                                                                                                                                                                                                                                                                                                                                                                                                                                                                                                                                                                                                                    |   |                         |        |                                       |                 |                                               |   |                                                  |                          |                                                                |                 |                                                        |   |                      |        |            |                 |                                                  |   |                 |                        |   |                 |                 |   |                 |         |   |                 |                      |
| i   | housing_with__i                                                               | Friends                                                                                                                                                                |                                                                                                                                                                                                                                                                                                                                                                                                                                                                                                                                                                                                                                                                                                                    |   |                         |        |                                       |                 |                                               |   |                                                  |                          |                                                                |                 |                                                        |   |                      |        |            |                 |                                                  |   |                 |                        |   |                 |                 |   |                 |         |   |                 |                      |
| j   | housing_with__j                                                               | Other, specify below                                                                                                                                                   |                                                                                                                                                                                                                                                                                                                                                                                                                                                                                                                                                                                                                                                                                                                    |   |                         |        |                                       |                 |                                               |   |                                                  |                          |                                                                |                 |                                                        |   |                      |        |            |                 |                                                  |   |                 |                        |   |                 |                 |   |                 |         |   |                 |                      |
| 117 | housing_with_other<br>Show the field ONLY if:<br>[housing_with(j)] = '1'      | 13a. Other person in household specify<br>U, K: dm13aru, dm13aruf1<br>M: dm13aru, dm13aom                                                                              | text                                                                                                                                                                                                                                                                                                                                                                                                                                                                                                                                                                                                                                                                                                               |   |                         |        |                                       |                 |                                               |   |                                                  |                          |                                                                |                 |                                                        |   |                      |        |            |                 |                                                  |   |                 |                        |   |                 |                 |   |                 |         |   |                 |                      |

|     |                                                          |                                                                                                                                                                                                      |                                                                                                                                                                                     |
|-----|----------------------------------------------------------|------------------------------------------------------------------------------------------------------------------------------------------------------------------------------------------------------|-------------------------------------------------------------------------------------------------------------------------------------------------------------------------------------|
| 118 | housing_time<br>Show the field ONLY if:<br>[event] = '1' | 14. How long have you lived in this place?<br>U: dm14ru<br>K, M: N/A                                                                                                                                 | radio<br>1 My entire life<br>2 Most of my life<br>3 A few years<br>4 A few months<br>5 A few days                                                                                   |
| 119 | employment                                               | 15. How would you describe your CURRENT employment situation?<br>U: dm15ru, dm15ruf1<br>K, M: N/A                                                                                                    | radio<br>1 Full time<br>2 Part time<br>3 Temporary / Seasonal<br>4 Day laborer<br>5 Not employed                                                                                    |
| 120 | employment_2                                             | 15. How would you describe your CURRENT employment situation?<br>K: dm15f1__1: dm15f1__5                                                                                                             | checkbox<br>1 employment_2__1 Full time<br>2 employment_2__2 Part time<br>3 employment_2__3 Temporary / Seasonal<br>4 employment_2__4 Day laborer<br>5 employment_2__5 Not employed |
| 121 | income                                                   | 16. What is your total monthly income from all the sources (official and unofficial) in American Dollars?<br>U, K: dm16ru, dm16ruf1<br>M: dm16ru, dm16om                                             | text (number, Min: 0, Max: 25000)                                                                                                                                                   |
| 122 | income_leasing                                           | Section Header: <i>DM17. Do any of the following additional sources contribute to your "TOTAL" monthly income?</i><br>Leasing (apartment, car, etc.) U, K: dm17a1ru dm17a1ruf1, M: dm17a1ru, dm17aom | radio (Matrix)<br>1 Yes<br>0 No                                                                                                                                                     |
| 123 | income_social_pay                                        | Social payments (pension, allowance, etc.) U, K: dm17bru dm17bruf1 M: dm17bru, dm17bom                                                                                                               | radio (Matrix)<br>1 Yes<br>0 No                                                                                                                                                     |
| 124 | income_goods_money                                       | Exchange goods for money U, K: dm17cru dm17cruf1, M: dm17cru, dm17com                                                                                                                                | radio (Matrix)<br>1 Yes<br>0 No                                                                                                                                                     |
| 125 | official_pris_work                                       | Official work in prison U: N/A, K: dm17dru, M: dm17dru, dm17dom                                                                                                                                      | radio (Matrix)<br>1 Yes<br>0 No                                                                                                                                                     |
| 126 | unofficial_pris_work                                     | Unofficial work in prison U: N/A, K: dm17eru, M: dm17eru, dm17eom                                                                                                                                    | radio (Matrix)<br>1 Yes<br>0 No                                                                                                                                                     |
| 127 | income_goods_goods                                       | Exchange goods for goods U, K: dm17fru dm17fruf1, M: dm17fru, dm17fom                                                                                                                                | radio (Matrix)<br>1 Yes<br>0 No                                                                                                                                                     |
| 128 | income_relatives                                         | Relatives support U, K: dm17gru dm17gruf1, M: dm17gru, dm17gom                                                                                                                                       | radio (Matrix)<br>1 Yes<br>0 No                                                                                                                                                     |
| 129 | income_other                                             | Other U, K: dm17hru dm17hruf1, M: dm17hru, dm17hom                                                                                                                                                   | radio (Matrix)<br>1 Yes<br>0 No                                                                                                                                                     |
| 130 | income_other_describe                                    | 17 Other<br>U, K: dm17othru dm17othruf1<br>M: dm17othru, dm17othom                                                                                                                                   | text                                                                                                                                                                                |

|                                                                        |                                                                  |                                                                                                                                                                                                                        |                                                        |
|------------------------------------------------------------------------|------------------------------------------------------------------|------------------------------------------------------------------------------------------------------------------------------------------------------------------------------------------------------------------------|--------------------------------------------------------|
| 131                                                                    | passport_yn                                                      | 18b. Do you have a passport?<br>U, K: dm18bru dm18bruf1<br>M: dm18bru, dm18bom                                                                                                                                         | radio<br>1 Yes<br>0 No<br>7 Other                      |
| 132                                                                    | passport_other<br>Show the field ONLY if:<br>[passport_yn] = '7' | Describe your passport situation<br>U: dm18bothru<br>K: N/A                                                                                                                                                            | text                                                   |
| 133                                                                    | id_card_yn                                                       | 19. Do you have an ID number/card<br>U, K: dm19ru dm19ruf1<br>M: dm19ru, dm19om                                                                                                                                        | radio<br>1 Yes<br>0 No                                 |
| 134                                                                    | demographics_complete                                            | Section Header: <i>Form Status</i><br>Complete?                                                                                                                                                                        | dropdown<br>0 Incomplete<br>1 Unverified<br>2 Complete |
| Instrument: <b>Criminal Justice History</b> (criminal_justice_history) |                                                                  |                                                                                                                                                                                                                        | <a href="#">^ Collapse</a>                             |
| 135                                                                    | cjhlabel                                                         | The next series of questions are going to ask you about history with law enforcement. This information will be used only by the research team, please, be honest as possible.                                          | descriptive                                            |
| 136                                                                    | cjh_interviewer                                                  | interviewer ID<br>K: cjh_intru<br>M: N/A                                                                                                                                                                               | text                                                   |
| 137                                                                    | cjh_interview_date                                               | Interview Date<br>K: cjh_dtru<br>M: N/A                                                                                                                                                                                | text (date_mdy)                                        |
| 138                                                                    | cjh1                                                             | 1. Have you ever been in pre-trial detention centers (SIZO)?<br>U, K: cjh1ru<br>M: cjh1ru, cjh1om                                                                                                                      | yesno<br>1 Yes<br>0 No                                 |
| 139                                                                    | cjh2<br>Show the field ONLY if:<br>[cjh1] = '1'                  | 2. How many total times have you been in pre-trial detention centers (SIZO)?<br><br>U, K:cjh2ru<br>M: cjh2ru, cjh2om<br><i>times</i>                                                                                   | text (number)                                          |
| 140                                                                    | cjh3y<br>Show the field ONLY if:<br>[cjh1] = '1'                 | 3. How many years, months, and days did you spend in a pre-trial detention center (SIZO) last time you were in SIZO? Enter "0" for zero months or days.<br>Years<br>U, K:cjh3yru<br>M:cjh3yru, cjh3yom<br><i>Years</i> | text (integer)                                         |
| 141                                                                    | cjh3m<br>Show the field ONLY if:<br>[cjh1] = '1'                 | 3. Months<br>U, K:cjh3mru<br>M: cjh3mru, cjh3mom<br><i>Months</i>                                                                                                                                                      | text (integer, Min: 0, Max: 12)                        |
| 142                                                                    | cjh3d<br>Show the field ONLY if:<br>[cjh1] = '1'                 | 3. Days<br>U, K: cjh3dru<br>M: cjh3dru, cjh3dom<br><i>Days</i>                                                                                                                                                         | text (integer, Min: 0, Max: 30)                        |
| 143                                                                    | cjh4                                                             | 4. During the LATEST time in SIZO, did you experience symptoms of abstinence syndrome?<br><br>U; cjh4ru<br>K, M: N/A                                                                                                   | yesno<br>1 Yes<br>0 No                                 |
| 144                                                                    | cjh4a                                                            | 4a. Have you ever been in prison (NOT including SIZO)?<br><br>U;cjh4a_proru<br>K, M: N/A                                                                                                                               | yesno<br>1 Yes<br>0 No                                 |

|     |                                                               |                                                                                                                                                            |                                                                                                                                                                                                                                                                                                                                                                                                                                                                              |   |            |                |            |         |                         |   |         |                        |   |         |                           |   |         |                      |   |         |       |   |         |       |
|-----|---------------------------------------------------------------|------------------------------------------------------------------------------------------------------------------------------------------------------------|------------------------------------------------------------------------------------------------------------------------------------------------------------------------------------------------------------------------------------------------------------------------------------------------------------------------------------------------------------------------------------------------------------------------------------------------------------------------------|---|------------|----------------|------------|---------|-------------------------|---|---------|------------------------|---|---------|---------------------------|---|---------|----------------------|---|---------|-------|---|---------|-------|
| 145 | cjh5<br>Show the field ONLY if: [cjh4a] = '1'                 | 5. How old were you at the time of your first imprisonment (NOT including SIZO)?<br>U, K:cjh5ru<br>M: cjh5ru, cjh5om                                       | text (number, Min: 14, Max: 90)                                                                                                                                                                                                                                                                                                                                                                                                                                              |   |            |                |            |         |                         |   |         |                        |   |         |                           |   |         |                      |   |         |       |   |         |       |
| 146 | cjh6<br>Show the field ONLY if: [cjh4a] = '1'                 | 6. Approximately how many times have you been in prison (not including SIZO)?<br>U, K:cjh6ru<br>M: cjh6ru. cjh6om                                          | text (number, Min: 0)                                                                                                                                                                                                                                                                                                                                                                                                                                                        |   |            |                |            |         |                         |   |         |                        |   |         |                           |   |         |                      |   |         |       |   |         |       |
| 147 | cjh7y<br>Show the field ONLY if: [cjh4a] = '1'                | 7. How many total years, months have you spent in prison (not including SIZO) throughout your life?<br>Years<br>U, K:cjh7yru<br>M: cjh7yom<br><i>Years</i> | text (number)                                                                                                                                                                                                                                                                                                                                                                                                                                                                |   |            |                |            |         |                         |   |         |                        |   |         |                           |   |         |                      |   |         |       |   |         |       |
| 148 | cjh7m<br>Show the field ONLY if: [cjh4a] = '1'                | 7. Months<br>U, K:cjh7mru<br>M cjh7mru, cjh7mom<br><i>Months</i>                                                                                           | text (number, Min: 0, Max: 12)                                                                                                                                                                                                                                                                                                                                                                                                                                               |   |            |                |            |         |                         |   |         |                        |   |         |                           |   |         |                      |   |         |       |   |         |       |
| 149 | cjh7d                                                         | 7. Days<br>U: N/A<br>K: cjh7dru<br>M: cjh7dru, cjh7dom                                                                                                     | text (number, Min: 0, Max: 30)                                                                                                                                                                                                                                                                                                                                                                                                                                               |   |            |                |            |         |                         |   |         |                        |   |         |                           |   |         |                      |   |         |       |   |         |       |
| 150 | cjh7ay                                                        | 7a. When did you enter prison this time? Year<br><br>U: N/A<br>K: cjh7aru<br>M: cjh7aom                                                                    | text (number, Min: 1970, Max: 2018)                                                                                                                                                                                                                                                                                                                                                                                                                                          |   |            |                |            |         |                         |   |         |                        |   |         |                           |   |         |                      |   |         |       |   |         |       |
| 151 | cjh7am                                                        | 7a. Month<br><br>U: N/A<br>K: cjh7amru<br>M: cjh7amom                                                                                                      | text (number, Min: 0, Max: 12)                                                                                                                                                                                                                                                                                                                                                                                                                                               |   |            |                |            |         |                         |   |         |                        |   |         |                           |   |         |                      |   |         |       |   |         |       |
| 152 | cjh8                                                          | 8. Type of offence(s) for the last incarceration (check all that apply):<br>U, K:cjh8ru<br>M: cjh8om                                                       | checkbox<br><table border="1"> <tr><td>1</td><td>cjh8__1</td><td>Homicide</td></tr> <tr><td>2</td><td>cjh8__2</td><td>Violent-related crime</td></tr> <tr><td>3</td><td>cjh8__3</td><td>Property-related crime</td></tr> <tr><td>4</td><td>cjh8__4</td><td>Substance-related offence</td></tr> <tr><td>5</td><td>cjh8__5</td><td>Sexual-related crime</td></tr> <tr><td>6</td><td>cjh8__6</td><td>Fraud</td></tr> <tr><td>7</td><td>cjh8__7</td><td>Other</td></tr> </table> | 1 | cjh8__1    | Homicide       | 2          | cjh8__2 | Violent-related crime   | 3 | cjh8__3 | Property-related crime | 4 | cjh8__4 | Substance-related offence | 5 | cjh8__5 | Sexual-related crime | 6 | cjh8__6 | Fraud | 7 | cjh8__7 | Other |
| 1   | cjh8__1                                                       | Homicide                                                                                                                                                   |                                                                                                                                                                                                                                                                                                                                                                                                                                                                              |   |            |                |            |         |                         |   |         |                        |   |         |                           |   |         |                      |   |         |       |   |         |       |
| 2   | cjh8__2                                                       | Violent-related crime                                                                                                                                      |                                                                                                                                                                                                                                                                                                                                                                                                                                                                              |   |            |                |            |         |                         |   |         |                        |   |         |                           |   |         |                      |   |         |       |   |         |       |
| 3   | cjh8__3                                                       | Property-related crime                                                                                                                                     |                                                                                                                                                                                                                                                                                                                                                                                                                                                                              |   |            |                |            |         |                         |   |         |                        |   |         |                           |   |         |                      |   |         |       |   |         |       |
| 4   | cjh8__4                                                       | Substance-related offence                                                                                                                                  |                                                                                                                                                                                                                                                                                                                                                                                                                                                                              |   |            |                |            |         |                         |   |         |                        |   |         |                           |   |         |                      |   |         |       |   |         |       |
| 5   | cjh8__5                                                       | Sexual-related crime                                                                                                                                       |                                                                                                                                                                                                                                                                                                                                                                                                                                                                              |   |            |                |            |         |                         |   |         |                        |   |         |                           |   |         |                      |   |         |       |   |         |       |
| 6   | cjh8__6                                                       | Fraud                                                                                                                                                      |                                                                                                                                                                                                                                                                                                                                                                                                                                                                              |   |            |                |            |         |                         |   |         |                        |   |         |                           |   |         |                      |   |         |       |   |         |       |
| 7   | cjh8__7                                                       | Other                                                                                                                                                      |                                                                                                                                                                                                                                                                                                                                                                                                                                                                              |   |            |                |            |         |                         |   |         |                        |   |         |                           |   |         |                      |   |         |       |   |         |       |
| 153 | cjh8oth<br>Show the field ONLY if: [cjh8(7)] = '1'            | 8. Other<br>U, K:cjh8othru<br>M: cjh8othom                                                                                                                 | text                                                                                                                                                                                                                                                                                                                                                                                                                                                                         |   |            |                |            |         |                         |   |         |                        |   |         |                           |   |         |                      |   |         |       |   |         |       |
| 154 | cjh9<br>Show the field ONLY if: [screen_arm_1][country] = '2' | 9. Which caste within prison do people of your group pertain to?<br>U: N/A<br>K: cjh9ru<br>M: cjh9ru. cjh9om                                               | checkbox<br><table border="1"> <tr><td>1</td><td>cjh9__1</td><td>??????/blatnye</td></tr> <tr><td>2</td><td>cjh9__2</td><td>??????????/poriadochnye</td></tr> <tr><td>3</td><td>cjh9__3</td><td>????/gady</td></tr> <tr><td>4</td><td>cjh9__4</td><td>??????????/obizehnye</td></tr> <tr><td>5</td><td>cjh9__5</td><td>??????/ other</td></tr> </table>                                                                                                                      | 1 | cjh9__1    | ??????/blatnye | 2          | cjh9__2 | ??????????/poriadochnye | 3 | cjh9__3 | ????/gady              | 4 | cjh9__4 | ??????????/obizehnye      | 5 | cjh9__5 | ??????/ other        |   |         |       |   |         |       |
| 1   | cjh9__1                                                       | ??????/blatnye                                                                                                                                             |                                                                                                                                                                                                                                                                                                                                                                                                                                                                              |   |            |                |            |         |                         |   |         |                        |   |         |                           |   |         |                      |   |         |       |   |         |       |
| 2   | cjh9__2                                                       | ??????????/poriadochnye                                                                                                                                    |                                                                                                                                                                                                                                                                                                                                                                                                                                                                              |   |            |                |            |         |                         |   |         |                        |   |         |                           |   |         |                      |   |         |       |   |         |       |
| 3   | cjh9__3                                                       | ????/gady                                                                                                                                                  |                                                                                                                                                                                                                                                                                                                                                                                                                                                                              |   |            |                |            |         |                         |   |         |                        |   |         |                           |   |         |                      |   |         |       |   |         |       |
| 4   | cjh9__4                                                       | ??????????/obizehnye                                                                                                                                       |                                                                                                                                                                                                                                                                                                                                                                                                                                                                              |   |            |                |            |         |                         |   |         |                        |   |         |                           |   |         |                      |   |         |       |   |         |       |
| 5   | cjh9__5                                                       | ??????/ other                                                                                                                                              |                                                                                                                                                                                                                                                                                                                                                                                                                                                                              |   |            |                |            |         |                         |   |         |                        |   |         |                           |   |         |                      |   |         |       |   |         |       |
| 155 | cjh9a                                                         | 9a. Other;<br>U: N/A<br>K: cjh9othru<br>M: cjh9othru, cjh9othom                                                                                            | text                                                                                                                                                                                                                                                                                                                                                                                                                                                                         |   |            |                |            |         |                         |   |         |                        |   |         |                           |   |         |                      |   |         |       |   |         |       |
| 156 | criminal_justice_history_complete                             | Section Header: <i>Form Status</i><br>Complete?                                                                                                            | dropdown<br><table border="1"> <tr><td>0</td><td>Incomplete</td></tr> <tr><td>1</td><td>Unverified</td></tr> <tr><td>2</td><td>Complete</td></tr> </table>                                                                                                                                                                                                                                                                                                                   | 0 | Incomplete | 1              | Unverified | 2       | Complete                |   |         |                        |   |         |                           |   |         |                      |   |         |       |   |         |       |
| 0   | Incomplete                                                    |                                                                                                                                                            |                                                                                                                                                                                                                                                                                                                                                                                                                                                                              |   |            |                |            |         |                         |   |         |                        |   |         |                           |   |         |                      |   |         |       |   |         |       |
| 1   | Unverified                                                    |                                                                                                                                                            |                                                                                                                                                                                                                                                                                                                                                                                                                                                                              |   |            |                |            |         |                         |   |         |                        |   |         |                           |   |         |                      |   |         |       |   |         |       |
| 2   | Complete                                                      |                                                                                                                                                            |                                                                                                                                                                                                                                                                                                                                                                                                                                                                              |   |            |                |            |         |                         |   |         |                        |   |         |                           |   |         |                      |   |         |       |   |         |       |



| Instrument: <b>Form 12 Lab Results</b> (form_12_lab_results) <span style="float: right;">^ Collapse</span> |                                                                  |                                                                                                              |                                                                                                                                                            |   |                      |   |                      |   |          |
|------------------------------------------------------------------------------------------------------------|------------------------------------------------------------------|--------------------------------------------------------------------------------------------------------------|------------------------------------------------------------------------------------------------------------------------------------------------------------|---|----------------------|---|----------------------|---|----------|
| 157                                                                                                        | test_date                                                        | Date of lab testing                                                                                          | text (date_mdy), Required                                                                                                                                  |   |                      |   |                      |   |          |
| 158                                                                                                        | log_date                                                         | Form Submission date                                                                                         | text (date_mdy)                                                                                                                                            |   |                      |   |                      |   |          |
| 159                                                                                                        | f12_interviewer_id                                               | Form 12 interviewer ID                                                                                       | text                                                                                                                                                       |   |                      |   |                      |   |          |
| 160                                                                                                        | pre_test_done                                                    | Section Header: <i>HIV Infection</i><br>HIV pre-test consultation was done:                                  | yesno, Required<br><table border="1"> <tr><td>1</td><td>Yes</td></tr> <tr><td>0</td><td>No</td></tr> </table>                                              | 1 | Yes                  | 0 | No                   |   |          |
| 1                                                                                                          | Yes                                                              |                                                                                                              |                                                                                                                                                            |   |                      |   |                      |   |          |
| 0                                                                                                          | No                                                               |                                                                                                              |                                                                                                                                                            |   |                      |   |                      |   |          |
| 161                                                                                                        | pre_test_reason<br>Show the field ONLY if: [pre_test_done] = '2' | If the pre-test consultation was not done, write the reason here;                                            | text                                                                                                                                                       |   |                      |   |                      |   |          |
| 162                                                                                                        | date_res_given                                                   | Date results were given:                                                                                     | text (date_mdy)                                                                                                                                            |   |                      |   |                      |   |          |
| 163                                                                                                        | post_test                                                        | Was the post-test consultation done?                                                                         | yesno, Required<br><table border="1"> <tr><td>1</td><td>Yes</td></tr> <tr><td>0</td><td>No</td></tr> </table>                                              | 1 | Yes                  | 0 | No                   |   |          |
| 1                                                                                                          | Yes                                                              |                                                                                                              |                                                                                                                                                            |   |                      |   |                      |   |          |
| 0                                                                                                          | No                                                               |                                                                                                              |                                                                                                                                                            |   |                      |   |                      |   |          |
| 164                                                                                                        | post_test_reason<br>Show the field ONLY if: [post_test] = '2'    | Give the reason why the post-test consultation was not done.                                                 | text                                                                                                                                                       |   |                      |   |                      |   |          |
| 165                                                                                                        | result_hiv                                                       | Section Header: <i>Test Results</i><br>HIV                                                                   | radio<br><table border="1"> <tr><td>1</td><td>Preliminary positive</td></tr> <tr><td>0</td><td>Preliminary negative</td></tr> </table>                     | 1 | Preliminary positive | 0 | Preliminary negative |   |          |
| 1                                                                                                          | Preliminary positive                                             |                                                                                                              |                                                                                                                                                            |   |                      |   |                      |   |          |
| 0                                                                                                          | Preliminary negative                                             |                                                                                                              |                                                                                                                                                            |   |                      |   |                      |   |          |
| 166                                                                                                        | hiv_pos<br>Show the field ONLY if: [result_hiv] = '1'            | Recommended - to take confirmatory test:                                                                     | yesno<br><table border="1"> <tr><td>1</td><td>Yes</td></tr> <tr><td>0</td><td>No</td></tr> </table>                                                        | 1 | Yes                  | 0 | No                   |   |          |
| 1                                                                                                          | Yes                                                              |                                                                                                              |                                                                                                                                                            |   |                      |   |                      |   |          |
| 0                                                                                                          | No                                                               |                                                                                                              |                                                                                                                                                            |   |                      |   |                      |   |          |
| 167                                                                                                        | hiv_neg<br>Show the field ONLY if: [result_hiv] = '2'            | Recommended - in case of risky behaviors and taken into account the "window" repeat the test after 3 months: | yesno<br><table border="1"> <tr><td>1</td><td>Yes</td></tr> <tr><td>0</td><td>No</td></tr> </table>                                                        | 1 | Yes                  | 0 | No                   |   |          |
| 1                                                                                                          | Yes                                                              |                                                                                                              |                                                                                                                                                            |   |                      |   |                      |   |          |
| 0                                                                                                          | No                                                               |                                                                                                              |                                                                                                                                                            |   |                      |   |                      |   |          |
| 168                                                                                                        | result_hbv                                                       | HBV Result:                                                                                                  | radio, Required<br><table border="1"> <tr><td>1</td><td>Preliminary positive</td></tr> <tr><td>0</td><td>Preliminary negative</td></tr> </table>           | 1 | Preliminary positive | 0 | Preliminary negative |   |          |
| 1                                                                                                          | Preliminary positive                                             |                                                                                                              |                                                                                                                                                            |   |                      |   |                      |   |          |
| 0                                                                                                          | Preliminary negative                                             |                                                                                                              |                                                                                                                                                            |   |                      |   |                      |   |          |
| 169                                                                                                        | hbv_pos<br>Show the field ONLY if: [result_hbv] = '1'            | HBV Preliminary positive-Recommended - to take confirmatory test                                             | yesno<br><table border="1"> <tr><td>1</td><td>Yes</td></tr> <tr><td>0</td><td>No</td></tr> </table>                                                        | 1 | Yes                  | 0 | No                   |   |          |
| 1                                                                                                          | Yes                                                              |                                                                                                              |                                                                                                                                                            |   |                      |   |                      |   |          |
| 0                                                                                                          | No                                                               |                                                                                                              |                                                                                                                                                            |   |                      |   |                      |   |          |
| 170                                                                                                        | result_hcv                                                       | HCV test result                                                                                              | radio, Required<br><table border="1"> <tr><td>1</td><td>Preliminary positive</td></tr> <tr><td>0</td><td>Preliminary negative</td></tr> </table>           | 1 | Preliminary positive | 0 | Preliminary negative |   |          |
| 1                                                                                                          | Preliminary positive                                             |                                                                                                              |                                                                                                                                                            |   |                      |   |                      |   |          |
| 0                                                                                                          | Preliminary negative                                             |                                                                                                              |                                                                                                                                                            |   |                      |   |                      |   |          |
| 171                                                                                                        | hcv_pos<br>Show the field ONLY if: [result_hbv] = '1'            | Preiliminary positive HCV: Recommended - to take confirmatory test:                                          | yesno<br><table border="1"> <tr><td>1</td><td>Yes</td></tr> <tr><td>0</td><td>No</td></tr> </table>                                                        | 1 | Yes                  | 0 | No                   |   |          |
| 1                                                                                                          | Yes                                                              |                                                                                                              |                                                                                                                                                            |   |                      |   |                      |   |          |
| 0                                                                                                          | No                                                               |                                                                                                              |                                                                                                                                                            |   |                      |   |                      |   |          |
| 172                                                                                                        | result_syphilis                                                  | Syphilis Test Result                                                                                         | radio, Required<br><table border="1"> <tr><td>1</td><td>Preliminary positive</td></tr> <tr><td>0</td><td>Preliminary negative</td></tr> </table>           | 1 | Preliminary positive | 0 | Preliminary negative |   |          |
| 1                                                                                                          | Preliminary positive                                             |                                                                                                              |                                                                                                                                                            |   |                      |   |                      |   |          |
| 0                                                                                                          | Preliminary negative                                             |                                                                                                              |                                                                                                                                                            |   |                      |   |                      |   |          |
| 173                                                                                                        | syph_pos<br>Show the field ONLY if: [result_hbv] = '1'           | Preliminary positive for syphilis, recommended - to take confirmatory test                                   | yesno<br><table border="1"> <tr><td>1</td><td>Yes</td></tr> <tr><td>0</td><td>No</td></tr> </table>                                                        | 1 | Yes                  | 0 | No                   |   |          |
| 1                                                                                                          | Yes                                                              |                                                                                                              |                                                                                                                                                            |   |                      |   |                      |   |          |
| 0                                                                                                          | No                                                               |                                                                                                              |                                                                                                                                                            |   |                      |   |                      |   |          |
| 174                                                                                                        | form_12_lab_results_complete                                     | Section Header: <i>Form Status</i><br>Complete?                                                              | dropdown<br><table border="1"> <tr><td>0</td><td>Incomplete</td></tr> <tr><td>1</td><td>Unverified</td></tr> <tr><td>2</td><td>Complete</td></tr> </table> | 0 | Incomplete           | 1 | Unverified           | 2 | Complete |
| 0                                                                                                          | Incomplete                                                       |                                                                                                              |                                                                                                                                                            |   |                      |   |                      |   |          |
| 1                                                                                                          | Unverified                                                       |                                                                                                              |                                                                                                                                                            |   |                      |   |                      |   |          |
| 2                                                                                                          | Complete                                                         |                                                                                                              |                                                                                                                                                            |   |                      |   |                      |   |          |

| Instrument: <b>Age At Drug Initiation</b> (age_at_drug_initiation) <span style="float: right;">^ Collapse</span> |                                 |                                                                                                                                                                                                                                                                                                                                        |                                                                                                                                                            |   |            |   |            |   |          |
|------------------------------------------------------------------------------------------------------------------|---------------------------------|----------------------------------------------------------------------------------------------------------------------------------------------------------------------------------------------------------------------------------------------------------------------------------------------------------------------------------------|------------------------------------------------------------------------------------------------------------------------------------------------------------|---|------------|---|------------|---|----------|
| 175                                                                                                              | adi_interviewer_id              | Interviewer ID<br>U: N/A<br>K: adintru                                                                                                                                                                                                                                                                                                 | text                                                                                                                                                       |   |            |   |            |   |          |
| 176                                                                                                              | adi_date                        | Interview Date<br>U: N/A<br>K: addtru                                                                                                                                                                                                                                                                                                  | text (date_mdy)                                                                                                                                            |   |            |   |            |   |          |
| 177                                                                                                              | drug_start_age                  | 1. How old were you the first time that you used drugs, but did NOT inject them?<br><br>Ukraine: Hidden ad1ru<br>K: N/A<br><i>Put 0 if you have never used non injecting drugs</i>                                                                                                                                                     | text (number, Min: 0, Max: 99)                                                                                                                             |   |            |   |            |   |          |
| 178                                                                                                              | inject_drug_start_age           | 2. How old were you the first time you injected drugs, that is put a needle in your arm?<br>U,K: ad2ru<br><i>Put 0 if you have never injected drugs</i>                                                                                                                                                                                | text (number, Min: 0, Max: 99)                                                                                                                             |   |            |   |            |   |          |
| 179                                                                                                              | inject_opioid_start_age         | 3. How old were you the first time you injected any kind of opioid (shirka, heroin, desomorphine, adnok/buprenorphine, methadone, extract of poppy straw, acetylated extract of poppy straw, chernaya, medical opiates: morphine, opium, omnopon, promedol)<br><br>U, K: ad3ru<br><i>Put 0 if you have never injected opioid drugs</i> | text (number, Min: 0, Max: 99)                                                                                                                             |   |            |   |            |   |          |
| 180                                                                                                              | age_at_drug_initiation_complete | Section Header: <i>Form Status</i><br>Complete?                                                                                                                                                                                                                                                                                        | dropdown<br><table border="1"> <tr><td>0</td><td>Incomplete</td></tr> <tr><td>1</td><td>Unverified</td></tr> <tr><td>2</td><td>Complete</td></tr> </table> | 0 | Incomplete | 1 | Unverified | 2 | Complete |
| 0                                                                                                                | Incomplete                      |                                                                                                                                                                                                                                                                                                                                        |                                                                                                                                                            |   |            |   |            |   |          |
| 1                                                                                                                | Unverified                      |                                                                                                                                                                                                                                                                                                                                        |                                                                                                                                                            |   |            |   |            |   |          |
| 2                                                                                                                | Complete                        |                                                                                                                                                                                                                                                                                                                                        |                                                                                                                                                            |   |            |   |            |   |          |
| Instrument: <b>Dast10</b> (dast10) <span style="float: right;">^ Collapse</span>                                 |                                 |                                                                                                                                                                                                                                                                                                                                        |                                                                                                                                                            |   |            |   |            |   |          |
| 181                                                                                                              | dast_interviewer_id             | Interviewer ID                                                                                                                                                                                                                                                                                                                         | text                                                                                                                                                       |   |            |   |            |   |          |
| 182                                                                                                              | dast_date                       | Interview Date                                                                                                                                                                                                                                                                                                                         | text (date_mdy)                                                                                                                                            |   |            |   |            |   |          |
| 183                                                                                                              | dast                            | The next ten questions have to do with your use of drugs. Please answer Yes or No to each of these questions.<br><br>In the 12 months before this incarceration:                                                                                                                                                                       | descriptive                                                                                                                                                |   |            |   |            |   |          |
| 184                                                                                                              | dast1                           | 1. Have you used drugs other than those required for medical reasons?                                                                                                                                                                                                                                                                  | radio (Matrix)<br><table border="1"> <tr><td>1</td><td>Yes</td></tr> <tr><td>0</td><td>No</td></tr> </table>                                               | 1 | Yes        | 0 | No         |   |          |
| 1                                                                                                                | Yes                             |                                                                                                                                                                                                                                                                                                                                        |                                                                                                                                                            |   |            |   |            |   |          |
| 0                                                                                                                | No                              |                                                                                                                                                                                                                                                                                                                                        |                                                                                                                                                            |   |            |   |            |   |          |
| 185                                                                                                              | dast2                           | 2. Do you abuse more than one drug at a time?                                                                                                                                                                                                                                                                                          | radio (Matrix)<br><table border="1"> <tr><td>1</td><td>Yes</td></tr> <tr><td>0</td><td>No</td></tr> </table>                                               | 1 | Yes        | 0 | No         |   |          |
| 1                                                                                                                | Yes                             |                                                                                                                                                                                                                                                                                                                                        |                                                                                                                                                            |   |            |   |            |   |          |
| 0                                                                                                                | No                              |                                                                                                                                                                                                                                                                                                                                        |                                                                                                                                                            |   |            |   |            |   |          |
| 186                                                                                                              | dast4                           | 3. Have you ever had "blackouts" or "flashbacks" as a result of drug use?                                                                                                                                                                                                                                                              | radio (Matrix)<br><table border="1"> <tr><td>1</td><td>Yes</td></tr> <tr><td>0</td><td>No</td></tr> </table>                                               | 1 | Yes        | 0 | No         |   |          |
| 1                                                                                                                | Yes                             |                                                                                                                                                                                                                                                                                                                                        |                                                                                                                                                            |   |            |   |            |   |          |
| 0                                                                                                                | No                              |                                                                                                                                                                                                                                                                                                                                        |                                                                                                                                                            |   |            |   |            |   |          |
| 187                                                                                                              | dast5                           | 4. Do you ever feel bad or guilty about your drug use?                                                                                                                                                                                                                                                                                 | radio (Matrix)<br><table border="1"> <tr><td>1</td><td>Yes</td></tr> <tr><td>0</td><td>No</td></tr> </table>                                               | 1 | Yes        | 0 | No         |   |          |
| 1                                                                                                                | Yes                             |                                                                                                                                                                                                                                                                                                                                        |                                                                                                                                                            |   |            |   |            |   |          |
| 0                                                                                                                | No                              |                                                                                                                                                                                                                                                                                                                                        |                                                                                                                                                            |   |            |   |            |   |          |
| 188                                                                                                              | dast6                           | 5. Does your spouse (or parent) ever complain about your involvement with drugs?                                                                                                                                                                                                                                                       | radio (Matrix)<br><table border="1"> <tr><td>1</td><td>Yes</td></tr> <tr><td>0</td><td>No</td></tr> </table>                                               | 1 | Yes        | 0 | No         |   |          |
| 1                                                                                                                | Yes                             |                                                                                                                                                                                                                                                                                                                                        |                                                                                                                                                            |   |            |   |            |   |          |
| 0                                                                                                                | No                              |                                                                                                                                                                                                                                                                                                                                        |                                                                                                                                                            |   |            |   |            |   |          |
| 189                                                                                                              | dast7                           | 6. Have you neglected your family because of your use of drugs?                                                                                                                                                                                                                                                                        | radio (Matrix)<br><table border="1"> <tr><td>1</td><td>Yes</td></tr> <tr><td>0</td><td>No</td></tr> </table>                                               | 1 | Yes        | 0 | No         |   |          |
| 1                                                                                                                | Yes                             |                                                                                                                                                                                                                                                                                                                                        |                                                                                                                                                            |   |            |   |            |   |          |
| 0                                                                                                                | No                              |                                                                                                                                                                                                                                                                                                                                        |                                                                                                                                                            |   |            |   |            |   |          |

|     |                 |                                                                                                                                                         |                                                                                                                                                                                                                                                                |
|-----|-----------------|---------------------------------------------------------------------------------------------------------------------------------------------------------|----------------------------------------------------------------------------------------------------------------------------------------------------------------------------------------------------------------------------------------------------------------|
| 190 | dast8           | 7. Have you engaged in illegal activities in order to obtain drugs?                                                                                     | radio (Matrix)<br>1 Yes<br>0 No                                                                                                                                                                                                                                |
| 191 | dast9           | 8. Have you ever experienced withdrawal symptoms (i.e. felt sick) when you stopped taking drugs?                                                        | radio (Matrix)<br>1 Yes<br>0 No                                                                                                                                                                                                                                |
| 192 | dast10          | 9. Have you had medical problems as a result of your drug use (e.g., memory loss, hepatitis, convulsions, bleeding etc.)?                               | radio (Matrix)<br>1 Yes<br>0 No                                                                                                                                                                                                                                |
| 193 | dast3           | 10. Are you unable to stop using drugs when you want to?                                                                                                | radio<br>0 Yes<br>1 No<br><br>Custom alignment: RH                                                                                                                                                                                                             |
| 194 | dast_sum        | Score 1 point for each question answered, "YES", except for question (3) for which a "NO" answer receives 1 point and a "YES" answer receives 0 points. | calc<br>Calculation: ([dast1] + [dast2] + [dast3] + [dast4] + [dast5] + [dast6] + [dast7] + [dast8] + [dast9] + [dast10])                                                                                                                                      |
| 195 | dast_score      | DAST-10 Degree of Problem Suggested Score Related to Drug Abuse Action                                                                                  | calc<br>Calculation: if([dast_sum]=0, 1, if([dast_sum]=1, 2, if([dast_sum]=2, 2, if([dast_sum]=3, 3, if([dast_sum]=4, 3, if([dast_sum]=5, 3, if([dast_sum]=6, 4, if([dast_sum]=7, 4, if([dast_sum]=8, 4, if([dast_sum]=9, 5, if([dast_sum]=10, 5, "")))))))))) |
| 196 | dast10_complete | Section Header: <i>Form Status</i><br>Complete?                                                                                                         | dropdown<br>0 Incomplete<br>1 Unverified<br>2 Complete                                                                                                                                                                                                         |

Instrument: **Drug Risk Behaviors** (drug\_risk\_behaviors)[^ Collapse](#)

|     |                                                                     |                                                                                                                                                 |                                            |
|-----|---------------------------------------------------------------------|-------------------------------------------------------------------------------------------------------------------------------------------------|--------------------------------------------|
| 197 | rbd_interviewer_id                                                  | Interviewer ID                                                                                                                                  | text                                       |
| 198 | rbd_date                                                            | Interview Date                                                                                                                                  | text (date_mdy)                            |
| 199 | rbd1                                                                | 1. Have you ever injected drugs even once?<br>K:rbd1ru                                                                                          | radio<br>1 Yes<br>0 No                     |
| 200 | rbd1a<br>Show the field ONLY if:<br>[rbd1] = '1'                    | 1a. Have you ever injected drugs within prison or sizo?<br>K:rbd1aru                                                                            | radio<br>1 Yes<br>0 No                     |
| 201 | rbd1b<br>Show the field ONLY if:<br>[rbd1] = '1'                    | 1b. Your first experience injecting was in:<br>K:rbd1bru                                                                                        | radio<br>1 Community<br>2 Prison<br>3 Sizo |
| 202 | rbd1c<br>Show the field ONLY if:<br>[rbd1b] = '2' or [rbd1b] = '3'  | 1c. How old were you the FIRST time you injected drugs in prison or sizo?<br>K:rbd1cru                                                          | text (integer, Min: 12, Max: 98)           |
| 203 | rbd1d<br>Show the field ONLY if:<br>[rbd1b] = '2' or [rbd1b] = '3'  | 1d. How old were you the LAST time you injected drugs in prison or sizo? K:rbd1dru                                                              | text (integer, Min: 12, Max: 98)           |
| 204 | rbd1e<br>Show the field ONLY if:<br>[rbd1b] = '2' and [rbd1b] = '3' | 1e. When you injected drugs in prison or sizo, how many people usually shared the syringe or needle you used (provide best estimate)? K:rbd1eru | text (integer, Min: 0, Max: 20)            |

|                                                                                                                                |                                                                                  |                                                                                                                                                                   |                                                                                                                                                                                                                                                                                                                                              |
|--------------------------------------------------------------------------------------------------------------------------------|----------------------------------------------------------------------------------|-------------------------------------------------------------------------------------------------------------------------------------------------------------------|----------------------------------------------------------------------------------------------------------------------------------------------------------------------------------------------------------------------------------------------------------------------------------------------------------------------------------------------|
| 205                                                                                                                            | rbdp3<br>Show the field ONLY if: [screen_arm_1][country]= '2'                    | p3. Have you ever used heroin that was given out during razgon? K: rbdp3_kyr                                                                                      | yesno<br>1 Yes<br>0 No                                                                                                                                                                                                                                                                                                                       |
| 206                                                                                                                            | rbdp4<br>Show the field ONLY if: [screen_arm_1][country]= '2'                    | p4. How often did you use heroin that was given out during razgon in the past six months? K: rbdp3_kyr                                                            | text (number, Min: 0, Max: 300)                                                                                                                                                                                                                                                                                                              |
| 207                                                                                                                            | rbd13a<br>Show the field ONLY if: [rbd1] = '1'                                   | 13a. Thinking of the times you did not use a clean needle in the past month, how much trouble would it have been to get a new one? Would it have been... K:rbd13a | radio<br>0 Very Difficult<br>1 Difficult<br>2 Somewhat Difficult<br>3 Easy<br>4 Very Easy<br>8 Refuse to Answer<br>9 Not Applicable                                                                                                                                                                                                          |
| 208                                                                                                                            | rbd14<br>Show the field ONLY if: [rbd1] = '1'                                    | 14. Have you received needles or syringes from needle exchange points?                                                                                            | radio<br>1 Yes<br>0 No                                                                                                                                                                                                                                                                                                                       |
| 209                                                                                                                            | rbd14a<br>Show the field ONLY if: [rbd1] = '1' and [screen_arm_1][country] = '2' | 14a. Have you received needles or syringes from the needle exchange point in a prison facility during this incarceration?<br>U: N/A K: rbd14aa_ky                 | yesno<br>1 Yes<br>0 No                                                                                                                                                                                                                                                                                                                       |
| 210                                                                                                                            | rbdp18<br>Show the field ONLY if: [rbd14a] = '0'                                 | p18. Why did you not use the services of the needle/syringe exchange point during your incarceration? K: rbdp18<br>U: N/A                                         | checkbox<br>1 rbdp18__1 I don't need them<br>2 rbdp18__2 I did not want to disclose I am injecting<br>3 rbdp18__3 I could get syringes from a friend<br>4 rbdp18__4 I am not registered at the syringe exchange point<br>5 rbdp18__5 Medical staff did not give them to me<br>6 rbdp18__6 I already had a syringe<br>7 rbdp18__7 Other:_____ |
| 211                                                                                                                            | rbdp18_other<br>Show the field ONLY if: [rbdp18(7)] = '1'                        | p18 Other:_____<br>U: N/A                                                                                                                                         | text                                                                                                                                                                                                                                                                                                                                         |
| 212                                                                                                                            | rbd19<br>Show the field ONLY if: [rbd1] = '1'                                    | 19. In your lifetime, have you ever split the drug solution in a syringe with other drug users?                                                                   | radio<br>1 Yes<br>0 No                                                                                                                                                                                                                                                                                                                       |
| 213                                                                                                                            | rbdp21<br>Show the field ONLY if: [rbd1] = '1'                                   | p21. How many times in the last 30 days did you front or backload (split the drug solution in a syringe with others)?<br><i>888 Refuse to Answer</i>              | text (number, Min: 0, Max: 888)                                                                                                                                                                                                                                                                                                              |
| 214                                                                                                                            | drug_risk_behaviors_complete                                                     | Section Header: <i>Form Status</i><br>Complete?                                                                                                                   | dropdown<br>0 Incomplete<br>1 Unverified<br>2 Complete                                                                                                                                                                                                                                                                                       |
| Instrument: <b>Inventory Of Drug Use</b> (inventory_of_drug_use) <span style="float: right;"><a href="#">^ Collapse</a></span> |                                                                                  |                                                                                                                                                                   |                                                                                                                                                                                                                                                                                                                                              |
| 215                                                                                                                            | idu_interviewer_id                                                               | Interviewer ID:<br>K:diintru                                                                                                                                      | text                                                                                                                                                                                                                                                                                                                                         |

|     |                                                                                                                  |                                                                                                                                                                                                                                      |                                                                                                                                                                                                                               |   |          |           |    |          |         |   |          |                  |
|-----|------------------------------------------------------------------------------------------------------------------|--------------------------------------------------------------------------------------------------------------------------------------------------------------------------------------------------------------------------------------|-------------------------------------------------------------------------------------------------------------------------------------------------------------------------------------------------------------------------------|---|----------|-----------|----|----------|---------|---|----------|------------------|
| 216 | idu_date                                                                                                         | Interview Date:<br>K:didtru                                                                                                                                                                                                          | text (date_mdy)                                                                                                                                                                                                               |   |          |           |    |          |         |   |          |                  |
| 217 | di2a<br>Show the field ONLY if:<br>[event] = '1'                                                                 | 2a. Have you ever used opioids (i.e. liquid or powered heroin, illegal/street methadone, medical opioids, extract of poppy straw', shirka', 'hanka', 'himka')<br>U, K:di2aru<br>M: di2aru, di2aom<br><br>CODE NO TO '0'              | radio<br><table border="1"> <tr> <td>1</td> <td>Yes</td> </tr> <tr> <td>0</td> <td>No</td> </tr> </table>                                                                                                                     | 1 | Yes      | 0         | No |          |         |   |          |                  |
| 1   | Yes                                                                                                              |                                                                                                                                                                                                                                      |                                                                                                                                                                                                                               |   |          |           |    |          |         |   |          |                  |
| 0   | No                                                                                                               |                                                                                                                                                                                                                                      |                                                                                                                                                                                                                               |   |          |           |    |          |         |   |          |                  |
| 218 | di2c<br>Show the field ONLY if:<br>[event] = '1' and [di2a] = '1'                                                | 2c. In the last 30 days, how many days did you inject opioids(in the form of liquid or powder, including heroin, street methadone, medical opioids, extract of poppy straw', shirka', 'hanka', 'himka')?<br><br>U:di2cru, M:di2druf1 | text (integer, Min: 0, Max: 30)                                                                                                                                                                                               |   |          |           |    |          |         |   |          |                  |
| 219 | di2c_abbrev<br>Show the field ONLY if:<br>[event] = '3' or [event] = '4' or<br>[event] = '5' and [country] = '3' | 2c. In the last 30 days, how many days did you inject heroin?<br><br>U:di2cruf1                                                                                                                                                      | text (integer, Min: 0, Max: 30)                                                                                                                                                                                               |   |          |           |    |          |         |   |          |                  |
| 220 | di2d<br>Show the field ONLY if:<br>[di2a] = '1' and [screen_arm_1][country] <> '3'                               | 2d. In the 30 days JUST BEFORE THIS INCARCERATION, how many days did you inject opioids?<br><br>U: N/A<br>K: di2dru<br>M: di2dru, di2dom                                                                                             | text (integer, Min: 0, Max: 30)                                                                                                                                                                                               |   |          |           |    |          |         |   |          |                  |
| 221 | di3c<br>Show the field ONLY if:<br>[event] = '3' or [event] = '4' or<br>[event] = '5' and [country] = '3'        | 3c. In the last 30 days, how many days did you use illegal/ street methadone?<br><br>U:di3cruf1                                                                                                                                      | text (integer, Min: 0, Max: 30)                                                                                                                                                                                               |   |          |           |    |          |         |   |          |                  |
| 222 | di3d<br>Show the field ONLY if:<br>[event] = '3' or [event] = '4' or<br>[event] = '5' and [country] = '3'        | 3d. How many days have you used opioids (medical opioids, poppy straw extract, 'shirka', 'hanka', 'himka')?<br><br>U:di3druf1                                                                                                        | text (integer, Min: 0, Max: 30)                                                                                                                                                                                               |   |          |           |    |          |         |   |          |                  |
| 223 | di6c<br>Show the field ONLY if:<br>[event] = '3' or [event] = '4' or<br>[event] = '5' and [country] = '3'        | 6c. In the last 30 days, how many days did you use opioids(medical opioids, extract of poppy straw', shirka', 'hanka', 'himka')?<br><br>U:di6cruf1                                                                                   | text (integer, Min: 0, Max: 30)                                                                                                                                                                                               |   |          |           |    |          |         |   |          |                  |
| 224 | di6d<br>Show the field ONLY if:<br>[event] = '3' or [event] = '4' or<br>[event] = '5' and [country] = '3'        | 6d. In the last 30 days, how many days did you inject opioids(medical opioids, extract of poppy straw', shirka', 'hanka', 'himka')?<br><br>U:di6druf1                                                                                | text (integer, Min: 0, Max: 30)                                                                                                                                                                                               |   |          |           |    |          |         |   |          |                  |
| 225 | di6aa<br>Show the field ONLY if:<br>[event] = '1'                                                                | 6aa. Have you ever used DIMEDROL or SOMNOL concurrently with OPIOIDS (heroin, street/illegal methadone, medical opioids, or homemade opioids)?<br><br>U, K: di6aaru<br>M: di6aaru, di26aaom<br><br>Recode 'no' from 2 to 0           | radio<br><table border="1"> <tr> <td>1</td> <td>Yes</td> </tr> <tr> <td>0</td> <td>No</td> </tr> </table>                                                                                                                     | 1 | Yes      | 0         | No |          |         |   |          |                  |
| 1   | Yes                                                                                                              |                                                                                                                                                                                                                                      |                                                                                                                                                                                                                               |   |          |           |    |          |         |   |          |                  |
| 0   | No                                                                                                               |                                                                                                                                                                                                                                      |                                                                                                                                                                                                                               |   |          |           |    |          |         |   |          |                  |
| 226 | di6bb<br>Show the field ONLY if:<br>[event] = '1' AND [di6bb] = '1'                                              | 6bb. Where have you used DIMEDROL or SOMNOL concurrently with OPIOIDS (heroin, street/illegal methadone, medical opioids, or homemade opioids)? (check everything that applies)<br><br>U, K: di6bbu<br>M: di6bbu, di6bbom            | checkbox<br><table border="1"> <tr> <td>1</td> <td>di6bb__1</td> <td>in prison</td> </tr> <tr> <td>2</td> <td>di6bb__2</td> <td>in SIZO</td> </tr> <tr> <td>3</td> <td>di6bb__3</td> <td>in the community</td> </tr> </table> | 1 | di6bb__1 | in prison | 2  | di6bb__2 | in SIZO | 3 | di6bb__3 | in the community |
| 1   | di6bb__1                                                                                                         | in prison                                                                                                                                                                                                                            |                                                                                                                                                                                                                               |   |          |           |    |          |         |   |          |                  |
| 2   | di6bb__2                                                                                                         | in SIZO                                                                                                                                                                                                                              |                                                                                                                                                                                                                               |   |          |           |    |          |         |   |          |                  |
| 3   | di6bb__3                                                                                                         | in the community                                                                                                                                                                                                                     |                                                                                                                                                                                                                               |   |          |           |    |          |         |   |          |                  |

|     |                                                                                                                                             |                                                                                                                                                                                                                                                                     |                                                                                                           |   |     |   |    |
|-----|---------------------------------------------------------------------------------------------------------------------------------------------|---------------------------------------------------------------------------------------------------------------------------------------------------------------------------------------------------------------------------------------------------------------------|-----------------------------------------------------------------------------------------------------------|---|-----|---|----|
| 227 | di6dd<br>Show the field ONLY if:<br>[event] = '3' or [event] = '4' or [event] = '5' or ([di6bb] = '1' and [screen_arm_1][country] < > '3' ) | 6dd. How many days out of the last 30 days have you used DIMEDROL or SOMNOL concurrently with OPIOIDS (heroin, street/illegal methadone, medical opioids, or homemade opioids)?<br><br>U:di6ddru, di6ddruf1 M: di6eeruf1<br><i>Days</i>                             | text (integer, Min: 0, Max: 30)                                                                           |   |     |   |    |
| 228 | di6ee<br>Show the field ONLY if:<br>[di6bb] = '1' and [event] = '1'                                                                         | 6ee. In the 30 DAYS BEFORE THIS INCARCERATION, how many days did you use DIMEDROL or SOMNOL concurrently with OPIOIDS (heroin, street/illegal methadone, medical opioids, or homemade opioids)?<br><br>U: N/A<br>K:di6eeru<br>M. M: di6eeru, di6eeom<br><i>Days</i> | text (integer, Min: 0, Max: 30)                                                                           |   |     |   |    |
| 229 | di7a<br>Show the field ONLY if:<br>[event] = '1'                                                                                            | 7a. Have you ever used DESOMORPHINE (krokodil, electroshirka)<br><br>U, K:di7aru<br>M: di7aru, di7aom<br><br>Recode 'no' from 2 to 0                                                                                                                                | radio<br><table border="1"> <tr> <td>1</td> <td>Yes</td> </tr> <tr> <td>0</td> <td>No</td> </tr> </table> | 1 | Yes | 0 | No |
| 1   | Yes                                                                                                                                         |                                                                                                                                                                                                                                                                     |                                                                                                           |   |     |   |    |
| 0   | No                                                                                                                                          |                                                                                                                                                                                                                                                                     |                                                                                                           |   |     |   |    |
| 230 | di7c<br>Show the field ONLY if:<br>[di7a] = '1' or [event] = '3' or [event] = '4' or [event] = '5'                                          | 7c. In the last 30 days, how many days did you use DESOMORPHINE (krokodil, electroshirka)<br><br>U: di7dru, di7cruf1<br><i>Days</i>                                                                                                                                 | text (integer, Min: 0, Max: 30)                                                                           |   |     |   |    |
| 231 | di7d<br>Show the field ONLY if:<br>[country] = '3' and ( [event] = '3' or [event] = '4' or [event] = '5')                                   | 7d. In the last 30 days how many days did you inject DESOMORPHINE (krokodil, electroshirka)?<br><br>U: di7druf1<br><i>Days</i>                                                                                                                                      | text (integer, Min: 0, Max: 30)                                                                           |   |     |   |    |
| 232 | di7e<br>Show the field ONLY if:<br>[di7a] = '1' and [screen_arm_1][country] <> '3' and [event] = '1'                                        | 7e. In the last 30 days BEFORE THIS INCARCERATION, how many days did you inject DESOMORPHINE (krokodil, electroshirka)?<br><br>U: N/A<br>K: di7eru<br>M: di7eru, di7eom<br><i>Days</i>                                                                              | text (integer, Min: 0, Max: 30)                                                                           |   |     |   |    |
| 233 | di8c<br>Show the field ONLY if:<br>[country] = '3' and ( [event] = '3' or [event] = '4' or [event] = '5')                                   | 8c. In the last 30 days how many days did you use Benzodiazapine or TRANQUILIZERS (seduxen, sibazone, valium, xanax, sonapaks, phenazepam, nitrazepam, clonazepam, diazepam, relanium)?<br><br>U: di8cruf1<br><i>Days</i>                                           | text (integer, Min: 0, Max: 30)                                                                           |   |     |   |    |
| 234 | di8d<br>Show the field ONLY if:<br>[country] = '3' and ( [event] = '3' or [event] = '4' or [event] = '5')                                   | 8d. In the last 30 days how many days did you inject Benzodiazapine or TRANQUILIZERS (seduxen, sibazone, valium, xanax, sonapaks, phenazepam, nitrazepam, clonazepam, diazepam, relanium)?<br><br>U: di8druf1<br><i>Days</i>                                        | text (integer, Min: 0, Max: 30)                                                                           |   |     |   |    |
| 235 | di9a<br>Show the field ONLY if:<br>[event] = '1'                                                                                            | 9a. Have you ever used STIMULANTS ('boltushka', 'vint', amphetamines, methamphetamines, 'efedra', 'jeff')<br><br>U, K:di9aru<br>M: di9aru, di9aom<br><br>recode 'no' from 2 to 0                                                                                    | radio<br><table border="1"> <tr> <td>1</td> <td>Yes</td> </tr> <tr> <td>0</td> <td>No</td> </tr> </table> | 1 | Yes | 0 | No |
| 1   | Yes                                                                                                                                         |                                                                                                                                                                                                                                                                     |                                                                                                           |   |     |   |    |
| 0   | No                                                                                                                                          |                                                                                                                                                                                                                                                                     |                                                                                                           |   |     |   |    |
| 236 | di9c<br>Show the field ONLY if:<br>[country] = '3' and ( [event] = '3' or [event] = '4' or [event] = '5')                                   | 9c. In the last 30 days how many days did you use STIMULANTS ('boltushka', 'vint', amphetamines, methamphetamines, 'efedra', 'jeff')<br><br>U: di9cruf1<br><i>Days</i>                                                                                              | text (integer, Min: 0, Max: 30)                                                                           |   |     |   |    |

|     |                                                                                                        |                                                                                                                                                                                                                                                                                                                                                                      |                                                                                                                                                                                                                                                                                                                                                                                                                                           |   |     |   |    |   |   |   |   |   |   |   |   |   |   |   |   |   |   |   |   |    |    |
|-----|--------------------------------------------------------------------------------------------------------|----------------------------------------------------------------------------------------------------------------------------------------------------------------------------------------------------------------------------------------------------------------------------------------------------------------------------------------------------------------------|-------------------------------------------------------------------------------------------------------------------------------------------------------------------------------------------------------------------------------------------------------------------------------------------------------------------------------------------------------------------------------------------------------------------------------------------|---|-----|---|----|---|---|---|---|---|---|---|---|---|---|---|---|---|---|---|---|----|----|
| 237 | di9d<br>Show the field ONLY if:<br>[di9a] = '1'                                                        | 9d. In the last 30 days, how many days did you inject STIMULANTS ('boltushka', 'vint', amphetamines, methamphetamines, 'efedra', 'jeff')?<br><br>u: di9dru, di9druf1<br>M: di9cruf1, di9comf1<br><i>Days</i>                                                                                                                                                         | text (integer, Max: 30)                                                                                                                                                                                                                                                                                                                                                                                                                   |   |     |   |    |   |   |   |   |   |   |   |   |   |   |   |   |   |   |   |   |    |    |
| 238 | di9e<br>Show the field ONLY if:<br>[di9a] = '1' and [screen_arm_1][country] <> '3' and [event] = '1'   | 9e. In the last 30 days BEFORE THIS INCARCERATION, how many days did you use STIMULANTS (' boltushka', 'vint', amphetamines, methamphetamines, 'efedra', 'jeff')?<br>U: N/A<br>K: di9eru<br>M: di9eru, di9eom<br><i>Days</i>                                                                                                                                         | text (integer, Max: 30)                                                                                                                                                                                                                                                                                                                                                                                                                   |   |     |   |    |   |   |   |   |   |   |   |   |   |   |   |   |   |   |   |   |    |    |
| 239 | di15a<br>Show the field ONLY if:<br>[event] = '1'                                                      | 15a. Have you ever used more than one substance in same day (INCLUDING alcohol)<br><br>U:di15aru<br>M: di15aru, di15aom<br><br>recode 'no' from 2 to 0                                                                                                                                                                                                               | radio<br><table border="1"> <tr> <td>1</td> <td>Yes</td> </tr> <tr> <td>0</td> <td>No</td> </tr> </table>                                                                                                                                                                                                                                                                                                                                 | 1 | Yes | 0 | No |   |   |   |   |   |   |   |   |   |   |   |   |   |   |   |   |    |    |
| 1   | Yes                                                                                                    |                                                                                                                                                                                                                                                                                                                                                                      |                                                                                                                                                                                                                                                                                                                                                                                                                                           |   |     |   |    |   |   |   |   |   |   |   |   |   |   |   |   |   |   |   |   |    |    |
| 0   | No                                                                                                     |                                                                                                                                                                                                                                                                                                                                                                      |                                                                                                                                                                                                                                                                                                                                                                                                                                           |   |     |   |    |   |   |   |   |   |   |   |   |   |   |   |   |   |   |   |   |    |    |
| 240 | di15b<br>Show the field ONLY if:<br>[di15a] = '1'                                                      | 15c. In the last 30 days, how many days did you use more than one substance in same day (INCLUDING alcohol)<br>U: di15bruf1<br>M: di15bruf1, di15bomf1<br><br><i>Days</i>                                                                                                                                                                                            | text (integer, Min: 0, Max: 30)                                                                                                                                                                                                                                                                                                                                                                                                           |   |     |   |    |   |   |   |   |   |   |   |   |   |   |   |   |   |   |   |   |    |    |
| 241 | di15c<br>Show the field ONLY if:<br>[di15a] = '1'                                                      | 15c. In the last 30 days, how many days did you inject more than one substance in same day (INCLUDING alcohol)<br><br>U: di15cru, di15cruf1<br><br><i>Days</i>                                                                                                                                                                                                       | text (integer, Min: 0, Max: 30)                                                                                                                                                                                                                                                                                                                                                                                                           |   |     |   |    |   |   |   |   |   |   |   |   |   |   |   |   |   |   |   |   |    |    |
| 242 | di15e<br>Show the field ONLY if:<br>[di15a] = '1' and [screen_arm_1][country] <> '3' and [event] = '1' | 15e. In the last 30 days BEFORE THIS INCARCERATION how many days did you use more than one substance in same day (INCLUDING alcohol)<br>U: N/A<br>K: di15eru<br>M: di15eru, di15eom<br><br><i>Days</i>                                                                                                                                                               | text (integer, Min: 0, Max: 30)                                                                                                                                                                                                                                                                                                                                                                                                           |   |     |   |    |   |   |   |   |   |   |   |   |   |   |   |   |   |   |   |   |    |    |
| 243 | di15f<br>Show the field ONLY if:<br>[di15a] = '1' and [screen_arm_1][country] <> '3' and [event] = '1' | 15f. In the last 30 days BEFORE THIS INCARCERATION, how many days did you inject more than one substance in same day (INCLUDING alcohol)?<br>U: N/A<br>K: di15fru<br>M: di15fru, di15fom<br><br><i>Days</i>                                                                                                                                                          | text (integer, Min: 0, Max: 30)                                                                                                                                                                                                                                                                                                                                                                                                           |   |     |   |    |   |   |   |   |   |   |   |   |   |   |   |   |   |   |   |   |    |    |
| 244 | di18                                                                                                   | 18. At this moment, how much do you crave opioids (including heroin and pain killers) on a scale of 0 to 10? (Select a point on the line with 0 being no craving whatsoever and 10 being I think about it all the time)<br><br>U,K:di18ru, di18ruf1<br>M: di18ru, di18om, di18ruf1, di18omf1<br><i>0 - No craving whatsoever; 10 - I think about it all the time</i> | radio<br><table border="1"> <tr> <td>0</td> <td>0</td> </tr> <tr> <td>1</td> <td>1</td> </tr> <tr> <td>2</td> <td>2</td> </tr> <tr> <td>3</td> <td>3</td> </tr> <tr> <td>4</td> <td>4</td> </tr> <tr> <td>5</td> <td>5</td> </tr> <tr> <td>6</td> <td>6</td> </tr> <tr> <td>7</td> <td>7</td> </tr> <tr> <td>8</td> <td>8</td> </tr> <tr> <td>9</td> <td>9</td> </tr> <tr> <td>10</td> <td>10</td> </tr> </table><br>Custom alignment: LH | 0 | 0   | 1 | 1  | 2 | 2 | 3 | 3 | 4 | 4 | 5 | 5 | 6 | 6 | 7 | 7 | 8 | 8 | 9 | 9 | 10 | 10 |
| 0   | 0                                                                                                      |                                                                                                                                                                                                                                                                                                                                                                      |                                                                                                                                                                                                                                                                                                                                                                                                                                           |   |     |   |    |   |   |   |   |   |   |   |   |   |   |   |   |   |   |   |   |    |    |
| 1   | 1                                                                                                      |                                                                                                                                                                                                                                                                                                                                                                      |                                                                                                                                                                                                                                                                                                                                                                                                                                           |   |     |   |    |   |   |   |   |   |   |   |   |   |   |   |   |   |   |   |   |    |    |
| 2   | 2                                                                                                      |                                                                                                                                                                                                                                                                                                                                                                      |                                                                                                                                                                                                                                                                                                                                                                                                                                           |   |     |   |    |   |   |   |   |   |   |   |   |   |   |   |   |   |   |   |   |    |    |
| 3   | 3                                                                                                      |                                                                                                                                                                                                                                                                                                                                                                      |                                                                                                                                                                                                                                                                                                                                                                                                                                           |   |     |   |    |   |   |   |   |   |   |   |   |   |   |   |   |   |   |   |   |    |    |
| 4   | 4                                                                                                      |                                                                                                                                                                                                                                                                                                                                                                      |                                                                                                                                                                                                                                                                                                                                                                                                                                           |   |     |   |    |   |   |   |   |   |   |   |   |   |   |   |   |   |   |   |   |    |    |
| 5   | 5                                                                                                      |                                                                                                                                                                                                                                                                                                                                                                      |                                                                                                                                                                                                                                                                                                                                                                                                                                           |   |     |   |    |   |   |   |   |   |   |   |   |   |   |   |   |   |   |   |   |    |    |
| 6   | 6                                                                                                      |                                                                                                                                                                                                                                                                                                                                                                      |                                                                                                                                                                                                                                                                                                                                                                                                                                           |   |     |   |    |   |   |   |   |   |   |   |   |   |   |   |   |   |   |   |   |    |    |
| 7   | 7                                                                                                      |                                                                                                                                                                                                                                                                                                                                                                      |                                                                                                                                                                                                                                                                                                                                                                                                                                           |   |     |   |    |   |   |   |   |   |   |   |   |   |   |   |   |   |   |   |   |    |    |
| 8   | 8                                                                                                      |                                                                                                                                                                                                                                                                                                                                                                      |                                                                                                                                                                                                                                                                                                                                                                                                                                           |   |     |   |    |   |   |   |   |   |   |   |   |   |   |   |   |   |   |   |   |    |    |
| 9   | 9                                                                                                      |                                                                                                                                                                                                                                                                                                                                                                      |                                                                                                                                                                                                                                                                                                                                                                                                                                           |   |     |   |    |   |   |   |   |   |   |   |   |   |   |   |   |   |   |   |   |    |    |
| 10  | 10                                                                                                     |                                                                                                                                                                                                                                                                                                                                                                      |                                                                                                                                                                                                                                                                                                                                                                                                                                           |   |     |   |    |   |   |   |   |   |   |   |   |   |   |   |   |   |   |   |   |    |    |

|     |                                            |                                                                                                                                                                                                                                                                                                                                                                                                      |                                                                                                                                                                     |   |            |   |            |   |          |
|-----|--------------------------------------------|------------------------------------------------------------------------------------------------------------------------------------------------------------------------------------------------------------------------------------------------------------------------------------------------------------------------------------------------------------------------------------------------------|---------------------------------------------------------------------------------------------------------------------------------------------------------------------|---|------------|---|------------|---|----------|
| 245 | di19                                       | 19. In the last 30 days, how many days did you inject any kind of drug?<br><br>U,K:di19ru, di19ruf1<br>M: di19ru, di19om, di19ruf1, di19omf1<br><i>Days</i>                                                                                                                                                                                                                                          | text (integer, Min: 0, Max: 30)                                                                                                                                     |   |            |   |            |   |          |
| 246 | di20<br>Show the field ONLY if: [di19] > 0 | 20. On days that you injected, on average, how many times did you inject per day?<br><br>U, K:di20ru, di20ruf1<br>M: M: di20ru, di20om, di20ruf1, di20omf1<br><i>Times per day</i>                                                                                                                                                                                                                   | text (integer, Min: 0, Max: 30)                                                                                                                                     |   |            |   |            |   |          |
| 247 | inject_freq                                | Injection frequency                                                                                                                                                                                                                                                                                                                                                                                  | calc<br>Calculation: [di19]*[di20]<br>Custom alignment: RH                                                                                                          |   |            |   |            |   |          |
| 248 | di21                                       | 21. Based on your response, you injected [inject_freq] times. Of these [inject_freq] times you injected, Please, move the adjustable bar to estimate approximately about how many times you shared (gave/received, lent, bought/sold) a needle or a syringe to another person after you USED it to inject in the past 30 days.<br><br>U, K:di21ru, di21ruf1<br>M: di21ru, di21om, di21ruf1, di21omf1 | slider<br>Slider labels: 0% None of the time, 50% About half of the time, 100% All of the time<br>Custom alignment: RV                                              |   |            |   |            |   |          |
| 249 | di22                                       | 22. Of these [inject_freq] times, please, move the adjustable bar to estimate approximately about how many times did you "share" common equipment for preparing your drug to inject in the last 30 days.<br><br>U,K:di22ru, di22ruf1<br>M: di22ru, di22om, di22ruf1, di22omf1                                                                                                                        | slider<br>Slider labels: 0% None of the time, 50% About half of the time, 100% All of the time<br>Custom alignment: RV                                              |   |            |   |            |   |          |
| 250 | di23                                       | 23. Please, move the adjustable bar to estimate approximately about how many times did you receive/ buy an already filled syringe that you later used to inject (i.e. you did not see how it was filled)?<br><br>U:di23ruf1                                                                                                                                                                          | slider<br>Slider labels: 0% None of the time, 50% About half of the time, 100% All of the time<br>Custom alignment: RV                                              |   |            |   |            |   |          |
| 251 | di24                                       | 24. Please, move the adjustable bar to estimate approximately about how many times did you use a syringe, filled by someone from his / her already used syringe (direct or reverse filling, several doses in one syringe)<br><br>U:di24ruf1                                                                                                                                                          | slider<br>Slider labels: 0% None of the time, 50% About half of the time, 100% All of the time<br>Custom alignment: RV                                              |   |            |   |            |   |          |
| 252 | inventory_of_drug_use_complete             | Section Header: <i>Form Status</i><br>Complete?                                                                                                                                                                                                                                                                                                                                                      | dropdown<br><table border="1"> <tr> <td>0</td> <td>Incomplete</td> </tr> <tr> <td>1</td> <td>Unverified</td> </tr> <tr> <td>2</td> <td>Complete</td> </tr> </table> | 0 | Incomplete | 1 | Unverified | 2 | Complete |
| 0   | Incomplete                                 |                                                                                                                                                                                                                                                                                                                                                                                                      |                                                                                                                                                                     |   |            |   |            |   |          |
| 1   | Unverified                                 |                                                                                                                                                                                                                                                                                                                                                                                                      |                                                                                                                                                                     |   |            |   |            |   |          |
| 2   | Complete                                   |                                                                                                                                                                                                                                                                                                                                                                                                      |                                                                                                                                                                     |   |            |   |            |   |          |

Instrument: **Overdose** (overdose)

[^ Collapse](#)

|     |          |                                                                                                                                                                                                                                                                                                                                                                                                                                                                                                                                                                                                                                                                                                                                   |             |
|-----|----------|-----------------------------------------------------------------------------------------------------------------------------------------------------------------------------------------------------------------------------------------------------------------------------------------------------------------------------------------------------------------------------------------------------------------------------------------------------------------------------------------------------------------------------------------------------------------------------------------------------------------------------------------------------------------------------------------------------------------------------------|-------------|
| 253 | od_intro | The next few questions will be about the drug overdose. By overdose we mean occurrence of such symptoms as very slow or shallow breathing or not breathing at all, very slow, faint pulse or no pulse at all, falling unconscious, black out, fainting, unconscious condition, blue lips, fingernails or toenails, pinpoint pupils, eyes rolled back, no response to shaking, calling your name, pain (deep sleep). These effects occur from using too much opioids. We are not asking about effects from using too much of other drugs like stimulants or alcohol (also you might also be using other drugs when it happens). We also are not asking about a "heavy nod", which is not an overdose. Based on this understanding: | descriptive |
|-----|----------|-----------------------------------------------------------------------------------------------------------------------------------------------------------------------------------------------------------------------------------------------------------------------------------------------------------------------------------------------------------------------------------------------------------------------------------------------------------------------------------------------------------------------------------------------------------------------------------------------------------------------------------------------------------------------------------------------------------------------------------|-------------|



|     |                                                                                            |                                                                                                                                                                                                                                   |                                                                                                                                                                                                                                            |   |                        |   |                                                                    |   |                |   |   |   |                   |
|-----|--------------------------------------------------------------------------------------------|-----------------------------------------------------------------------------------------------------------------------------------------------------------------------------------------------------------------------------------|--------------------------------------------------------------------------------------------------------------------------------------------------------------------------------------------------------------------------------------------|---|------------------------|---|--------------------------------------------------------------------|---|----------------|---|---|---|-------------------|
| 254 | od2<br>Show the field ONLY if:<br>[event] = '1'                                            | OD2. How many times have you experienced drug overdose during the last 6 months?<br>U, K: od2ru<br><i>times</i>                                                                                                                   | text (integer, Min: 0, Max: 20)                                                                                                                                                                                                            |   |                        |   |                                                                    |   |                |   |   |   |                   |
| 255 | od2_followup<br>Show the field ONLY if:<br>[event] = '3' or [event] = '4' or [event] = '5' | 2. How many times have you experienced drug overdose during the last 30 days?<br>U: od2ruf<br>M: od2ru1, od2om1                                                                                                                   | text (integer, Min: 0, Max: 10)                                                                                                                                                                                                            |   |                        |   |                                                                    |   |                |   |   |   |                   |
| 256 | od3<br>Show the field ONLY if:<br>[event] = '1'                                            | OD3. How many times did you witness someone experience a drug overdose during the last 6 months?<br>U, K:od3ru<br><i>times</i>                                                                                                    | text (integer, Min: 0, Max: 20)                                                                                                                                                                                                            |   |                        |   |                                                                    |   |                |   |   |   |                   |
| 257 | od3_followup<br>Show the field ONLY if:<br>[event] = '3' or [event] = '4' or [event] = '5' | 3. How many times did you witness someone experience a drug overdose during the last 30 days?<br>U: od3ruf<br>M: od3ru1, od3om1                                                                                                   | text (integer, Min: 0, Max: 20)                                                                                                                                                                                                            |   |                        |   |                                                                    |   |                |   |   |   |                   |
| 258 | od4<br>Show the field ONLY if:<br>[screen_arm_1][country] <> '3'                           | 4. Specify how you got the drugs that lead to overdose during the last 6 months? Did you receive the drugs from within prison or in another way? U: N/A K: od4_kyrru, 1 and 3 only (except there was somebody with 2 selected???) | radio<br><table border="1"> <tr> <td>1</td> <td>From within the prison</td> </tr> <tr> <td>2</td> <td>Inside the colony, but from another source (not from the obshchak)</td> </tr> <tr> <td>3</td> <td>From elsewhere</td> </tr> </table> | 1 | From within the prison | 2 | Inside the colony, but from another source (not from the obshchak) | 3 | From elsewhere |   |   |   |                   |
| 1   | From within the prison                                                                     |                                                                                                                                                                                                                                   |                                                                                                                                                                                                                                            |   |                        |   |                                                                    |   |                |   |   |   |                   |
| 2   | Inside the colony, but from another source (not from the obshchak)                         |                                                                                                                                                                                                                                   |                                                                                                                                                                                                                                            |   |                        |   |                                                                    |   |                |   |   |   |                   |
| 3   | From elsewhere                                                                             |                                                                                                                                                                                                                                   |                                                                                                                                                                                                                                            |   |                        |   |                                                                    |   |                |   |   |   |                   |
| 259 | od4a<br>Show the field ONLY if:<br>[od4] = '3'                                             | 4a. Specify where U: N/A, K: od4aru                                                                                                                                                                                               | text                                                                                                                                                                                                                                       |   |                        |   |                                                                    |   |                |   |   |   |                   |
| 260 | od5a<br>Show the field ONLY if:<br>[screen_arm_1][country] <> '3'                          | 5. How safe is it to use drugs received from within prison U: N/A, K:od5aru                                                                                                                                                       | radio<br><table border="1"> <tr> <td>1</td> <td>1 Very Unsafe</td> </tr> <tr> <td>2</td> <td>2</td> </tr> <tr> <td>3</td> <td>3</td> </tr> <tr> <td>4</td> <td>4</td> </tr> <tr> <td>5</td> <td>5 Completely Safe</td> </tr> </table>      | 1 | 1 Very Unsafe          | 2 | 2                                                                  | 3 | 3              | 4 | 4 | 5 | 5 Completely Safe |
| 1   | 1 Very Unsafe                                                                              |                                                                                                                                                                                                                                   |                                                                                                                                                                                                                                            |   |                        |   |                                                                    |   |                |   |   |   |                   |
| 2   | 2                                                                                          |                                                                                                                                                                                                                                   |                                                                                                                                                                                                                                            |   |                        |   |                                                                    |   |                |   |   |   |                   |
| 3   | 3                                                                                          |                                                                                                                                                                                                                                   |                                                                                                                                                                                                                                            |   |                        |   |                                                                    |   |                |   |   |   |                   |
| 4   | 4                                                                                          |                                                                                                                                                                                                                                   |                                                                                                                                                                                                                                            |   |                        |   |                                                                    |   |                |   |   |   |                   |
| 5   | 5 Completely Safe                                                                          |                                                                                                                                                                                                                                   |                                                                                                                                                                                                                                            |   |                        |   |                                                                    |   |                |   |   |   |                   |
| 261 | od5_kyr<br>Show the field ONLY if:<br>[screen_arm_1][country] = '2'                        | 5. How safe is it to use drugs received from Obshchak U: N/A, K:od5akyrru                                                                                                                                                         | radio<br><table border="1"> <tr> <td>1</td> <td>1 Very Unsafe</td> </tr> <tr> <td>2</td> <td>2</td> </tr> <tr> <td>3</td> <td>3</td> </tr> <tr> <td>4</td> <td>4</td> </tr> <tr> <td>5</td> <td>5 Completely Safe</td> </tr> </table>      | 1 | 1 Very Unsafe          | 2 | 2                                                                  | 3 | 3              | 4 | 4 | 5 | 5 Completely Safe |
| 1   | 1 Very Unsafe                                                                              |                                                                                                                                                                                                                                   |                                                                                                                                                                                                                                            |   |                        |   |                                                                    |   |                |   |   |   |                   |
| 2   | 2                                                                                          |                                                                                                                                                                                                                                   |                                                                                                                                                                                                                                            |   |                        |   |                                                                    |   |                |   |   |   |                   |
| 3   | 3                                                                                          |                                                                                                                                                                                                                                   |                                                                                                                                                                                                                                            |   |                        |   |                                                                    |   |                |   |   |   |                   |
| 4   | 4                                                                                          |                                                                                                                                                                                                                                   |                                                                                                                                                                                                                                            |   |                        |   |                                                                    |   |                |   |   |   |                   |
| 5   | 5 Completely Safe                                                                          |                                                                                                                                                                                                                                   |                                                                                                                                                                                                                                            |   |                        |   |                                                                    |   |                |   |   |   |                   |
| 262 | od5b<br>Show the field ONLY if:<br>[screen_arm_1][country] = '2'                           | 5b. How dangerous is it to take drugs obtained in a different way in the colony (not from the obshchak)? U: N/A, K:od5bkyrru                                                                                                      | radio<br><table border="1"> <tr> <td>1</td> <td>1 Very Unsafe</td> </tr> <tr> <td>2</td> <td>2</td> </tr> <tr> <td>3</td> <td>3</td> </tr> <tr> <td>4</td> <td>4</td> </tr> <tr> <td>5</td> <td>5 Completely Safe</td> </tr> </table>      | 1 | 1 Very Unsafe          | 2 | 2                                                                  | 3 | 3              | 4 | 4 | 5 | 5 Completely Safe |
| 1   | 1 Very Unsafe                                                                              |                                                                                                                                                                                                                                   |                                                                                                                                                                                                                                            |   |                        |   |                                                                    |   |                |   |   |   |                   |
| 2   | 2                                                                                          |                                                                                                                                                                                                                                   |                                                                                                                                                                                                                                            |   |                        |   |                                                                    |   |                |   |   |   |                   |
| 3   | 3                                                                                          |                                                                                                                                                                                                                                   |                                                                                                                                                                                                                                            |   |                        |   |                                                                    |   |                |   |   |   |                   |
| 4   | 4                                                                                          |                                                                                                                                                                                                                                   |                                                                                                                                                                                                                                            |   |                        |   |                                                                    |   |                |   |   |   |                   |
| 5   | 5 Completely Safe                                                                          |                                                                                                                                                                                                                                   |                                                                                                                                                                                                                                            |   |                        |   |                                                                    |   |                |   |   |   |                   |
| 263 | od5c<br>Show the field ONLY if:<br>[screen_arm_1][country] <> '3'                          | 5. How safe is it to use drugs obtained in the community? U: N/A, K:od5cru                                                                                                                                                        | radio<br><table border="1"> <tr> <td>1</td> <td>1 Very Unsafe</td> </tr> <tr> <td>2</td> <td>2</td> </tr> <tr> <td>3</td> <td>3</td> </tr> <tr> <td>4</td> <td>4</td> </tr> <tr> <td>5</td> <td>5 Completely Safe</td> </tr> </table>      | 1 | 1 Very Unsafe          | 2 | 2                                                                  | 3 | 3              | 4 | 4 | 5 | 5 Completely Safe |
| 1   | 1 Very Unsafe                                                                              |                                                                                                                                                                                                                                   |                                                                                                                                                                                                                                            |   |                        |   |                                                                    |   |                |   |   |   |                   |
| 2   | 2                                                                                          |                                                                                                                                                                                                                                   |                                                                                                                                                                                                                                            |   |                        |   |                                                                    |   |                |   |   |   |                   |
| 3   | 3                                                                                          |                                                                                                                                                                                                                                   |                                                                                                                                                                                                                                            |   |                        |   |                                                                    |   |                |   |   |   |                   |
| 4   | 4                                                                                          |                                                                                                                                                                                                                                   |                                                                                                                                                                                                                                            |   |                        |   |                                                                    |   |                |   |   |   |                   |
| 5   | 5 Completely Safe                                                                          |                                                                                                                                                                                                                                   |                                                                                                                                                                                                                                            |   |                        |   |                                                                    |   |                |   |   |   |                   |

|     |                   |                                                 |                                                                                                                                                            |   |            |   |            |   |          |
|-----|-------------------|-------------------------------------------------|------------------------------------------------------------------------------------------------------------------------------------------------------------|---|------------|---|------------|---|----------|
| 264 | overdose_complete | Section Header: <i>Form Status</i><br>Complete? | dropdown<br><table border="1"> <tr><td>0</td><td>Incomplete</td></tr> <tr><td>1</td><td>Unverified</td></tr> <tr><td>2</td><td>Complete</td></tr> </table> | 0 | Incomplete | 1 | Unverified | 2 | Complete |
| 0   | Incomplete        |                                                 |                                                                                                                                                            |   |            |   |            |   |          |
| 1   | Unverified        |                                                 |                                                                                                                                                            |   |            |   |            |   |          |
| 2   | Complete          |                                                 |                                                                                                                                                            |   |            |   |            |   |          |

Instrument: **Registration At State Narcology Service** (registration\_at\_state\_narcology\_service)

[^ Collapse](#)

|     |          |                                                                                                                                                                                                                                                                                                                                                                                                       |             |
|-----|----------|-------------------------------------------------------------------------------------------------------------------------------------------------------------------------------------------------------------------------------------------------------------------------------------------------------------------------------------------------------------------------------------------------------|-------------|
| 265 | reg_info | The next question will be about the registration at Narcology services. By registration we mean that you have officially been diagnosed with opioid dependence and registered at narcological dispensary. We need this information only for studying barriers and facilitators to OST entry and retention. This information is strictly confidential and will be used only for the research purposes. | descriptive |
|-----|----------|-------------------------------------------------------------------------------------------------------------------------------------------------------------------------------------------------------------------------------------------------------------------------------------------------------------------------------------------------------------------------------------------------------|-------------|

|     |                                                                             |                             |      |
|-----|-----------------------------------------------------------------------------|-----------------------------|------|
| 266 | rg_interviewer_id<br>Show the field ONLY if: [screen_arm_1][country] <> '3' | Interviewer ID: K: regintru | text |
|-----|-----------------------------------------------------------------------------|-----------------------------|------|

|     |                                                                             |                              |                 |
|-----|-----------------------------------------------------------------------------|------------------------------|-----------------|
| 267 | rg_interview_date<br>Show the field ONLY if: [screen_arm_1][country] <> '3' | Date of interview K: regdtru | text (date_mdy) |
|-----|-----------------------------------------------------------------------------|------------------------------|-----------------|

|     |                                                                |                                                                                           |                                                                                                                                                                                                                                                                                                                               |   |                                                        |   |                                                                |   |                                    |   |                 |
|-----|----------------------------------------------------------------|-------------------------------------------------------------------------------------------|-------------------------------------------------------------------------------------------------------------------------------------------------------------------------------------------------------------------------------------------------------------------------------------------------------------------------------|---|--------------------------------------------------------|---|----------------------------------------------------------------|---|------------------------------------|---|-----------------|
| 268 | rg1                                                            | Are you currently an "OFFICIALLY" registered patient at Narcology Service?<br>U, K: rg1ru | radio<br><table border="1"> <tr><td>1</td><td>Yes, I voluntarily got registered to help my addiction</td></tr> <tr><td>2</td><td>Yes, but I got registered only because the police forced me to</td></tr> <tr><td>3</td><td>No, I am definitely not registered</td></tr> <tr><td>4</td><td>Do not remember</td></tr> </table> | 1 | Yes, I voluntarily got registered to help my addiction | 2 | Yes, but I got registered only because the police forced me to | 3 | No, I am definitely not registered | 4 | Do not remember |
| 1   | Yes, I voluntarily got registered to help my addiction         |                                                                                           |                                                                                                                                                                                                                                                                                                                               |   |                                                        |   |                                                                |   |                                    |   |                 |
| 2   | Yes, but I got registered only because the police forced me to |                                                                                           |                                                                                                                                                                                                                                                                                                                               |   |                                                        |   |                                                                |   |                                    |   |                 |
| 3   | No, I am definitely not registered                             |                                                                                           |                                                                                                                                                                                                                                                                                                                               |   |                                                        |   |                                                                |   |                                    |   |                 |
| 4   | Do not remember                                                |                                                                                           |                                                                                                                                                                                                                                                                                                                               |   |                                                        |   |                                                                |   |                                    |   |                 |

|     |                                                  |                                                 |                                                                                                                                                            |   |            |   |            |   |          |
|-----|--------------------------------------------------|-------------------------------------------------|------------------------------------------------------------------------------------------------------------------------------------------------------------|---|------------|---|------------|---|----------|
| 269 | registration_at_state_narcology_service_complete | Section Header: <i>Form Status</i><br>Complete? | dropdown<br><table border="1"> <tr><td>0</td><td>Incomplete</td></tr> <tr><td>1</td><td>Unverified</td></tr> <tr><td>2</td><td>Complete</td></tr> </table> | 0 | Incomplete | 1 | Unverified | 2 | Complete |
| 0   | Incomplete                                       |                                                 |                                                                                                                                                            |   |            |   |            |   |          |
| 1   | Unverified                                       |                                                 |                                                                                                                                                            |   |            |   |            |   |          |
| 2   | Complete                                         |                                                 |                                                                                                                                                            |   |            |   |            |   |          |

Instrument: **Current Drug Dependency Treatment** (current\_drug\_dependency\_treatment)

[^ Collapse](#)

|     |             |                                                                                                                                                                                                                                                                                                                                                |             |
|-----|-------------|------------------------------------------------------------------------------------------------------------------------------------------------------------------------------------------------------------------------------------------------------------------------------------------------------------------------------------------------|-------------|
| 270 | dtinfo_curr | This next series of questions are going to ask about your current treatment from opioid dependence. By treatment we mean any kind of intervention (session, taking medications, and counseling) that you willingly or unwillingly is participating in. All information is strictly confidential and will be used only for scientific purposes. | descriptive |
|-----|-------------|------------------------------------------------------------------------------------------------------------------------------------------------------------------------------------------------------------------------------------------------------------------------------------------------------------------------------------------------|-------------|

|     |      |                                                                                                                      |                                                                                                     |   |     |   |    |
|-----|------|----------------------------------------------------------------------------------------------------------------------|-----------------------------------------------------------------------------------------------------|---|-----|---|----|
| 271 | dt12 | DT12. Are you currently receiving any kind of treatment for your opioid dependence?<br>RECODE 2 to 0<br>U, K: dt12ru | radio<br><table border="1"> <tr><td>1</td><td>Yes</td></tr> <tr><td>0</td><td>No</td></tr> </table> | 1 | Yes | 0 | No |
| 1   | Yes  |                                                                                                                      |                                                                                                     |   |     |   |    |
| 0   | No   |                                                                                                                      |                                                                                                     |   |     |   |    |

|                                                                                                   |                                                                                             |                                                                                                                                                                                                                                                                                                                                                                                                 |                                                                                                                                                                                                                                                                                                                                                                                                                                                                                                                                                                                                                                                                                                                                                                                                                                                |   |            |                        |            |         |                             |   |         |                                                                           |   |         |                                                        |   |         |                                                                          |   |         |                                        |   |         |                        |   |         |                                                                        |
|---------------------------------------------------------------------------------------------------|---------------------------------------------------------------------------------------------|-------------------------------------------------------------------------------------------------------------------------------------------------------------------------------------------------------------------------------------------------------------------------------------------------------------------------------------------------------------------------------------------------|------------------------------------------------------------------------------------------------------------------------------------------------------------------------------------------------------------------------------------------------------------------------------------------------------------------------------------------------------------------------------------------------------------------------------------------------------------------------------------------------------------------------------------------------------------------------------------------------------------------------------------------------------------------------------------------------------------------------------------------------------------------------------------------------------------------------------------------------|---|------------|------------------------|------------|---------|-----------------------------|---|---------|---------------------------------------------------------------------------|---|---------|--------------------------------------------------------|---|---------|--------------------------------------------------------------------------|---|---------|----------------------------------------|---|---------|------------------------|---|---------|------------------------------------------------------------------------|
| 272                                                                                               | <p>dt13</p> <p>Show the field ONLY if: [dt12]='1'</p>                                       | <p>13. Which treatment for opioid dependence are you currently receiving? [check all that apply]</p> <p>U, K: dt13ru</p>                                                                                                                                                                                                                                                                        | <p>checkbox</p> <table border="1"> <tr> <td>1</td> <td>dt13__1</td> <td>Detoxification [detox]</td> </tr> <tr> <td>2</td> <td>dt13__2</td> <td>Rehabilitation (counseling)</td> </tr> <tr> <td>3</td> <td>dt13__3</td> <td>Abstinence therapeutic community (for example: work camp, religious camp)</td> </tr> <tr> <td>4</td> <td>dt13__4</td> <td>Psychotherapy and counseling (no medications provided)</td> </tr> <tr> <td>5</td> <td>dt13__5</td> <td>Treatment in psychiatric hospital with psychotropic medications provided</td> </tr> <tr> <td>6</td> <td>dt13__6</td> <td>Harm reduction program (excluding OST)</td> </tr> <tr> <td>7</td> <td>dt13__7</td> <td>Other (enter)<br/>_____</td> </tr> <tr> <td>8</td> <td>dt13__8</td> <td>Opioid substitution treatment ( with buprenorphine or methadone)(Kyrg)</td> </tr> </table> | 1 | dt13__1    | Detoxification [detox] | 2          | dt13__2 | Rehabilitation (counseling) | 3 | dt13__3 | Abstinence therapeutic community (for example: work camp, religious camp) | 4 | dt13__4 | Psychotherapy and counseling (no medications provided) | 5 | dt13__5 | Treatment in psychiatric hospital with psychotropic medications provided | 6 | dt13__6 | Harm reduction program (excluding OST) | 7 | dt13__7 | Other (enter)<br>_____ | 8 | dt13__8 | Opioid substitution treatment ( with buprenorphine or methadone)(Kyrg) |
| 1                                                                                                 | dt13__1                                                                                     | Detoxification [detox]                                                                                                                                                                                                                                                                                                                                                                          |                                                                                                                                                                                                                                                                                                                                                                                                                                                                                                                                                                                                                                                                                                                                                                                                                                                |   |            |                        |            |         |                             |   |         |                                                                           |   |         |                                                        |   |         |                                                                          |   |         |                                        |   |         |                        |   |         |                                                                        |
| 2                                                                                                 | dt13__2                                                                                     | Rehabilitation (counseling)                                                                                                                                                                                                                                                                                                                                                                     |                                                                                                                                                                                                                                                                                                                                                                                                                                                                                                                                                                                                                                                                                                                                                                                                                                                |   |            |                        |            |         |                             |   |         |                                                                           |   |         |                                                        |   |         |                                                                          |   |         |                                        |   |         |                        |   |         |                                                                        |
| 3                                                                                                 | dt13__3                                                                                     | Abstinence therapeutic community (for example: work camp, religious camp)                                                                                                                                                                                                                                                                                                                       |                                                                                                                                                                                                                                                                                                                                                                                                                                                                                                                                                                                                                                                                                                                                                                                                                                                |   |            |                        |            |         |                             |   |         |                                                                           |   |         |                                                        |   |         |                                                                          |   |         |                                        |   |         |                        |   |         |                                                                        |
| 4                                                                                                 | dt13__4                                                                                     | Psychotherapy and counseling (no medications provided)                                                                                                                                                                                                                                                                                                                                          |                                                                                                                                                                                                                                                                                                                                                                                                                                                                                                                                                                                                                                                                                                                                                                                                                                                |   |            |                        |            |         |                             |   |         |                                                                           |   |         |                                                        |   |         |                                                                          |   |         |                                        |   |         |                        |   |         |                                                                        |
| 5                                                                                                 | dt13__5                                                                                     | Treatment in psychiatric hospital with psychotropic medications provided                                                                                                                                                                                                                                                                                                                        |                                                                                                                                                                                                                                                                                                                                                                                                                                                                                                                                                                                                                                                                                                                                                                                                                                                |   |            |                        |            |         |                             |   |         |                                                                           |   |         |                                                        |   |         |                                                                          |   |         |                                        |   |         |                        |   |         |                                                                        |
| 6                                                                                                 | dt13__6                                                                                     | Harm reduction program (excluding OST)                                                                                                                                                                                                                                                                                                                                                          |                                                                                                                                                                                                                                                                                                                                                                                                                                                                                                                                                                                                                                                                                                                                                                                                                                                |   |            |                        |            |         |                             |   |         |                                                                           |   |         |                                                        |   |         |                                                                          |   |         |                                        |   |         |                        |   |         |                                                                        |
| 7                                                                                                 | dt13__7                                                                                     | Other (enter)<br>_____                                                                                                                                                                                                                                                                                                                                                                          |                                                                                                                                                                                                                                                                                                                                                                                                                                                                                                                                                                                                                                                                                                                                                                                                                                                |   |            |                        |            |         |                             |   |         |                                                                           |   |         |                                                        |   |         |                                                                          |   |         |                                        |   |         |                        |   |         |                                                                        |
| 8                                                                                                 | dt13__8                                                                                     | Opioid substitution treatment ( with buprenorphine or methadone)(Kyrg)                                                                                                                                                                                                                                                                                                                          |                                                                                                                                                                                                                                                                                                                                                                                                                                                                                                                                                                                                                                                                                                                                                                                                                                                |   |            |                        |            |         |                             |   |         |                                                                           |   |         |                                                        |   |         |                                                                          |   |         |                                        |   |         |                        |   |         |                                                                        |
| 273                                                                                               | <p>dt13o</p> <p>Show the field ONLY if: [dt13(7)] = '1'</p>                                 | <p>Specify Other:</p> <p>U, K: dt13oru</p>                                                                                                                                                                                                                                                                                                                                                      | text                                                                                                                                                                                                                                                                                                                                                                                                                                                                                                                                                                                                                                                                                                                                                                                                                                           |   |            |                        |            |         |                             |   |         |                                                                           |   |         |                                                        |   |         |                                                                          |   |         |                                        |   |         |                        |   |         |                                                                        |
| 274                                                                                               | <p>dt14yrs</p> <p>Show the field ONLY if: [dt12]='1'</p>                                    | <p>14. How long have you been receiving your current treatment (if you receive several treatments, please indicate time regarding the most important type of treatment for you)?</p> <p>U, K: dt14yrsru</p> <p><i>Years</i></p>                                                                                                                                                                 | text (integer)                                                                                                                                                                                                                                                                                                                                                                                                                                                                                                                                                                                                                                                                                                                                                                                                                                 |   |            |                        |            |         |                             |   |         |                                                                           |   |         |                                                        |   |         |                                                                          |   |         |                                        |   |         |                        |   |         |                                                                        |
| 275                                                                                               | <p>dt14mos</p> <p>Show the field ONLY if: [dt12] = '1'</p>                                  | <p>DT14 Months:</p> <p>U, K: dt14mosru</p> <p><i>Months</i></p>                                                                                                                                                                                                                                                                                                                                 | text (integer)                                                                                                                                                                                                                                                                                                                                                                                                                                                                                                                                                                                                                                                                                                                                                                                                                                 |   |            |                        |            |         |                             |   |         |                                                                           |   |         |                                                        |   |         |                                                                          |   |         |                                        |   |         |                        |   |         |                                                                        |
| 276                                                                                               | <p>dt14days</p> <p>Show the field ONLY if: [dt12] = '1' and [screen_arm_1][country]='2'</p> | <p>DT14 Days:</p> <p>U: N/A, K: dt14daysru</p> <p><i>Months</i></p>                                                                                                                                                                                                                                                                                                                             | text (integer)                                                                                                                                                                                                                                                                                                                                                                                                                                                                                                                                                                                                                                                                                                                                                                                                                                 |   |            |                        |            |         |                             |   |         |                                                                           |   |         |                                                        |   |         |                                                                          |   |         |                                        |   |         |                        |   |         |                                                                        |
| 277                                                                                               | <p>dt14a</p> <p>Show the field ONLY if: [dt12] = '1'</p>                                    | <p>14a. Indicate the type of treatment</p> <p>U, K: dt14aru</p>                                                                                                                                                                                                                                                                                                                                 | text                                                                                                                                                                                                                                                                                                                                                                                                                                                                                                                                                                                                                                                                                                                                                                                                                                           |   |            |                        |            |         |                             |   |         |                                                                           |   |         |                                                        |   |         |                                                                          |   |         |                                        |   |         |                        |   |         |                                                                        |
| 278                                                                                               | <p>current_drug_dependency_treatment_complete</p>                                           | <p>Section Header: <i>Form Status</i></p> <p>Complete?</p>                                                                                                                                                                                                                                                                                                                                      | <p>dropdown</p> <table border="1"> <tr> <td>0</td> <td>Incomplete</td> </tr> <tr> <td>1</td> <td>Unverified</td> </tr> <tr> <td>2</td> <td>Complete</td> </tr> </table>                                                                                                                                                                                                                                                                                                                                                                                                                                                                                                                                                                                                                                                                        | 0 | Incomplete | 1                      | Unverified | 2       | Complete                    |   |         |                                                                           |   |         |                                                        |   |         |                                                                          |   |         |                                        |   |         |                        |   |         |                                                                        |
| 0                                                                                                 | Incomplete                                                                                  |                                                                                                                                                                                                                                                                                                                                                                                                 |                                                                                                                                                                                                                                                                                                                                                                                                                                                                                                                                                                                                                                                                                                                                                                                                                                                |   |            |                        |            |         |                             |   |         |                                                                           |   |         |                                                        |   |         |                                                                          |   |         |                                        |   |         |                        |   |         |                                                                        |
| 1                                                                                                 | Unverified                                                                                  |                                                                                                                                                                                                                                                                                                                                                                                                 |                                                                                                                                                                                                                                                                                                                                                                                                                                                                                                                                                                                                                                                                                                                                                                                                                                                |   |            |                        |            |         |                             |   |         |                                                                           |   |         |                                                        |   |         |                                                                          |   |         |                                        |   |         |                        |   |         |                                                                        |
| 2                                                                                                 | Complete                                                                                    |                                                                                                                                                                                                                                                                                                                                                                                                 |                                                                                                                                                                                                                                                                                                                                                                                                                                                                                                                                                                                                                                                                                                                                                                                                                                                |   |            |                        |            |         |                             |   |         |                                                                           |   |         |                                                        |   |         |                                                                          |   |         |                                        |   |         |                        |   |         |                                                                        |
| <p>Instrument: <b>Treatment Effectiveness Assessment</b> (treatment_effectiveness_assessment)</p> |                                                                                             |                                                                                                                                                                                                                                                                                                                                                                                                 | <p><a href="#">^ Collapse</a></p>                                                                                                                                                                                                                                                                                                                                                                                                                                                                                                                                                                                                                                                                                                                                                                                                              |   |            |                        |            |         |                             |   |         |                                                                           |   |         |                                                        |   |         |                                                                          |   |         |                                        |   |         |                        |   |         |                                                                        |
| 279                                                                                               | tealabel                                                                                    | <p>The TEA asks you to express the extent of changes for the better from your involvement in the program to this point (or how things are if it's your first TEA or baseline). For each area, think about how things have become better and circle the results on the scale below: the more you have improved, the higher the number - from 1 (not better at all) to 10 (very much better).</p> | descriptive                                                                                                                                                                                                                                                                                                                                                                                                                                                                                                                                                                                                                                                                                                                                                                                                                                    |   |            |                        |            |         |                             |   |         |                                                                           |   |         |                                                        |   |         |                                                                          |   |         |                                        |   |         |                        |   |         |                                                                        |

|     |                                                                           |                                                                                                                                                                                                                                                                                    |                                                                                                                                                                                                                                                                                                                                                                                                     |   |                    |   |   |   |   |   |   |   |          |   |   |   |   |   |   |   |   |    |                |
|-----|---------------------------------------------------------------------------|------------------------------------------------------------------------------------------------------------------------------------------------------------------------------------------------------------------------------------------------------------------------------------|-----------------------------------------------------------------------------------------------------------------------------------------------------------------------------------------------------------------------------------------------------------------------------------------------------------------------------------------------------------------------------------------------------|---|--------------------|---|---|---|---|---|---|---|----------|---|---|---|---|---|---|---|---|----|----------------|
| 280 | <p>tea_su</p> <p>Show the field ONLY if:<br/>[current_on_oat] = 1</p>     | <p>Substance use: How much better are you with drug and alcohol use? Consider the frequency and amount of use, money spent on drugs, amount of drug craving, time spent being loaded, being sick, in trouble and in other drug-using activities, etc. U, K: tea_suru</p>           | <p>radio (Matrix)</p> <table border="1"> <tr><td>1</td><td>1 None or not much</td></tr> <tr><td>2</td><td>2</td></tr> <tr><td>3</td><td>3</td></tr> <tr><td>4</td><td>4</td></tr> <tr><td>5</td><td>5 Better</td></tr> <tr><td>6</td><td>6</td></tr> <tr><td>7</td><td>7</td></tr> <tr><td>8</td><td>8</td></tr> <tr><td>9</td><td>9</td></tr> <tr><td>10</td><td>10 Much better</td></tr> </table> | 1 | 1 None or not much | 2 | 2 | 3 | 3 | 4 | 4 | 5 | 5 Better | 6 | 6 | 7 | 7 | 8 | 8 | 9 | 9 | 10 | 10 Much better |
| 1   | 1 None or not much                                                        |                                                                                                                                                                                                                                                                                    |                                                                                                                                                                                                                                                                                                                                                                                                     |   |                    |   |   |   |   |   |   |   |          |   |   |   |   |   |   |   |   |    |                |
| 2   | 2                                                                         |                                                                                                                                                                                                                                                                                    |                                                                                                                                                                                                                                                                                                                                                                                                     |   |                    |   |   |   |   |   |   |   |          |   |   |   |   |   |   |   |   |    |                |
| 3   | 3                                                                         |                                                                                                                                                                                                                                                                                    |                                                                                                                                                                                                                                                                                                                                                                                                     |   |                    |   |   |   |   |   |   |   |          |   |   |   |   |   |   |   |   |    |                |
| 4   | 4                                                                         |                                                                                                                                                                                                                                                                                    |                                                                                                                                                                                                                                                                                                                                                                                                     |   |                    |   |   |   |   |   |   |   |          |   |   |   |   |   |   |   |   |    |                |
| 5   | 5 Better                                                                  |                                                                                                                                                                                                                                                                                    |                                                                                                                                                                                                                                                                                                                                                                                                     |   |                    |   |   |   |   |   |   |   |          |   |   |   |   |   |   |   |   |    |                |
| 6   | 6                                                                         |                                                                                                                                                                                                                                                                                    |                                                                                                                                                                                                                                                                                                                                                                                                     |   |                    |   |   |   |   |   |   |   |          |   |   |   |   |   |   |   |   |    |                |
| 7   | 7                                                                         |                                                                                                                                                                                                                                                                                    |                                                                                                                                                                                                                                                                                                                                                                                                     |   |                    |   |   |   |   |   |   |   |          |   |   |   |   |   |   |   |   |    |                |
| 8   | 8                                                                         |                                                                                                                                                                                                                                                                                    |                                                                                                                                                                                                                                                                                                                                                                                                     |   |                    |   |   |   |   |   |   |   |          |   |   |   |   |   |   |   |   |    |                |
| 9   | 9                                                                         |                                                                                                                                                                                                                                                                                    |                                                                                                                                                                                                                                                                                                                                                                                                     |   |                    |   |   |   |   |   |   |   |          |   |   |   |   |   |   |   |   |    |                |
| 10  | 10 Much better                                                            |                                                                                                                                                                                                                                                                                    |                                                                                                                                                                                                                                                                                                                                                                                                     |   |                    |   |   |   |   |   |   |   |          |   |   |   |   |   |   |   |   |    |                |
| 281 | <p>tea_health</p> <p>Show the field ONLY if:<br/>[current_on_oat] = 1</p> | <p>Health: Has your health improved? In what way and how much? Think about your physical and mental health: Are you eating and sleeping properly, exercising, taking care of health problems or dental problems, feeling better about yourself, etc? U, K: tea_healthru</p>        | <p>radio (Matrix)</p> <table border="1"> <tr><td>1</td><td>1 None or not much</td></tr> <tr><td>2</td><td>2</td></tr> <tr><td>3</td><td>3</td></tr> <tr><td>4</td><td>4</td></tr> <tr><td>5</td><td>5 Better</td></tr> <tr><td>6</td><td>6</td></tr> <tr><td>7</td><td>7</td></tr> <tr><td>8</td><td>8</td></tr> <tr><td>9</td><td>9</td></tr> <tr><td>10</td><td>10 Much better</td></tr> </table> | 1 | 1 None or not much | 2 | 2 | 3 | 3 | 4 | 4 | 5 | 5 Better | 6 | 6 | 7 | 7 | 8 | 8 | 9 | 9 | 10 | 10 Much better |
| 1   | 1 None or not much                                                        |                                                                                                                                                                                                                                                                                    |                                                                                                                                                                                                                                                                                                                                                                                                     |   |                    |   |   |   |   |   |   |   |          |   |   |   |   |   |   |   |   |    |                |
| 2   | 2                                                                         |                                                                                                                                                                                                                                                                                    |                                                                                                                                                                                                                                                                                                                                                                                                     |   |                    |   |   |   |   |   |   |   |          |   |   |   |   |   |   |   |   |    |                |
| 3   | 3                                                                         |                                                                                                                                                                                                                                                                                    |                                                                                                                                                                                                                                                                                                                                                                                                     |   |                    |   |   |   |   |   |   |   |          |   |   |   |   |   |   |   |   |    |                |
| 4   | 4                                                                         |                                                                                                                                                                                                                                                                                    |                                                                                                                                                                                                                                                                                                                                                                                                     |   |                    |   |   |   |   |   |   |   |          |   |   |   |   |   |   |   |   |    |                |
| 5   | 5 Better                                                                  |                                                                                                                                                                                                                                                                                    |                                                                                                                                                                                                                                                                                                                                                                                                     |   |                    |   |   |   |   |   |   |   |          |   |   |   |   |   |   |   |   |    |                |
| 6   | 6                                                                         |                                                                                                                                                                                                                                                                                    |                                                                                                                                                                                                                                                                                                                                                                                                     |   |                    |   |   |   |   |   |   |   |          |   |   |   |   |   |   |   |   |    |                |
| 7   | 7                                                                         |                                                                                                                                                                                                                                                                                    |                                                                                                                                                                                                                                                                                                                                                                                                     |   |                    |   |   |   |   |   |   |   |          |   |   |   |   |   |   |   |   |    |                |
| 8   | 8                                                                         |                                                                                                                                                                                                                                                                                    |                                                                                                                                                                                                                                                                                                                                                                                                     |   |                    |   |   |   |   |   |   |   |          |   |   |   |   |   |   |   |   |    |                |
| 9   | 9                                                                         |                                                                                                                                                                                                                                                                                    |                                                                                                                                                                                                                                                                                                                                                                                                     |   |                    |   |   |   |   |   |   |   |          |   |   |   |   |   |   |   |   |    |                |
| 10  | 10 Much better                                                            |                                                                                                                                                                                                                                                                                    |                                                                                                                                                                                                                                                                                                                                                                                                     |   |                    |   |   |   |   |   |   |   |          |   |   |   |   |   |   |   |   |    |                |
| 282 | <p>tea_life</p> <p>Show the field ONLY if:<br/>[current_on_oat] = 1</p>   | <p>Lifestyle: How much better are you in taking care of personal responsibilities? Think about your living conditions, family situation, employment, relationships: Are you paying your bills? Following through with your personal or professional commitments? U: tea_liferu</p> | <p>radio (Matrix)</p> <table border="1"> <tr><td>1</td><td>1 None or not much</td></tr> <tr><td>2</td><td>2</td></tr> <tr><td>3</td><td>3</td></tr> <tr><td>4</td><td>4</td></tr> <tr><td>5</td><td>5 Better</td></tr> <tr><td>6</td><td>6</td></tr> <tr><td>7</td><td>7</td></tr> <tr><td>8</td><td>8</td></tr> <tr><td>9</td><td>9</td></tr> <tr><td>10</td><td>10 Much better</td></tr> </table> | 1 | 1 None or not much | 2 | 2 | 3 | 3 | 4 | 4 | 5 | 5 Better | 6 | 6 | 7 | 7 | 8 | 8 | 9 | 9 | 10 | 10 Much better |
| 1   | 1 None or not much                                                        |                                                                                                                                                                                                                                                                                    |                                                                                                                                                                                                                                                                                                                                                                                                     |   |                    |   |   |   |   |   |   |   |          |   |   |   |   |   |   |   |   |    |                |
| 2   | 2                                                                         |                                                                                                                                                                                                                                                                                    |                                                                                                                                                                                                                                                                                                                                                                                                     |   |                    |   |   |   |   |   |   |   |          |   |   |   |   |   |   |   |   |    |                |
| 3   | 3                                                                         |                                                                                                                                                                                                                                                                                    |                                                                                                                                                                                                                                                                                                                                                                                                     |   |                    |   |   |   |   |   |   |   |          |   |   |   |   |   |   |   |   |    |                |
| 4   | 4                                                                         |                                                                                                                                                                                                                                                                                    |                                                                                                                                                                                                                                                                                                                                                                                                     |   |                    |   |   |   |   |   |   |   |          |   |   |   |   |   |   |   |   |    |                |
| 5   | 5 Better                                                                  |                                                                                                                                                                                                                                                                                    |                                                                                                                                                                                                                                                                                                                                                                                                     |   |                    |   |   |   |   |   |   |   |          |   |   |   |   |   |   |   |   |    |                |
| 6   | 6                                                                         |                                                                                                                                                                                                                                                                                    |                                                                                                                                                                                                                                                                                                                                                                                                     |   |                    |   |   |   |   |   |   |   |          |   |   |   |   |   |   |   |   |    |                |
| 7   | 7                                                                         |                                                                                                                                                                                                                                                                                    |                                                                                                                                                                                                                                                                                                                                                                                                     |   |                    |   |   |   |   |   |   |   |          |   |   |   |   |   |   |   |   |    |                |
| 8   | 8                                                                         |                                                                                                                                                                                                                                                                                    |                                                                                                                                                                                                                                                                                                                                                                                                     |   |                    |   |   |   |   |   |   |   |          |   |   |   |   |   |   |   |   |    |                |
| 9   | 9                                                                         |                                                                                                                                                                                                                                                                                    |                                                                                                                                                                                                                                                                                                                                                                                                     |   |                    |   |   |   |   |   |   |   |          |   |   |   |   |   |   |   |   |    |                |
| 10  | 10 Much better                                                            |                                                                                                                                                                                                                                                                                    |                                                                                                                                                                                                                                                                                                                                                                                                     |   |                    |   |   |   |   |   |   |   |          |   |   |   |   |   |   |   |   |    |                |
| 283 | <p>tea_com</p> <p>Show the field ONLY if:<br/>[current_on_oat] = 1</p>    | <p>Community: Are you a better member of the community? Think about things like obeying laws and meeting your responsibilities to society: Do your actions have positive or negative impacts on other people? U, K: tea_comru</p>                                                  | <p>radio (Matrix)</p> <table border="1"> <tr><td>1</td><td>1 None or not much</td></tr> <tr><td>2</td><td>2</td></tr> <tr><td>3</td><td>3</td></tr> <tr><td>4</td><td>4</td></tr> <tr><td>5</td><td>5 Better</td></tr> <tr><td>6</td><td>6</td></tr> <tr><td>7</td><td>7</td></tr> <tr><td>8</td><td>8</td></tr> <tr><td>9</td><td>9</td></tr> <tr><td>10</td><td>10 Much better</td></tr> </table> | 1 | 1 None or not much | 2 | 2 | 3 | 3 | 4 | 4 | 5 | 5 Better | 6 | 6 | 7 | 7 | 8 | 8 | 9 | 9 | 10 | 10 Much better |
| 1   | 1 None or not much                                                        |                                                                                                                                                                                                                                                                                    |                                                                                                                                                                                                                                                                                                                                                                                                     |   |                    |   |   |   |   |   |   |   |          |   |   |   |   |   |   |   |   |    |                |
| 2   | 2                                                                         |                                                                                                                                                                                                                                                                                    |                                                                                                                                                                                                                                                                                                                                                                                                     |   |                    |   |   |   |   |   |   |   |          |   |   |   |   |   |   |   |   |    |                |
| 3   | 3                                                                         |                                                                                                                                                                                                                                                                                    |                                                                                                                                                                                                                                                                                                                                                                                                     |   |                    |   |   |   |   |   |   |   |          |   |   |   |   |   |   |   |   |    |                |
| 4   | 4                                                                         |                                                                                                                                                                                                                                                                                    |                                                                                                                                                                                                                                                                                                                                                                                                     |   |                    |   |   |   |   |   |   |   |          |   |   |   |   |   |   |   |   |    |                |
| 5   | 5 Better                                                                  |                                                                                                                                                                                                                                                                                    |                                                                                                                                                                                                                                                                                                                                                                                                     |   |                    |   |   |   |   |   |   |   |          |   |   |   |   |   |   |   |   |    |                |
| 6   | 6                                                                         |                                                                                                                                                                                                                                                                                    |                                                                                                                                                                                                                                                                                                                                                                                                     |   |                    |   |   |   |   |   |   |   |          |   |   |   |   |   |   |   |   |    |                |
| 7   | 7                                                                         |                                                                                                                                                                                                                                                                                    |                                                                                                                                                                                                                                                                                                                                                                                                     |   |                    |   |   |   |   |   |   |   |          |   |   |   |   |   |   |   |   |    |                |
| 8   | 8                                                                         |                                                                                                                                                                                                                                                                                    |                                                                                                                                                                                                                                                                                                                                                                                                     |   |                    |   |   |   |   |   |   |   |          |   |   |   |   |   |   |   |   |    |                |
| 9   | 9                                                                         |                                                                                                                                                                                                                                                                                    |                                                                                                                                                                                                                                                                                                                                                                                                     |   |                    |   |   |   |   |   |   |   |          |   |   |   |   |   |   |   |   |    |                |
| 10  | 10 Much better                                                            |                                                                                                                                                                                                                                                                                    |                                                                                                                                                                                                                                                                                                                                                                                                     |   |                    |   |   |   |   |   |   |   |          |   |   |   |   |   |   |   |   |    |                |
| 284 | tea_notes                                                                 | Comments/Notes K: N/A                                                                                                                                                                                                                                                              | notes                                                                                                                                                                                                                                                                                                                                                                                               |   |                    |   |   |   |   |   |   |   |          |   |   |   |   |   |   |   |   |    |                |

|                                                                                                        |                                             |                                                                                                                                                                          |                                                                                                                                                                                                                                      |   |                     |   |            |   |          |   |   |   |                  |
|--------------------------------------------------------------------------------------------------------|---------------------------------------------|--------------------------------------------------------------------------------------------------------------------------------------------------------------------------|--------------------------------------------------------------------------------------------------------------------------------------------------------------------------------------------------------------------------------------|---|---------------------|---|------------|---|----------|---|---|---|------------------|
| 285                                                                                                    | treatment_effectiveness_assessment_complete | Section Header: <i>Form Status</i><br>Complete?                                                                                                                          | dropdown<br><table border="1"> <tr><td>0</td><td>Incomplete</td></tr> <tr><td>1</td><td>Unverified</td></tr> <tr><td>2</td><td>Complete</td></tr> </table>                                                                           | 0 | Incomplete          | 1 | Unverified | 2 | Complete |   |   |   |                  |
| 0                                                                                                      | Incomplete                                  |                                                                                                                                                                          |                                                                                                                                                                                                                                      |   |                     |   |            |   |          |   |   |   |                  |
| 1                                                                                                      | Unverified                                  |                                                                                                                                                                          |                                                                                                                                                                                                                                      |   |                     |   |            |   |          |   |   |   |                  |
| 2                                                                                                      | Complete                                    |                                                                                                                                                                          |                                                                                                                                                                                                                                      |   |                     |   |            |   |          |   |   |   |                  |
| Instrument: <b>Attitudes Toward And Knowledge About Ost</b> (attitudes_toward_and_knowledge_about_ost) |                                             |                                                                                                                                                                          | <a href="#">^ Collapse</a>                                                                                                                                                                                                           |   |                     |   |            |   |          |   |   |   |                  |
| 286                                                                                                    | caslabel                                    | To what extent do you agree or disagree with the following statements? Check the box that best corresponds.                                                              | descriptive                                                                                                                                                                                                                          |   |                     |   |            |   |          |   |   |   |                  |
| 287                                                                                                    | ost1                                        | 1. OST services should be available in the community so that all people who suffer from opioid addiction and OST can receive it. U, K: ost1ru                            | radio (Matrix)<br><table border="1"> <tr><td>1</td><td>1 Strongly disagree</td></tr> <tr><td>2</td><td>2</td></tr> <tr><td>3</td><td>3</td></tr> <tr><td>4</td><td>4</td></tr> <tr><td>5</td><td>5 Strongly agree</td></tr> </table> | 1 | 1 Strongly disagree | 2 | 2          | 3 | 3        | 4 | 4 | 5 | 5 Strongly agree |
| 1                                                                                                      | 1 Strongly disagree                         |                                                                                                                                                                          |                                                                                                                                                                                                                                      |   |                     |   |            |   |          |   |   |   |                  |
| 2                                                                                                      | 2                                           |                                                                                                                                                                          |                                                                                                                                                                                                                                      |   |                     |   |            |   |          |   |   |   |                  |
| 3                                                                                                      | 3                                           |                                                                                                                                                                          |                                                                                                                                                                                                                                      |   |                     |   |            |   |          |   |   |   |                  |
| 4                                                                                                      | 4                                           |                                                                                                                                                                          |                                                                                                                                                                                                                                      |   |                     |   |            |   |          |   |   |   |                  |
| 5                                                                                                      | 5 Strongly agree                            |                                                                                                                                                                          |                                                                                                                                                                                                                                      |   |                     |   |            |   |          |   |   |   |                  |
| 288                                                                                                    | ost2                                        | 2. OST services should be introduced into prisons so that all inmates who suffer from opioid addiction and want opioid substitution therapy can receive it. U, K: ost2ru | radio (Matrix)<br><table border="1"> <tr><td>1</td><td>1 Strongly disagree</td></tr> <tr><td>2</td><td>2</td></tr> <tr><td>3</td><td>3</td></tr> <tr><td>4</td><td>4</td></tr> <tr><td>5</td><td>5 Strongly agree</td></tr> </table> | 1 | 1 Strongly disagree | 2 | 2          | 3 | 3        | 4 | 4 | 5 | 5 Strongly agree |
| 1                                                                                                      | 1 Strongly disagree                         |                                                                                                                                                                          |                                                                                                                                                                                                                                      |   |                     |   |            |   |          |   |   |   |                  |
| 2                                                                                                      | 2                                           |                                                                                                                                                                          |                                                                                                                                                                                                                                      |   |                     |   |            |   |          |   |   |   |                  |
| 3                                                                                                      | 3                                           |                                                                                                                                                                          |                                                                                                                                                                                                                                      |   |                     |   |            |   |          |   |   |   |                  |
| 4                                                                                                      | 4                                           |                                                                                                                                                                          |                                                                                                                                                                                                                                      |   |                     |   |            |   |          |   |   |   |                  |
| 5                                                                                                      | 5 Strongly agree                            |                                                                                                                                                                          |                                                                                                                                                                                                                                      |   |                     |   |            |   |          |   |   |   |                  |
| 289                                                                                                    | ost3                                        | 3. For people who have opioid addiction, it would be much better to treat them with buprenorphine rather than methadone. U, K: ost3ru                                    | radio (Matrix)<br><table border="1"> <tr><td>1</td><td>1 Strongly disagree</td></tr> <tr><td>2</td><td>2</td></tr> <tr><td>3</td><td>3</td></tr> <tr><td>4</td><td>4</td></tr> <tr><td>5</td><td>5 Strongly agree</td></tr> </table> | 1 | 1 Strongly disagree | 2 | 2          | 3 | 3        | 4 | 4 | 5 | 5 Strongly agree |
| 1                                                                                                      | 1 Strongly disagree                         |                                                                                                                                                                          |                                                                                                                                                                                                                                      |   |                     |   |            |   |          |   |   |   |                  |
| 2                                                                                                      | 2                                           |                                                                                                                                                                          |                                                                                                                                                                                                                                      |   |                     |   |            |   |          |   |   |   |                  |
| 3                                                                                                      | 3                                           |                                                                                                                                                                          |                                                                                                                                                                                                                                      |   |                     |   |            |   |          |   |   |   |                  |
| 4                                                                                                      | 4                                           |                                                                                                                                                                          |                                                                                                                                                                                                                                      |   |                     |   |            |   |          |   |   |   |                  |
| 5                                                                                                      | 5 Strongly agree                            |                                                                                                                                                                          |                                                                                                                                                                                                                                      |   |                     |   |            |   |          |   |   |   |                  |
| 290                                                                                                    | ost4                                        | 4. OST reduces opioid dependent individuals' consumption of illicit opiates. U, K: ost4ru                                                                                | radio (Matrix)<br><table border="1"> <tr><td>1</td><td>1 Strongly disagree</td></tr> <tr><td>2</td><td>2</td></tr> <tr><td>3</td><td>3</td></tr> <tr><td>4</td><td>4</td></tr> <tr><td>5</td><td>5 Strongly agree</td></tr> </table> | 1 | 1 Strongly disagree | 2 | 2          | 3 | 3        | 4 | 4 | 5 | 5 Strongly agree |
| 1                                                                                                      | 1 Strongly disagree                         |                                                                                                                                                                          |                                                                                                                                                                                                                                      |   |                     |   |            |   |          |   |   |   |                  |
| 2                                                                                                      | 2                                           |                                                                                                                                                                          |                                                                                                                                                                                                                                      |   |                     |   |            |   |          |   |   |   |                  |
| 3                                                                                                      | 3                                           |                                                                                                                                                                          |                                                                                                                                                                                                                                      |   |                     |   |            |   |          |   |   |   |                  |
| 4                                                                                                      | 4                                           |                                                                                                                                                                          |                                                                                                                                                                                                                                      |   |                     |   |            |   |          |   |   |   |                  |
| 5                                                                                                      | 5 Strongly agree                            |                                                                                                                                                                          |                                                                                                                                                                                                                                      |   |                     |   |            |   |          |   |   |   |                  |
| 291                                                                                                    | ost5                                        | 5. OST reduces opioid dependent individuals' risk of acquiring or transmitting HIV. U, K: ost5ru                                                                         | radio (Matrix)<br><table border="1"> <tr><td>1</td><td>1 Strongly disagree</td></tr> <tr><td>2</td><td>2</td></tr> <tr><td>3</td><td>3</td></tr> <tr><td>4</td><td>4</td></tr> <tr><td>5</td><td>5 Strongly agree</td></tr> </table> | 1 | 1 Strongly disagree | 2 | 2          | 3 | 3        | 4 | 4 | 5 | 5 Strongly agree |
| 1                                                                                                      | 1 Strongly disagree                         |                                                                                                                                                                          |                                                                                                                                                                                                                                      |   |                     |   |            |   |          |   |   |   |                  |
| 2                                                                                                      | 2                                           |                                                                                                                                                                          |                                                                                                                                                                                                                                      |   |                     |   |            |   |          |   |   |   |                  |
| 3                                                                                                      | 3                                           |                                                                                                                                                                          |                                                                                                                                                                                                                                      |   |                     |   |            |   |          |   |   |   |                  |
| 4                                                                                                      | 4                                           |                                                                                                                                                                          |                                                                                                                                                                                                                                      |   |                     |   |            |   |          |   |   |   |                  |
| 5                                                                                                      | 5 Strongly agree                            |                                                                                                                                                                          |                                                                                                                                                                                                                                      |   |                     |   |            |   |          |   |   |   |                  |
| 292                                                                                                    | ost6                                        | 6. OST improves adherence to HIV medications in HIV-infected opioid dependent individuals. U, K: ost6tru                                                                 | radio (Matrix)<br><table border="1"> <tr><td>1</td><td>1 Strongly disagree</td></tr> <tr><td>2</td><td>2</td></tr> <tr><td>3</td><td>3</td></tr> <tr><td>4</td><td>4</td></tr> <tr><td>5</td><td>5 Strongly agree</td></tr> </table> | 1 | 1 Strongly disagree | 2 | 2          | 3 | 3        | 4 | 4 | 5 | 5 Strongly agree |
| 1                                                                                                      | 1 Strongly disagree                         |                                                                                                                                                                          |                                                                                                                                                                                                                                      |   |                     |   |            |   |          |   |   |   |                  |
| 2                                                                                                      | 2                                           |                                                                                                                                                                          |                                                                                                                                                                                                                                      |   |                     |   |            |   |          |   |   |   |                  |
| 3                                                                                                      | 3                                           |                                                                                                                                                                          |                                                                                                                                                                                                                                      |   |                     |   |            |   |          |   |   |   |                  |
| 4                                                                                                      | 4                                           |                                                                                                                                                                          |                                                                                                                                                                                                                                      |   |                     |   |            |   |          |   |   |   |                  |
| 5                                                                                                      | 5 Strongly agree                            |                                                                                                                                                                          |                                                                                                                                                                                                                                      |   |                     |   |            |   |          |   |   |   |                  |

|     |                                                   |                                                                                               |                                                                                                                                                                                                                                      |   |                     |   |            |   |          |   |   |   |                  |
|-----|---------------------------------------------------|-----------------------------------------------------------------------------------------------|--------------------------------------------------------------------------------------------------------------------------------------------------------------------------------------------------------------------------------------|---|---------------------|---|------------|---|----------|---|---|---|------------------|
| 293 | ost7                                              | 7. OST increases opioid dependent patients' adherence to tuberculosis medication U, K: ost7ru | radio (Matrix)<br><table border="1"> <tr><td>1</td><td>1 Strongly disagree</td></tr> <tr><td>2</td><td>2</td></tr> <tr><td>3</td><td>3</td></tr> <tr><td>4</td><td>4</td></tr> <tr><td>5</td><td>5 Strongly agree</td></tr> </table> | 1 | 1 Strongly disagree | 2 | 2          | 3 | 3        | 4 | 4 | 5 | 5 Strongly agree |
| 1   | 1 Strongly disagree                               |                                                                                               |                                                                                                                                                                                                                                      |   |                     |   |            |   |          |   |   |   |                  |
| 2   | 2                                                 |                                                                                               |                                                                                                                                                                                                                                      |   |                     |   |            |   |          |   |   |   |                  |
| 3   | 3                                                 |                                                                                               |                                                                                                                                                                                                                                      |   |                     |   |            |   |          |   |   |   |                  |
| 4   | 4                                                 |                                                                                               |                                                                                                                                                                                                                                      |   |                     |   |            |   |          |   |   |   |                  |
| 5   | 5 Strongly agree                                  |                                                                                               |                                                                                                                                                                                                                                      |   |                     |   |            |   |          |   |   |   |                  |
| 294 | ost8                                              | 8. OST decreases opioid dependent individuals' risk of dying from overdose. U, K: ost8ru      | radio (Matrix)<br><table border="1"> <tr><td>1</td><td>1 Strongly disagree</td></tr> <tr><td>2</td><td>2</td></tr> <tr><td>3</td><td>3</td></tr> <tr><td>4</td><td>4</td></tr> <tr><td>5</td><td>5 Strongly agree</td></tr> </table> | 1 | 1 Strongly disagree | 2 | 2          | 3 | 3        | 4 | 4 | 5 | 5 Strongly agree |
| 1   | 1 Strongly disagree                               |                                                                                               |                                                                                                                                                                                                                                      |   |                     |   |            |   |          |   |   |   |                  |
| 2   | 2                                                 |                                                                                               |                                                                                                                                                                                                                                      |   |                     |   |            |   |          |   |   |   |                  |
| 3   | 3                                                 |                                                                                               |                                                                                                                                                                                                                                      |   |                     |   |            |   |          |   |   |   |                  |
| 4   | 4                                                 |                                                                                               |                                                                                                                                                                                                                                      |   |                     |   |            |   |          |   |   |   |                  |
| 5   | 5 Strongly agree                                  |                                                                                               |                                                                                                                                                                                                                                      |   |                     |   |            |   |          |   |   |   |                  |
| 295 | ost9                                              | 9. OST reduces an addict's criminal activities. U, K: ost9ru                                  | radio (Matrix)<br><table border="1"> <tr><td>1</td><td>1 Strongly disagree</td></tr> <tr><td>2</td><td>2</td></tr> <tr><td>3</td><td>3</td></tr> <tr><td>4</td><td>4</td></tr> <tr><td>5</td><td>5 Strongly agree</td></tr> </table> | 1 | 1 Strongly disagree | 2 | 2          | 3 | 3        | 4 | 4 | 5 | 5 Strongly agree |
| 1   | 1 Strongly disagree                               |                                                                                               |                                                                                                                                                                                                                                      |   |                     |   |            |   |          |   |   |   |                  |
| 2   | 2                                                 |                                                                                               |                                                                                                                                                                                                                                      |   |                     |   |            |   |          |   |   |   |                  |
| 3   | 3                                                 |                                                                                               |                                                                                                                                                                                                                                      |   |                     |   |            |   |          |   |   |   |                  |
| 4   | 4                                                 |                                                                                               |                                                                                                                                                                                                                                      |   |                     |   |            |   |          |   |   |   |                  |
| 5   | 5 Strongly agree                                  |                                                                                               |                                                                                                                                                                                                                                      |   |                     |   |            |   |          |   |   |   |                  |
| 296 | attitudes_toward_and_knowledge_about_ost_complete | Section Header: <i>Form Status</i><br>Complete?                                               | dropdown<br><table border="1"> <tr><td>0</td><td>Incomplete</td></tr> <tr><td>1</td><td>Unverified</td></tr> <tr><td>2</td><td>Complete</td></tr> </table>                                                                           | 0 | Incomplete          | 1 | Unverified | 2 | Complete |   |   |   |                  |
| 0   | Incomplete                                        |                                                                                               |                                                                                                                                                                                                                                      |   |                     |   |            |   |          |   |   |   |                  |
| 1   | Unverified                                        |                                                                                               |                                                                                                                                                                                                                                      |   |                     |   |            |   |          |   |   |   |                  |
| 2   | Complete                                          |                                                                                               |                                                                                                                                                                                                                                      |   |                     |   |            |   |          |   |   |   |                  |

Instrument: **Perceived Treatment Effectiveness** (perceived\_treatment\_effectiveness)

[^ Collapse](#)

|     |                        |                                                    |                                                                                                                                                                                                                                         |   |                        |   |   |   |   |   |   |   |                  |
|-----|------------------------|----------------------------------------------------|-----------------------------------------------------------------------------------------------------------------------------------------------------------------------------------------------------------------------------------------|---|------------------------|---|---|---|---|---|---|---|------------------|
| 297 | e01                    | 1. Religion U: e01_ru K: e1_ru                     | radio (Matrix)<br><table border="1"> <tr><td>1</td><td>1 not at all effective</td></tr> <tr><td>2</td><td>2</td></tr> <tr><td>3</td><td>3</td></tr> <tr><td>4</td><td>4</td></tr> <tr><td>5</td><td>5 very effective</td></tr> </table> | 1 | 1 not at all effective | 2 | 2 | 3 | 3 | 4 | 4 | 5 | 5 very effective |
| 1   | 1 not at all effective |                                                    |                                                                                                                                                                                                                                         |   |                        |   |   |   |   |   |   |   |                  |
| 2   | 2                      |                                                    |                                                                                                                                                                                                                                         |   |                        |   |   |   |   |   |   |   |                  |
| 3   | 3                      |                                                    |                                                                                                                                                                                                                                         |   |                        |   |   |   |   |   |   |   |                  |
| 4   | 4                      |                                                    |                                                                                                                                                                                                                                         |   |                        |   |   |   |   |   |   |   |                  |
| 5   | 5 very effective       |                                                    |                                                                                                                                                                                                                                         |   |                        |   |   |   |   |   |   |   |                  |
| 298 | e02                    | 2. Incarceration U: e02_ru, K: e2_ru               | radio (Matrix)<br><table border="1"> <tr><td>1</td><td>1 not at all effective</td></tr> <tr><td>2</td><td>2</td></tr> <tr><td>3</td><td>3</td></tr> <tr><td>4</td><td>4</td></tr> <tr><td>5</td><td>5 very effective</td></tr> </table> | 1 | 1 not at all effective | 2 | 2 | 3 | 3 | 4 | 4 | 5 | 5 very effective |
| 1   | 1 not at all effective |                                                    |                                                                                                                                                                                                                                         |   |                        |   |   |   |   |   |   |   |                  |
| 2   | 2                      |                                                    |                                                                                                                                                                                                                                         |   |                        |   |   |   |   |   |   |   |                  |
| 3   | 3                      |                                                    |                                                                                                                                                                                                                                         |   |                        |   |   |   |   |   |   |   |                  |
| 4   | 4                      |                                                    |                                                                                                                                                                                                                                         |   |                        |   |   |   |   |   |   |   |                  |
| 5   | 5 very effective       |                                                    |                                                                                                                                                                                                                                         |   |                        |   |   |   |   |   |   |   |                  |
| 299 | e03                    | 3. Opioid Substitution therapy U: e03_ru, K: e3_ru | radio (Matrix)<br><table border="1"> <tr><td>1</td><td>1 not at all effective</td></tr> <tr><td>2</td><td>2</td></tr> <tr><td>3</td><td>3</td></tr> <tr><td>4</td><td>4</td></tr> <tr><td>5</td><td>5 very effective</td></tr> </table> | 1 | 1 not at all effective | 2 | 2 | 3 | 3 | 4 | 4 | 5 | 5 very effective |
| 1   | 1 not at all effective |                                                    |                                                                                                                                                                                                                                         |   |                        |   |   |   |   |   |   |   |                  |
| 2   | 2                      |                                                    |                                                                                                                                                                                                                                         |   |                        |   |   |   |   |   |   |   |                  |
| 3   | 3                      |                                                    |                                                                                                                                                                                                                                         |   |                        |   |   |   |   |   |   |   |                  |
| 4   | 4                      |                                                    |                                                                                                                                                                                                                                         |   |                        |   |   |   |   |   |   |   |                  |
| 5   | 5 very effective       |                                                    |                                                                                                                                                                                                                                         |   |                        |   |   |   |   |   |   |   |                  |
| 300 | e04                    | 4. Folk medicine U: e04_ru, K: e4_ru               | radio (Matrix)<br><table border="1"> <tr><td>1</td><td>1 not at all effective</td></tr> <tr><td>2</td><td>2</td></tr> <tr><td>3</td><td>3</td></tr> <tr><td>4</td><td>4</td></tr> <tr><td>5</td><td>5 very effective</td></tr> </table> | 1 | 1 not at all effective | 2 | 2 | 3 | 3 | 4 | 4 | 5 | 5 very effective |
| 1   | 1 not at all effective |                                                    |                                                                                                                                                                                                                                         |   |                        |   |   |   |   |   |   |   |                  |
| 2   | 2                      |                                                    |                                                                                                                                                                                                                                         |   |                        |   |   |   |   |   |   |   |                  |
| 3   | 3                      |                                                    |                                                                                                                                                                                                                                         |   |                        |   |   |   |   |   |   |   |                  |
| 4   | 4                      |                                                    |                                                                                                                                                                                                                                         |   |                        |   |   |   |   |   |   |   |                  |
| 5   | 5 very effective       |                                                    |                                                                                                                                                                                                                                         |   |                        |   |   |   |   |   |   |   |                  |

|     |                        |                                         |                                                                                                                                                                                                                                         |   |                        |   |   |   |   |   |   |   |                  |
|-----|------------------------|-----------------------------------------|-----------------------------------------------------------------------------------------------------------------------------------------------------------------------------------------------------------------------------------------|---|------------------------|---|---|---|---|---|---|---|------------------|
| 301 | e05                    | 5. Employment U: e05_ru, K: e5_ru       | radio (Matrix)<br><table border="1"> <tr><td>1</td><td>1 not at all effective</td></tr> <tr><td>2</td><td>2</td></tr> <tr><td>3</td><td>3</td></tr> <tr><td>4</td><td>4</td></tr> <tr><td>5</td><td>5 very effective</td></tr> </table> | 1 | 1 not at all effective | 2 | 2 | 3 | 3 | 4 | 4 | 5 | 5 very effective |
| 1   | 1 not at all effective |                                         |                                                                                                                                                                                                                                         |   |                        |   |   |   |   |   |   |   |                  |
| 2   | 2                      |                                         |                                                                                                                                                                                                                                         |   |                        |   |   |   |   |   |   |   |                  |
| 3   | 3                      |                                         |                                                                                                                                                                                                                                         |   |                        |   |   |   |   |   |   |   |                  |
| 4   | 4                      |                                         |                                                                                                                                                                                                                                         |   |                        |   |   |   |   |   |   |   |                  |
| 5   | 5 very effective       |                                         |                                                                                                                                                                                                                                         |   |                        |   |   |   |   |   |   |   |                  |
| 302 | e06                    | 6. Family support U: e06_ru, , K: e6_ru | radio (Matrix)<br><table border="1"> <tr><td>1</td><td>1 not at all effective</td></tr> <tr><td>2</td><td>2</td></tr> <tr><td>3</td><td>3</td></tr> <tr><td>4</td><td>4</td></tr> <tr><td>5</td><td>5 very effective</td></tr> </table> | 1 | 1 not at all effective | 2 | 2 | 3 | 3 | 4 | 4 | 5 | 5 very effective |
| 1   | 1 not at all effective |                                         |                                                                                                                                                                                                                                         |   |                        |   |   |   |   |   |   |   |                  |
| 2   | 2                      |                                         |                                                                                                                                                                                                                                         |   |                        |   |   |   |   |   |   |   |                  |
| 3   | 3                      |                                         |                                                                                                                                                                                                                                         |   |                        |   |   |   |   |   |   |   |                  |
| 4   | 4                      |                                         |                                                                                                                                                                                                                                         |   |                        |   |   |   |   |   |   |   |                  |
| 5   | 5 very effective       |                                         |                                                                                                                                                                                                                                         |   |                        |   |   |   |   |   |   |   |                  |
| 303 | e07                    | 7. New environment U: e07_ru, K: e7_ru  | radio (Matrix)<br><table border="1"> <tr><td>1</td><td>1 not at all effective</td></tr> <tr><td>2</td><td>2</td></tr> <tr><td>3</td><td>3</td></tr> <tr><td>4</td><td>4</td></tr> <tr><td>5</td><td>5 very effective</td></tr> </table> | 1 | 1 not at all effective | 2 | 2 | 3 | 3 | 4 | 4 | 5 | 5 very effective |
| 1   | 1 not at all effective |                                         |                                                                                                                                                                                                                                         |   |                        |   |   |   |   |   |   |   |                  |
| 2   | 2                      |                                         |                                                                                                                                                                                                                                         |   |                        |   |   |   |   |   |   |   |                  |
| 3   | 3                      |                                         |                                                                                                                                                                                                                                         |   |                        |   |   |   |   |   |   |   |                  |
| 4   | 4                      |                                         |                                                                                                                                                                                                                                         |   |                        |   |   |   |   |   |   |   |                  |
| 5   | 5 very effective       |                                         |                                                                                                                                                                                                                                         |   |                        |   |   |   |   |   |   |   |                  |
| 304 | e08                    | 8. Treatment with medication U: e08_ru  | radio (Matrix)<br><table border="1"> <tr><td>1</td><td>1 not at all effective</td></tr> <tr><td>2</td><td>2</td></tr> <tr><td>3</td><td>3</td></tr> <tr><td>4</td><td>4</td></tr> <tr><td>5</td><td>5 very effective</td></tr> </table> | 1 | 1 not at all effective | 2 | 2 | 3 | 3 | 4 | 4 | 5 | 5 very effective |
| 1   | 1 not at all effective |                                         |                                                                                                                                                                                                                                         |   |                        |   |   |   |   |   |   |   |                  |
| 2   | 2                      |                                         |                                                                                                                                                                                                                                         |   |                        |   |   |   |   |   |   |   |                  |
| 3   | 3                      |                                         |                                                                                                                                                                                                                                         |   |                        |   |   |   |   |   |   |   |                  |
| 4   | 4                      |                                         |                                                                                                                                                                                                                                         |   |                        |   |   |   |   |   |   |   |                  |
| 5   | 5 very effective       |                                         |                                                                                                                                                                                                                                         |   |                        |   |   |   |   |   |   |   |                  |
| 305 | e09                    | 9. Detox U: e09_ru, K: e9_ru            | radio (Matrix)<br><table border="1"> <tr><td>1</td><td>1 not at all effective</td></tr> <tr><td>2</td><td>2</td></tr> <tr><td>3</td><td>3</td></tr> <tr><td>4</td><td>4</td></tr> <tr><td>5</td><td>5 very effective</td></tr> </table> | 1 | 1 not at all effective | 2 | 2 | 3 | 3 | 4 | 4 | 5 | 5 very effective |
| 1   | 1 not at all effective |                                         |                                                                                                                                                                                                                                         |   |                        |   |   |   |   |   |   |   |                  |
| 2   | 2                      |                                         |                                                                                                                                                                                                                                         |   |                        |   |   |   |   |   |   |   |                  |
| 3   | 3                      |                                         |                                                                                                                                                                                                                                         |   |                        |   |   |   |   |   |   |   |                  |
| 4   | 4                      |                                         |                                                                                                                                                                                                                                         |   |                        |   |   |   |   |   |   |   |                  |
| 5   | 5 very effective       |                                         |                                                                                                                                                                                                                                         |   |                        |   |   |   |   |   |   |   |                  |
| 306 | e10                    | 10. Rehabilitation U, K: e10_ru         | radio (Matrix)<br><table border="1"> <tr><td>1</td><td>1 not at all effective</td></tr> <tr><td>2</td><td>2</td></tr> <tr><td>3</td><td>3</td></tr> <tr><td>4</td><td>4</td></tr> <tr><td>5</td><td>5 very effective</td></tr> </table> | 1 | 1 not at all effective | 2 | 2 | 3 | 3 | 4 | 4 | 5 | 5 very effective |
| 1   | 1 not at all effective |                                         |                                                                                                                                                                                                                                         |   |                        |   |   |   |   |   |   |   |                  |
| 2   | 2                      |                                         |                                                                                                                                                                                                                                         |   |                        |   |   |   |   |   |   |   |                  |
| 3   | 3                      |                                         |                                                                                                                                                                                                                                         |   |                        |   |   |   |   |   |   |   |                  |
| 4   | 4                      |                                         |                                                                                                                                                                                                                                         |   |                        |   |   |   |   |   |   |   |                  |
| 5   | 5 very effective       |                                         |                                                                                                                                                                                                                                         |   |                        |   |   |   |   |   |   |   |                  |
| 307 | e11                    | 11. Atlantis U: N/A, , K: e11_ru        | radio (Matrix)<br><table border="1"> <tr><td>1</td><td>1 not at all effective</td></tr> <tr><td>2</td><td>2</td></tr> <tr><td>3</td><td>3</td></tr> <tr><td>4</td><td>4</td></tr> <tr><td>5</td><td>5 very effective</td></tr> </table> | 1 | 1 not at all effective | 2 | 2 | 3 | 3 | 4 | 4 | 5 | 5 very effective |
| 1   | 1 not at all effective |                                         |                                                                                                                                                                                                                                         |   |                        |   |   |   |   |   |   |   |                  |
| 2   | 2                      |                                         |                                                                                                                                                                                                                                         |   |                        |   |   |   |   |   |   |   |                  |
| 3   | 3                      |                                         |                                                                                                                                                                                                                                         |   |                        |   |   |   |   |   |   |   |                  |
| 4   | 4                      |                                         |                                                                                                                                                                                                                                         |   |                        |   |   |   |   |   |   |   |                  |
| 5   | 5 very effective       |                                         |                                                                                                                                                                                                                                         |   |                        |   |   |   |   |   |   |   |                  |
| 308 | e12                    | 12. Clean Zone U: N/A, K: , K: e12_ru   | radio (Matrix)<br><table border="1"> <tr><td>1</td><td>1 not at all effective</td></tr> <tr><td>2</td><td>2</td></tr> <tr><td>3</td><td>3</td></tr> <tr><td>4</td><td>4</td></tr> <tr><td>5</td><td>5 very effective</td></tr> </table> | 1 | 1 not at all effective | 2 | 2 | 3 | 3 | 4 | 4 | 5 | 5 very effective |
| 1   | 1 not at all effective |                                         |                                                                                                                                                                                                                                         |   |                        |   |   |   |   |   |   |   |                  |
| 2   | 2                      |                                         |                                                                                                                                                                                                                                         |   |                        |   |   |   |   |   |   |   |                  |
| 3   | 3                      |                                         |                                                                                                                                                                                                                                         |   |                        |   |   |   |   |   |   |   |                  |
| 4   | 4                      |                                         |                                                                                                                                                                                                                                         |   |                        |   |   |   |   |   |   |   |                  |
| 5   | 5 very effective       |                                         |                                                                                                                                                                                                                                         |   |                        |   |   |   |   |   |   |   |                  |

|                              |                                              |                                                                                                                                                                                                                                                                                                      |                                                                                                                                                                                                                                                                                                                                                                                                                                                                                                                                                                                                                                                                                                                                                                                                                                                                                                                                                                                                                                          |   |                        |                                           |            |        |                               |   |        |                                                  |                  |        |                               |   |        |                                 |   |        |                                   |   |        |                                                    |    |         |                                                |    |         |                                            |    |         |                                                                        |    |         |                                                    |
|------------------------------|----------------------------------------------|------------------------------------------------------------------------------------------------------------------------------------------------------------------------------------------------------------------------------------------------------------------------------------------------------|------------------------------------------------------------------------------------------------------------------------------------------------------------------------------------------------------------------------------------------------------------------------------------------------------------------------------------------------------------------------------------------------------------------------------------------------------------------------------------------------------------------------------------------------------------------------------------------------------------------------------------------------------------------------------------------------------------------------------------------------------------------------------------------------------------------------------------------------------------------------------------------------------------------------------------------------------------------------------------------------------------------------------------------|---|------------------------|-------------------------------------------|------------|--------|-------------------------------|---|--------|--------------------------------------------------|------------------|--------|-------------------------------|---|--------|---------------------------------|---|--------|-----------------------------------|---|--------|----------------------------------------------------|----|---------|------------------------------------------------|----|---------|--------------------------------------------|----|---------|------------------------------------------------------------------------|----|---------|----------------------------------------------------|
| 309                          | e13                                          | 13. Other(specify below) U, K: e13_ru                                                                                                                                                                                                                                                                | radio (Matrix)<br><table border="1"> <tr><td>1</td><td>1 not at all effective</td></tr> <tr><td>2</td><td>2</td></tr> <tr><td>3</td><td>3</td></tr> <tr><td>4</td><td>4</td></tr> <tr><td>5</td><td>5 very effective</td></tr> </table>                                                                                                                                                                                                                                                                                                                                                                                                                                                                                                                                                                                                                                                                                                                                                                                                  | 1 | 1 not at all effective | 2                                         | 2          | 3      | 3                             | 4 | 4      | 5                                                | 5 very effective |        |                               |   |        |                                 |   |        |                                   |   |        |                                                    |    |         |                                                |    |         |                                            |    |         |                                                                        |    |         |                                                    |
| 1                            | 1 not at all effective                       |                                                                                                                                                                                                                                                                                                      |                                                                                                                                                                                                                                                                                                                                                                                                                                                                                                                                                                                                                                                                                                                                                                                                                                                                                                                                                                                                                                          |   |                        |                                           |            |        |                               |   |        |                                                  |                  |        |                               |   |        |                                 |   |        |                                   |   |        |                                                    |    |         |                                                |    |         |                                            |    |         |                                                                        |    |         |                                                    |
| 2                            | 2                                            |                                                                                                                                                                                                                                                                                                      |                                                                                                                                                                                                                                                                                                                                                                                                                                                                                                                                                                                                                                                                                                                                                                                                                                                                                                                                                                                                                                          |   |                        |                                           |            |        |                               |   |        |                                                  |                  |        |                               |   |        |                                 |   |        |                                   |   |        |                                                    |    |         |                                                |    |         |                                            |    |         |                                                                        |    |         |                                                    |
| 3                            | 3                                            |                                                                                                                                                                                                                                                                                                      |                                                                                                                                                                                                                                                                                                                                                                                                                                                                                                                                                                                                                                                                                                                                                                                                                                                                                                                                                                                                                                          |   |                        |                                           |            |        |                               |   |        |                                                  |                  |        |                               |   |        |                                 |   |        |                                   |   |        |                                                    |    |         |                                                |    |         |                                            |    |         |                                                                        |    |         |                                                    |
| 4                            | 4                                            |                                                                                                                                                                                                                                                                                                      |                                                                                                                                                                                                                                                                                                                                                                                                                                                                                                                                                                                                                                                                                                                                                                                                                                                                                                                                                                                                                                          |   |                        |                                           |            |        |                               |   |        |                                                  |                  |        |                               |   |        |                                 |   |        |                                   |   |        |                                                    |    |         |                                                |    |         |                                            |    |         |                                                                        |    |         |                                                    |
| 5                            | 5 very effective                             |                                                                                                                                                                                                                                                                                                      |                                                                                                                                                                                                                                                                                                                                                                                                                                                                                                                                                                                                                                                                                                                                                                                                                                                                                                                                                                                                                                          |   |                        |                                           |            |        |                               |   |        |                                                  |                  |        |                               |   |        |                                 |   |        |                                   |   |        |                                                    |    |         |                                                |    |         |                                            |    |         |                                                                        |    |         |                                                    |
| 310                          | e13oth                                       | Specify Other U, K: , K: e13othru                                                                                                                                                                                                                                                                    | text                                                                                                                                                                                                                                                                                                                                                                                                                                                                                                                                                                                                                                                                                                                                                                                                                                                                                                                                                                                                                                     |   |                        |                                           |            |        |                               |   |        |                                                  |                  |        |                               |   |        |                                 |   |        |                                   |   |        |                                                    |    |         |                                                |    |         |                                            |    |         |                                                                        |    |         |                                                    |
| 311                          | perceived_treatment_effectiveness_complete   | Section Header: <i>Form Status</i><br>Complete?                                                                                                                                                                                                                                                      | dropdown<br><table border="1"> <tr><td>0</td><td>Incomplete</td></tr> <tr><td>1</td><td>Unverified</td></tr> <tr><td>2</td><td>Complete</td></tr> </table>                                                                                                                                                                                                                                                                                                                                                                                                                                                                                                                                                                                                                                                                                                                                                                                                                                                                               | 0 | Incomplete             | 1                                         | Unverified | 2      | Complete                      |   |        |                                                  |                  |        |                               |   |        |                                 |   |        |                                   |   |        |                                                    |    |         |                                                |    |         |                                            |    |         |                                                                        |    |         |                                                    |
| 0                            | Incomplete                                   |                                                                                                                                                                                                                                                                                                      |                                                                                                                                                                                                                                                                                                                                                                                                                                                                                                                                                                                                                                                                                                                                                                                                                                                                                                                                                                                                                                          |   |                        |                                           |            |        |                               |   |        |                                                  |                  |        |                               |   |        |                                 |   |        |                                   |   |        |                                                    |    |         |                                                |    |         |                                            |    |         |                                                                        |    |         |                                                    |
| 1                            | Unverified                                   |                                                                                                                                                                                                                                                                                                      |                                                                                                                                                                                                                                                                                                                                                                                                                                                                                                                                                                                                                                                                                                                                                                                                                                                                                                                                                                                                                                          |   |                        |                                           |            |        |                               |   |        |                                                  |                  |        |                               |   |        |                                 |   |        |                                   |   |        |                                                    |    |         |                                                |    |         |                                            |    |         |                                                                        |    |         |                                                    |
| 2                            | Complete                                     |                                                                                                                                                                                                                                                                                                      |                                                                                                                                                                                                                                                                                                                                                                                                                                                                                                                                                                                                                                                                                                                                                                                                                                                                                                                                                                                                                                          |   |                        |                                           |            |        |                               |   |        |                                                  |                  |        |                               |   |        |                                 |   |        |                                   |   |        |                                                    |    |         |                                                |    |         |                                            |    |         |                                                                        |    |         |                                                    |
| Instrument: <b>Ost</b> (ost) |                                              |                                                                                                                                                                                                                                                                                                      | <a href="#">^ Collapse</a>                                                                                                                                                                                                                                                                                                                                                                                                                                                                                                                                                                                                                                                                                                                                                                                                                                                                                                                                                                                                               |   |                        |                                           |            |        |                               |   |        |                                                  |                  |        |                               |   |        |                                 |   |        |                                   |   |        |                                                    |    |         |                                                |    |         |                                            |    |         |                                                                        |    |         |                                                    |
| 312                          | ost_label                                    | Section Header: <i>OST:Entry Attempts</i><br>The next series of questions are going to ask you about your interest and experience with OST (methadone/ Buprenorphine treatment). By OST program, I mean receiving methadone/ Buprenorphine in a medical facility on a regular basis and taking it or | descriptive                                                                                                                                                                                                                                                                                                                                                                                                                                                                                                                                                                                                                                                                                                                                                                                                                                                                                                                                                                                                                              |   |                        |                                           |            |        |                               |   |        |                                                  |                  |        |                               |   |        |                                 |   |        |                                   |   |        |                                                    |    |         |                                                |    |         |                                            |    |         |                                                                        |    |         |                                                    |
| 313                          | ma1                                          | 1. Have you ever tried to enter the OST program? U, K:ma1ru                                                                                                                                                                                                                                          | yesno<br><table border="1"> <tr><td>1</td><td>Yes</td></tr> <tr><td>0</td><td>No</td></tr> </table>                                                                                                                                                                                                                                                                                                                                                                                                                                                                                                                                                                                                                                                                                                                                                                                                                                                                                                                                      | 1 | Yes                    | 0                                         | No         |        |                               |   |        |                                                  |                  |        |                               |   |        |                                 |   |        |                                   |   |        |                                                    |    |         |                                                |    |         |                                            |    |         |                                                                        |    |         |                                                    |
| 1                            | Yes                                          |                                                                                                                                                                                                                                                                                                      |                                                                                                                                                                                                                                                                                                                                                                                                                                                                                                                                                                                                                                                                                                                                                                                                                                                                                                                                                                                                                                          |   |                        |                                           |            |        |                               |   |        |                                                  |                  |        |                               |   |        |                                 |   |        |                                   |   |        |                                                    |    |         |                                                |    |         |                                            |    |         |                                                                        |    |         |                                                    |
| 0                            | No                                           |                                                                                                                                                                                                                                                                                                      |                                                                                                                                                                                                                                                                                                                                                                                                                                                                                                                                                                                                                                                                                                                                                                                                                                                                                                                                                                                                                                          |   |                        |                                           |            |        |                               |   |        |                                                  |                  |        |                               |   |        |                                 |   |        |                                   |   |        |                                                    |    |         |                                                |    |         |                                            |    |         |                                                                        |    |         |                                                    |
| 314                          | ma3                                          | How many attempts have you made at entering an OST program?                                                                                                                                                                                                                                          | text                                                                                                                                                                                                                                                                                                                                                                                                                                                                                                                                                                                                                                                                                                                                                                                                                                                                                                                                                                                                                                     |   |                        |                                           |            |        |                               |   |        |                                                  |                  |        |                               |   |        |                                 |   |        |                                   |   |        |                                                    |    |         |                                                |    |         |                                            |    |         |                                                                        |    |         |                                                    |
| 315                          | ma4<br>Show the field ONLY if: [ma1] = '1'   | 4. In what month was your last attempt? U, K:ma4ru                                                                                                                                                                                                                                                   | text (number, Min: 1, Max: 12)                                                                                                                                                                                                                                                                                                                                                                                                                                                                                                                                                                                                                                                                                                                                                                                                                                                                                                                                                                                                           |   |                        |                                           |            |        |                               |   |        |                                                  |                  |        |                               |   |        |                                 |   |        |                                   |   |        |                                                    |    |         |                                                |    |         |                                            |    |         |                                                                        |    |         |                                                    |
| 316                          | ma4yr<br>Show the field ONLY if: [ma1] = '1' | 4. In what year was your last attempt? U, K:ma4yr_ru                                                                                                                                                                                                                                                 | text (number, Min: 1970, Max: 2018)                                                                                                                                                                                                                                                                                                                                                                                                                                                                                                                                                                                                                                                                                                                                                                                                                                                                                                                                                                                                      |   |                        |                                           |            |        |                               |   |        |                                                  |                  |        |                               |   |        |                                 |   |        |                                   |   |        |                                                    |    |         |                                                |    |         |                                            |    |         |                                                                        |    |         |                                                    |
| 317                          | ma5<br>Show the field ONLY if: [ma1] = '1'   | 5. If you have not entered the program during the most recent attempt, what were the MAIN reasons for not entering the program during your most recent attempt? (check 3) U, K:ma5ru                                                                                                                 | checkbox<br><table border="1"> <tr><td>1</td><td>ma5__1</td><td>Does not apply (have entered the program)</td></tr> <tr><td>4</td><td>ma5__4</td><td>Didn't want to get registered</td></tr> <tr><td>5</td><td>ma5__5</td><td>I did not like the rules of being on the program</td></tr> <tr><td>6</td><td>ma5__6</td><td>The hours were not convenient</td></tr> <tr><td>7</td><td>ma5__7</td><td>The location was not convenient</td></tr> <tr><td>8</td><td>ma5__8</td><td>I was treated poorly by the staff</td></tr> <tr><td>9</td><td>ma5__9</td><td>I was told I was not eligible to enter the program</td></tr> <tr><td>10</td><td>ma5__10</td><td>My family did not want me to enter the program</td></tr> <tr><td>11</td><td>ma5__11</td><td>There was no availability for registration</td></tr> <tr><td>12</td><td>ma5__12</td><td>don't want to be blamed for cooperation with administration (Kyr Only)</td></tr> <tr><td>13</td><td>ma5__13</td><td>Don't want to lose my status among peers(kyr Only)</td></tr> </table> | 1 | ma5__1                 | Does not apply (have entered the program) | 4          | ma5__4 | Didn't want to get registered | 5 | ma5__5 | I did not like the rules of being on the program | 6                | ma5__6 | The hours were not convenient | 7 | ma5__7 | The location was not convenient | 8 | ma5__8 | I was treated poorly by the staff | 9 | ma5__9 | I was told I was not eligible to enter the program | 10 | ma5__10 | My family did not want me to enter the program | 11 | ma5__11 | There was no availability for registration | 12 | ma5__12 | don't want to be blamed for cooperation with administration (Kyr Only) | 13 | ma5__13 | Don't want to lose my status among peers(kyr Only) |
| 1                            | ma5__1                                       | Does not apply (have entered the program)                                                                                                                                                                                                                                                            |                                                                                                                                                                                                                                                                                                                                                                                                                                                                                                                                                                                                                                                                                                                                                                                                                                                                                                                                                                                                                                          |   |                        |                                           |            |        |                               |   |        |                                                  |                  |        |                               |   |        |                                 |   |        |                                   |   |        |                                                    |    |         |                                                |    |         |                                            |    |         |                                                                        |    |         |                                                    |
| 4                            | ma5__4                                       | Didn't want to get registered                                                                                                                                                                                                                                                                        |                                                                                                                                                                                                                                                                                                                                                                                                                                                                                                                                                                                                                                                                                                                                                                                                                                                                                                                                                                                                                                          |   |                        |                                           |            |        |                               |   |        |                                                  |                  |        |                               |   |        |                                 |   |        |                                   |   |        |                                                    |    |         |                                                |    |         |                                            |    |         |                                                                        |    |         |                                                    |
| 5                            | ma5__5                                       | I did not like the rules of being on the program                                                                                                                                                                                                                                                     |                                                                                                                                                                                                                                                                                                                                                                                                                                                                                                                                                                                                                                                                                                                                                                                                                                                                                                                                                                                                                                          |   |                        |                                           |            |        |                               |   |        |                                                  |                  |        |                               |   |        |                                 |   |        |                                   |   |        |                                                    |    |         |                                                |    |         |                                            |    |         |                                                                        |    |         |                                                    |
| 6                            | ma5__6                                       | The hours were not convenient                                                                                                                                                                                                                                                                        |                                                                                                                                                                                                                                                                                                                                                                                                                                                                                                                                                                                                                                                                                                                                                                                                                                                                                                                                                                                                                                          |   |                        |                                           |            |        |                               |   |        |                                                  |                  |        |                               |   |        |                                 |   |        |                                   |   |        |                                                    |    |         |                                                |    |         |                                            |    |         |                                                                        |    |         |                                                    |
| 7                            | ma5__7                                       | The location was not convenient                                                                                                                                                                                                                                                                      |                                                                                                                                                                                                                                                                                                                                                                                                                                                                                                                                                                                                                                                                                                                                                                                                                                                                                                                                                                                                                                          |   |                        |                                           |            |        |                               |   |        |                                                  |                  |        |                               |   |        |                                 |   |        |                                   |   |        |                                                    |    |         |                                                |    |         |                                            |    |         |                                                                        |    |         |                                                    |
| 8                            | ma5__8                                       | I was treated poorly by the staff                                                                                                                                                                                                                                                                    |                                                                                                                                                                                                                                                                                                                                                                                                                                                                                                                                                                                                                                                                                                                                                                                                                                                                                                                                                                                                                                          |   |                        |                                           |            |        |                               |   |        |                                                  |                  |        |                               |   |        |                                 |   |        |                                   |   |        |                                                    |    |         |                                                |    |         |                                            |    |         |                                                                        |    |         |                                                    |
| 9                            | ma5__9                                       | I was told I was not eligible to enter the program                                                                                                                                                                                                                                                   |                                                                                                                                                                                                                                                                                                                                                                                                                                                                                                                                                                                                                                                                                                                                                                                                                                                                                                                                                                                                                                          |   |                        |                                           |            |        |                               |   |        |                                                  |                  |        |                               |   |        |                                 |   |        |                                   |   |        |                                                    |    |         |                                                |    |         |                                            |    |         |                                                                        |    |         |                                                    |
| 10                           | ma5__10                                      | My family did not want me to enter the program                                                                                                                                                                                                                                                       |                                                                                                                                                                                                                                                                                                                                                                                                                                                                                                                                                                                                                                                                                                                                                                                                                                                                                                                                                                                                                                          |   |                        |                                           |            |        |                               |   |        |                                                  |                  |        |                               |   |        |                                 |   |        |                                   |   |        |                                                    |    |         |                                                |    |         |                                            |    |         |                                                                        |    |         |                                                    |
| 11                           | ma5__11                                      | There was no availability for registration                                                                                                                                                                                                                                                           |                                                                                                                                                                                                                                                                                                                                                                                                                                                                                                                                                                                                                                                                                                                                                                                                                                                                                                                                                                                                                                          |   |                        |                                           |            |        |                               |   |        |                                                  |                  |        |                               |   |        |                                 |   |        |                                   |   |        |                                                    |    |         |                                                |    |         |                                            |    |         |                                                                        |    |         |                                                    |
| 12                           | ma5__12                                      | don't want to be blamed for cooperation with administration (Kyr Only)                                                                                                                                                                                                                               |                                                                                                                                                                                                                                                                                                                                                                                                                                                                                                                                                                                                                                                                                                                                                                                                                                                                                                                                                                                                                                          |   |                        |                                           |            |        |                               |   |        |                                                  |                  |        |                               |   |        |                                 |   |        |                                   |   |        |                                                    |    |         |                                                |    |         |                                            |    |         |                                                                        |    |         |                                                    |
| 13                           | ma5__13                                      | Don't want to lose my status among peers(kyr Only)                                                                                                                                                                                                                                                   |                                                                                                                                                                                                                                                                                                                                                                                                                                                                                                                                                                                                                                                                                                                                                                                                                                                                                                                                                                                                                                          |   |                        |                                           |            |        |                               |   |        |                                                  |                  |        |                               |   |        |                                 |   |        |                                   |   |        |                                                    |    |         |                                                |    |         |                                            |    |         |                                                                        |    |         |                                                    |
| 318                          | ma6<br>Show the field ONLY if: [ma1] = '1'   | 6. How many times overall did you officially enter onto OST substitution program? U:ma6ru<br><i>times</i>                                                                                                                                                                                            | text (number, Min: 0, Max: 10)                                                                                                                                                                                                                                                                                                                                                                                                                                                                                                                                                                                                                                                                                                                                                                                                                                                                                                                                                                                                           |   |                        |                                           |            |        |                               |   |        |                                                  |                  |        |                               |   |        |                                 |   |        |                                   |   |        |                                                    |    |         |                                                |    |         |                                            |    |         |                                                                        |    |         |                                                    |



|     |                                                          |                                                                                                                                                                                                                                                                                                                                                                                                                                                                                 |                                                                                                                                                                                                                                                                                                                                                                                                                                                                                                                                                                                                                                                                                                                                                                                                                                                                                                                                                                                                                                                                                                                                                                                                                                                                                                                                                                                                                              |   |                          |                        |    |          |                                                                  |   |          |                                   |   |          |                                                    |   |          |                                                |   |          |                                  |   |          |                                           |                     |          |                                                         |   |          |                                                               |    |           |                                        |    |           |                                          |    |           |                                        |    |           |                                                             |    |           |                                          |
|-----|----------------------------------------------------------|---------------------------------------------------------------------------------------------------------------------------------------------------------------------------------------------------------------------------------------------------------------------------------------------------------------------------------------------------------------------------------------------------------------------------------------------------------------------------------|------------------------------------------------------------------------------------------------------------------------------------------------------------------------------------------------------------------------------------------------------------------------------------------------------------------------------------------------------------------------------------------------------------------------------------------------------------------------------------------------------------------------------------------------------------------------------------------------------------------------------------------------------------------------------------------------------------------------------------------------------------------------------------------------------------------------------------------------------------------------------------------------------------------------------------------------------------------------------------------------------------------------------------------------------------------------------------------------------------------------------------------------------------------------------------------------------------------------------------------------------------------------------------------------------------------------------------------------------------------------------------------------------------------------------|---|--------------------------|------------------------|----|----------|------------------------------------------------------------------|---|----------|-----------------------------------|---|----------|----------------------------------------------------|---|----------|------------------------------------------------|---|----------|----------------------------------|---|----------|-------------------------------------------|---------------------|----------|---------------------------------------------------------|---|----------|---------------------------------------------------------------|----|-----------|----------------------------------------|----|-----------|------------------------------------------|----|-----------|----------------------------------------|----|-----------|-------------------------------------------------------------|----|-----------|------------------------------------------|
| 319 | <p>ma1a</p> <p>Show the field ONLY if: [ma1] = '0'</p>   | <p>Section Header: <i>OST: Attitudes(Never OST)</i></p> <p>1a. You said you have never been in a OST program, are you interested in getting OST? U, K:ma1aru. CHANGE NO from 2 to 0</p>                                                                                                                                                                                                                                                                                         | <p>radio</p> <table border="1"> <tr> <td>1</td> <td>Yes</td> </tr> <tr> <td>0</td> <td>No</td> </tr> </table>                                                                                                                                                                                                                                                                                                                                                                                                                                                                                                                                                                                                                                                                                                                                                                                                                                                                                                                                                                                                                                                                                                                                                                                                                                                                                                                | 1 | Yes                      | 0                      | No |          |                                                                  |   |          |                                   |   |          |                                                    |   |          |                                                |   |          |                                  |   |          |                                           |                     |          |                                                         |   |          |                                                               |    |           |                                        |    |           |                                          |    |           |                                        |    |           |                                                             |    |           |                                          |
| 1   | Yes                                                      |                                                                                                                                                                                                                                                                                                                                                                                                                                                                                 |                                                                                                                                                                                                                                                                                                                                                                                                                                                                                                                                                                                                                                                                                                                                                                                                                                                                                                                                                                                                                                                                                                                                                                                                                                                                                                                                                                                                                              |   |                          |                        |    |          |                                                                  |   |          |                                   |   |          |                                                    |   |          |                                                |   |          |                                  |   |          |                                           |                     |          |                                                         |   |          |                                                               |    |           |                                        |    |           |                                          |    |           |                                        |    |           |                                                             |    |           |                                          |
| 0   | No                                                       |                                                                                                                                                                                                                                                                                                                                                                                                                                                                                 |                                                                                                                                                                                                                                                                                                                                                                                                                                                                                                                                                                                                                                                                                                                                                                                                                                                                                                                                                                                                                                                                                                                                                                                                                                                                                                                                                                                                                              |   |                          |                        |    |          |                                                                  |   |          |                                   |   |          |                                                    |   |          |                                                |   |          |                                  |   |          |                                           |                     |          |                                                         |   |          |                                                               |    |           |                                        |    |           |                                          |    |           |                                        |    |           |                                                             |    |           |                                          |
| 320 | <p>ma1a1</p> <p>Show the field ONLY if: [ma1a] = '0'</p> | <p>We would like to know why you are NOT interested in getting methadone treatment. Please, read the different statements and indicate if any of these statements describe a reason why you do not want to start treatment. You may have more than one reason. U, K:ma1a1ru</p>                                                                                                                                                                                                 | <p>checkbox</p> <table border="1"> <tr> <td>1</td> <td>ma1a1__1</td> <td>Didn't know it existed</td> </tr> <tr> <td>2</td> <td>ma1a1__2</td> <td>I do not like the rules of being on the program (hours/location)</td> </tr> <tr> <td>3</td> <td>ma1a1__3</td> <td>I was treated poorly by the staff</td> </tr> <tr> <td>4</td> <td>ma1a1__4</td> <td>I was told I was not eligible to enter the program</td> </tr> <tr> <td>5</td> <td>ma1a1__5</td> <td>Didn't want to get registered (medical record)</td> </tr> <tr> <td>6</td> <td>ma1a1__6</td> <td>Methadone will destroy my health</td> </tr> <tr> <td>7</td> <td>ma1a1__7</td> <td>I will have to take Methadone all my life</td> </tr> <tr> <td>8</td> <td>ma1a1__8</td> <td>My family and friends have a negative feeling about OST</td> </tr> <tr> <td>9</td> <td>ma1a1__9</td> <td>My friends had bad experience of OST (their health got worse)</td> </tr> <tr> <td>10</td> <td>ma1a1__10</td> <td>Methadone is free and thus bad quality</td> </tr> <tr> <td>11</td> <td>ma1a1__11</td> <td>I don't want my friends know I am in OST</td> </tr> <tr> <td>12</td> <td>ma1a1__12</td> <td>I think Methadone is just another drug</td> </tr> <tr> <td>15</td> <td>ma1a1__15</td> <td>Don't want to be blamed for cooperation with administration</td> </tr> <tr> <td>16</td> <td>ma1a1__16</td> <td>Don't want to lose my status among peers</td> </tr> </table> | 1 | ma1a1__1                 | Didn't know it existed | 2  | ma1a1__2 | I do not like the rules of being on the program (hours/location) | 3 | ma1a1__3 | I was treated poorly by the staff | 4 | ma1a1__4 | I was told I was not eligible to enter the program | 5 | ma1a1__5 | Didn't want to get registered (medical record) | 6 | ma1a1__6 | Methadone will destroy my health | 7 | ma1a1__7 | I will have to take Methadone all my life | 8                   | ma1a1__8 | My family and friends have a negative feeling about OST | 9 | ma1a1__9 | My friends had bad experience of OST (their health got worse) | 10 | ma1a1__10 | Methadone is free and thus bad quality | 11 | ma1a1__11 | I don't want my friends know I am in OST | 12 | ma1a1__12 | I think Methadone is just another drug | 15 | ma1a1__15 | Don't want to be blamed for cooperation with administration | 16 | ma1a1__16 | Don't want to lose my status among peers |
| 1   | ma1a1__1                                                 | Didn't know it existed                                                                                                                                                                                                                                                                                                                                                                                                                                                          |                                                                                                                                                                                                                                                                                                                                                                                                                                                                                                                                                                                                                                                                                                                                                                                                                                                                                                                                                                                                                                                                                                                                                                                                                                                                                                                                                                                                                              |   |                          |                        |    |          |                                                                  |   |          |                                   |   |          |                                                    |   |          |                                                |   |          |                                  |   |          |                                           |                     |          |                                                         |   |          |                                                               |    |           |                                        |    |           |                                          |    |           |                                        |    |           |                                                             |    |           |                                          |
| 2   | ma1a1__2                                                 | I do not like the rules of being on the program (hours/location)                                                                                                                                                                                                                                                                                                                                                                                                                |                                                                                                                                                                                                                                                                                                                                                                                                                                                                                                                                                                                                                                                                                                                                                                                                                                                                                                                                                                                                                                                                                                                                                                                                                                                                                                                                                                                                                              |   |                          |                        |    |          |                                                                  |   |          |                                   |   |          |                                                    |   |          |                                                |   |          |                                  |   |          |                                           |                     |          |                                                         |   |          |                                                               |    |           |                                        |    |           |                                          |    |           |                                        |    |           |                                                             |    |           |                                          |
| 3   | ma1a1__3                                                 | I was treated poorly by the staff                                                                                                                                                                                                                                                                                                                                                                                                                                               |                                                                                                                                                                                                                                                                                                                                                                                                                                                                                                                                                                                                                                                                                                                                                                                                                                                                                                                                                                                                                                                                                                                                                                                                                                                                                                                                                                                                                              |   |                          |                        |    |          |                                                                  |   |          |                                   |   |          |                                                    |   |          |                                                |   |          |                                  |   |          |                                           |                     |          |                                                         |   |          |                                                               |    |           |                                        |    |           |                                          |    |           |                                        |    |           |                                                             |    |           |                                          |
| 4   | ma1a1__4                                                 | I was told I was not eligible to enter the program                                                                                                                                                                                                                                                                                                                                                                                                                              |                                                                                                                                                                                                                                                                                                                                                                                                                                                                                                                                                                                                                                                                                                                                                                                                                                                                                                                                                                                                                                                                                                                                                                                                                                                                                                                                                                                                                              |   |                          |                        |    |          |                                                                  |   |          |                                   |   |          |                                                    |   |          |                                                |   |          |                                  |   |          |                                           |                     |          |                                                         |   |          |                                                               |    |           |                                        |    |           |                                          |    |           |                                        |    |           |                                                             |    |           |                                          |
| 5   | ma1a1__5                                                 | Didn't want to get registered (medical record)                                                                                                                                                                                                                                                                                                                                                                                                                                  |                                                                                                                                                                                                                                                                                                                                                                                                                                                                                                                                                                                                                                                                                                                                                                                                                                                                                                                                                                                                                                                                                                                                                                                                                                                                                                                                                                                                                              |   |                          |                        |    |          |                                                                  |   |          |                                   |   |          |                                                    |   |          |                                                |   |          |                                  |   |          |                                           |                     |          |                                                         |   |          |                                                               |    |           |                                        |    |           |                                          |    |           |                                        |    |           |                                                             |    |           |                                          |
| 6   | ma1a1__6                                                 | Methadone will destroy my health                                                                                                                                                                                                                                                                                                                                                                                                                                                |                                                                                                                                                                                                                                                                                                                                                                                                                                                                                                                                                                                                                                                                                                                                                                                                                                                                                                                                                                                                                                                                                                                                                                                                                                                                                                                                                                                                                              |   |                          |                        |    |          |                                                                  |   |          |                                   |   |          |                                                    |   |          |                                                |   |          |                                  |   |          |                                           |                     |          |                                                         |   |          |                                                               |    |           |                                        |    |           |                                          |    |           |                                        |    |           |                                                             |    |           |                                          |
| 7   | ma1a1__7                                                 | I will have to take Methadone all my life                                                                                                                                                                                                                                                                                                                                                                                                                                       |                                                                                                                                                                                                                                                                                                                                                                                                                                                                                                                                                                                                                                                                                                                                                                                                                                                                                                                                                                                                                                                                                                                                                                                                                                                                                                                                                                                                                              |   |                          |                        |    |          |                                                                  |   |          |                                   |   |          |                                                    |   |          |                                                |   |          |                                  |   |          |                                           |                     |          |                                                         |   |          |                                                               |    |           |                                        |    |           |                                          |    |           |                                        |    |           |                                                             |    |           |                                          |
| 8   | ma1a1__8                                                 | My family and friends have a negative feeling about OST                                                                                                                                                                                                                                                                                                                                                                                                                         |                                                                                                                                                                                                                                                                                                                                                                                                                                                                                                                                                                                                                                                                                                                                                                                                                                                                                                                                                                                                                                                                                                                                                                                                                                                                                                                                                                                                                              |   |                          |                        |    |          |                                                                  |   |          |                                   |   |          |                                                    |   |          |                                                |   |          |                                  |   |          |                                           |                     |          |                                                         |   |          |                                                               |    |           |                                        |    |           |                                          |    |           |                                        |    |           |                                                             |    |           |                                          |
| 9   | ma1a1__9                                                 | My friends had bad experience of OST (their health got worse)                                                                                                                                                                                                                                                                                                                                                                                                                   |                                                                                                                                                                                                                                                                                                                                                                                                                                                                                                                                                                                                                                                                                                                                                                                                                                                                                                                                                                                                                                                                                                                                                                                                                                                                                                                                                                                                                              |   |                          |                        |    |          |                                                                  |   |          |                                   |   |          |                                                    |   |          |                                                |   |          |                                  |   |          |                                           |                     |          |                                                         |   |          |                                                               |    |           |                                        |    |           |                                          |    |           |                                        |    |           |                                                             |    |           |                                          |
| 10  | ma1a1__10                                                | Methadone is free and thus bad quality                                                                                                                                                                                                                                                                                                                                                                                                                                          |                                                                                                                                                                                                                                                                                                                                                                                                                                                                                                                                                                                                                                                                                                                                                                                                                                                                                                                                                                                                                                                                                                                                                                                                                                                                                                                                                                                                                              |   |                          |                        |    |          |                                                                  |   |          |                                   |   |          |                                                    |   |          |                                                |   |          |                                  |   |          |                                           |                     |          |                                                         |   |          |                                                               |    |           |                                        |    |           |                                          |    |           |                                        |    |           |                                                             |    |           |                                          |
| 11  | ma1a1__11                                                | I don't want my friends know I am in OST                                                                                                                                                                                                                                                                                                                                                                                                                                        |                                                                                                                                                                                                                                                                                                                                                                                                                                                                                                                                                                                                                                                                                                                                                                                                                                                                                                                                                                                                                                                                                                                                                                                                                                                                                                                                                                                                                              |   |                          |                        |    |          |                                                                  |   |          |                                   |   |          |                                                    |   |          |                                                |   |          |                                  |   |          |                                           |                     |          |                                                         |   |          |                                                               |    |           |                                        |    |           |                                          |    |           |                                        |    |           |                                                             |    |           |                                          |
| 12  | ma1a1__12                                                | I think Methadone is just another drug                                                                                                                                                                                                                                                                                                                                                                                                                                          |                                                                                                                                                                                                                                                                                                                                                                                                                                                                                                                                                                                                                                                                                                                                                                                                                                                                                                                                                                                                                                                                                                                                                                                                                                                                                                                                                                                                                              |   |                          |                        |    |          |                                                                  |   |          |                                   |   |          |                                                    |   |          |                                                |   |          |                                  |   |          |                                           |                     |          |                                                         |   |          |                                                               |    |           |                                        |    |           |                                          |    |           |                                        |    |           |                                                             |    |           |                                          |
| 15  | ma1a1__15                                                | Don't want to be blamed for cooperation with administration                                                                                                                                                                                                                                                                                                                                                                                                                     |                                                                                                                                                                                                                                                                                                                                                                                                                                                                                                                                                                                                                                                                                                                                                                                                                                                                                                                                                                                                                                                                                                                                                                                                                                                                                                                                                                                                                              |   |                          |                        |    |          |                                                                  |   |          |                                   |   |          |                                                    |   |          |                                                |   |          |                                  |   |          |                                           |                     |          |                                                         |   |          |                                                               |    |           |                                        |    |           |                                          |    |           |                                        |    |           |                                                             |    |           |                                          |
| 16  | ma1a1__16                                                | Don't want to lose my status among peers                                                                                                                                                                                                                                                                                                                                                                                                                                        |                                                                                                                                                                                                                                                                                                                                                                                                                                                                                                                                                                                                                                                                                                                                                                                                                                                                                                                                                                                                                                                                                                                                                                                                                                                                                                                                                                                                                              |   |                          |                        |    |          |                                                                  |   |          |                                   |   |          |                                                    |   |          |                                                |   |          |                                  |   |          |                                           |                     |          |                                                         |   |          |                                                               |    |           |                                        |    |           |                                          |    |           |                                        |    |           |                                                             |    |           |                                          |
| 321 | <p>ma1b</p> <p>Show the field ONLY if: [ma1a] = '1'</p>  | <p>You said you were interested in treatment with methadone. How difficult will it be for you to initiate such treatment on a scale from 0 to 10 (0 = not difficult at all; 10 = very difficult)? U, K:ma1bru</p>                                                                                                                                                                                                                                                               | <p>radio</p> <table border="1"> <tr> <td>0</td> <td>0 = Not difficult at all</td> </tr> <tr> <td>1</td> <td>1</td> </tr> <tr> <td>2</td> <td>2</td> </tr> <tr> <td>3</td> <td>3</td> </tr> <tr> <td>4</td> <td>4</td> </tr> <tr> <td>5</td> <td>5</td> </tr> <tr> <td>6</td> <td>6</td> </tr> <tr> <td>7</td> <td>7</td> </tr> <tr> <td>8</td> <td>8</td> </tr> <tr> <td>9</td> <td>9</td> </tr> <tr> <td>10</td> <td>10 = Very difficult</td> </tr> </table>                                                                                                                                                                                                                                                                                                                                                                                                                                                                                                                                                                                                                                                                                                                                                                                                                                                                                                                                                                | 0 | 0 = Not difficult at all | 1                      | 1  | 2        | 2                                                                | 3 | 3        | 4                                 | 4 | 5        | 5                                                  | 6 | 6        | 7                                              | 7 | 8        | 8                                | 9 | 9        | 10                                        | 10 = Very difficult |          |                                                         |   |          |                                                               |    |           |                                        |    |           |                                          |    |           |                                        |    |           |                                                             |    |           |                                          |
| 0   | 0 = Not difficult at all                                 |                                                                                                                                                                                                                                                                                                                                                                                                                                                                                 |                                                                                                                                                                                                                                                                                                                                                                                                                                                                                                                                                                                                                                                                                                                                                                                                                                                                                                                                                                                                                                                                                                                                                                                                                                                                                                                                                                                                                              |   |                          |                        |    |          |                                                                  |   |          |                                   |   |          |                                                    |   |          |                                                |   |          |                                  |   |          |                                           |                     |          |                                                         |   |          |                                                               |    |           |                                        |    |           |                                          |    |           |                                        |    |           |                                                             |    |           |                                          |
| 1   | 1                                                        |                                                                                                                                                                                                                                                                                                                                                                                                                                                                                 |                                                                                                                                                                                                                                                                                                                                                                                                                                                                                                                                                                                                                                                                                                                                                                                                                                                                                                                                                                                                                                                                                                                                                                                                                                                                                                                                                                                                                              |   |                          |                        |    |          |                                                                  |   |          |                                   |   |          |                                                    |   |          |                                                |   |          |                                  |   |          |                                           |                     |          |                                                         |   |          |                                                               |    |           |                                        |    |           |                                          |    |           |                                        |    |           |                                                             |    |           |                                          |
| 2   | 2                                                        |                                                                                                                                                                                                                                                                                                                                                                                                                                                                                 |                                                                                                                                                                                                                                                                                                                                                                                                                                                                                                                                                                                                                                                                                                                                                                                                                                                                                                                                                                                                                                                                                                                                                                                                                                                                                                                                                                                                                              |   |                          |                        |    |          |                                                                  |   |          |                                   |   |          |                                                    |   |          |                                                |   |          |                                  |   |          |                                           |                     |          |                                                         |   |          |                                                               |    |           |                                        |    |           |                                          |    |           |                                        |    |           |                                                             |    |           |                                          |
| 3   | 3                                                        |                                                                                                                                                                                                                                                                                                                                                                                                                                                                                 |                                                                                                                                                                                                                                                                                                                                                                                                                                                                                                                                                                                                                                                                                                                                                                                                                                                                                                                                                                                                                                                                                                                                                                                                                                                                                                                                                                                                                              |   |                          |                        |    |          |                                                                  |   |          |                                   |   |          |                                                    |   |          |                                                |   |          |                                  |   |          |                                           |                     |          |                                                         |   |          |                                                               |    |           |                                        |    |           |                                          |    |           |                                        |    |           |                                                             |    |           |                                          |
| 4   | 4                                                        |                                                                                                                                                                                                                                                                                                                                                                                                                                                                                 |                                                                                                                                                                                                                                                                                                                                                                                                                                                                                                                                                                                                                                                                                                                                                                                                                                                                                                                                                                                                                                                                                                                                                                                                                                                                                                                                                                                                                              |   |                          |                        |    |          |                                                                  |   |          |                                   |   |          |                                                    |   |          |                                                |   |          |                                  |   |          |                                           |                     |          |                                                         |   |          |                                                               |    |           |                                        |    |           |                                          |    |           |                                        |    |           |                                                             |    |           |                                          |
| 5   | 5                                                        |                                                                                                                                                                                                                                                                                                                                                                                                                                                                                 |                                                                                                                                                                                                                                                                                                                                                                                                                                                                                                                                                                                                                                                                                                                                                                                                                                                                                                                                                                                                                                                                                                                                                                                                                                                                                                                                                                                                                              |   |                          |                        |    |          |                                                                  |   |          |                                   |   |          |                                                    |   |          |                                                |   |          |                                  |   |          |                                           |                     |          |                                                         |   |          |                                                               |    |           |                                        |    |           |                                          |    |           |                                        |    |           |                                                             |    |           |                                          |
| 6   | 6                                                        |                                                                                                                                                                                                                                                                                                                                                                                                                                                                                 |                                                                                                                                                                                                                                                                                                                                                                                                                                                                                                                                                                                                                                                                                                                                                                                                                                                                                                                                                                                                                                                                                                                                                                                                                                                                                                                                                                                                                              |   |                          |                        |    |          |                                                                  |   |          |                                   |   |          |                                                    |   |          |                                                |   |          |                                  |   |          |                                           |                     |          |                                                         |   |          |                                                               |    |           |                                        |    |           |                                          |    |           |                                        |    |           |                                                             |    |           |                                          |
| 7   | 7                                                        |                                                                                                                                                                                                                                                                                                                                                                                                                                                                                 |                                                                                                                                                                                                                                                                                                                                                                                                                                                                                                                                                                                                                                                                                                                                                                                                                                                                                                                                                                                                                                                                                                                                                                                                                                                                                                                                                                                                                              |   |                          |                        |    |          |                                                                  |   |          |                                   |   |          |                                                    |   |          |                                                |   |          |                                  |   |          |                                           |                     |          |                                                         |   |          |                                                               |    |           |                                        |    |           |                                          |    |           |                                        |    |           |                                                             |    |           |                                          |
| 8   | 8                                                        |                                                                                                                                                                                                                                                                                                                                                                                                                                                                                 |                                                                                                                                                                                                                                                                                                                                                                                                                                                                                                                                                                                                                                                                                                                                                                                                                                                                                                                                                                                                                                                                                                                                                                                                                                                                                                                                                                                                                              |   |                          |                        |    |          |                                                                  |   |          |                                   |   |          |                                                    |   |          |                                                |   |          |                                  |   |          |                                           |                     |          |                                                         |   |          |                                                               |    |           |                                        |    |           |                                          |    |           |                                        |    |           |                                                             |    |           |                                          |
| 9   | 9                                                        |                                                                                                                                                                                                                                                                                                                                                                                                                                                                                 |                                                                                                                                                                                                                                                                                                                                                                                                                                                                                                                                                                                                                                                                                                                                                                                                                                                                                                                                                                                                                                                                                                                                                                                                                                                                                                                                                                                                                              |   |                          |                        |    |          |                                                                  |   |          |                                   |   |          |                                                    |   |          |                                                |   |          |                                  |   |          |                                           |                     |          |                                                         |   |          |                                                               |    |           |                                        |    |           |                                          |    |           |                                        |    |           |                                                             |    |           |                                          |
| 10  | 10 = Very difficult                                      |                                                                                                                                                                                                                                                                                                                                                                                                                                                                                 |                                                                                                                                                                                                                                                                                                                                                                                                                                                                                                                                                                                                                                                                                                                                                                                                                                                                                                                                                                                                                                                                                                                                                                                                                                                                                                                                                                                                                              |   |                          |                        |    |          |                                                                  |   |          |                                   |   |          |                                                    |   |          |                                                |   |          |                                  |   |          |                                           |                     |          |                                                         |   |          |                                                               |    |           |                                        |    |           |                                          |    |           |                                        |    |           |                                                             |    |           |                                          |
| 322 | <p>melabel</p> <p>Show the field ONLY if: [ma6]&gt;0</p> | <p>Section Header: <i>OST: Program Experience(Previously on OST)</i></p> <p>The next series of questions are going to ask you about your experiences with methadone or buprenorphine. By methadone/buprenorphine treatment program, we mean receiving methadone/buprenorphine in sites of OST on a regular basis and taking it orally to treat addiction. You may have different experience in treatment, both negative and positive. We value your honest answers. @HIDDEN</p> | <p>descriptive</p>                                                                                                                                                                                                                                                                                                                                                                                                                                                                                                                                                                                                                                                                                                                                                                                                                                                                                                                                                                                                                                                                                                                                                                                                                                                                                                                                                                                                           |   |                          |                        |    |          |                                                                  |   |          |                                   |   |          |                                                    |   |          |                                                |   |          |                                  |   |          |                                           |                     |          |                                                         |   |          |                                                               |    |           |                                        |    |           |                                          |    |           |                                        |    |           |                                                             |    |           |                                          |

|     |                                                                |                                                                                                           |                                                                                                                                                                                                                                                                                                                                                                                                                                                                                                                                                                                                                                                                                                                                                                                                                                                                                                                                                                                                                                                                                                                                                                                                                                                                                                                                                                                                                                                                                                                                                                                                                                                                                                                                                                      |   |        |                               |   |        |                                                          |   |        |                                                             |   |        |                                                       |   |        |                                                                |   |        |                                              |   |        |                                                 |   |        |                                           |   |        |                               |    |         |                                     |    |         |                                                     |    |         |                                                      |    |         |                                                                   |    |         |                               |    |         |           |    |         |                                                  |    |         |                                                                                |    |         |                                 |
|-----|----------------------------------------------------------------|-----------------------------------------------------------------------------------------------------------|----------------------------------------------------------------------------------------------------------------------------------------------------------------------------------------------------------------------------------------------------------------------------------------------------------------------------------------------------------------------------------------------------------------------------------------------------------------------------------------------------------------------------------------------------------------------------------------------------------------------------------------------------------------------------------------------------------------------------------------------------------------------------------------------------------------------------------------------------------------------------------------------------------------------------------------------------------------------------------------------------------------------------------------------------------------------------------------------------------------------------------------------------------------------------------------------------------------------------------------------------------------------------------------------------------------------------------------------------------------------------------------------------------------------------------------------------------------------------------------------------------------------------------------------------------------------------------------------------------------------------------------------------------------------------------------------------------------------------------------------------------------------|---|--------|-------------------------------|---|--------|----------------------------------------------------------|---|--------|-------------------------------------------------------------|---|--------|-------------------------------------------------------|---|--------|----------------------------------------------------------------|---|--------|----------------------------------------------|---|--------|-------------------------------------------------|---|--------|-------------------------------------------|---|--------|-------------------------------|----|---------|-------------------------------------|----|---------|-----------------------------------------------------|----|---------|------------------------------------------------------|----|---------|-------------------------------------------------------------------|----|---------|-------------------------------|----|---------|-----------|----|---------|--------------------------------------------------|----|---------|--------------------------------------------------------------------------------|----|---------|---------------------------------|
| 323 | <p>me1</p> <p>Show the field ONLY if:<br/>[ma6]&gt;0</p>       | <p>1. What were your reasons to begin methadone program<br/>[check all that apply] U, K:me1ru me1ruf1</p> | <p>checkbox</p> <table border="1"> <tr><td>1</td><td>me1__1</td><td>I wanted to improve my health</td></tr> <tr><td>2</td><td>me1__2</td><td>I wanted to make a change in the circles I was moving in</td></tr> <tr><td>3</td><td>me1__3</td><td>I wanted to reduce my drug use because I was using too much</td></tr> <tr><td>4</td><td>me1__4</td><td>I wanted to end my use of illegal opioids permanently</td></tr> <tr><td>5</td><td>me1__5</td><td>I needed a break from my habit because my life was too chaotic</td></tr> <tr><td>6</td><td>me1__6</td><td>Financing drug consumption was too expensive</td></tr> <tr><td>7</td><td>me1__7</td><td>I wanted to stop committing crimes for my habit</td></tr> <tr><td>8</td><td>me1__8</td><td>I wanted to take better care of my family</td></tr> <tr><td>9</td><td>me1__9</td><td>I was afraid of losing my job</td></tr> <tr><td>10</td><td>me1__10</td><td>I wanted to (be able to) work again</td></tr> <tr><td>11</td><td>me1__11</td><td>I wanted to get clean so I could get my HIV treated</td></tr> <tr><td>12</td><td>me1__12</td><td>I was concerned of being arrested again / imprisoned</td></tr> <tr><td>13</td><td>me1__13</td><td>I was worried about getting an infection or contracting a disease</td></tr> <tr><td>14</td><td>me1__14</td><td>I was afraid I might overdose</td></tr> <tr><td>15</td><td>me1__15</td><td>Pregnancy</td></tr> <tr><td>16</td><td>me1__16</td><td>My family wanted me to start methadone treatment</td></tr> <tr><td>17</td><td>me1__17</td><td>Someone else wanted me to start methadone treatment (please specify who _____)</td></tr> <tr><td>18</td><td>me1__18</td><td>Other (please specify)<br/>_____</td></tr> </table> <p>Custom alignment: LV</p> | 1 | me1__1 | I wanted to improve my health | 2 | me1__2 | I wanted to make a change in the circles I was moving in | 3 | me1__3 | I wanted to reduce my drug use because I was using too much | 4 | me1__4 | I wanted to end my use of illegal opioids permanently | 5 | me1__5 | I needed a break from my habit because my life was too chaotic | 6 | me1__6 | Financing drug consumption was too expensive | 7 | me1__7 | I wanted to stop committing crimes for my habit | 8 | me1__8 | I wanted to take better care of my family | 9 | me1__9 | I was afraid of losing my job | 10 | me1__10 | I wanted to (be able to) work again | 11 | me1__11 | I wanted to get clean so I could get my HIV treated | 12 | me1__12 | I was concerned of being arrested again / imprisoned | 13 | me1__13 | I was worried about getting an infection or contracting a disease | 14 | me1__14 | I was afraid I might overdose | 15 | me1__15 | Pregnancy | 16 | me1__16 | My family wanted me to start methadone treatment | 17 | me1__17 | Someone else wanted me to start methadone treatment (please specify who _____) | 18 | me1__18 | Other (please specify)<br>_____ |
| 1   | me1__1                                                         | I wanted to improve my health                                                                             |                                                                                                                                                                                                                                                                                                                                                                                                                                                                                                                                                                                                                                                                                                                                                                                                                                                                                                                                                                                                                                                                                                                                                                                                                                                                                                                                                                                                                                                                                                                                                                                                                                                                                                                                                                      |   |        |                               |   |        |                                                          |   |        |                                                             |   |        |                                                       |   |        |                                                                |   |        |                                              |   |        |                                                 |   |        |                                           |   |        |                               |    |         |                                     |    |         |                                                     |    |         |                                                      |    |         |                                                                   |    |         |                               |    |         |           |    |         |                                                  |    |         |                                                                                |    |         |                                 |
| 2   | me1__2                                                         | I wanted to make a change in the circles I was moving in                                                  |                                                                                                                                                                                                                                                                                                                                                                                                                                                                                                                                                                                                                                                                                                                                                                                                                                                                                                                                                                                                                                                                                                                                                                                                                                                                                                                                                                                                                                                                                                                                                                                                                                                                                                                                                                      |   |        |                               |   |        |                                                          |   |        |                                                             |   |        |                                                       |   |        |                                                                |   |        |                                              |   |        |                                                 |   |        |                                           |   |        |                               |    |         |                                     |    |         |                                                     |    |         |                                                      |    |         |                                                                   |    |         |                               |    |         |           |    |         |                                                  |    |         |                                                                                |    |         |                                 |
| 3   | me1__3                                                         | I wanted to reduce my drug use because I was using too much                                               |                                                                                                                                                                                                                                                                                                                                                                                                                                                                                                                                                                                                                                                                                                                                                                                                                                                                                                                                                                                                                                                                                                                                                                                                                                                                                                                                                                                                                                                                                                                                                                                                                                                                                                                                                                      |   |        |                               |   |        |                                                          |   |        |                                                             |   |        |                                                       |   |        |                                                                |   |        |                                              |   |        |                                                 |   |        |                                           |   |        |                               |    |         |                                     |    |         |                                                     |    |         |                                                      |    |         |                                                                   |    |         |                               |    |         |           |    |         |                                                  |    |         |                                                                                |    |         |                                 |
| 4   | me1__4                                                         | I wanted to end my use of illegal opioids permanently                                                     |                                                                                                                                                                                                                                                                                                                                                                                                                                                                                                                                                                                                                                                                                                                                                                                                                                                                                                                                                                                                                                                                                                                                                                                                                                                                                                                                                                                                                                                                                                                                                                                                                                                                                                                                                                      |   |        |                               |   |        |                                                          |   |        |                                                             |   |        |                                                       |   |        |                                                                |   |        |                                              |   |        |                                                 |   |        |                                           |   |        |                               |    |         |                                     |    |         |                                                     |    |         |                                                      |    |         |                                                                   |    |         |                               |    |         |           |    |         |                                                  |    |         |                                                                                |    |         |                                 |
| 5   | me1__5                                                         | I needed a break from my habit because my life was too chaotic                                            |                                                                                                                                                                                                                                                                                                                                                                                                                                                                                                                                                                                                                                                                                                                                                                                                                                                                                                                                                                                                                                                                                                                                                                                                                                                                                                                                                                                                                                                                                                                                                                                                                                                                                                                                                                      |   |        |                               |   |        |                                                          |   |        |                                                             |   |        |                                                       |   |        |                                                                |   |        |                                              |   |        |                                                 |   |        |                                           |   |        |                               |    |         |                                     |    |         |                                                     |    |         |                                                      |    |         |                                                                   |    |         |                               |    |         |           |    |         |                                                  |    |         |                                                                                |    |         |                                 |
| 6   | me1__6                                                         | Financing drug consumption was too expensive                                                              |                                                                                                                                                                                                                                                                                                                                                                                                                                                                                                                                                                                                                                                                                                                                                                                                                                                                                                                                                                                                                                                                                                                                                                                                                                                                                                                                                                                                                                                                                                                                                                                                                                                                                                                                                                      |   |        |                               |   |        |                                                          |   |        |                                                             |   |        |                                                       |   |        |                                                                |   |        |                                              |   |        |                                                 |   |        |                                           |   |        |                               |    |         |                                     |    |         |                                                     |    |         |                                                      |    |         |                                                                   |    |         |                               |    |         |           |    |         |                                                  |    |         |                                                                                |    |         |                                 |
| 7   | me1__7                                                         | I wanted to stop committing crimes for my habit                                                           |                                                                                                                                                                                                                                                                                                                                                                                                                                                                                                                                                                                                                                                                                                                                                                                                                                                                                                                                                                                                                                                                                                                                                                                                                                                                                                                                                                                                                                                                                                                                                                                                                                                                                                                                                                      |   |        |                               |   |        |                                                          |   |        |                                                             |   |        |                                                       |   |        |                                                                |   |        |                                              |   |        |                                                 |   |        |                                           |   |        |                               |    |         |                                     |    |         |                                                     |    |         |                                                      |    |         |                                                                   |    |         |                               |    |         |           |    |         |                                                  |    |         |                                                                                |    |         |                                 |
| 8   | me1__8                                                         | I wanted to take better care of my family                                                                 |                                                                                                                                                                                                                                                                                                                                                                                                                                                                                                                                                                                                                                                                                                                                                                                                                                                                                                                                                                                                                                                                                                                                                                                                                                                                                                                                                                                                                                                                                                                                                                                                                                                                                                                                                                      |   |        |                               |   |        |                                                          |   |        |                                                             |   |        |                                                       |   |        |                                                                |   |        |                                              |   |        |                                                 |   |        |                                           |   |        |                               |    |         |                                     |    |         |                                                     |    |         |                                                      |    |         |                                                                   |    |         |                               |    |         |           |    |         |                                                  |    |         |                                                                                |    |         |                                 |
| 9   | me1__9                                                         | I was afraid of losing my job                                                                             |                                                                                                                                                                                                                                                                                                                                                                                                                                                                                                                                                                                                                                                                                                                                                                                                                                                                                                                                                                                                                                                                                                                                                                                                                                                                                                                                                                                                                                                                                                                                                                                                                                                                                                                                                                      |   |        |                               |   |        |                                                          |   |        |                                                             |   |        |                                                       |   |        |                                                                |   |        |                                              |   |        |                                                 |   |        |                                           |   |        |                               |    |         |                                     |    |         |                                                     |    |         |                                                      |    |         |                                                                   |    |         |                               |    |         |           |    |         |                                                  |    |         |                                                                                |    |         |                                 |
| 10  | me1__10                                                        | I wanted to (be able to) work again                                                                       |                                                                                                                                                                                                                                                                                                                                                                                                                                                                                                                                                                                                                                                                                                                                                                                                                                                                                                                                                                                                                                                                                                                                                                                                                                                                                                                                                                                                                                                                                                                                                                                                                                                                                                                                                                      |   |        |                               |   |        |                                                          |   |        |                                                             |   |        |                                                       |   |        |                                                                |   |        |                                              |   |        |                                                 |   |        |                                           |   |        |                               |    |         |                                     |    |         |                                                     |    |         |                                                      |    |         |                                                                   |    |         |                               |    |         |           |    |         |                                                  |    |         |                                                                                |    |         |                                 |
| 11  | me1__11                                                        | I wanted to get clean so I could get my HIV treated                                                       |                                                                                                                                                                                                                                                                                                                                                                                                                                                                                                                                                                                                                                                                                                                                                                                                                                                                                                                                                                                                                                                                                                                                                                                                                                                                                                                                                                                                                                                                                                                                                                                                                                                                                                                                                                      |   |        |                               |   |        |                                                          |   |        |                                                             |   |        |                                                       |   |        |                                                                |   |        |                                              |   |        |                                                 |   |        |                                           |   |        |                               |    |         |                                     |    |         |                                                     |    |         |                                                      |    |         |                                                                   |    |         |                               |    |         |           |    |         |                                                  |    |         |                                                                                |    |         |                                 |
| 12  | me1__12                                                        | I was concerned of being arrested again / imprisoned                                                      |                                                                                                                                                                                                                                                                                                                                                                                                                                                                                                                                                                                                                                                                                                                                                                                                                                                                                                                                                                                                                                                                                                                                                                                                                                                                                                                                                                                                                                                                                                                                                                                                                                                                                                                                                                      |   |        |                               |   |        |                                                          |   |        |                                                             |   |        |                                                       |   |        |                                                                |   |        |                                              |   |        |                                                 |   |        |                                           |   |        |                               |    |         |                                     |    |         |                                                     |    |         |                                                      |    |         |                                                                   |    |         |                               |    |         |           |    |         |                                                  |    |         |                                                                                |    |         |                                 |
| 13  | me1__13                                                        | I was worried about getting an infection or contracting a disease                                         |                                                                                                                                                                                                                                                                                                                                                                                                                                                                                                                                                                                                                                                                                                                                                                                                                                                                                                                                                                                                                                                                                                                                                                                                                                                                                                                                                                                                                                                                                                                                                                                                                                                                                                                                                                      |   |        |                               |   |        |                                                          |   |        |                                                             |   |        |                                                       |   |        |                                                                |   |        |                                              |   |        |                                                 |   |        |                                           |   |        |                               |    |         |                                     |    |         |                                                     |    |         |                                                      |    |         |                                                                   |    |         |                               |    |         |           |    |         |                                                  |    |         |                                                                                |    |         |                                 |
| 14  | me1__14                                                        | I was afraid I might overdose                                                                             |                                                                                                                                                                                                                                                                                                                                                                                                                                                                                                                                                                                                                                                                                                                                                                                                                                                                                                                                                                                                                                                                                                                                                                                                                                                                                                                                                                                                                                                                                                                                                                                                                                                                                                                                                                      |   |        |                               |   |        |                                                          |   |        |                                                             |   |        |                                                       |   |        |                                                                |   |        |                                              |   |        |                                                 |   |        |                                           |   |        |                               |    |         |                                     |    |         |                                                     |    |         |                                                      |    |         |                                                                   |    |         |                               |    |         |           |    |         |                                                  |    |         |                                                                                |    |         |                                 |
| 15  | me1__15                                                        | Pregnancy                                                                                                 |                                                                                                                                                                                                                                                                                                                                                                                                                                                                                                                                                                                                                                                                                                                                                                                                                                                                                                                                                                                                                                                                                                                                                                                                                                                                                                                                                                                                                                                                                                                                                                                                                                                                                                                                                                      |   |        |                               |   |        |                                                          |   |        |                                                             |   |        |                                                       |   |        |                                                                |   |        |                                              |   |        |                                                 |   |        |                                           |   |        |                               |    |         |                                     |    |         |                                                     |    |         |                                                      |    |         |                                                                   |    |         |                               |    |         |           |    |         |                                                  |    |         |                                                                                |    |         |                                 |
| 16  | me1__16                                                        | My family wanted me to start methadone treatment                                                          |                                                                                                                                                                                                                                                                                                                                                                                                                                                                                                                                                                                                                                                                                                                                                                                                                                                                                                                                                                                                                                                                                                                                                                                                                                                                                                                                                                                                                                                                                                                                                                                                                                                                                                                                                                      |   |        |                               |   |        |                                                          |   |        |                                                             |   |        |                                                       |   |        |                                                                |   |        |                                              |   |        |                                                 |   |        |                                           |   |        |                               |    |         |                                     |    |         |                                                     |    |         |                                                      |    |         |                                                                   |    |         |                               |    |         |           |    |         |                                                  |    |         |                                                                                |    |         |                                 |
| 17  | me1__17                                                        | Someone else wanted me to start methadone treatment (please specify who _____)                            |                                                                                                                                                                                                                                                                                                                                                                                                                                                                                                                                                                                                                                                                                                                                                                                                                                                                                                                                                                                                                                                                                                                                                                                                                                                                                                                                                                                                                                                                                                                                                                                                                                                                                                                                                                      |   |        |                               |   |        |                                                          |   |        |                                                             |   |        |                                                       |   |        |                                                                |   |        |                                              |   |        |                                                 |   |        |                                           |   |        |                               |    |         |                                     |    |         |                                                     |    |         |                                                      |    |         |                                                                   |    |         |                               |    |         |           |    |         |                                                  |    |         |                                                                                |    |         |                                 |
| 18  | me1__18                                                        | Other (please specify)<br>_____                                                                           |                                                                                                                                                                                                                                                                                                                                                                                                                                                                                                                                                                                                                                                                                                                                                                                                                                                                                                                                                                                                                                                                                                                                                                                                                                                                                                                                                                                                                                                                                                                                                                                                                                                                                                                                                                      |   |        |                               |   |        |                                                          |   |        |                                                             |   |        |                                                       |   |        |                                                                |   |        |                                              |   |        |                                                 |   |        |                                           |   |        |                               |    |         |                                     |    |         |                                                     |    |         |                                                      |    |         |                                                                   |    |         |                               |    |         |           |    |         |                                                  |    |         |                                                                                |    |         |                                 |
| 324 | <p>me1q</p> <p>Show the field ONLY if:<br/>[me1(17)] = '1'</p> | <p>Someone else wanted me to start methadone treatment (please specify who ) U, K:me1qru me1qruf1</p>     | <p>text</p>                                                                                                                                                                                                                                                                                                                                                                                                                                                                                                                                                                                                                                                                                                                                                                                                                                                                                                                                                                                                                                                                                                                                                                                                                                                                                                                                                                                                                                                                                                                                                                                                                                                                                                                                                          |   |        |                               |   |        |                                                          |   |        |                                                             |   |        |                                                       |   |        |                                                                |   |        |                                              |   |        |                                                 |   |        |                                           |   |        |                               |    |         |                                     |    |         |                                                     |    |         |                                                      |    |         |                                                                   |    |         |                               |    |         |           |    |         |                                                  |    |         |                                                                                |    |         |                                 |
| 325 | <p>me1r</p> <p>Show the field ONLY if:<br/>[me1(18)] = '1'</p> | <p>Other (please specify) __ U:merru K: me1rru me1rruf1</p>                                               | <p>text</p>                                                                                                                                                                                                                                                                                                                                                                                                                                                                                                                                                                                                                                                                                                                                                                                                                                                                                                                                                                                                                                                                                                                                                                                                                                                                                                                                                                                                                                                                                                                                                                                                                                                                                                                                                          |   |        |                               |   |        |                                                          |   |        |                                                             |   |        |                                                       |   |        |                                                                |   |        |                                              |   |        |                                                 |   |        |                                           |   |        |                               |    |         |                                     |    |         |                                                     |    |         |                                                      |    |         |                                                                   |    |         |                               |    |         |           |    |         |                                                  |    |         |                                                                                |    |         |                                 |

|     |                                                                                             |                                                                                                                                                                      |                                                                                                                                                                                                                                                                                                                                                                                                                                                                                                                                                                                                                                                                                                                                                                    |   |                |                    |    |                |                     |   |                |                       |   |                |                         |   |                |                       |   |                |                         |   |                |                   |    |                 |                  |    |                 |                           |    |         |              |    |         |                           |
|-----|---------------------------------------------------------------------------------------------|----------------------------------------------------------------------------------------------------------------------------------------------------------------------|--------------------------------------------------------------------------------------------------------------------------------------------------------------------------------------------------------------------------------------------------------------------------------------------------------------------------------------------------------------------------------------------------------------------------------------------------------------------------------------------------------------------------------------------------------------------------------------------------------------------------------------------------------------------------------------------------------------------------------------------------------------------|---|----------------|--------------------|----|----------------|---------------------|---|----------------|-----------------------|---|----------------|-------------------------|---|----------------|-----------------------|---|----------------|-------------------------|---|----------------|-------------------|----|-----------------|------------------|----|-----------------|---------------------------|----|---------|--------------|----|---------|---------------------------|
| 326 | me2<br>Show the field ONLY if: [ma6]>0                                                      | 2. Where did you obtain information about OST program prior to your start of the program? (check all that apply. U, K:me2ru me2ruf1                                  | checkbox<br><table border="1"> <tr><td>1</td><td>me2__1</td><td>A. Probation staff</td></tr> <tr><td>2</td><td>me2__2</td><td>B. Probation doctor</td></tr> <tr><td>3</td><td>me2__3</td><td>C. Doctors</td></tr> <tr><td>4</td><td>me2__4</td><td>D. Friends</td></tr> <tr><td>5</td><td>me2__5</td><td>E. Other OST patients</td></tr> <tr><td>6</td><td>me2__6</td><td>F. People who use drugs</td></tr> <tr><td>7</td><td>me2__7</td><td>G. Prisoners</td></tr> <tr><td>8</td><td>me2__8</td><td>H. Psychologists</td></tr> <tr><td>9</td><td>me2__9</td><td>I. Family members</td></tr> <tr><td>10</td><td>me2__10</td><td>J. NGO staff</td></tr> <tr><td>11</td><td>me2__11</td><td>K. Other (specify): _____</td></tr> </table> <p>Custom alignment: LV</p> | 1 | me2__1         | A. Probation staff | 2  | me2__2         | B. Probation doctor | 3 | me2__3         | C. Doctors            | 4 | me2__4         | D. Friends              | 5 | me2__5         | E. Other OST patients | 6 | me2__6         | F. People who use drugs | 7 | me2__7         | G. Prisoners      | 8  | me2__8          | H. Psychologists | 9  | me2__9          | I. Family members         | 10 | me2__10 | J. NGO staff | 11 | me2__11 | K. Other (specify): _____ |
| 1   | me2__1                                                                                      | A. Probation staff                                                                                                                                                   |                                                                                                                                                                                                                                                                                                                                                                                                                                                                                                                                                                                                                                                                                                                                                                    |   |                |                    |    |                |                     |   |                |                       |   |                |                         |   |                |                       |   |                |                         |   |                |                   |    |                 |                  |    |                 |                           |    |         |              |    |         |                           |
| 2   | me2__2                                                                                      | B. Probation doctor                                                                                                                                                  |                                                                                                                                                                                                                                                                                                                                                                                                                                                                                                                                                                                                                                                                                                                                                                    |   |                |                    |    |                |                     |   |                |                       |   |                |                         |   |                |                       |   |                |                         |   |                |                   |    |                 |                  |    |                 |                           |    |         |              |    |         |                           |
| 3   | me2__3                                                                                      | C. Doctors                                                                                                                                                           |                                                                                                                                                                                                                                                                                                                                                                                                                                                                                                                                                                                                                                                                                                                                                                    |   |                |                    |    |                |                     |   |                |                       |   |                |                         |   |                |                       |   |                |                         |   |                |                   |    |                 |                  |    |                 |                           |    |         |              |    |         |                           |
| 4   | me2__4                                                                                      | D. Friends                                                                                                                                                           |                                                                                                                                                                                                                                                                                                                                                                                                                                                                                                                                                                                                                                                                                                                                                                    |   |                |                    |    |                |                     |   |                |                       |   |                |                         |   |                |                       |   |                |                         |   |                |                   |    |                 |                  |    |                 |                           |    |         |              |    |         |                           |
| 5   | me2__5                                                                                      | E. Other OST patients                                                                                                                                                |                                                                                                                                                                                                                                                                                                                                                                                                                                                                                                                                                                                                                                                                                                                                                                    |   |                |                    |    |                |                     |   |                |                       |   |                |                         |   |                |                       |   |                |                         |   |                |                   |    |                 |                  |    |                 |                           |    |         |              |    |         |                           |
| 6   | me2__6                                                                                      | F. People who use drugs                                                                                                                                              |                                                                                                                                                                                                                                                                                                                                                                                                                                                                                                                                                                                                                                                                                                                                                                    |   |                |                    |    |                |                     |   |                |                       |   |                |                         |   |                |                       |   |                |                         |   |                |                   |    |                 |                  |    |                 |                           |    |         |              |    |         |                           |
| 7   | me2__7                                                                                      | G. Prisoners                                                                                                                                                         |                                                                                                                                                                                                                                                                                                                                                                                                                                                                                                                                                                                                                                                                                                                                                                    |   |                |                    |    |                |                     |   |                |                       |   |                |                         |   |                |                       |   |                |                         |   |                |                   |    |                 |                  |    |                 |                           |    |         |              |    |         |                           |
| 8   | me2__8                                                                                      | H. Psychologists                                                                                                                                                     |                                                                                                                                                                                                                                                                                                                                                                                                                                                                                                                                                                                                                                                                                                                                                                    |   |                |                    |    |                |                     |   |                |                       |   |                |                         |   |                |                       |   |                |                         |   |                |                   |    |                 |                  |    |                 |                           |    |         |              |    |         |                           |
| 9   | me2__9                                                                                      | I. Family members                                                                                                                                                    |                                                                                                                                                                                                                                                                                                                                                                                                                                                                                                                                                                                                                                                                                                                                                                    |   |                |                    |    |                |                     |   |                |                       |   |                |                         |   |                |                       |   |                |                         |   |                |                   |    |                 |                  |    |                 |                           |    |         |              |    |         |                           |
| 10  | me2__10                                                                                     | J. NGO staff                                                                                                                                                         |                                                                                                                                                                                                                                                                                                                                                                                                                                                                                                                                                                                                                                                                                                                                                                    |   |                |                    |    |                |                     |   |                |                       |   |                |                         |   |                |                       |   |                |                         |   |                |                   |    |                 |                  |    |                 |                           |    |         |              |    |         |                           |
| 11  | me2__11                                                                                     | K. Other (specify): _____                                                                                                                                            |                                                                                                                                                                                                                                                                                                                                                                                                                                                                                                                                                                                                                                                                                                                                                                    |   |                |                    |    |                |                     |   |                |                       |   |                |                         |   |                |                       |   |                |                         |   |                |                   |    |                 |                  |    |                 |                           |    |         |              |    |         |                           |
| 327 | me2_partner<br>Show the field ONLY if: [ma6] > 0 and [index_partner] = '2'                  | ME2. Where did you obtain information about OST program prior to your start of the program? (check all that apply)                                                   | checkbox<br><table border="1"> <tr><td>3</td><td>me2_partner__3</td><td>A. Doctors</td></tr> <tr><td>4</td><td>me2_partner__4</td><td>B. Friends</td></tr> <tr><td>5</td><td>me2_partner__5</td><td>C. Other OST patients</td></tr> <tr><td>6</td><td>me2_partner__6</td><td>D. People who use drugs</td></tr> <tr><td>7</td><td>me2_partner__7</td><td>E. Prisoners</td></tr> <tr><td>8</td><td>me2_partner__8</td><td>F. Psychologists</td></tr> <tr><td>9</td><td>me2_partner__9</td><td>G. Family members</td></tr> <tr><td>10</td><td>me2_partner__10</td><td>H. NGO staff</td></tr> <tr><td>11</td><td>me2_partner__11</td><td>I. Other (specify): _____</td></tr> </table> <p>Custom alignment: LV</p>                                                      | 3 | me2_partner__3 | A. Doctors         | 4  | me2_partner__4 | B. Friends          | 5 | me2_partner__5 | C. Other OST patients | 6 | me2_partner__6 | D. People who use drugs | 7 | me2_partner__7 | E. Prisoners          | 8 | me2_partner__8 | F. Psychologists        | 9 | me2_partner__9 | G. Family members | 10 | me2_partner__10 | H. NGO staff     | 11 | me2_partner__11 | I. Other (specify): _____ |    |         |              |    |         |                           |
| 3   | me2_partner__3                                                                              | A. Doctors                                                                                                                                                           |                                                                                                                                                                                                                                                                                                                                                                                                                                                                                                                                                                                                                                                                                                                                                                    |   |                |                    |    |                |                     |   |                |                       |   |                |                         |   |                |                       |   |                |                         |   |                |                   |    |                 |                  |    |                 |                           |    |         |              |    |         |                           |
| 4   | me2_partner__4                                                                              | B. Friends                                                                                                                                                           |                                                                                                                                                                                                                                                                                                                                                                                                                                                                                                                                                                                                                                                                                                                                                                    |   |                |                    |    |                |                     |   |                |                       |   |                |                         |   |                |                       |   |                |                         |   |                |                   |    |                 |                  |    |                 |                           |    |         |              |    |         |                           |
| 5   | me2_partner__5                                                                              | C. Other OST patients                                                                                                                                                |                                                                                                                                                                                                                                                                                                                                                                                                                                                                                                                                                                                                                                                                                                                                                                    |   |                |                    |    |                |                     |   |                |                       |   |                |                         |   |                |                       |   |                |                         |   |                |                   |    |                 |                  |    |                 |                           |    |         |              |    |         |                           |
| 6   | me2_partner__6                                                                              | D. People who use drugs                                                                                                                                              |                                                                                                                                                                                                                                                                                                                                                                                                                                                                                                                                                                                                                                                                                                                                                                    |   |                |                    |    |                |                     |   |                |                       |   |                |                         |   |                |                       |   |                |                         |   |                |                   |    |                 |                  |    |                 |                           |    |         |              |    |         |                           |
| 7   | me2_partner__7                                                                              | E. Prisoners                                                                                                                                                         |                                                                                                                                                                                                                                                                                                                                                                                                                                                                                                                                                                                                                                                                                                                                                                    |   |                |                    |    |                |                     |   |                |                       |   |                |                         |   |                |                       |   |                |                         |   |                |                   |    |                 |                  |    |                 |                           |    |         |              |    |         |                           |
| 8   | me2_partner__8                                                                              | F. Psychologists                                                                                                                                                     |                                                                                                                                                                                                                                                                                                                                                                                                                                                                                                                                                                                                                                                                                                                                                                    |   |                |                    |    |                |                     |   |                |                       |   |                |                         |   |                |                       |   |                |                         |   |                |                   |    |                 |                  |    |                 |                           |    |         |              |    |         |                           |
| 9   | me2_partner__9                                                                              | G. Family members                                                                                                                                                    |                                                                                                                                                                                                                                                                                                                                                                                                                                                                                                                                                                                                                                                                                                                                                                    |   |                |                    |    |                |                     |   |                |                       |   |                |                         |   |                |                       |   |                |                         |   |                |                   |    |                 |                  |    |                 |                           |    |         |              |    |         |                           |
| 10  | me2_partner__10                                                                             | H. NGO staff                                                                                                                                                         |                                                                                                                                                                                                                                                                                                                                                                                                                                                                                                                                                                                                                                                                                                                                                                    |   |                |                    |    |                |                     |   |                |                       |   |                |                         |   |                |                       |   |                |                         |   |                |                   |    |                 |                  |    |                 |                           |    |         |              |    |         |                           |
| 11  | me2_partner__11                                                                             | I. Other (specify): _____                                                                                                                                            |                                                                                                                                                                                                                                                                                                                                                                                                                                                                                                                                                                                                                                                                                                                                                                    |   |                |                    |    |                |                     |   |                |                       |   |                |                         |   |                |                       |   |                |                         |   |                |                   |    |                 |                  |    |                 |                           |    |         |              |    |         |                           |
| 328 | me2oth<br>Show the field ONLY if: [me2(11)] = '1'                                           | Other (specify): U, k:me2othru me2othruf1                                                                                                                            | text                                                                                                                                                                                                                                                                                                                                                                                                                                                                                                                                                                                                                                                                                                                                                               |   |                |                    |    |                |                     |   |                |                       |   |                |                         |   |                |                       |   |                |                         |   |                |                   |    |                 |                  |    |                 |                           |    |         |              |    |         |                           |
| 329 | me2a<br>Show the field ONLY if: [ma6]>0                                                     | 2a. Which of the below mentioned medicines you take, being in the OST program? U: me2aru me2aruf1 K: N/A                                                             | checkbox<br><table border="1"> <tr><td>1</td><td>me2a__1</td><td>Methadone</td></tr> <tr><td>2</td><td>me2a__2</td><td>Buprenorphine</td></tr> </table> <p>Custom alignment: LV</p>                                                                                                                                                                                                                                                                                                                                                                                                                                                                                                                                                                                | 1 | me2a__1        | Methadone          | 2  | me2a__2        | Buprenorphine       |   |                |                       |   |                |                         |   |                |                       |   |                |                         |   |                |                   |    |                 |                  |    |                 |                           |    |         |              |    |         |                           |
| 1   | me2a__1                                                                                     | Methadone                                                                                                                                                            |                                                                                                                                                                                                                                                                                                                                                                                                                                                                                                                                                                                                                                                                                                                                                                    |   |                |                    |    |                |                     |   |                |                       |   |                |                         |   |                |                       |   |                |                         |   |                |                   |    |                 |                  |    |                 |                           |    |         |              |    |         |                           |
| 2   | me2a__2                                                                                     | Buprenorphine                                                                                                                                                        |                                                                                                                                                                                                                                                                                                                                                                                                                                                                                                                                                                                                                                                                                                                                                                    |   |                |                    |    |                |                     |   |                |                       |   |                |                         |   |                |                       |   |                |                         |   |                |                   |    |                 |                  |    |                 |                           |    |         |              |    |         |                           |
| 330 | me3<br>Show the field ONLY if: [ma6]>0                                                      | ME3. Were you ever told at any time that in order to stay on the OST program that you would have to pay someone money to keep receiving your OST? U, K:me3ru me3ruf1 | radio<br><table border="1"> <tr><td>1</td><td>Yes</td></tr> <tr><td>0</td><td>No</td></tr> </table>                                                                                                                                                                                                                                                                                                                                                                                                                                                                                                                                                                                                                                                                | 1 | Yes            | 0                  | No |                |                     |   |                |                       |   |                |                         |   |                |                       |   |                |                         |   |                |                   |    |                 |                  |    |                 |                           |    |         |              |    |         |                           |
| 1   | Yes                                                                                         |                                                                                                                                                                      |                                                                                                                                                                                                                                                                                                                                                                                                                                                                                                                                                                                                                                                                                                                                                                    |   |                |                    |    |                |                     |   |                |                       |   |                |                         |   |                |                       |   |                |                         |   |                |                   |    |                 |                  |    |                 |                           |    |         |              |    |         |                           |
| 0   | No                                                                                          |                                                                                                                                                                      |                                                                                                                                                                                                                                                                                                                                                                                                                                                                                                                                                                                                                                                                                                                                                                    |   |                |                    |    |                |                     |   |                |                       |   |                |                         |   |                |                       |   |                |                         |   |                |                   |    |                 |                  |    |                 |                           |    |         |              |    |         |                           |
| 331 | me4<br>Show the field ONLY if: [ma6]>0                                                      | 4. Were you ever told at any time that in order to change your methadone/buprenorphine dose that you would have to pay someone money? U, K:me4ru me4ruf1             | radio<br><table border="1"> <tr><td>1</td><td>Yes</td></tr> <tr><td>0</td><td>No</td></tr> </table>                                                                                                                                                                                                                                                                                                                                                                                                                                                                                                                                                                                                                                                                | 1 | Yes            | 0                  | No |                |                     |   |                |                       |   |                |                         |   |                |                       |   |                |                         |   |                |                   |    |                 |                  |    |                 |                           |    |         |              |    |         |                           |
| 1   | Yes                                                                                         |                                                                                                                                                                      |                                                                                                                                                                                                                                                                                                                                                                                                                                                                                                                                                                                                                                                                                                                                                                    |   |                |                    |    |                |                     |   |                |                       |   |                |                         |   |                |                       |   |                |                         |   |                |                   |    |                 |                  |    |                 |                           |    |         |              |    |         |                           |
| 0   | No                                                                                          |                                                                                                                                                                      |                                                                                                                                                                                                                                                                                                                                                                                                                                                                                                                                                                                                                                                                                                                                                                    |   |                |                    |    |                |                     |   |                |                       |   |                |                         |   |                |                       |   |                |                         |   |                |                   |    |                 |                  |    |                 |                           |    |         |              |    |         |                           |
| 332 | me4a<br>Show the field ONLY if: [ma6]>0                                                     | ME4a. Have you been on OST today or in the last 10 days? U, K:me4aru me4aruf1                                                                                        | radio<br><table border="1"> <tr><td>1</td><td>Yes</td></tr> <tr><td>0</td><td>No</td></tr> </table>                                                                                                                                                                                                                                                                                                                                                                                                                                                                                                                                                                                                                                                                | 1 | Yes            | 0                  | No |                |                     |   |                |                       |   |                |                         |   |                |                       |   |                |                         |   |                |                   |    |                 |                  |    |                 |                           |    |         |              |    |         |                           |
| 1   | Yes                                                                                         |                                                                                                                                                                      |                                                                                                                                                                                                                                                                                                                                                                                                                                                                                                                                                                                                                                                                                                                                                                    |   |                |                    |    |                |                     |   |                |                       |   |                |                         |   |                |                       |   |                |                         |   |                |                   |    |                 |                  |    |                 |                           |    |         |              |    |         |                           |
| 0   | No                                                                                          |                                                                                                                                                                      |                                                                                                                                                                                                                                                                                                                                                                                                                                                                                                                                                                                                                                                                                                                                                                    |   |                |                    |    |                |                     |   |                |                       |   |                |                         |   |                |                       |   |                |                         |   |                |                   |    |                 |                  |    |                 |                           |    |         |              |    |         |                           |
| 333 | me5<br>Show the field ONLY if: [ma6]>0 and [screen_arm_1] [country] = '3' and [event] = '1' | 5. On your way to or from the methadone program, were you EVER stopped by police and questioned? U:me5ru, K: N/A                                                     | radio<br><table border="1"> <tr><td>1</td><td>Yes</td></tr> <tr><td>0</td><td>No</td></tr> </table>                                                                                                                                                                                                                                                                                                                                                                                                                                                                                                                                                                                                                                                                | 1 | Yes            | 0                  | No |                |                     |   |                |                       |   |                |                         |   |                |                       |   |                |                         |   |                |                   |    |                 |                  |    |                 |                           |    |         |              |    |         |                           |
| 1   | Yes                                                                                         |                                                                                                                                                                      |                                                                                                                                                                                                                                                                                                                                                                                                                                                                                                                                                                                                                                                                                                                                                                    |   |                |                    |    |                |                     |   |                |                       |   |                |                         |   |                |                       |   |                |                         |   |                |                   |    |                 |                  |    |                 |                           |    |         |              |    |         |                           |
| 0   | No                                                                                          |                                                                                                                                                                      |                                                                                                                                                                                                                                                                                                                                                                                                                                                                                                                                                                                                                                                                                                                                                                    |   |                |                    |    |                |                     |   |                |                       |   |                |                         |   |                |                       |   |                |                         |   |                |                   |    |                 |                  |    |                 |                           |    |         |              |    |         |                           |

|     |                                                                                                                         |                                                                                                                                                                                                                           |                                                              |
|-----|-------------------------------------------------------------------------------------------------------------------------|---------------------------------------------------------------------------------------------------------------------------------------------------------------------------------------------------------------------------|--------------------------------------------------------------|
| 334 | me6<br>Show the field ONLY if:<br>[me5] = '1'                                                                           | 6. When you were stopped by the police on your way to or from the methadone program, were you ever asked to pay them money in order not to be arrested? U:me6ru, K: N/A                                                   | radio, Required<br>1 Yes<br>0 No                             |
| 335 | me7<br>Show the field ONLY if:<br>[me5]='1'                                                                             | 7. When you were stopped by the police on your way to or from the methadone program, were you ever asked to cooperate with them (e.g. sell somebody out, have sex with them) in order not to be arrested? U:me7ru, K: N/A | radio, Required<br>1 Yes<br>0 No                             |
| 336 | me8<br>Show the field ONLY if:<br>[me5]='1'                                                                             | 8. When you were stopped by the police on your way to or from the methadone program, were you ever arrested and detained? U:me8ru, K: N/A                                                                                 | radio, Required<br>1 Yes<br>0 No                             |
| 337 | me9<br>Show the field ONLY if:<br>[me8]='1'                                                                             | 9. If YES ( you were arrested and detained) did you experience abstinence syndrome (withdrawal)? U:me9ru, K: N/A                                                                                                          | radio, Required<br>1 Yes<br>0 No                             |
| 338 | me10<br>Show the field ONLY if:<br>[ma6] > 0 and [event] = '1'                                                          | 10. Were you in a methadone treatment program in the last year? U:me10ru, K: N/A                                                                                                                                          | radio, Required<br>1 Yes<br>0 No<br><br>Custom alignment: LV |
| 339 | me11m<br>Show the field ONLY if:<br>[me4a] = '1' or [ma6] > 0                                                           | 11m. When did you enter the OST Program? (Month) U:me11mruc me11mrucf1, K: me11mru                                                                                                                                        | text (number, Min: 1, Max: 12)                               |
| 340 | me11y<br>Show the field ONLY if:<br>[me4a] = '1' or [ma6] > 0                                                           | 11y. When did you enter the OST Program? (Year) U:me11yruc me11yrucf1<br>YYYY                                                                                                                                             | text (number, Min: 1980, Max: 2019)                          |
| 341 | me12y<br>Show the field ONLY if:<br>[screen_arm_1][country] = '3'<br>and [event] = '1' and ([me4a] = '1' or [ma6] > 0)  | 12y. What was the total length of time on the most recent methadone treatment program including short breaks? U;me12yruc K: N/A<br>Years                                                                                  | text (number, Min: 0, Max: 20)                               |
| 342 | me12m<br>Show the field ONLY if:<br>[screen_arm_1][country] = '3'<br>and [event] = '1' and ([me4a] = '1' or [ma6] > 0)  | 12m. What was the total length of time on the most recent methadone treatment program including short breaks? U:me12mruc<br>Months                                                                                        | text (number, Min: 0, Max: 11)                               |
| 343 | me12md<br>Show the field ONLY if:<br>[screen_arm_1][country] = '3'<br>and [event] = '1' and ([me4a] = '1' or [ma6] > 0) | 12d. What was the total length of time on the most recent methadone treatment program including short breaks? (Days) U: me12mdruc, K: N/A<br>Days                                                                         | text (number, Min: 0, Max: 30)                               |
| 344 | me13<br>Show the field ONLY if:<br>[screen_arm_1][country] = '3'<br>and [event] = '1' and ([me4a] = '1' or [ma6] > 0)   | 13. Where were you last on OST? U: me13ruc, K: N/A                                                                                                                                                                        | radio<br>1 In prison<br>2 In SIZO<br>3 In the community      |
| 345 | me14<br>Show the field ONLY if:<br>[me4a] = '1' or [ma6] > 0                                                            | 14. Are you satisfied with the length of your OST? U:me14ruc me14rucf1, K: me14ru                                                                                                                                         | radio<br>1 Yes<br>0 No                                       |
| 346 | me15<br>Show the field ONLY if:<br>[me14] = '0'                                                                         | 15. If No, do you wish you had been treated for a shorter or longer period? U:me15ruc me15rucf1, K: me15ru                                                                                                                | radio<br>1 Shorter<br>2 Longer                               |
| 347 | me16<br>Show the field ONLY if:<br>[ma6] > 0                                                                            | 16. What was your dosage the day before the discharge U:me16ruc, K: What is your current dosage? U:Me16ru me16rucf1<br>mg                                                                                                 | text (number, Min: 0)                                        |

|     |                                                       |                                                                                                                                                                                            |                                                                                                                                                                                                                                                                                                                                            |   |                  |                                       |                    |         |                         |   |                 |               |                  |         |                                     |
|-----|-------------------------------------------------------|--------------------------------------------------------------------------------------------------------------------------------------------------------------------------------------------|--------------------------------------------------------------------------------------------------------------------------------------------------------------------------------------------------------------------------------------------------------------------------------------------------------------------------------------------|---|------------------|---------------------------------------|--------------------|---------|-------------------------|---|-----------------|---------------|------------------|---------|-------------------------------------|
| 348 | me16a<br>Show the field ONLY if:<br>[ma6] > 0         | 16a. I think my dose of methadone/buprenorphine should be.. U: N/A in baseline me16arucf1, K: me16aru                                                                                      | radio<br><table border="1"> <tr><td>1</td><td>Higher</td></tr> <tr><td>2</td><td>Lower</td></tr> <tr><td>3</td><td>Stay the same</td></tr> </table>                                                                                                                                                                                        | 1 | Higher           | 2                                     | Lower              | 3       | Stay the same           |   |                 |               |                  |         |                                     |
| 1   | Higher                                                |                                                                                                                                                                                            |                                                                                                                                                                                                                                                                                                                                            |   |                  |                                       |                    |         |                         |   |                 |               |                  |         |                                     |
| 2   | Lower                                                 |                                                                                                                                                                                            |                                                                                                                                                                                                                                                                                                                                            |   |                  |                                       |                    |         |                         |   |                 |               |                  |         |                                     |
| 3   | Stay the same                                         |                                                                                                                                                                                            |                                                                                                                                                                                                                                                                                                                                            |   |                  |                                       |                    |         |                         |   |                 |               |                  |         |                                     |
| 349 | me17<br>Show the field ONLY if:<br>[ma6] > 0          | 17. On the scale from 1 to 5 how hard was it for you to INCREASE your prescribed dose of methadone/buprenorphine (1 - extremely easy, 5 - extremely hard)? U: me17ruc me17rucf1, K: me17ru | radio<br><table border="1"> <tr><td>1</td><td>1 Extremely easy</td></tr> <tr><td>2</td><td>2 Somewhat easy</td></tr> <tr><td>3</td><td>3 Neither hard nor easy</td></tr> <tr><td>4</td><td>4 Somewhat hard</td></tr> <tr><td>5</td><td>5 Extremely hard</td></tr> <tr><td>6</td><td>I never asked to INCREASE methadone</td></tr> </table> | 1 | 1 Extremely easy | 2                                     | 2 Somewhat easy    | 3       | 3 Neither hard nor easy | 4 | 4 Somewhat hard | 5             | 5 Extremely hard | 6       | I never asked to INCREASE methadone |
| 1   | 1 Extremely easy                                      |                                                                                                                                                                                            |                                                                                                                                                                                                                                                                                                                                            |   |                  |                                       |                    |         |                         |   |                 |               |                  |         |                                     |
| 2   | 2 Somewhat easy                                       |                                                                                                                                                                                            |                                                                                                                                                                                                                                                                                                                                            |   |                  |                                       |                    |         |                         |   |                 |               |                  |         |                                     |
| 3   | 3 Neither hard nor easy                               |                                                                                                                                                                                            |                                                                                                                                                                                                                                                                                                                                            |   |                  |                                       |                    |         |                         |   |                 |               |                  |         |                                     |
| 4   | 4 Somewhat hard                                       |                                                                                                                                                                                            |                                                                                                                                                                                                                                                                                                                                            |   |                  |                                       |                    |         |                         |   |                 |               |                  |         |                                     |
| 5   | 5 Extremely hard                                      |                                                                                                                                                                                            |                                                                                                                                                                                                                                                                                                                                            |   |                  |                                       |                    |         |                         |   |                 |               |                  |         |                                     |
| 6   | I never asked to INCREASE methadone                   |                                                                                                                                                                                            |                                                                                                                                                                                                                                                                                                                                            |   |                  |                                       |                    |         |                         |   |                 |               |                  |         |                                     |
| 350 | me18<br>Show the field ONLY if:<br>[ma6] > 0          | 18. On the scale from 1 to 5 how hard was it for you to DECREASE your prescribed dose of methadone/buprenorphine (1 - extremely easy, 5 - extremely hard)? U: me18ruc me18rucf1, K: me18ru | radio<br><table border="1"> <tr><td>1</td><td>1 Extremely easy</td></tr> <tr><td>2</td><td>2 Somewhat easy</td></tr> <tr><td>3</td><td>3 Neither hard nor easy</td></tr> <tr><td>4</td><td>4 Somewhat hard</td></tr> <tr><td>5</td><td>5 Extremely hard</td></tr> <tr><td>6</td><td>I never asked to DECREASE methadone</td></tr> </table> | 1 | 1 Extremely easy | 2                                     | 2 Somewhat easy    | 3       | 3 Neither hard nor easy | 4 | 4 Somewhat hard | 5             | 5 Extremely hard | 6       | I never asked to DECREASE methadone |
| 1   | 1 Extremely easy                                      |                                                                                                                                                                                            |                                                                                                                                                                                                                                                                                                                                            |   |                  |                                       |                    |         |                         |   |                 |               |                  |         |                                     |
| 2   | 2 Somewhat easy                                       |                                                                                                                                                                                            |                                                                                                                                                                                                                                                                                                                                            |   |                  |                                       |                    |         |                         |   |                 |               |                  |         |                                     |
| 3   | 3 Neither hard nor easy                               |                                                                                                                                                                                            |                                                                                                                                                                                                                                                                                                                                            |   |                  |                                       |                    |         |                         |   |                 |               |                  |         |                                     |
| 4   | 4 Somewhat hard                                       |                                                                                                                                                                                            |                                                                                                                                                                                                                                                                                                                                            |   |                  |                                       |                    |         |                         |   |                 |               |                  |         |                                     |
| 5   | 5 Extremely hard                                      |                                                                                                                                                                                            |                                                                                                                                                                                                                                                                                                                                            |   |                  |                                       |                    |         |                         |   |                 |               |                  |         |                                     |
| 6   | I never asked to DECREASE methadone                   |                                                                                                                                                                                            |                                                                                                                                                                                                                                                                                                                                            |   |                  |                                       |                    |         |                         |   |                 |               |                  |         |                                     |
| 351 | me19<br>Show the field ONLY if:<br>[ma6] > 0          | 19. Did you experience any side effects from your prescribed dose of methadone that somehow impacted your interest in continuing? U: me19ruc me19rucf1, K: me19ru                          | radio<br><table border="1"> <tr><td>1</td><td>Yes</td></tr> <tr><td>0</td><td>No</td></tr> </table>                                                                                                                                                                                                                                        | 1 | Yes              | 0                                     | No                 |         |                         |   |                 |               |                  |         |                                     |
| 1   | Yes                                                   |                                                                                                                                                                                            |                                                                                                                                                                                                                                                                                                                                            |   |                  |                                       |                    |         |                         |   |                 |               |                  |         |                                     |
| 0   | No                                                    |                                                                                                                                                                                            |                                                                                                                                                                                                                                                                                                                                            |   |                  |                                       |                    |         |                         |   |                 |               |                  |         |                                     |
| 352 | me20<br>Show the field ONLY if:<br>[ma6] > 0          | 20. Did you ever keep a part of your prescribed dose of methadone for yourself to take later? U, K: me20ruc me20rucf1                                                                      | radio<br><table border="1"> <tr><td>1</td><td>Yes</td></tr> <tr><td>0</td><td>No</td></tr> </table>                                                                                                                                                                                                                                        | 1 | Yes              | 0                                     | No                 |         |                         |   |                 |               |                  |         |                                     |
| 1   | Yes                                                   |                                                                                                                                                                                            |                                                                                                                                                                                                                                                                                                                                            |   |                  |                                       |                    |         |                         |   |                 |               |                  |         |                                     |
| 0   | No                                                    |                                                                                                                                                                                            |                                                                                                                                                                                                                                                                                                                                            |   |                  |                                       |                    |         |                         |   |                 |               |                  |         |                                     |
| 353 | me21<br>Show the field ONLY if:<br>[me20]='1'         | 21. If Yes, for what reasons? [check all that apply] U: me21ruc me21rucf1, K: N/A                                                                                                          | checkbox<br><table border="1"> <tr><td>1</td><td>me21__1</td><td>To save for myself for later that day</td></tr> <tr><td>2</td><td>me21__2</td><td>For travelling purposes</td></tr> <tr><td>3</td><td>me21__3</td><td>For a weekend</td></tr> <tr><td>4</td><td>me21__4</td><td>Other (please specify)_____</td></tr> </table>            | 1 | me21__1          | To save for myself for later that day | 2                  | me21__2 | For travelling purposes | 3 | me21__3         | For a weekend | 4                | me21__4 | Other (please specify)_____         |
| 1   | me21__1                                               | To save for myself for later that day                                                                                                                                                      |                                                                                                                                                                                                                                                                                                                                            |   |                  |                                       |                    |         |                         |   |                 |               |                  |         |                                     |
| 2   | me21__2                                               | For travelling purposes                                                                                                                                                                    |                                                                                                                                                                                                                                                                                                                                            |   |                  |                                       |                    |         |                         |   |                 |               |                  |         |                                     |
| 3   | me21__3                                               | For a weekend                                                                                                                                                                              |                                                                                                                                                                                                                                                                                                                                            |   |                  |                                       |                    |         |                         |   |                 |               |                  |         |                                     |
| 4   | me21__4                                               | Other (please specify)_____                                                                                                                                                                |                                                                                                                                                                                                                                                                                                                                            |   |                  |                                       |                    |         |                         |   |                 |               |                  |         |                                     |
| 354 | me21oth<br>Show the field ONLY if:<br>[me21(4)] = '1' | Other(please specify) U: me21othruc me21othrucf1, K: N/A                                                                                                                                   | text                                                                                                                                                                                                                                                                                                                                       |   |                  |                                       |                    |         |                         |   |                 |               |                  |         |                                     |
| 355 | me22<br>Show the field ONLY if:<br>[ma6] > 0          | 22. Did you ever have short (e.g., less than 10 days) interruptions in your methadone treatment? U: me22ruc me22rucf1, K: me22ru                                                           | radio<br><table border="1"> <tr><td>1</td><td>Yes</td></tr> <tr><td>0</td><td>No</td></tr> </table>                                                                                                                                                                                                                                        | 1 | Yes              | 0                                     | No                 |         |                         |   |                 |               |                  |         |                                     |
| 1   | Yes                                                   |                                                                                                                                                                                            |                                                                                                                                                                                                                                                                                                                                            |   |                  |                                       |                    |         |                         |   |                 |               |                  |         |                                     |
| 0   | No                                                    |                                                                                                                                                                                            |                                                                                                                                                                                                                                                                                                                                            |   |                  |                                       |                    |         |                         |   |                 |               |                  |         |                                     |
| 356 | me23<br>Show the field ONLY if:<br>[me22] = '1'       | 23. For what reasons did you have interruptions in treatment? U: me23ruc me23rucf1, K: me23ru                                                                                              | notes<br>Custom alignment: RH                                                                                                                                                                                                                                                                                                              |   |                  |                                       |                    |         |                         |   |                 |               |                  |         |                                     |
| 357 | me24<br>Show the field ONLY if:<br>[ma6] > 0          | 24. Did you tell anyone that you were on methadone program? U: me24ruc me24rucf1, K: me24ru                                                                                                | radio<br><table border="1"> <tr><td>1</td><td>Yes</td></tr> <tr><td>0</td><td>No</td></tr> </table>                                                                                                                                                                                                                                        | 1 | Yes              | 0                                     | No                 |         |                         |   |                 |               |                  |         |                                     |
| 1   | Yes                                                   |                                                                                                                                                                                            |                                                                                                                                                                                                                                                                                                                                            |   |                  |                                       |                    |         |                         |   |                 |               |                  |         |                                     |
| 0   | No                                                    |                                                                                                                                                                                            |                                                                                                                                                                                                                                                                                                                                            |   |                  |                                       |                    |         |                         |   |                 |               |                  |         |                                     |
| 358 | me24a<br>Show the field ONLY if:<br>[me4a]='1'        | How often do you take illegal drugs in addition to or instead of your methadone/buprenorphine medication? U: N/A in baseline me24arucf1 K: me24aru                                         | radio<br><table border="1"> <tr><td>1</td><td>Daily</td></tr> <tr><td>2</td><td>3-4 times per week</td></tr> <tr><td>3</td><td>Once per week</td></tr> <tr><td>4</td><td>1-2 per month</td></tr> <tr><td>5</td><td>Never</td></tr> </table>                                                                                                | 1 | Daily            | 2                                     | 3-4 times per week | 3       | Once per week           | 4 | 1-2 per month   | 5             | Never            |         |                                     |
| 1   | Daily                                                 |                                                                                                                                                                                            |                                                                                                                                                                                                                                                                                                                                            |   |                  |                                       |                    |         |                         |   |                 |               |                  |         |                                     |
| 2   | 3-4 times per week                                    |                                                                                                                                                                                            |                                                                                                                                                                                                                                                                                                                                            |   |                  |                                       |                    |         |                         |   |                 |               |                  |         |                                     |
| 3   | Once per week                                         |                                                                                                                                                                                            |                                                                                                                                                                                                                                                                                                                                            |   |                  |                                       |                    |         |                         |   |                 |               |                  |         |                                     |
| 4   | 1-2 per month                                         |                                                                                                                                                                                            |                                                                                                                                                                                                                                                                                                                                            |   |                  |                                       |                    |         |                         |   |                 |               |                  |         |                                     |
| 5   | Never                                                 |                                                                                                                                                                                            |                                                                                                                                                                                                                                                                                                                                            |   |                  |                                       |                    |         |                         |   |                 |               |                  |         |                                     |

|     |                                                                                               |                                                                                                                                                 |                                                                                                                                                                                                                                                                                                                                                                                                                                                                                                                                                                                                                                                                                                                                                   |   |          |                                              |   |          |                                                                 |   |          |                                                        |   |          |                               |   |          |                                               |   |          |                                                                |   |         |                                     |   |         |                                               |
|-----|-----------------------------------------------------------------------------------------------|-------------------------------------------------------------------------------------------------------------------------------------------------|---------------------------------------------------------------------------------------------------------------------------------------------------------------------------------------------------------------------------------------------------------------------------------------------------------------------------------------------------------------------------------------------------------------------------------------------------------------------------------------------------------------------------------------------------------------------------------------------------------------------------------------------------------------------------------------------------------------------------------------------------|---|----------|----------------------------------------------|---|----------|-----------------------------------------------------------------|---|----------|--------------------------------------------------------|---|----------|-------------------------------|---|----------|-----------------------------------------------|---|----------|----------------------------------------------------------------|---|---------|-------------------------------------|---|---------|-----------------------------------------------|
| 359 | <p>me25</p> <p>Show the field ONLY if:<br/>[ma6] &gt; 0 and [event] = '1'</p>                 | <p>25. What was the primary reason for your leaving the program? [check all that apply]: U: me25ruc , K: N/A</p>                                | <p>checkbox</p> <table border="1"> <tr><td>1</td><td>me25__1</td><td>Personal decision to complete MMT</td></tr> <tr><td>2</td><td>me25__2</td><td>Expelled from the program due to misconduct/truancy</td></tr> <tr><td>3</td><td>me25__3</td><td>I thought that recovered</td></tr> <tr><td>4</td><td>me25__4</td><td>Putting in an insulator</td></tr> <tr><td>5</td><td>me25__5</td><td>Moved to live elsewhere where there is no MMT</td></tr> <tr><td>6</td><td>me25__6</td><td>I do not like the rules for program participants (place, time)</td></tr> <tr><td>7</td><td>me25__7</td><td>Workers program badly I was treated</td></tr> <tr><td>8</td><td>me25__8</td><td>I was told that I was not fit for the program</td></tr> </table> | 1 | me25__1  | Personal decision to complete MMT            | 2 | me25__2  | Expelled from the program due to misconduct/truancy             | 3 | me25__3  | I thought that recovered                               | 4 | me25__4  | Putting in an insulator       | 5 | me25__5  | Moved to live elsewhere where there is no MMT | 6 | me25__6  | I do not like the rules for program participants (place, time) | 7 | me25__7 | Workers program badly I was treated | 8 | me25__8 | I was told that I was not fit for the program |
| 1   | me25__1                                                                                       | Personal decision to complete MMT                                                                                                               |                                                                                                                                                                                                                                                                                                                                                                                                                                                                                                                                                                                                                                                                                                                                                   |   |          |                                              |   |          |                                                                 |   |          |                                                        |   |          |                               |   |          |                                               |   |          |                                                                |   |         |                                     |   |         |                                               |
| 2   | me25__2                                                                                       | Expelled from the program due to misconduct/truancy                                                                                             |                                                                                                                                                                                                                                                                                                                                                                                                                                                                                                                                                                                                                                                                                                                                                   |   |          |                                              |   |          |                                                                 |   |          |                                                        |   |          |                               |   |          |                                               |   |          |                                                                |   |         |                                     |   |         |                                               |
| 3   | me25__3                                                                                       | I thought that recovered                                                                                                                        |                                                                                                                                                                                                                                                                                                                                                                                                                                                                                                                                                                                                                                                                                                                                                   |   |          |                                              |   |          |                                                                 |   |          |                                                        |   |          |                               |   |          |                                               |   |          |                                                                |   |         |                                     |   |         |                                               |
| 4   | me25__4                                                                                       | Putting in an insulator                                                                                                                         |                                                                                                                                                                                                                                                                                                                                                                                                                                                                                                                                                                                                                                                                                                                                                   |   |          |                                              |   |          |                                                                 |   |          |                                                        |   |          |                               |   |          |                                               |   |          |                                                                |   |         |                                     |   |         |                                               |
| 5   | me25__5                                                                                       | Moved to live elsewhere where there is no MMT                                                                                                   |                                                                                                                                                                                                                                                                                                                                                                                                                                                                                                                                                                                                                                                                                                                                                   |   |          |                                              |   |          |                                                                 |   |          |                                                        |   |          |                               |   |          |                                               |   |          |                                                                |   |         |                                     |   |         |                                               |
| 6   | me25__6                                                                                       | I do not like the rules for program participants (place, time)                                                                                  |                                                                                                                                                                                                                                                                                                                                                                                                                                                                                                                                                                                                                                                                                                                                                   |   |          |                                              |   |          |                                                                 |   |          |                                                        |   |          |                               |   |          |                                               |   |          |                                                                |   |         |                                     |   |         |                                               |
| 7   | me25__7                                                                                       | Workers program badly I was treated                                                                                                             |                                                                                                                                                                                                                                                                                                                                                                                                                                                                                                                                                                                                                                                                                                                                                   |   |          |                                              |   |          |                                                                 |   |          |                                                        |   |          |                               |   |          |                                               |   |          |                                                                |   |         |                                     |   |         |                                               |
| 8   | me25__8                                                                                       | I was told that I was not fit for the program                                                                                                   |                                                                                                                                                                                                                                                                                                                                                                                                                                                                                                                                                                                                                                                                                                                                                   |   |          |                                              |   |          |                                                                 |   |          |                                                        |   |          |                               |   |          |                                               |   |          |                                                                |   |         |                                     |   |         |                                               |
| 360 | <p>me26</p> <p>Show the field ONLY if:<br/>[ma6] &gt; 0</p>                                   | <p>26. Do you use any of these substances concurrently with/instead of methadone/buprenorphine? If yes, which ones? U, K: me26ruc me26rucf1</p> | <p>checkbox</p> <table border="1"> <tr><td>1</td><td>me26__1</td><td>Klonasepam</td></tr> <tr><td>2</td><td>me26__2</td><td>Diasepam</td></tr> <tr><td>3</td><td>me26__3</td><td>Fenasepam</td></tr> <tr><td>4</td><td>me26__4</td><td>Somnol</td></tr> <tr><td>5</td><td>me26__5</td><td>Dimedrol</td></tr> <tr><td>6</td><td>me26__6</td><td>ALCOHOL</td></tr> <tr><td>7</td><td>me26__7</td><td>None of those</td></tr> <tr><td>8</td><td>me26__8</td><td>OTHER:</td></tr> </table>                                                                                                                                                                                                                                                            | 1 | me26__1  | Klonasepam                                   | 2 | me26__2  | Diasepam                                                        | 3 | me26__3  | Fenasepam                                              | 4 | me26__4  | Somnol                        | 5 | me26__5  | Dimedrol                                      | 6 | me26__6  | ALCOHOL                                                        | 7 | me26__7 | None of those                       | 8 | me26__8 | OTHER:                                        |
| 1   | me26__1                                                                                       | Klonasepam                                                                                                                                      |                                                                                                                                                                                                                                                                                                                                                                                                                                                                                                                                                                                                                                                                                                                                                   |   |          |                                              |   |          |                                                                 |   |          |                                                        |   |          |                               |   |          |                                               |   |          |                                                                |   |         |                                     |   |         |                                               |
| 2   | me26__2                                                                                       | Diasepam                                                                                                                                        |                                                                                                                                                                                                                                                                                                                                                                                                                                                                                                                                                                                                                                                                                                                                                   |   |          |                                              |   |          |                                                                 |   |          |                                                        |   |          |                               |   |          |                                               |   |          |                                                                |   |         |                                     |   |         |                                               |
| 3   | me26__3                                                                                       | Fenasepam                                                                                                                                       |                                                                                                                                                                                                                                                                                                                                                                                                                                                                                                                                                                                                                                                                                                                                                   |   |          |                                              |   |          |                                                                 |   |          |                                                        |   |          |                               |   |          |                                               |   |          |                                                                |   |         |                                     |   |         |                                               |
| 4   | me26__4                                                                                       | Somnol                                                                                                                                          |                                                                                                                                                                                                                                                                                                                                                                                                                                                                                                                                                                                                                                                                                                                                                   |   |          |                                              |   |          |                                                                 |   |          |                                                        |   |          |                               |   |          |                                               |   |          |                                                                |   |         |                                     |   |         |                                               |
| 5   | me26__5                                                                                       | Dimedrol                                                                                                                                        |                                                                                                                                                                                                                                                                                                                                                                                                                                                                                                                                                                                                                                                                                                                                                   |   |          |                                              |   |          |                                                                 |   |          |                                                        |   |          |                               |   |          |                                               |   |          |                                                                |   |         |                                     |   |         |                                               |
| 6   | me26__6                                                                                       | ALCOHOL                                                                                                                                         |                                                                                                                                                                                                                                                                                                                                                                                                                                                                                                                                                                                                                                                                                                                                                   |   |          |                                              |   |          |                                                                 |   |          |                                                        |   |          |                               |   |          |                                               |   |          |                                                                |   |         |                                     |   |         |                                               |
| 7   | me26__7                                                                                       | None of those                                                                                                                                   |                                                                                                                                                                                                                                                                                                                                                                                                                                                                                                                                                                                                                                                                                                                                                   |   |          |                                              |   |          |                                                                 |   |          |                                                        |   |          |                               |   |          |                                               |   |          |                                                                |   |         |                                     |   |         |                                               |
| 8   | me26__8                                                                                       | OTHER:                                                                                                                                          |                                                                                                                                                                                                                                                                                                                                                                                                                                                                                                                                                                                                                                                                                                                                                   |   |          |                                              |   |          |                                                                 |   |          |                                                        |   |          |                               |   |          |                                               |   |          |                                                                |   |         |                                     |   |         |                                               |
| 361 | <p>me26oth</p> <p>Show the field ONLY if:<br/>[me26(8)] = '1'</p>                             | <p>Other: U: me26othruc, K: me26othrua me26othrucf1</p>                                                                                         | <p>text</p>                                                                                                                                                                                                                                                                                                                                                                                                                                                                                                                                                                                                                                                                                                                                       |   |          |                                              |   |          |                                                                 |   |          |                                                        |   |          |                               |   |          |                                               |   |          |                                                                |   |         |                                     |   |         |                                               |
| 362 | <p>me27</p> <p>Show the field ONLY if:<br/>[ma6] &gt; 0</p>                                   | <p>27. Why did you use these concurrently with methadone/buprenorphine? U: me27ruc me27rucf1, K: me27ru</p>                                     | <p>checkbox</p> <table border="1"> <tr><td>1</td><td>me27__1</td><td>I need it when I miss visiting the site</td></tr> <tr><td>2</td><td>me27__2</td><td>I need to do it when I go away to a place where there is no OST</td></tr> <tr><td>3</td><td>me27__3</td><td>Methadone/buprenorphine does not take away my cravings</td></tr> <tr><td>4</td><td>me27__4</td><td>Sometimes I want to feel high</td></tr> <tr><td>5</td><td>me27__5</td><td>Other, specify _____</td></tr> </table>                                                                                                                                                                                                                                                         | 1 | me27__1  | I need it when I miss visiting the site      | 2 | me27__2  | I need to do it when I go away to a place where there is no OST | 3 | me27__3  | Methadone/buprenorphine does not take away my cravings | 4 | me27__4  | Sometimes I want to feel high | 5 | me27__5  | Other, specify _____                          |   |          |                                                                |   |         |                                     |   |         |                                               |
| 1   | me27__1                                                                                       | I need it when I miss visiting the site                                                                                                         |                                                                                                                                                                                                                                                                                                                                                                                                                                                                                                                                                                                                                                                                                                                                                   |   |          |                                              |   |          |                                                                 |   |          |                                                        |   |          |                               |   |          |                                               |   |          |                                                                |   |         |                                     |   |         |                                               |
| 2   | me27__2                                                                                       | I need to do it when I go away to a place where there is no OST                                                                                 |                                                                                                                                                                                                                                                                                                                                                                                                                                                                                                                                                                                                                                                                                                                                                   |   |          |                                              |   |          |                                                                 |   |          |                                                        |   |          |                               |   |          |                                               |   |          |                                                                |   |         |                                     |   |         |                                               |
| 3   | me27__3                                                                                       | Methadone/buprenorphine does not take away my cravings                                                                                          |                                                                                                                                                                                                                                                                                                                                                                                                                                                                                                                                                                                                                                                                                                                                                   |   |          |                                              |   |          |                                                                 |   |          |                                                        |   |          |                               |   |          |                                               |   |          |                                                                |   |         |                                     |   |         |                                               |
| 4   | me27__4                                                                                       | Sometimes I want to feel high                                                                                                                   |                                                                                                                                                                                                                                                                                                                                                                                                                                                                                                                                                                                                                                                                                                                                                   |   |          |                                              |   |          |                                                                 |   |          |                                                        |   |          |                               |   |          |                                               |   |          |                                                                |   |         |                                     |   |         |                                               |
| 5   | me27__5                                                                                       | Other, specify _____                                                                                                                            |                                                                                                                                                                                                                                                                                                                                                                                                                                                                                                                                                                                                                                                                                                                                                   |   |          |                                              |   |          |                                                                 |   |          |                                                        |   |          |                               |   |          |                                               |   |          |                                                                |   |         |                                     |   |         |                                               |
| 363 | <p>me27oth</p> <p>Show the field ONLY if:<br/>[me27(5)] = '1'</p>                             | <p>Other (please specify) U: me27othruc me27othrucf1</p>                                                                                        | <p>text</p>                                                                                                                                                                                                                                                                                                                                                                                                                                                                                                                                                                                                                                                                                                                                       |   |          |                                              |   |          |                                                                 |   |          |                                                        |   |          |                               |   |          |                                               |   |          |                                                                |   |         |                                     |   |         |                                               |
| 364 | <p>me27a</p> <p>Show the field ONLY if:<br/>[ma6] &gt; 0 and [screen_arm_1] [country]='2'</p> | <p>27a. How long do you want to continue taking therapy? U: me27arucf1 K:me27aru</p>                                                            | <p>checkbox</p> <table border="1"> <tr><td>1</td><td>me27a__1</td><td>I don't want to be on the program any longer</td></tr> <tr><td>2</td><td>me27a__2</td><td>Several Days</td></tr> <tr><td>3</td><td>me27a__3</td><td>Several Months</td></tr> <tr><td>4</td><td>me27a__4</td><td>Several Years</td></tr> <tr><td>5</td><td>me27a__5</td><td>Forever</td></tr> <tr><td>6</td><td>me27a__6</td><td>Until I have completed my term on probation</td></tr> </table>                                                                                                                                                                                                                                                                              | 1 | me27a__1 | I don't want to be on the program any longer | 2 | me27a__2 | Several Days                                                    | 3 | me27a__3 | Several Months                                         | 4 | me27a__4 | Several Years                 | 5 | me27a__5 | Forever                                       | 6 | me27a__6 | Until I have completed my term on probation                    |   |         |                                     |   |         |                                               |
| 1   | me27a__1                                                                                      | I don't want to be on the program any longer                                                                                                    |                                                                                                                                                                                                                                                                                                                                                                                                                                                                                                                                                                                                                                                                                                                                                   |   |          |                                              |   |          |                                                                 |   |          |                                                        |   |          |                               |   |          |                                               |   |          |                                                                |   |         |                                     |   |         |                                               |
| 2   | me27a__2                                                                                      | Several Days                                                                                                                                    |                                                                                                                                                                                                                                                                                                                                                                                                                                                                                                                                                                                                                                                                                                                                                   |   |          |                                              |   |          |                                                                 |   |          |                                                        |   |          |                               |   |          |                                               |   |          |                                                                |   |         |                                     |   |         |                                               |
| 3   | me27a__3                                                                                      | Several Months                                                                                                                                  |                                                                                                                                                                                                                                                                                                                                                                                                                                                                                                                                                                                                                                                                                                                                                   |   |          |                                              |   |          |                                                                 |   |          |                                                        |   |          |                               |   |          |                                               |   |          |                                                                |   |         |                                     |   |         |                                               |
| 4   | me27a__4                                                                                      | Several Years                                                                                                                                   |                                                                                                                                                                                                                                                                                                                                                                                                                                                                                                                                                                                                                                                                                                                                                   |   |          |                                              |   |          |                                                                 |   |          |                                                        |   |          |                               |   |          |                                               |   |          |                                                                |   |         |                                     |   |         |                                               |
| 5   | me27a__5                                                                                      | Forever                                                                                                                                         |                                                                                                                                                                                                                                                                                                                                                                                                                                                                                                                                                                                                                                                                                                                                                   |   |          |                                              |   |          |                                                                 |   |          |                                                        |   |          |                               |   |          |                                               |   |          |                                                                |   |         |                                     |   |         |                                               |
| 6   | me27a__6                                                                                      | Until I have completed my term on probation                                                                                                     |                                                                                                                                                                                                                                                                                                                                                                                                                                                                                                                                                                                                                                                                                                                                                   |   |          |                                              |   |          |                                                                 |   |          |                                                        |   |          |                               |   |          |                                               |   |          |                                                                |   |         |                                     |   |         |                                               |
| 365 | me27b                                                                                         | <p>27b. How long does it take to get to the OST site? U: me27brucf1</p>                                                                         | <p>text</p>                                                                                                                                                                                                                                                                                                                                                                                                                                                                                                                                                                                                                                                                                                                                       |   |          |                                              |   |          |                                                                 |   |          |                                                        |   |          |                               |   |          |                                               |   |          |                                                                |   |         |                                     |   |         |                                               |
| 366 | me27c                                                                                         | <p>27c. How do you get there (public transportation, private car?) U: me27rucf1</p>                                                             | <p>text</p>                                                                                                                                                                                                                                                                                                                                                                                                                                                                                                                                                                                                                                                                                                                                       |   |          |                                              |   |          |                                                                 |   |          |                                                        |   |          |                               |   |          |                                               |   |          |                                                                |   |         |                                     |   |         |                                               |

|     |                                               |                                                                                                                                                                                                                                                                                                                                                                        |                                                                                                                            |
|-----|-----------------------------------------------|------------------------------------------------------------------------------------------------------------------------------------------------------------------------------------------------------------------------------------------------------------------------------------------------------------------------------------------------------------------------|----------------------------------------------------------------------------------------------------------------------------|
| 367 | me28<br>Show the field ONLY if: [ma6] > 0     | Section Header: <i>The next few questions will be about how methadone treatment has impacted your everyday life. Please indicate your answer on the scale from 1 to 5, where 1 - very well; 5 - not at all</i><br>28. How did methadone/buprenorphine work for you to reduce your opiate use when you were in a OST treatment program? U: me28ruc me28rucf1, K: me28ru | radio (Matrix)<br>1 Very well<br>2 Moderately well<br>3 Neither helped nor harmed<br>4 Not very well<br>5 Not at all       |
| 368 | me29<br>Show the field ONLY if: [ma6] > 0     | 29. How well did methadone/buprenorphine treatment improve the quality of your life? U: me29ruc me29rucf1, K: me29ru                                                                                                                                                                                                                                                   | radio (Matrix)<br>1 Very well<br>2 Moderately well<br>3 Neither helped nor harmed<br>4 Not very well<br>5 Not at all       |
| 369 | me30<br>Show the field ONLY if: [ma6] > 0     | 30. How well did methadone/buprenorphine treatment improve the quality of your relationships with your family and friends? U: me30ruc me30rucf1, K: me30ru                                                                                                                                                                                                             | radio (Matrix)<br>1 Very well<br>2 Moderately well<br>3 Neither helped nor harmed<br>4 Not very well<br>5 Not at all       |
| 370 | me31<br>Show the field ONLY if: [ma6] > 0     | 31. If you knew someone with an opioid abuse problem, would you refer him or her to methadone treatment? U: me31ruc me31rucf1, K: me31ru                                                                                                                                                                                                                               | radio<br>1 Yes<br>0 No                                                                                                     |
| 371 | me32<br>Show the field ONLY if: [ma6] > 0     | 32. Overall, how satisfied were you with your OST therapy to date? U: me32ruc me32rucf1, K: me32ru                                                                                                                                                                                                                                                                     | radio<br>1 Not satisfied at all<br>2 Not very satisfied<br>3 Neutral<br>4 Somewhat satisfied<br>5 Very satisfied           |
| 372 | me33<br>Show the field ONLY if: [me4a] = '0'  | 33. Will you try to restart methadone treatment sometime? U, K: me33ru                                                                                                                                                                                                                                                                                                 | radio<br>1 Yes<br>0 No                                                                                                     |
| 373 | me33a<br>Show the field ONLY if: [me33] = '0' | 33? We would like to know why you are not interested in restarting methadone treatment. I DO NOT WANT TO RESTART METHADONE TREATMENT BECAUSE: U, K: me33aru                                                                                                                                                                                                            | notes                                                                                                                      |
| 374 | me33b<br>Show the field ONLY if: [me33] = '1' | 33b You said you will try to restart methadone treatment in future, do you anticipate it will be difficult to restart methadone treatment? How difficult will it be to initiate such treatment on a scale from 0 to 10 (0 = not difficult at all; 10 = very difficult)? ,U, K: me33bru                                                                                 | radio<br>0 0-not difficult at all<br>1 1<br>2 2<br>3 3<br>4 4<br>5 5<br>6 6<br>7 7<br>8 8<br>9 9<br>10 10 - very difficult |

|                                                                                    |                                                     |                                                                                                                                                                                                              |                                                                                                                                                                                                                                                                                                                                                                                                                                                                                                                                                                                                                                                                                                                                                |   |                      |   |                      |   |                              |   |                 |   |                        |   |                 |   |                    |   |               |   |                |    |                                  |    |          |    |        |    |                                      |    |                          |
|------------------------------------------------------------------------------------|-----------------------------------------------------|--------------------------------------------------------------------------------------------------------------------------------------------------------------------------------------------------------------|------------------------------------------------------------------------------------------------------------------------------------------------------------------------------------------------------------------------------------------------------------------------------------------------------------------------------------------------------------------------------------------------------------------------------------------------------------------------------------------------------------------------------------------------------------------------------------------------------------------------------------------------------------------------------------------------------------------------------------------------|---|----------------------|---|----------------------|---|------------------------------|---|-----------------|---|------------------------|---|-----------------|---|--------------------|---|---------------|---|----------------|----|----------------------------------|----|----------|----|--------|----|--------------------------------------|----|--------------------------|
| 375                                                                                | ost_complete                                        | Section Header: <i>Form Status</i><br>Complete?                                                                                                                                                              | dropdown<br><table border="1"> <tr><td>0</td><td>Incomplete</td></tr> <tr><td>1</td><td>Unverified</td></tr> <tr><td>2</td><td>Complete</td></tr> </table>                                                                                                                                                                                                                                                                                                                                                                                                                                                                                                                                                                                     | 0 | Incomplete           | 1 | Unverified           | 2 | Complete                     |   |                 |   |                        |   |                 |   |                    |   |               |   |                |    |                                  |    |          |    |        |    |                                      |    |                          |
| 0                                                                                  | Incomplete                                          |                                                                                                                                                                                                              |                                                                                                                                                                                                                                                                                                                                                                                                                                                                                                                                                                                                                                                                                                                                                |   |                      |   |                      |   |                              |   |                 |   |                        |   |                 |   |                    |   |               |   |                |    |                                  |    |          |    |        |    |                                      |    |                          |
| 1                                                                                  | Unverified                                          |                                                                                                                                                                                                              |                                                                                                                                                                                                                                                                                                                                                                                                                                                                                                                                                                                                                                                                                                                                                |   |                      |   |                      |   |                              |   |                 |   |                        |   |                 |   |                    |   |               |   |                |    |                                  |    |          |    |        |    |                                      |    |                          |
| 2                                                                                  | Complete                                            |                                                                                                                                                                                                              |                                                                                                                                                                                                                                                                                                                                                                                                                                                                                                                                                                                                                                                                                                                                                |   |                      |   |                      |   |                              |   |                 |   |                        |   |                 |   |                    |   |               |   |                |    |                                  |    |          |    |        |    |                                      |    |                          |
| Instrument: <b>Health Related Quality Of Life</b> (health_related_quality_of_life) |                                                     |                                                                                                                                                                                                              | <a href="#">^ Collapse</a>                                                                                                                                                                                                                                                                                                                                                                                                                                                                                                                                                                                                                                                                                                                     |   |                      |   |                      |   |                              |   |                 |   |                        |   |                 |   |                    |   |               |   |                |    |                                  |    |          |    |        |    |                                      |    |                          |
| 376                                                                                | qol1                                                | 1. Would you say that in general your health is?                                                                                                                                                             | radio<br><table border="1"> <tr><td>1</td><td>Excellent</td></tr> <tr><td>2</td><td>Very good</td></tr> <tr><td>3</td><td>Good</td></tr> <tr><td>4</td><td>Fair</td></tr> <tr><td>5</td><td>Poor</td></tr> </table>                                                                                                                                                                                                                                                                                                                                                                                                                                                                                                                            | 1 | Excellent            | 2 | Very good            | 3 | Good                         | 4 | Fair            | 5 | Poor                   |   |                 |   |                    |   |               |   |                |    |                                  |    |          |    |        |    |                                      |    |                          |
| 1                                                                                  | Excellent                                           |                                                                                                                                                                                                              |                                                                                                                                                                                                                                                                                                                                                                                                                                                                                                                                                                                                                                                                                                                                                |   |                      |   |                      |   |                              |   |                 |   |                        |   |                 |   |                    |   |               |   |                |    |                                  |    |          |    |        |    |                                      |    |                          |
| 2                                                                                  | Very good                                           |                                                                                                                                                                                                              |                                                                                                                                                                                                                                                                                                                                                                                                                                                                                                                                                                                                                                                                                                                                                |   |                      |   |                      |   |                              |   |                 |   |                        |   |                 |   |                    |   |               |   |                |    |                                  |    |          |    |        |    |                                      |    |                          |
| 3                                                                                  | Good                                                |                                                                                                                                                                                                              |                                                                                                                                                                                                                                                                                                                                                                                                                                                                                                                                                                                                                                                                                                                                                |   |                      |   |                      |   |                              |   |                 |   |                        |   |                 |   |                    |   |               |   |                |    |                                  |    |          |    |        |    |                                      |    |                          |
| 4                                                                                  | Fair                                                |                                                                                                                                                                                                              |                                                                                                                                                                                                                                                                                                                                                                                                                                                                                                                                                                                                                                                                                                                                                |   |                      |   |                      |   |                              |   |                 |   |                        |   |                 |   |                    |   |               |   |                |    |                                  |    |          |    |        |    |                                      |    |                          |
| 5                                                                                  | Poor                                                |                                                                                                                                                                                                              |                                                                                                                                                                                                                                                                                                                                                                                                                                                                                                                                                                                                                                                                                                                                                |   |                      |   |                      |   |                              |   |                 |   |                        |   |                 |   |                    |   |               |   |                |    |                                  |    |          |    |        |    |                                      |    |                          |
| 377                                                                                | qol2                                                | 2. Now thinking about your physical health, which includes physical illness and injury, for how many days during the past 30 days was your physical health not good?<br><i>Number of days</i>                | text (integer, Min: 0, Max: 30)                                                                                                                                                                                                                                                                                                                                                                                                                                                                                                                                                                                                                                                                                                                |   |                      |   |                      |   |                              |   |                 |   |                        |   |                 |   |                    |   |               |   |                |    |                                  |    |          |    |        |    |                                      |    |                          |
| 378                                                                                | qol3                                                | 3. Now thinking about your mental health, which includes stress, depression, and problems with emotions, for how many days during the past 30 days was your mental health not good?<br><i>Number of days</i> | text (integer, Min: 0, Max: 30)                                                                                                                                                                                                                                                                                                                                                                                                                                                                                                                                                                                                                                                                                                                |   |                      |   |                      |   |                              |   |                 |   |                        |   |                 |   |                    |   |               |   |                |    |                                  |    |          |    |        |    |                                      |    |                          |
| 379                                                                                | qol4                                                | 4. During the past 30 days, for about how many days did poor physical or mental health keep you from doing your usual activities, such as self-care, work, or recreation?<br><i>Number of days</i>           | text (integer, Min: 0, Max: 30)                                                                                                                                                                                                                                                                                                                                                                                                                                                                                                                                                                                                                                                                                                                |   |                      |   |                      |   |                              |   |                 |   |                        |   |                 |   |                    |   |               |   |                |    |                                  |    |          |    |        |    |                                      |    |                          |
| 380                                                                                | hqollabel                                           | These next questions are about physical, mental, or emotional problems or limitations you may have in your daily life.                                                                                       | descriptive                                                                                                                                                                                                                                                                                                                                                                                                                                                                                                                                                                                                                                                                                                                                    |   |                      |   |                      |   |                              |   |                 |   |                        |   |                 |   |                    |   |               |   |                |    |                                  |    |          |    |        |    |                                      |    |                          |
| 381                                                                                | qol5                                                | 5. Are you LIMITED in any way in any activities because of any impairment or health problem?                                                                                                                 | radio<br><table border="1"> <tr><td>1</td><td>Yes</td></tr> <tr><td>0</td><td>No</td></tr> <tr><td>8</td><td>Don't know/Unsure</td></tr> </table>                                                                                                                                                                                                                                                                                                                                                                                                                                                                                                                                                                                              | 1 | Yes                  | 0 | No                   | 8 | Don't know/Unsure            |   |                 |   |                        |   |                 |   |                    |   |               |   |                |    |                                  |    |          |    |        |    |                                      |    |                          |
| 1                                                                                  | Yes                                                 |                                                                                                                                                                                                              |                                                                                                                                                                                                                                                                                                                                                                                                                                                                                                                                                                                                                                                                                                                                                |   |                      |   |                      |   |                              |   |                 |   |                        |   |                 |   |                    |   |               |   |                |    |                                  |    |          |    |        |    |                                      |    |                          |
| 0                                                                                  | No                                                  |                                                                                                                                                                                                              |                                                                                                                                                                                                                                                                                                                                                                                                                                                                                                                                                                                                                                                                                                                                                |   |                      |   |                      |   |                              |   |                 |   |                        |   |                 |   |                    |   |               |   |                |    |                                  |    |          |    |        |    |                                      |    |                          |
| 8                                                                                  | Don't know/Unsure                                   |                                                                                                                                                                                                              |                                                                                                                                                                                                                                                                                                                                                                                                                                                                                                                                                                                                                                                                                                                                                |   |                      |   |                      |   |                              |   |                 |   |                        |   |                 |   |                    |   |               |   |                |    |                                  |    |          |    |        |    |                                      |    |                          |
| 382                                                                                | qol6                                                | 6. What is the MAJOR impairment or health problem that limits your activities?                                                                                                                               | radio<br><table border="1"> <tr><td>1</td><td>Arthritis/rheumatism</td></tr> <tr><td>2</td><td>Back or neck problem</td></tr> <tr><td>3</td><td>Fractures, bone/joint injury</td></tr> <tr><td>4</td><td>Walking problem</td></tr> <tr><td>5</td><td>Lung/breathing problem</td></tr> <tr><td>6</td><td>Hearing problem</td></tr> <tr><td>7</td><td>Eye/vision problem</td></tr> <tr><td>8</td><td>Heart problem</td></tr> <tr><td>9</td><td>Stroke problem</td></tr> <tr><td>10</td><td>Hypertension/high blood pressure</td></tr> <tr><td>11</td><td>Diabetes</td></tr> <tr><td>12</td><td>Cancer</td></tr> <tr><td>13</td><td>Depression/anxiety/emotional problem</td></tr> <tr><td>14</td><td>Other impairment/problem</td></tr> </table> | 1 | Arthritis/rheumatism | 2 | Back or neck problem | 3 | Fractures, bone/joint injury | 4 | Walking problem | 5 | Lung/breathing problem | 6 | Hearing problem | 7 | Eye/vision problem | 8 | Heart problem | 9 | Stroke problem | 10 | Hypertension/high blood pressure | 11 | Diabetes | 12 | Cancer | 13 | Depression/anxiety/emotional problem | 14 | Other impairment/problem |
| 1                                                                                  | Arthritis/rheumatism                                |                                                                                                                                                                                                              |                                                                                                                                                                                                                                                                                                                                                                                                                                                                                                                                                                                                                                                                                                                                                |   |                      |   |                      |   |                              |   |                 |   |                        |   |                 |   |                    |   |               |   |                |    |                                  |    |          |    |        |    |                                      |    |                          |
| 2                                                                                  | Back or neck problem                                |                                                                                                                                                                                                              |                                                                                                                                                                                                                                                                                                                                                                                                                                                                                                                                                                                                                                                                                                                                                |   |                      |   |                      |   |                              |   |                 |   |                        |   |                 |   |                    |   |               |   |                |    |                                  |    |          |    |        |    |                                      |    |                          |
| 3                                                                                  | Fractures, bone/joint injury                        |                                                                                                                                                                                                              |                                                                                                                                                                                                                                                                                                                                                                                                                                                                                                                                                                                                                                                                                                                                                |   |                      |   |                      |   |                              |   |                 |   |                        |   |                 |   |                    |   |               |   |                |    |                                  |    |          |    |        |    |                                      |    |                          |
| 4                                                                                  | Walking problem                                     |                                                                                                                                                                                                              |                                                                                                                                                                                                                                                                                                                                                                                                                                                                                                                                                                                                                                                                                                                                                |   |                      |   |                      |   |                              |   |                 |   |                        |   |                 |   |                    |   |               |   |                |    |                                  |    |          |    |        |    |                                      |    |                          |
| 5                                                                                  | Lung/breathing problem                              |                                                                                                                                                                                                              |                                                                                                                                                                                                                                                                                                                                                                                                                                                                                                                                                                                                                                                                                                                                                |   |                      |   |                      |   |                              |   |                 |   |                        |   |                 |   |                    |   |               |   |                |    |                                  |    |          |    |        |    |                                      |    |                          |
| 6                                                                                  | Hearing problem                                     |                                                                                                                                                                                                              |                                                                                                                                                                                                                                                                                                                                                                                                                                                                                                                                                                                                                                                                                                                                                |   |                      |   |                      |   |                              |   |                 |   |                        |   |                 |   |                    |   |               |   |                |    |                                  |    |          |    |        |    |                                      |    |                          |
| 7                                                                                  | Eye/vision problem                                  |                                                                                                                                                                                                              |                                                                                                                                                                                                                                                                                                                                                                                                                                                                                                                                                                                                                                                                                                                                                |   |                      |   |                      |   |                              |   |                 |   |                        |   |                 |   |                    |   |               |   |                |    |                                  |    |          |    |        |    |                                      |    |                          |
| 8                                                                                  | Heart problem                                       |                                                                                                                                                                                                              |                                                                                                                                                                                                                                                                                                                                                                                                                                                                                                                                                                                                                                                                                                                                                |   |                      |   |                      |   |                              |   |                 |   |                        |   |                 |   |                    |   |               |   |                |    |                                  |    |          |    |        |    |                                      |    |                          |
| 9                                                                                  | Stroke problem                                      |                                                                                                                                                                                                              |                                                                                                                                                                                                                                                                                                                                                                                                                                                                                                                                                                                                                                                                                                                                                |   |                      |   |                      |   |                              |   |                 |   |                        |   |                 |   |                    |   |               |   |                |    |                                  |    |          |    |        |    |                                      |    |                          |
| 10                                                                                 | Hypertension/high blood pressure                    |                                                                                                                                                                                                              |                                                                                                                                                                                                                                                                                                                                                                                                                                                                                                                                                                                                                                                                                                                                                |   |                      |   |                      |   |                              |   |                 |   |                        |   |                 |   |                    |   |               |   |                |    |                                  |    |          |    |        |    |                                      |    |                          |
| 11                                                                                 | Diabetes                                            |                                                                                                                                                                                                              |                                                                                                                                                                                                                                                                                                                                                                                                                                                                                                                                                                                                                                                                                                                                                |   |                      |   |                      |   |                              |   |                 |   |                        |   |                 |   |                    |   |               |   |                |    |                                  |    |          |    |        |    |                                      |    |                          |
| 12                                                                                 | Cancer                                              |                                                                                                                                                                                                              |                                                                                                                                                                                                                                                                                                                                                                                                                                                                                                                                                                                                                                                                                                                                                |   |                      |   |                      |   |                              |   |                 |   |                        |   |                 |   |                    |   |               |   |                |    |                                  |    |          |    |        |    |                                      |    |                          |
| 13                                                                                 | Depression/anxiety/emotional problem                |                                                                                                                                                                                                              |                                                                                                                                                                                                                                                                                                                                                                                                                                                                                                                                                                                                                                                                                                                                                |   |                      |   |                      |   |                              |   |                 |   |                        |   |                 |   |                    |   |               |   |                |    |                                  |    |          |    |        |    |                                      |    |                          |
| 14                                                                                 | Other impairment/problem                            |                                                                                                                                                                                                              |                                                                                                                                                                                                                                                                                                                                                                                                                                                                                                                                                                                                                                                                                                                                                |   |                      |   |                      |   |                              |   |                 |   |                        |   |                 |   |                    |   |               |   |                |    |                                  |    |          |    |        |    |                                      |    |                          |
| 383                                                                                | qol6oth<br>Show the field ONLY if:<br>[qol6] = '14' | Other impairment/ problem                                                                                                                                                                                    | text                                                                                                                                                                                                                                                                                                                                                                                                                                                                                                                                                                                                                                                                                                                                           |   |                      |   |                      |   |                              |   |                 |   |                        |   |                 |   |                    |   |               |   |                |    |                                  |    |          |    |        |    |                                      |    |                          |
| 384                                                                                | qol7d                                               | 7. For HOW LONG have your activities been limited because of your major impairment or health problem?<br>Days                                                                                                | text (integer, Min: 0, Max: 30)                                                                                                                                                                                                                                                                                                                                                                                                                                                                                                                                                                                                                                                                                                                |   |                      |   |                      |   |                              |   |                 |   |                        |   |                 |   |                    |   |               |   |                |    |                                  |    |          |    |        |    |                                      |    |                          |
| 385                                                                                | qol7m                                               | 7. Months                                                                                                                                                                                                    | text (integer, Min: 0, Max: 12)                                                                                                                                                                                                                                                                                                                                                                                                                                                                                                                                                                                                                                                                                                                |   |                      |   |                      |   |                              |   |                 |   |                        |   |                 |   |                    |   |               |   |                |    |                                  |    |          |    |        |    |                                      |    |                          |



|     |                                         |                                                                                                                                                                                                                                    |                                                                                                                                                                     |   |            |   |            |   |          |
|-----|-----------------------------------------|------------------------------------------------------------------------------------------------------------------------------------------------------------------------------------------------------------------------------------|---------------------------------------------------------------------------------------------------------------------------------------------------------------------|---|------------|---|------------|---|----------|
| 386 | qol7y                                   | Years                                                                                                                                                                                                                              | text (integer, Min: 0, Max: 70)                                                                                                                                     |   |            |   |            |   |          |
| 387 | qol8                                    | 8. Because of any impairment or health problem, do you need the help of other persons with your PERSONAL CARE needs, such as eating, bathing, dressing, or getting around the house?                                               | yesno<br><table border="1"> <tr> <td>1</td> <td>Yes</td> </tr> <tr> <td>0</td> <td>No</td> </tr> </table>                                                           | 1 | Yes        | 0 | No         |   |          |
| 1   | Yes                                     |                                                                                                                                                                                                                                    |                                                                                                                                                                     |   |            |   |            |   |          |
| 0   | No                                      |                                                                                                                                                                                                                                    |                                                                                                                                                                     |   |            |   |            |   |          |
| 388 | qol9                                    | 9. Because of any impairment or health problem, do you need the help of other persons in handling your ROUTINE needs, such as everyday household chores, doing necessary business, shopping, or getting around for other purposes? | yesno<br><table border="1"> <tr> <td>1</td> <td>Yes</td> </tr> <tr> <td>0</td> <td>No</td> </tr> </table>                                                           | 1 | Yes        | 0 | No         |   |          |
| 1   | Yes                                     |                                                                                                                                                                                                                                    |                                                                                                                                                                     |   |            |   |            |   |          |
| 0   | No                                      |                                                                                                                                                                                                                                    |                                                                                                                                                                     |   |            |   |            |   |          |
| 389 | qol10                                   | 10. During the past 30 days, for about how many days did PAIN make it hard for you to do your usual activities, such as self-care, work, or recreation?<br><i>Number of days</i>                                                   | text (integer, Min: 0, Max: 30)                                                                                                                                     |   |            |   |            |   |          |
| 390 | qol11                                   | 11. During the past 30 days, for about how many days have you felt SAD, BLUE, or DEPRESSED?<br><i>Number of days</i>                                                                                                               | text (integer, Min: 0, Max: 30)                                                                                                                                     |   |            |   |            |   |          |
| 391 | qol12                                   | 12. During the past 30 days, for about how many days have you felt WORRIED, TENSE, or ANXIOUS?<br><i>Number of days</i>                                                                                                            | text (integer, Min: 0, Max: 30)                                                                                                                                     |   |            |   |            |   |          |
| 392 | qol13                                   | 13. During the past 30 days, for about how many days have you felt you did NOT get ENOUGH REST or SLEEP?<br><i>Number of days</i>                                                                                                  | text (integer, Min: 0, Max: 30)                                                                                                                                     |   |            |   |            |   |          |
| 393 | qol14                                   | 14. During the past 30 days, for about how many days have you felt VERY HEALTHY AND FULL OF ENERGY?<br><i>Number of days</i>                                                                                                       | text (integer, Min: 0, Max: 30)                                                                                                                                     |   |            |   |            |   |          |
| 394 | health_related_quality_of_life_complete | Section Header: <i>Form Status</i><br>Complete?                                                                                                                                                                                    | dropdown<br><table border="1"> <tr> <td>0</td> <td>Incomplete</td> </tr> <tr> <td>1</td> <td>Unverified</td> </tr> <tr> <td>2</td> <td>Complete</td> </tr> </table> | 0 | Incomplete | 1 | Unverified | 2 | Complete |
| 0   | Incomplete                              |                                                                                                                                                                                                                                    |                                                                                                                                                                     |   |            |   |            |   |          |
| 1   | Unverified                              |                                                                                                                                                                                                                                    |                                                                                                                                                                     |   |            |   |            |   |          |
| 2   | Complete                                |                                                                                                                                                                                                                                    |                                                                                                                                                                     |   |            |   |            |   |          |

Instrument: **Opioid Use Stigma Scale** (opioid\_use\_stigma\_scale)

[^ Collapse](#)

|     |                     |                                                                                                                                                                                                                                                                                                                                                                          |                                                                                                                                                                                                                                   |   |                     |   |            |   |         |   |                  |
|-----|---------------------|--------------------------------------------------------------------------------------------------------------------------------------------------------------------------------------------------------------------------------------------------------------------------------------------------------------------------------------------------------------------------|-----------------------------------------------------------------------------------------------------------------------------------------------------------------------------------------------------------------------------------|---|---------------------|---|------------|---|---------|---|------------------|
| 395 | bdlabel             | Interviewer read: This first set of statements asks about some of your experiences, feelings, and opinions about those who use heroin or other opiate drugs, and have a substance use disorder. Please do your best to answer each statement whether you: [Show CARD] 1=Strongly disagree; 2=disagree; 3=Agree; or 4=Strongly agree. [SELECT ONE RESPONSE FOR EACH LINE] | descriptive<br>Field Annotation: @HIDDEN                                                                                                                                                                                          |   |                     |   |            |   |         |   |                  |
| 396 | bd1                 | BD1. People's attitudes make me feel worse about myself. U, K: bd1ru                                                                                                                                                                                                                                                                                                     | radio (Matrix)<br><table border="1"> <tr> <td>1</td> <td>1 Strongly Disagree</td> </tr> <tr> <td>2</td> <td>2 Disagree</td> </tr> <tr> <td>3</td> <td>3 Agree</td> </tr> <tr> <td>4</td> <td>4 Strongly Agree</td> </tr> </table> | 1 | 1 Strongly Disagree | 2 | 2 Disagree | 3 | 3 Agree | 4 | 4 Strongly Agree |
| 1   | 1 Strongly Disagree |                                                                                                                                                                                                                                                                                                                                                                          |                                                                                                                                                                                                                                   |   |                     |   |            |   |         |   |                  |
| 2   | 2 Disagree          |                                                                                                                                                                                                                                                                                                                                                                          |                                                                                                                                                                                                                                   |   |                     |   |            |   |         |   |                  |
| 3   | 3 Agree             |                                                                                                                                                                                                                                                                                                                                                                          |                                                                                                                                                                                                                                   |   |                     |   |            |   |         |   |                  |
| 4   | 4 Strongly Agree    |                                                                                                                                                                                                                                                                                                                                                                          |                                                                                                                                                                                                                                   |   |                     |   |            |   |         |   |                  |
| 397 | bd2                 | BD2. People who use heroin or opiate drugs lose jobs when their employers find out. U, K:bd2ru                                                                                                                                                                                                                                                                           | radio (Matrix)<br><table border="1"> <tr> <td>1</td> <td>1 Strongly Disagree</td> </tr> <tr> <td>2</td> <td>2 Disagree</td> </tr> <tr> <td>3</td> <td>3 Agree</td> </tr> <tr> <td>4</td> <td>4 Strongly Agree</td> </tr> </table> | 1 | 1 Strongly Disagree | 2 | 2 Disagree | 3 | 3 Agree | 4 | 4 Strongly Agree |
| 1   | 1 Strongly Disagree |                                                                                                                                                                                                                                                                                                                                                                          |                                                                                                                                                                                                                                   |   |                     |   |            |   |         |   |                  |
| 2   | 2 Disagree          |                                                                                                                                                                                                                                                                                                                                                                          |                                                                                                                                                                                                                                   |   |                     |   |            |   |         |   |                  |
| 3   | 3 Agree             |                                                                                                                                                                                                                                                                                                                                                                          |                                                                                                                                                                                                                                   |   |                     |   |            |   |         |   |                  |
| 4   | 4 Strongly Agree    |                                                                                                                                                                                                                                                                                                                                                                          |                                                                                                                                                                                                                                   |   |                     |   |            |   |         |   |                  |
| 398 | bd3                 | BD3. I feel I'm not as good a person as others because I use heroin or opiate drugs U, K: bd3ru                                                                                                                                                                                                                                                                          | radio (Matrix)<br><table border="1"> <tr> <td>1</td> <td>1 Strongly Disagree</td> </tr> <tr> <td>2</td> <td>2 Disagree</td> </tr> <tr> <td>3</td> <td>3 Agree</td> </tr> <tr> <td>4</td> <td>4 Strongly Agree</td> </tr> </table> | 1 | 1 Strongly Disagree | 2 | 2 Disagree | 3 | 3 Agree | 4 | 4 Strongly Agree |
| 1   | 1 Strongly Disagree |                                                                                                                                                                                                                                                                                                                                                                          |                                                                                                                                                                                                                                   |   |                     |   |            |   |         |   |                  |
| 2   | 2 Disagree          |                                                                                                                                                                                                                                                                                                                                                                          |                                                                                                                                                                                                                                   |   |                     |   |            |   |         |   |                  |
| 3   | 3 Agree             |                                                                                                                                                                                                                                                                                                                                                                          |                                                                                                                                                                                                                                   |   |                     |   |            |   |         |   |                  |
| 4   | 4 Strongly Agree    |                                                                                                                                                                                                                                                                                                                                                                          |                                                                                                                                                                                                                                   |   |                     |   |            |   |         |   |                  |

|     |      |                                                                                                                          |                                                                                            |
|-----|------|--------------------------------------------------------------------------------------------------------------------------|--------------------------------------------------------------------------------------------|
| 399 | bd4  | BD4. Most people think a person who uses heroin or opiate drugs is dirty U, K:bd4ru                                      | radio (Matrix)<br>1 1 Strongly Disagree<br>2 2 Disagree<br>3 3 Agree<br>4 4 Strongly Agree |
| 400 | bd5  | BD5. Using heroin or opiate drugs makes me feel unclean U, K: bd5ru                                                      | radio (Matrix)<br>1 1 Strongly Disagree<br>2 2 Disagree<br>3 3 Agree<br>4 4 Strongly Agree |
| 401 | bd6  | BD6. Since learning I have a substance use disorder, I feel set apart and isolated from the rest of the world U, K:bd6ru | radio (Matrix)<br>1 1 Strongly Disagree<br>2 2 Disagree<br>3 3 Agree<br>4 4 Strongly Agree |
| 402 | bd7  | BD7. Most people think a person with a substance use disorder is disgusting U, K:bd7ru                                   | radio (Matrix)<br>1 1 Strongly Disagree<br>2 2 Disagree<br>3 3 Agree<br>4 4 Strongly Agree |
| 403 | bd8  | BD8. Having a substance use disorder makes me feel like I'm a bad person U, K:bd8ru                                      | radio (Matrix)<br>1 1 Strongly Disagree<br>2 2 Disagree<br>3 3 Agree<br>4 4 Strongly Agree |
| 404 | bd9  | BD9. Most people with a substance use disorder are rejected when others find out U, K:bd9ru                              | radio (Matrix)<br>1 1 Strongly Disagree<br>2 2 Disagree<br>3 3 Agree<br>4 4 Strongly Agree |
| 405 | bd10 | BD10. Some people who know I use heroin or opiate drugs have grown more distant U, K: bd10ru                             | radio (Matrix)<br>1 1 Strongly Disagree<br>2 2 Disagree<br>3 3 Agree<br>4 4 Strongly Agree |
| 406 | bd11 | BD11. I worry that people may judge me when they learn I use heroin or opiate drugs U, K:bd11ru                          | radio (Matrix)<br>1 1 Strongly Disagree<br>2 2 Disagree<br>3 3 Agree<br>4 4 Strongly Agree |
| 407 | bd12 | BD12. I have been hurt by how people have reacted when learning I use heroin or opiate drugs U, K:bd12ru                 | radio (Matrix)<br>1 1 Strongly Disagree<br>2 2 Disagree<br>3 3 Agree<br>4 4 Strongly Agree |

|     |      |                                                                                                                                    |                                                                                            |
|-----|------|------------------------------------------------------------------------------------------------------------------------------------|--------------------------------------------------------------------------------------------|
| 408 | bd13 | BD13. I worry people who know I use heroin or opiate drugs will tell others U, K: bd13ru                                           | radio (Matrix)<br>1 1 Strongly Disagree<br>2 2 Disagree<br>3 3 Agree<br>4 4 Strongly Agree |
| 409 | bd14 | BD14. I regret having told some people that I used heroin or opiate drugs U, K:bd14ru                                              | radio (Matrix)<br>1 1 Strongly Disagree<br>2 2 Disagree<br>3 3 Agree<br>4 4 Strongly Agree |
| 410 | bd15 | BD15. Some people avoid touching me if they know I use heroin or opiate drugs U, K:bd15ru                                          | radio (Matrix)<br>1 1 Strongly Disagree<br>2 2 Disagree<br>3 3 Agree<br>4 4 Strongly Agree |
| 411 | bd16 | BD16. People I care about stopped calling after learning I use heroin or opiate drugs U, K: bd16ru                                 | radio (Matrix)<br>1 1 Strongly Disagree<br>2 2 Disagree<br>3 3 Agree<br>4 4 Strongly Agree |
| 412 | bd17 | BD17. Some people close to me are afraid others will reject them if it becomes known that I use heroin or opiate drugs U, K:bd17ru | radio (Matrix)<br>1 1 Strongly Disagree<br>2 2 Disagree<br>3 3 Agree<br>4 4 Strongly Agree |
| 413 | bd18 | BD18. People don't want me around their children once they know I use heroin or opiate drugs U, K:bd18ru                           | radio (Matrix)<br>1 1 Strongly Disagree<br>2 2 Disagree<br>3 3 Agree<br>4 4 Strongly Agree |
| 414 | bd19 | BD19. People have physically backed away from me when they learned I use heroin or opiate drugs U, K:bd19ru                        | radio (Matrix)<br>1 1 Strongly Disagree<br>2 2 Disagree<br>3 3 Agree<br>4 4 Strongly Agree |
| 415 | bd20 | BD20. Some people act as though it's my fault I have a substance use disorder U, K:bd20ru                                          | radio (Matrix)<br>1 1 Strongly Disagree<br>2 2 Disagree<br>3 3 Agree<br>4 4 Strongly Agree |
| 416 | bd21 | BD21. I have lost friends by telling them I use heroin or opiate drugs U, K:bd21ru                                                 | radio (Matrix)<br>1 1 Strongly Disagree<br>2 2 Disagree<br>3 3 Agree<br>4 4 Strongly Agree |

|     |                                  |                                                                                              |                                                                                                                                                                                                                       |   |                     |   |            |   |          |   |                  |
|-----|----------------------------------|----------------------------------------------------------------------------------------------|-----------------------------------------------------------------------------------------------------------------------------------------------------------------------------------------------------------------------|---|---------------------|---|------------|---|----------|---|------------------|
| 417 | bd22                             | BD22. People who know I use heroin or opiate drugs tend to ignore my good points U, K:bd22ru | radio (Matrix)<br><table border="1"> <tr><td>1</td><td>1 Strongly Disagree</td></tr> <tr><td>2</td><td>2 Disagree</td></tr> <tr><td>3</td><td>3 Agree</td></tr> <tr><td>4</td><td>4 Strongly Agree</td></tr> </table> | 1 | 1 Strongly Disagree | 2 | 2 Disagree | 3 | 3 Agree  | 4 | 4 Strongly Agree |
| 1   | 1 Strongly Disagree              |                                                                                              |                                                                                                                                                                                                                       |   |                     |   |            |   |          |   |                  |
| 2   | 2 Disagree                       |                                                                                              |                                                                                                                                                                                                                       |   |                     |   |            |   |          |   |                  |
| 3   | 3 Agree                          |                                                                                              |                                                                                                                                                                                                                       |   |                     |   |            |   |          |   |                  |
| 4   | 4 Strongly Agree                 |                                                                                              |                                                                                                                                                                                                                       |   |                     |   |            |   |          |   |                  |
| 418 | bd23                             | BD23. People seem afraid of me when they learn I use heroin or opiate drugs U, K: bd23ru     | radio (Matrix)<br><table border="1"> <tr><td>1</td><td>1 Strongly Disagree</td></tr> <tr><td>2</td><td>2 Disagree</td></tr> <tr><td>3</td><td>3 Agree</td></tr> <tr><td>4</td><td>4 Strongly Agree</td></tr> </table> | 1 | 1 Strongly Disagree | 2 | 2 Disagree | 3 | 3 Agree  | 4 | 4 Strongly Agree |
| 1   | 1 Strongly Disagree              |                                                                                              |                                                                                                                                                                                                                       |   |                     |   |            |   |          |   |                  |
| 2   | 2 Disagree                       |                                                                                              |                                                                                                                                                                                                                       |   |                     |   |            |   |          |   |                  |
| 3   | 3 Agree                          |                                                                                              |                                                                                                                                                                                                                       |   |                     |   |            |   |          |   |                  |
| 4   | 4 Strongly Agree                 |                                                                                              |                                                                                                                                                                                                                       |   |                     |   |            |   |          |   |                  |
| 419 | opioid_use_stigma_scale_complete | Section Header: <i>Form Status</i><br>Complete?                                              | dropdown<br><table border="1"> <tr><td>0</td><td>Incomplete</td></tr> <tr><td>1</td><td>Unverified</td></tr> <tr><td>2</td><td>Complete</td></tr> </table>                                                            | 0 | Incomplete          | 1 | Unverified | 2 | Complete |   |                  |
| 0   | Incomplete                       |                                                                                              |                                                                                                                                                                                                                       |   |                     |   |            |   |          |   |                  |
| 1   | Unverified                       |                                                                                              |                                                                                                                                                                                                                       |   |                     |   |            |   |          |   |                  |
| 2   | Complete                         |                                                                                              |                                                                                                                                                                                                                       |   |                     |   |            |   |          |   |                  |

Instrument: **CES-D 10** (cesd\_10)

[^ Collapse](#)

|     |                                                         |                                                                                                                                                                                         |                                                                                                                                                                                                                                                                                                                                               |   |                                              |   |                                         |   |                                                         |   |                                    |
|-----|---------------------------------------------------------|-----------------------------------------------------------------------------------------------------------------------------------------------------------------------------------------|-----------------------------------------------------------------------------------------------------------------------------------------------------------------------------------------------------------------------------------------------------------------------------------------------------------------------------------------------|---|----------------------------------------------|---|-----------------------------------------|---|---------------------------------------------------------|---|------------------------------------|
| 420 | script_cesd                                             | For each of the following statements, please choose the option that best describes how often you felt or behaved this way during the past week.<br><br>Number of days in the past week: | descriptive                                                                                                                                                                                                                                                                                                                                   |   |                                              |   |                                         |   |                                                         |   |                                    |
| 421 | cd1                                                     | 1. You were bothered by things that usually don't bother you U, K:cd1ru                                                                                                                 | radio (Matrix)<br><table border="1"> <tr><td>0</td><td>Rarely or none of the time (less than 1 day)</td></tr> <tr><td>1</td><td>Some or a little of the time (1-2 days)</td></tr> <tr><td>2</td><td>Occasionally or a moderate amount of the time(3-4 days)</td></tr> <tr><td>3</td><td>Most or all of the time (5-7 days)</td></tr> </table> | 0 | Rarely or none of the time (less than 1 day) | 1 | Some or a little of the time (1-2 days) | 2 | Occasionally or a moderate amount of the time(3-4 days) | 3 | Most or all of the time (5-7 days) |
| 0   | Rarely or none of the time (less than 1 day)            |                                                                                                                                                                                         |                                                                                                                                                                                                                                                                                                                                               |   |                                              |   |                                         |   |                                                         |   |                                    |
| 1   | Some or a little of the time (1-2 days)                 |                                                                                                                                                                                         |                                                                                                                                                                                                                                                                                                                                               |   |                                              |   |                                         |   |                                                         |   |                                    |
| 2   | Occasionally or a moderate amount of the time(3-4 days) |                                                                                                                                                                                         |                                                                                                                                                                                                                                                                                                                                               |   |                                              |   |                                         |   |                                                         |   |                                    |
| 3   | Most or all of the time (5-7 days)                      |                                                                                                                                                                                         |                                                                                                                                                                                                                                                                                                                                               |   |                                              |   |                                         |   |                                                         |   |                                    |
| 422 | cd2                                                     | 2. You had trouble keeping your mind on what you were doing U, K:cd2ru                                                                                                                  | radio (Matrix)<br><table border="1"> <tr><td>0</td><td>Rarely or none of the time (less than 1 day)</td></tr> <tr><td>1</td><td>Some or a little of the time (1-2 days)</td></tr> <tr><td>2</td><td>Occasionally or a moderate amount of the time(3-4 days)</td></tr> <tr><td>3</td><td>Most or all of the time (5-7 days)</td></tr> </table> | 0 | Rarely or none of the time (less than 1 day) | 1 | Some or a little of the time (1-2 days) | 2 | Occasionally or a moderate amount of the time(3-4 days) | 3 | Most or all of the time (5-7 days) |
| 0   | Rarely or none of the time (less than 1 day)            |                                                                                                                                                                                         |                                                                                                                                                                                                                                                                                                                                               |   |                                              |   |                                         |   |                                                         |   |                                    |
| 1   | Some or a little of the time (1-2 days)                 |                                                                                                                                                                                         |                                                                                                                                                                                                                                                                                                                                               |   |                                              |   |                                         |   |                                                         |   |                                    |
| 2   | Occasionally or a moderate amount of the time(3-4 days) |                                                                                                                                                                                         |                                                                                                                                                                                                                                                                                                                                               |   |                                              |   |                                         |   |                                                         |   |                                    |
| 3   | Most or all of the time (5-7 days)                      |                                                                                                                                                                                         |                                                                                                                                                                                                                                                                                                                                               |   |                                              |   |                                         |   |                                                         |   |                                    |
| 423 | cd3                                                     | 3. You felt depressed U, K:cd3ru                                                                                                                                                        | radio (Matrix)<br><table border="1"> <tr><td>0</td><td>Rarely or none of the time (less than 1 day)</td></tr> <tr><td>1</td><td>Some or a little of the time (1-2 days)</td></tr> <tr><td>2</td><td>Occasionally or a moderate amount of the time(3-4 days)</td></tr> <tr><td>3</td><td>Most or all of the time (5-7 days)</td></tr> </table> | 0 | Rarely or none of the time (less than 1 day) | 1 | Some or a little of the time (1-2 days) | 2 | Occasionally or a moderate amount of the time(3-4 days) | 3 | Most or all of the time (5-7 days) |
| 0   | Rarely or none of the time (less than 1 day)            |                                                                                                                                                                                         |                                                                                                                                                                                                                                                                                                                                               |   |                                              |   |                                         |   |                                                         |   |                                    |
| 1   | Some or a little of the time (1-2 days)                 |                                                                                                                                                                                         |                                                                                                                                                                                                                                                                                                                                               |   |                                              |   |                                         |   |                                                         |   |                                    |
| 2   | Occasionally or a moderate amount of the time(3-4 days) |                                                                                                                                                                                         |                                                                                                                                                                                                                                                                                                                                               |   |                                              |   |                                         |   |                                                         |   |                                    |
| 3   | Most or all of the time (5-7 days)                      |                                                                                                                                                                                         |                                                                                                                                                                                                                                                                                                                                               |   |                                              |   |                                         |   |                                                         |   |                                    |
| 424 | cd4                                                     | 4. You felt that everything you did was an effort U, K:cd4ru                                                                                                                            | radio (Matrix)<br><table border="1"> <tr><td>0</td><td>Rarely or none of the time (less than 1 day)</td></tr> <tr><td>1</td><td>Some or a little of the time (1-2 days)</td></tr> <tr><td>2</td><td>Occasionally or a moderate amount of the time(3-4 days)</td></tr> <tr><td>3</td><td>Most or all of the time (5-7 days)</td></tr> </table> | 0 | Rarely or none of the time (less than 1 day) | 1 | Some or a little of the time (1-2 days) | 2 | Occasionally or a moderate amount of the time(3-4 days) | 3 | Most or all of the time (5-7 days) |
| 0   | Rarely or none of the time (less than 1 day)            |                                                                                                                                                                                         |                                                                                                                                                                                                                                                                                                                                               |   |                                              |   |                                         |   |                                                         |   |                                    |
| 1   | Some or a little of the time (1-2 days)                 |                                                                                                                                                                                         |                                                                                                                                                                                                                                                                                                                                               |   |                                              |   |                                         |   |                                                         |   |                                    |
| 2   | Occasionally or a moderate amount of the time(3-4 days) |                                                                                                                                                                                         |                                                                                                                                                                                                                                                                                                                                               |   |                                              |   |                                         |   |                                                         |   |                                    |
| 3   | Most or all of the time (5-7 days)                      |                                                                                                                                                                                         |                                                                                                                                                                                                                                                                                                                                               |   |                                              |   |                                         |   |                                                         |   |                                    |
| 425 | cd5                                                     | 5. You felt hopeful about the future U, K:cd5ru                                                                                                                                         | radio (Matrix)<br><table border="1"> <tr><td>0</td><td>Rarely or none of the time (less than 1 day)</td></tr> <tr><td>1</td><td>Some or a little of the time (1-2 days)</td></tr> <tr><td>2</td><td>Occasionally or a moderate amount of the time(3-4 days)</td></tr> <tr><td>3</td><td>Most or all of the time (5-7 days)</td></tr> </table> | 0 | Rarely or none of the time (less than 1 day) | 1 | Some or a little of the time (1-2 days) | 2 | Occasionally or a moderate amount of the time(3-4 days) | 3 | Most or all of the time (5-7 days) |
| 0   | Rarely or none of the time (less than 1 day)            |                                                                                                                                                                                         |                                                                                                                                                                                                                                                                                                                                               |   |                                              |   |                                         |   |                                                         |   |                                    |
| 1   | Some or a little of the time (1-2 days)                 |                                                                                                                                                                                         |                                                                                                                                                                                                                                                                                                                                               |   |                                              |   |                                         |   |                                                         |   |                                    |
| 2   | Occasionally or a moderate amount of the time(3-4 days) |                                                                                                                                                                                         |                                                                                                                                                                                                                                                                                                                                               |   |                                              |   |                                         |   |                                                         |   |                                    |
| 3   | Most or all of the time (5-7 days)                      |                                                                                                                                                                                         |                                                                                                                                                                                                                                                                                                                                               |   |                                              |   |                                         |   |                                                         |   |                                    |

|                                  |                                                         |                                                                                                                                                                                                                                                                                                                                                                                                                                                                                    |                                                                                                                                                                                                                                                                                                                                                   |   |                                              |   |                                         |   |                                                         |   |                                    |
|----------------------------------|---------------------------------------------------------|------------------------------------------------------------------------------------------------------------------------------------------------------------------------------------------------------------------------------------------------------------------------------------------------------------------------------------------------------------------------------------------------------------------------------------------------------------------------------------|---------------------------------------------------------------------------------------------------------------------------------------------------------------------------------------------------------------------------------------------------------------------------------------------------------------------------------------------------|---|----------------------------------------------|---|-----------------------------------------|---|---------------------------------------------------------|---|------------------------------------|
| 426                              | cd6                                                     | 6. You felt fearful U, K:cd6ru                                                                                                                                                                                                                                                                                                                                                                                                                                                     | <p>radio (Matrix)</p> <table border="1"> <tr><td>0</td><td>Rarely or none of the time (less than 1 day)</td></tr> <tr><td>1</td><td>Some or a little of the time (1-2 days)</td></tr> <tr><td>2</td><td>Occasionally or a moderate amount of the time(3-4 days)</td></tr> <tr><td>3</td><td>Most or all of the time (5-7 days)</td></tr> </table> | 0 | Rarely or none of the time (less than 1 day) | 1 | Some or a little of the time (1-2 days) | 2 | Occasionally or a moderate amount of the time(3-4 days) | 3 | Most or all of the time (5-7 days) |
| 0                                | Rarely or none of the time (less than 1 day)            |                                                                                                                                                                                                                                                                                                                                                                                                                                                                                    |                                                                                                                                                                                                                                                                                                                                                   |   |                                              |   |                                         |   |                                                         |   |                                    |
| 1                                | Some or a little of the time (1-2 days)                 |                                                                                                                                                                                                                                                                                                                                                                                                                                                                                    |                                                                                                                                                                                                                                                                                                                                                   |   |                                              |   |                                         |   |                                                         |   |                                    |
| 2                                | Occasionally or a moderate amount of the time(3-4 days) |                                                                                                                                                                                                                                                                                                                                                                                                                                                                                    |                                                                                                                                                                                                                                                                                                                                                   |   |                                              |   |                                         |   |                                                         |   |                                    |
| 3                                | Most or all of the time (5-7 days)                      |                                                                                                                                                                                                                                                                                                                                                                                                                                                                                    |                                                                                                                                                                                                                                                                                                                                                   |   |                                              |   |                                         |   |                                                         |   |                                    |
| 427                              | cd7                                                     | 7. Your sleep was restless U, K:cd7ru                                                                                                                                                                                                                                                                                                                                                                                                                                              | <p>radio (Matrix)</p> <table border="1"> <tr><td>0</td><td>Rarely or none of the time (less than 1 day)</td></tr> <tr><td>1</td><td>Some or a little of the time (1-2 days)</td></tr> <tr><td>2</td><td>Occasionally or a moderate amount of the time(3-4 days)</td></tr> <tr><td>3</td><td>Most or all of the time (5-7 days)</td></tr> </table> | 0 | Rarely or none of the time (less than 1 day) | 1 | Some or a little of the time (1-2 days) | 2 | Occasionally or a moderate amount of the time(3-4 days) | 3 | Most or all of the time (5-7 days) |
| 0                                | Rarely or none of the time (less than 1 day)            |                                                                                                                                                                                                                                                                                                                                                                                                                                                                                    |                                                                                                                                                                                                                                                                                                                                                   |   |                                              |   |                                         |   |                                                         |   |                                    |
| 1                                | Some or a little of the time (1-2 days)                 |                                                                                                                                                                                                                                                                                                                                                                                                                                                                                    |                                                                                                                                                                                                                                                                                                                                                   |   |                                              |   |                                         |   |                                                         |   |                                    |
| 2                                | Occasionally or a moderate amount of the time(3-4 days) |                                                                                                                                                                                                                                                                                                                                                                                                                                                                                    |                                                                                                                                                                                                                                                                                                                                                   |   |                                              |   |                                         |   |                                                         |   |                                    |
| 3                                | Most or all of the time (5-7 days)                      |                                                                                                                                                                                                                                                                                                                                                                                                                                                                                    |                                                                                                                                                                                                                                                                                                                                                   |   |                                              |   |                                         |   |                                                         |   |                                    |
| 428                              | cd8                                                     | 8. You were happy U, K:cd8ru                                                                                                                                                                                                                                                                                                                                                                                                                                                       | <p>radio (Matrix)</p> <table border="1"> <tr><td>0</td><td>Rarely or none of the time (less than 1 day)</td></tr> <tr><td>1</td><td>Some or a little of the time (1-2 days)</td></tr> <tr><td>2</td><td>Occasionally or a moderate amount of the time(3-4 days)</td></tr> <tr><td>3</td><td>Most or all of the time (5-7 days)</td></tr> </table> | 0 | Rarely or none of the time (less than 1 day) | 1 | Some or a little of the time (1-2 days) | 2 | Occasionally or a moderate amount of the time(3-4 days) | 3 | Most or all of the time (5-7 days) |
| 0                                | Rarely or none of the time (less than 1 day)            |                                                                                                                                                                                                                                                                                                                                                                                                                                                                                    |                                                                                                                                                                                                                                                                                                                                                   |   |                                              |   |                                         |   |                                                         |   |                                    |
| 1                                | Some or a little of the time (1-2 days)                 |                                                                                                                                                                                                                                                                                                                                                                                                                                                                                    |                                                                                                                                                                                                                                                                                                                                                   |   |                                              |   |                                         |   |                                                         |   |                                    |
| 2                                | Occasionally or a moderate amount of the time(3-4 days) |                                                                                                                                                                                                                                                                                                                                                                                                                                                                                    |                                                                                                                                                                                                                                                                                                                                                   |   |                                              |   |                                         |   |                                                         |   |                                    |
| 3                                | Most or all of the time (5-7 days)                      |                                                                                                                                                                                                                                                                                                                                                                                                                                                                                    |                                                                                                                                                                                                                                                                                                                                                   |   |                                              |   |                                         |   |                                                         |   |                                    |
| 429                              | cd9                                                     | 9. You felt lonely U, K:cd9ru                                                                                                                                                                                                                                                                                                                                                                                                                                                      | <p>radio (Matrix)</p> <table border="1"> <tr><td>0</td><td>Rarely or none of the time (less than 1 day)</td></tr> <tr><td>1</td><td>Some or a little of the time (1-2 days)</td></tr> <tr><td>2</td><td>Occasionally or a moderate amount of the time(3-4 days)</td></tr> <tr><td>3</td><td>Most or all of the time (5-7 days)</td></tr> </table> | 0 | Rarely or none of the time (less than 1 day) | 1 | Some or a little of the time (1-2 days) | 2 | Occasionally or a moderate amount of the time(3-4 days) | 3 | Most or all of the time (5-7 days) |
| 0                                | Rarely or none of the time (less than 1 day)            |                                                                                                                                                                                                                                                                                                                                                                                                                                                                                    |                                                                                                                                                                                                                                                                                                                                                   |   |                                              |   |                                         |   |                                                         |   |                                    |
| 1                                | Some or a little of the time (1-2 days)                 |                                                                                                                                                                                                                                                                                                                                                                                                                                                                                    |                                                                                                                                                                                                                                                                                                                                                   |   |                                              |   |                                         |   |                                                         |   |                                    |
| 2                                | Occasionally or a moderate amount of the time(3-4 days) |                                                                                                                                                                                                                                                                                                                                                                                                                                                                                    |                                                                                                                                                                                                                                                                                                                                                   |   |                                              |   |                                         |   |                                                         |   |                                    |
| 3                                | Most or all of the time (5-7 days)                      |                                                                                                                                                                                                                                                                                                                                                                                                                                                                                    |                                                                                                                                                                                                                                                                                                                                                   |   |                                              |   |                                         |   |                                                         |   |                                    |
| 430                              | cd10                                                    | 10. You could not get "going" U, K:cd10ru                                                                                                                                                                                                                                                                                                                                                                                                                                          | <p>radio (Matrix)</p> <table border="1"> <tr><td>0</td><td>Rarely or none of the time (less than 1 day)</td></tr> <tr><td>1</td><td>Some or a little of the time (1-2 days)</td></tr> <tr><td>2</td><td>Occasionally or a moderate amount of the time(3-4 days)</td></tr> <tr><td>3</td><td>Most or all of the time (5-7 days)</td></tr> </table> | 0 | Rarely or none of the time (less than 1 day) | 1 | Some or a little of the time (1-2 days) | 2 | Occasionally or a moderate amount of the time(3-4 days) | 3 | Most or all of the time (5-7 days) |
| 0                                | Rarely or none of the time (less than 1 day)            |                                                                                                                                                                                                                                                                                                                                                                                                                                                                                    |                                                                                                                                                                                                                                                                                                                                                   |   |                                              |   |                                         |   |                                                         |   |                                    |
| 1                                | Some or a little of the time (1-2 days)                 |                                                                                                                                                                                                                                                                                                                                                                                                                                                                                    |                                                                                                                                                                                                                                                                                                                                                   |   |                                              |   |                                         |   |                                                         |   |                                    |
| 2                                | Occasionally or a moderate amount of the time(3-4 days) |                                                                                                                                                                                                                                                                                                                                                                                                                                                                                    |                                                                                                                                                                                                                                                                                                                                                   |   |                                              |   |                                         |   |                                                         |   |                                    |
| 3                                | Most or all of the time (5-7 days)                      |                                                                                                                                                                                                                                                                                                                                                                                                                                                                                    |                                                                                                                                                                                                                                                                                                                                                   |   |                                              |   |                                         |   |                                                         |   |                                    |
| 431                              | cesd_10_complete                                        | Section Header: <i>Form Status</i><br>Complete?                                                                                                                                                                                                                                                                                                                                                                                                                                    | <p>dropdown</p> <table border="1"> <tr><td>0</td><td>Incomplete</td></tr> <tr><td>1</td><td>Unverified</td></tr> <tr><td>2</td><td>Complete</td></tr> </table>                                                                                                                                                                                    | 0 | Incomplete                                   | 1 | Unverified                              | 2 | Complete                                                |   |                                    |
| 0                                | Incomplete                                              |                                                                                                                                                                                                                                                                                                                                                                                                                                                                                    |                                                                                                                                                                                                                                                                                                                                                   |   |                                              |   |                                         |   |                                                         |   |                                    |
| 1                                | Unverified                                              |                                                                                                                                                                                                                                                                                                                                                                                                                                                                                    |                                                                                                                                                                                                                                                                                                                                                   |   |                                              |   |                                         |   |                                                         |   |                                    |
| 2                                | Complete                                                |                                                                                                                                                                                                                                                                                                                                                                                                                                                                                    |                                                                                                                                                                                                                                                                                                                                                   |   |                                              |   |                                         |   |                                                         |   |                                    |
| Instrument: <b>AUDIT</b> (audit) |                                                         |                                                                                                                                                                                                                                                                                                                                                                                                                                                                                    | <a href="#">^ Collapse</a>                                                                                                                                                                                                                                                                                                                        |   |                                              |   |                                         |   |                                                         |   |                                    |
| 432                              | auditlabel                                              | <p>The next series of questions are going to ask you alcohol consumption related questions. By alcohol consumption we mean your use of wine, beer, vodka (or any other spirit, like cognac, braga). In case you do not drink specific beverage, choose the smallest portion. This information will be used only by the research team and will not be shared with any program staff.</p> <p>One drink is equivalent to 40 ml of strong spirits, 140ml of wine, or 330ml of beer</p> | <p>descriptive<br/>Field Annotation: @HIDDEN</p>                                                                                                                                                                                                                                                                                                  |   |                                              |   |                                         |   |                                                         |   |                                    |

|                                                          |                        |                                                                                                                                                                                                                                                                                                                              |                                                                                                                                                                                                                                                                                                     |   |            |   |                   |   |                      |   |                     |   |                        |
|----------------------------------------------------------|------------------------|------------------------------------------------------------------------------------------------------------------------------------------------------------------------------------------------------------------------------------------------------------------------------------------------------------------------------|-----------------------------------------------------------------------------------------------------------------------------------------------------------------------------------------------------------------------------------------------------------------------------------------------------|---|------------|---|-------------------|---|----------------------|---|---------------------|---|------------------------|
| 433                                                      | audit1                 | 1. How often did you have a drink containing alcohol? U, K:audit1ru                                                                                                                                                                                                                                                          | radio<br><table border="1"> <tr><td>0</td><td>Never</td></tr> <tr><td>1</td><td>Monthly or less</td></tr> <tr><td>2</td><td>2 to 4 times a month</td></tr> <tr><td>3</td><td>2 to 3 times a week</td></tr> <tr><td>4</td><td>4 or more times a week</td></tr> </table><br>Field Annotation: @HIDDEN | 0 | Never      | 1 | Monthly or less   | 2 | 2 to 4 times a month | 3 | 2 to 3 times a week | 4 | 4 or more times a week |
| 0                                                        | Never                  |                                                                                                                                                                                                                                                                                                                              |                                                                                                                                                                                                                                                                                                     |   |            |   |                   |   |                      |   |                     |   |                        |
| 1                                                        | Monthly or less        |                                                                                                                                                                                                                                                                                                                              |                                                                                                                                                                                                                                                                                                     |   |            |   |                   |   |                      |   |                     |   |                        |
| 2                                                        | 2 to 4 times a month   |                                                                                                                                                                                                                                                                                                                              |                                                                                                                                                                                                                                                                                                     |   |            |   |                   |   |                      |   |                     |   |                        |
| 3                                                        | 2 to 3 times a week    |                                                                                                                                                                                                                                                                                                                              |                                                                                                                                                                                                                                                                                                     |   |            |   |                   |   |                      |   |                     |   |                        |
| 4                                                        | 4 or more times a week |                                                                                                                                                                                                                                                                                                                              |                                                                                                                                                                                                                                                                                                     |   |            |   |                   |   |                      |   |                     |   |                        |
| 434                                                      | audit2                 | 2. How many units of alcohol do you drink on a typical day when you are drinking? U, K:audit2ru                                                                                                                                                                                                                              | radio<br><table border="1"> <tr><td>0</td><td>1-2</td></tr> <tr><td>1</td><td>3-4</td></tr> <tr><td>2</td><td>5-6</td></tr> <tr><td>3</td><td>7-8</td></tr> <tr><td>4</td><td>10+</td></tr> </table><br>Field Annotation: @HIDDEN                                                                   | 0 | 1-2        | 1 | 3-4               | 2 | 5-6                  | 3 | 7-8                 | 4 | 10+                    |
| 0                                                        | 1-2                    |                                                                                                                                                                                                                                                                                                                              |                                                                                                                                                                                                                                                                                                     |   |            |   |                   |   |                      |   |                     |   |                        |
| 1                                                        | 3-4                    |                                                                                                                                                                                                                                                                                                                              |                                                                                                                                                                                                                                                                                                     |   |            |   |                   |   |                      |   |                     |   |                        |
| 2                                                        | 5-6                    |                                                                                                                                                                                                                                                                                                                              |                                                                                                                                                                                                                                                                                                     |   |            |   |                   |   |                      |   |                     |   |                        |
| 3                                                        | 7-8                    |                                                                                                                                                                                                                                                                                                                              |                                                                                                                                                                                                                                                                                                     |   |            |   |                   |   |                      |   |                     |   |                        |
| 4                                                        | 10+                    |                                                                                                                                                                                                                                                                                                                              |                                                                                                                                                                                                                                                                                                     |   |            |   |                   |   |                      |   |                     |   |                        |
| 435                                                      | audit3                 | 3. How often have you had 6 or more units if female, or 8 or more if male, on a single occasion in the last year? U, K:audit3ru                                                                                                                                                                                              | radio<br><table border="1"> <tr><td>0</td><td>Never</td></tr> <tr><td>1</td><td>Less than monthly</td></tr> <tr><td>2</td><td>Monthly</td></tr> <tr><td>3</td><td>Weekly</td></tr> <tr><td>4</td><td>Daily or almost daily</td></tr> </table><br>Field Annotation: @HIDDEN                          | 0 | Never      | 1 | Less than monthly | 2 | Monthly              | 3 | Weekly              | 4 | Daily or almost daily  |
| 0                                                        | Never                  |                                                                                                                                                                                                                                                                                                                              |                                                                                                                                                                                                                                                                                                     |   |            |   |                   |   |                      |   |                     |   |                        |
| 1                                                        | Less than monthly      |                                                                                                                                                                                                                                                                                                                              |                                                                                                                                                                                                                                                                                                     |   |            |   |                   |   |                      |   |                     |   |                        |
| 2                                                        | Monthly                |                                                                                                                                                                                                                                                                                                                              |                                                                                                                                                                                                                                                                                                     |   |            |   |                   |   |                      |   |                     |   |                        |
| 3                                                        | Weekly                 |                                                                                                                                                                                                                                                                                                                              |                                                                                                                                                                                                                                                                                                     |   |            |   |                   |   |                      |   |                     |   |                        |
| 4                                                        | Daily or almost daily  |                                                                                                                                                                                                                                                                                                                              |                                                                                                                                                                                                                                                                                                     |   |            |   |                   |   |                      |   |                     |   |                        |
| 436                                                      | audit11                | Audit Total Score                                                                                                                                                                                                                                                                                                            | calc<br>Calculation: [audit1]+[audit2]+[audit3]<br>Field Annotation: @HIDDEN                                                                                                                                                                                                                        |   |            |   |                   |   |                      |   |                     |   |                        |
| 437                                                      | audit_complete         | Section Header: <i>Form Status</i><br>Complete?                                                                                                                                                                                                                                                                              | dropdown<br><table border="1"> <tr><td>0</td><td>Incomplete</td></tr> <tr><td>1</td><td>Unverified</td></tr> <tr><td>2</td><td>Complete</td></tr> </table>                                                                                                                                          | 0 | Incomplete | 1 | Unverified        | 2 | Complete             |   |                     |   |                        |
| 0                                                        | Incomplete             |                                                                                                                                                                                                                                                                                                                              |                                                                                                                                                                                                                                                                                                     |   |            |   |                   |   |                      |   |                     |   |                        |
| 1                                                        | Unverified             |                                                                                                                                                                                                                                                                                                                              |                                                                                                                                                                                                                                                                                                     |   |            |   |                   |   |                      |   |                     |   |                        |
| 2                                                        | Complete               |                                                                                                                                                                                                                                                                                                                              |                                                                                                                                                                                                                                                                                                     |   |            |   |                   |   |                      |   |                     |   |                        |
| Instrument: <b>Sex Risk Behavior</b> (sex_risk_behavior) |                        |                                                                                                                                                                                                                                                                                                                              | <a href="#">^ Collapse</a>                                                                                                                                                                                                                                                                          |   |            |   |                   |   |                      |   |                     |   |                        |
| 438                                                      | sxlabel                | This section is going to ask you sensitive questions about your sexual activity in the last 90 days (3 months). The information you provide is solely being used for research purposes by our research team and will not be linked to your name. This information is strictly confidential. Please be as honest as possible. | descriptive                                                                                                                                                                                                                                                                                         |   |            |   |                   |   |                      |   |                     |   |                        |
| 439                                                      | sx1                    | 1. Have you EVER exchanged sex for any type of material reward? U, K:sx1ru                                                                                                                                                                                                                                                   | radio<br><table border="1"> <tr><td>1</td><td>Yes</td></tr> <tr><td>0</td><td>No</td></tr> </table>                                                                                                                                                                                                 | 1 | Yes        | 0 | No                |   |                      |   |                     |   |                        |
| 1                                                        | Yes                    |                                                                                                                                                                                                                                                                                                                              |                                                                                                                                                                                                                                                                                                     |   |            |   |                   |   |                      |   |                     |   |                        |
| 0                                                        | No                     |                                                                                                                                                                                                                                                                                                                              |                                                                                                                                                                                                                                                                                                     |   |            |   |                   |   |                      |   |                     |   |                        |
| 440                                                      | sx2                    | 2. Have you EVER been forced to have sex against your will? U, K:sx2ru                                                                                                                                                                                                                                                       | radio<br><table border="1"> <tr><td>1</td><td>Yes</td></tr> <tr><td>0</td><td>No</td></tr> </table>                                                                                                                                                                                                 | 1 | Yes        | 0 | No                |   |                      |   |                     |   |                        |
| 1                                                        | Yes                    |                                                                                                                                                                                                                                                                                                                              |                                                                                                                                                                                                                                                                                                     |   |            |   |                   |   |                      |   |                     |   |                        |
| 0                                                        | No                     |                                                                                                                                                                                                                                                                                                                              |                                                                                                                                                                                                                                                                                                     |   |            |   |                   |   |                      |   |                     |   |                        |
| 441                                                      | sx3                    | 3. Have you had sex (vaginal, anal) with anyone in the last 90 days? U, K:sx3ru                                                                                                                                                                                                                                              | radio<br><table border="1"> <tr><td>1</td><td>Yes</td></tr> <tr><td>0</td><td>No</td></tr> </table>                                                                                                                                                                                                 | 1 | Yes        | 0 | No                |   |                      |   |                     |   |                        |
| 1                                                        | Yes                    |                                                                                                                                                                                                                                                                                                                              |                                                                                                                                                                                                                                                                                                     |   |            |   |                   |   |                      |   |                     |   |                        |
| 0                                                        | No                     |                                                                                                                                                                                                                                                                                                                              |                                                                                                                                                                                                                                                                                                     |   |            |   |                   |   |                      |   |                     |   |                        |
| 442                                                      | sxlabel2               | The following questions ask with whom you have had sex in the past 90 days and whether you used condoms during sexual contact with these partners                                                                                                                                                                            | descriptive                                                                                                                                                                                                                                                                                         |   |            |   |                   |   |                      |   |                     |   |                        |

|     |                                                   |                                                                                                                                                                                                   |                                                                                                                                                                                                                                                                                                                                                                                                                                                                                                                                                                                                                                   |   |            |                                         |            |        |                                                                                                         |   |        |                                                                                                |   |        |                                                                     |   |        |                                                 |
|-----|---------------------------------------------------|---------------------------------------------------------------------------------------------------------------------------------------------------------------------------------------------------|-----------------------------------------------------------------------------------------------------------------------------------------------------------------------------------------------------------------------------------------------------------------------------------------------------------------------------------------------------------------------------------------------------------------------------------------------------------------------------------------------------------------------------------------------------------------------------------------------------------------------------------|---|------------|-----------------------------------------|------------|--------|---------------------------------------------------------------------------------------------------------|---|--------|------------------------------------------------------------------------------------------------|---|--------|---------------------------------------------------------------------|---|--------|-------------------------------------------------|
| 443 | sx4                                               | 4. In the past 90 days, have you exchanged sex for any type of material reward? U, K:sx4ru                                                                                                        | radio<br><table border="1"> <tr><td>1</td><td>Yes</td></tr> <tr><td>0</td><td>No</td></tr> </table>                                                                                                                                                                                                                                                                                                                                                                                                                                                                                                                               | 1 | Yes        | 0                                       | No         |        |                                                                                                         |   |        |                                                                                                |   |        |                                                                     |   |        |                                                 |
| 1   | Yes                                               |                                                                                                                                                                                                   |                                                                                                                                                                                                                                                                                                                                                                                                                                                                                                                                                                                                                                   |   |            |                                         |            |        |                                                                                                         |   |        |                                                                                                |   |        |                                                                     |   |        |                                                 |
| 0   | No                                                |                                                                                                                                                                                                   |                                                                                                                                                                                                                                                                                                                                                                                                                                                                                                                                                                                                                                   |   |            |                                         |            |        |                                                                                                         |   |        |                                                                                                |   |        |                                                                     |   |        |                                                 |
| 444 | sx5                                               | 5. In the past 90 days, how many sexual partners have you had either vaginal or anal sex with? U, K:sx5ru<br><i>partners</i>                                                                      | text (integer, Min: 1, Max: 30)                                                                                                                                                                                                                                                                                                                                                                                                                                                                                                                                                                                                   |   |            |                                         |            |        |                                                                                                         |   |        |                                                                                                |   |        |                                                                     |   |        |                                                 |
| 445 | sx6                                               | 6. Among these sexual partners over the past 90 days, about how many of them did you have vaginal or anal sex WITHOUT a condom? U, K:sx6ru<br><i>partners</i>                                     | text (integer, Min: 0, Max: 30)                                                                                                                                                                                                                                                                                                                                                                                                                                                                                                                                                                                                   |   |            |                                         |            |        |                                                                                                         |   |        |                                                                                                |   |        |                                                                     |   |        |                                                 |
| 446 | sx5_ctrl<br>Show the field ONLY if: [sx6] > [sx5] | Warning: the value entered is not consistent with previous answers. Please check your answer.                                                                                                     | descriptive                                                                                                                                                                                                                                                                                                                                                                                                                                                                                                                                                                                                                       |   |            |                                         |            |        |                                                                                                         |   |        |                                                                                                |   |        |                                                                     |   |        |                                                 |
| 447 | sx7                                               | 7. Now I want you to think about the partners in the past 90 days that you had UNPROTECTED vaginal or anal sex (no condom), please check how you would describe any of these partners: U, K:sx7ru | checkbox<br><table border="1"> <tr><td>1</td><td>sx7__1</td><td>At least one of these partners was HIV+</td></tr> <tr><td>2</td><td>sx7__2</td><td>At least one of these partners was someone with whom I exchanged money (paid for it or got paid for it)</td></tr> <tr><td>3</td><td>sx7__3</td><td>Was my regular partner that I have been having sex with for a long time (not a paying partner)</td></tr> <tr><td>4</td><td>sx7__4</td><td>Was a casual partner that I would not describe as a regular partner</td></tr> <tr><td>5</td><td>sx7__5</td><td>Was a sexual partner that I also use drugs with</td></tr> </table> | 1 | sx7__1     | At least one of these partners was HIV+ | 2          | sx7__2 | At least one of these partners was someone with whom I exchanged money (paid for it or got paid for it) | 3 | sx7__3 | Was my regular partner that I have been having sex with for a long time (not a paying partner) | 4 | sx7__4 | Was a casual partner that I would not describe as a regular partner | 5 | sx7__5 | Was a sexual partner that I also use drugs with |
| 1   | sx7__1                                            | At least one of these partners was HIV+                                                                                                                                                           |                                                                                                                                                                                                                                                                                                                                                                                                                                                                                                                                                                                                                                   |   |            |                                         |            |        |                                                                                                         |   |        |                                                                                                |   |        |                                                                     |   |        |                                                 |
| 2   | sx7__2                                            | At least one of these partners was someone with whom I exchanged money (paid for it or got paid for it)                                                                                           |                                                                                                                                                                                                                                                                                                                                                                                                                                                                                                                                                                                                                                   |   |            |                                         |            |        |                                                                                                         |   |        |                                                                                                |   |        |                                                                     |   |        |                                                 |
| 3   | sx7__3                                            | Was my regular partner that I have been having sex with for a long time (not a paying partner)                                                                                                    |                                                                                                                                                                                                                                                                                                                                                                                                                                                                                                                                                                                                                                   |   |            |                                         |            |        |                                                                                                         |   |        |                                                                                                |   |        |                                                                     |   |        |                                                 |
| 4   | sx7__4                                            | Was a casual partner that I would not describe as a regular partner                                                                                                                               |                                                                                                                                                                                                                                                                                                                                                                                                                                                                                                                                                                                                                                   |   |            |                                         |            |        |                                                                                                         |   |        |                                                                                                |   |        |                                                                     |   |        |                                                 |
| 5   | sx7__5                                            | Was a sexual partner that I also use drugs with                                                                                                                                                   |                                                                                                                                                                                                                                                                                                                                                                                                                                                                                                                                                                                                                                   |   |            |                                         |            |        |                                                                                                         |   |        |                                                                                                |   |        |                                                                     |   |        |                                                 |
| 448 | sx8                                               | 8. During the last time you had sex (anal or vaginal) did you use condom? U, K:sx8ru                                                                                                              | radio<br><table border="1"> <tr><td>1</td><td>Yes</td></tr> <tr><td>0</td><td>No</td></tr> </table>                                                                                                                                                                                                                                                                                                                                                                                                                                                                                                                               | 1 | Yes        | 0                                       | No         |        |                                                                                                         |   |        |                                                                                                |   |        |                                                                     |   |        |                                                 |
| 1   | Yes                                               |                                                                                                                                                                                                   |                                                                                                                                                                                                                                                                                                                                                                                                                                                                                                                                                                                                                                   |   |            |                                         |            |        |                                                                                                         |   |        |                                                                                                |   |        |                                                                     |   |        |                                                 |
| 0   | No                                                |                                                                                                                                                                                                   |                                                                                                                                                                                                                                                                                                                                                                                                                                                                                                                                                                                                                                   |   |            |                                         |            |        |                                                                                                         |   |        |                                                                                                |   |        |                                                                     |   |        |                                                 |
| 449 | sex_risk_behavior_complete                        | Section Header: <i>Form Status</i><br>Complete?                                                                                                                                                   | dropdown<br><table border="1"> <tr><td>0</td><td>Incomplete</td></tr> <tr><td>1</td><td>Unverified</td></tr> <tr><td>2</td><td>Complete</td></tr> </table>                                                                                                                                                                                                                                                                                                                                                                                                                                                                        | 0 | Incomplete | 1                                       | Unverified | 2      | Complete                                                                                                |   |        |                                                                                                |   |        |                                                                     |   |        |                                                 |
| 0   | Incomplete                                        |                                                                                                                                                                                                   |                                                                                                                                                                                                                                                                                                                                                                                                                                                                                                                                                                                                                                   |   |            |                                         |            |        |                                                                                                         |   |        |                                                                                                |   |        |                                                                     |   |        |                                                 |
| 1   | Unverified                                        |                                                                                                                                                                                                   |                                                                                                                                                                                                                                                                                                                                                                                                                                                                                                                                                                                                                                   |   |            |                                         |            |        |                                                                                                         |   |        |                                                                                                |   |        |                                                                     |   |        |                                                 |
| 2   | Complete                                          |                                                                                                                                                                                                   |                                                                                                                                                                                                                                                                                                                                                                                                                                                                                                                                                                                                                                   |   |            |                                         |            |        |                                                                                                         |   |        |                                                                                                |   |        |                                                                     |   |        |                                                 |

Instrument: **Hiv Comorbidities** (hiv\_comorbidities)

[^ Collapse](#)

|     |                                                        |                                                                                                                                                                              |                                                                                                                                                                                                                                                                                   |   |                                                 |   |                                                        |   |                                                   |
|-----|--------------------------------------------------------|------------------------------------------------------------------------------------------------------------------------------------------------------------------------------|-----------------------------------------------------------------------------------------------------------------------------------------------------------------------------------------------------------------------------------------------------------------------------------|---|-------------------------------------------------|---|--------------------------------------------------------|---|---------------------------------------------------|
| 450 | hv1a                                                   | 1a. Have you ever had an HIV test? U, K:hv1aru, hv1aruf1                                                                                                                     | radio<br><table border="1"> <tr><td>1</td><td>Yes</td></tr> <tr><td>0</td><td>No</td></tr> <tr><td>8</td><td>Refused to Answer</td></tr> </table>                                                                                                                                 | 1 | Yes                                             | 0 | No                                                     | 8 | Refused to Answer                                 |
| 1   | Yes                                                    |                                                                                                                                                                              |                                                                                                                                                                                                                                                                                   |   |                                                 |   |                                                        |   |                                                   |
| 0   | No                                                     |                                                                                                                                                                              |                                                                                                                                                                                                                                                                                   |   |                                                 |   |                                                        |   |                                                   |
| 8   | Refused to Answer                                      |                                                                                                                                                                              |                                                                                                                                                                                                                                                                                   |   |                                                 |   |                                                        |   |                                                   |
| 451 | hv2am                                                  | 2a. When were you last tested for HIV? Month U, K:hv2amru hv2amruf1<br><i>Month</i>                                                                                          | text (integer, Min: 1, Max: 12)                                                                                                                                                                                                                                                   |   |                                                 |   |                                                        |   |                                                   |
| 452 | hv2ay                                                  | 2a. Year U, K:hv1ayru, hv2ayruf1<br><i>Year</i>                                                                                                                              | text (number, Min: 1985, Max: 2020)                                                                                                                                                                                                                                               |   |                                                 |   |                                                        |   |                                                   |
| 453 | hv1                                                    | 1. What was the result of your last HIV test? U, K:hv1ru, hv1ruf1                                                                                                            | radio<br><table border="1"> <tr><td>1</td><td>I was told I was HIV positive (that I have HIV)</td></tr> <tr><td>2</td><td>I was told I was HIV negative (that I do NOT have HIV)</td></tr> <tr><td>3</td><td>I did not go back and get the results of my tests</td></tr> </table> | 1 | I was told I was HIV positive (that I have HIV) | 2 | I was told I was HIV negative (that I do NOT have HIV) | 3 | I did not go back and get the results of my tests |
| 1   | I was told I was HIV positive (that I have HIV)        |                                                                                                                                                                              |                                                                                                                                                                                                                                                                                   |   |                                                 |   |                                                        |   |                                                   |
| 2   | I was told I was HIV negative (that I do NOT have HIV) |                                                                                                                                                                              |                                                                                                                                                                                                                                                                                   |   |                                                 |   |                                                        |   |                                                   |
| 3   | I did not go back and get the results of my tests      |                                                                                                                                                                              |                                                                                                                                                                                                                                                                                   |   |                                                 |   |                                                        |   |                                                   |
| 454 | hv2                                                    | 2. Have you undergone confirmatory testing in a medical institution/department where they drew your blood and confirmed your HIV test using second test? U, K:hv2ru, hv2ruf1 | radio<br><table border="1"> <tr><td>1</td><td>Yes</td></tr> <tr><td>0</td><td>No</td></tr> </table>                                                                                                                                                                               | 1 | Yes                                             | 0 | No                                                     |   |                                                   |
| 1   | Yes                                                    |                                                                                                                                                                              |                                                                                                                                                                                                                                                                                   |   |                                                 |   |                                                        |   |                                                   |
| 0   | No                                                     |                                                                                                                                                                              |                                                                                                                                                                                                                                                                                   |   |                                                 |   |                                                        |   |                                                   |

|     |                                                                   |                                                                                                                                   |                                                                                                                                                                                                                                                                                                                                                                                                                                                       |   |                                     |   |                                                               |   |                                                                   |   |                                               |   |                  |   |   |   |   |   |   |   |   |    |                        |
|-----|-------------------------------------------------------------------|-----------------------------------------------------------------------------------------------------------------------------------|-------------------------------------------------------------------------------------------------------------------------------------------------------------------------------------------------------------------------------------------------------------------------------------------------------------------------------------------------------------------------------------------------------------------------------------------------------|---|-------------------------------------|---|---------------------------------------------------------------|---|-------------------------------------------------------------------|---|-----------------------------------------------|---|------------------|---|---|---|---|---|---|---|---|----|------------------------|
| 455 | hv3                                                               | 3. Did you go back to get the results? U, K: hv3ru, hv3ruf1                                                                       | radio<br><table border="1"> <tr> <td>1</td> <td>Yes</td> </tr> <tr> <td>0</td> <td>No</td> </tr> </table>                                                                                                                                                                                                                                                                                                                                             | 1 | Yes                                 | 0 | No                                                            |   |                                                                   |   |                                               |   |                  |   |   |   |   |   |   |   |   |    |                        |
| 1   | Yes                                                               |                                                                                                                                   |                                                                                                                                                                                                                                                                                                                                                                                                                                                       |   |                                     |   |                                                               |   |                                                                   |   |                                               |   |                  |   |   |   |   |   |   |   |   |    |                        |
| 0   | No                                                                |                                                                                                                                   |                                                                                                                                                                                                                                                                                                                                                                                                                                                       |   |                                     |   |                                                               |   |                                                                   |   |                                               |   |                  |   |   |   |   |   |   |   |   |    |                        |
| 456 | hv4                                                               | 4. Are you a "registered" patient at the AIDS center U, , K: hv4ru, hv4ruf1                                                       | yesno<br><table border="1"> <tr> <td>1</td> <td>Yes</td> </tr> <tr> <td>0</td> <td>No</td> </tr> </table>                                                                                                                                                                                                                                                                                                                                             | 1 | Yes                                 | 0 | No                                                            |   |                                                                   |   |                                               |   |                  |   |   |   |   |   |   |   |   |    |                        |
| 1   | Yes                                                               |                                                                                                                                   |                                                                                                                                                                                                                                                                                                                                                                                                                                                       |   |                                     |   |                                                               |   |                                                                   |   |                                               |   |                  |   |   |   |   |   |   |   |   |    |                        |
| 0   | No                                                                |                                                                                                                                   |                                                                                                                                                                                                                                                                                                                                                                                                                                                       |   |                                     |   |                                                               |   |                                                                   |   |                                               |   |                  |   |   |   |   |   |   |   |   |    |                        |
| 457 | hv5m                                                              | 5. When was the last time you had your CD4 checked? Month U, K: hv5mru, hv5mruf1<br><i>Month</i>                                  | text (integer, Min: 1, Max: 12)                                                                                                                                                                                                                                                                                                                                                                                                                       |   |                                     |   |                                                               |   |                                                                   |   |                                               |   |                  |   |   |   |   |   |   |   |   |    |                        |
| 458 | hv5y                                                              | 5. Year U, K: hv5yru, hv5yruf1<br><i>Year</i>                                                                                     | text (integer, Min: 1985, Max: 2020)                                                                                                                                                                                                                                                                                                                                                                                                                  |   |                                     |   |                                                               |   |                                                                   |   |                                               |   |                  |   |   |   |   |   |   |   |   |    |                        |
| 459 | hv6                                                               | 6. Which of the following responses represents your most recent CD4 count? U, K: hv6ru, hv6ruf1                                   | radio<br><table border="1"> <tr> <td>1</td> <td>I never went back to get my results</td> </tr> <tr> <td>2</td> <td>I went back for the results and was told I need HIV medicines</td> </tr> <tr> <td>3</td> <td>I went back for results and was told I did not need HIV medicines</td> </tr> <tr> <td>4</td> <td>The doctors didn't comment on HIV medications</td> </tr> <tr> <td>5</td> <td>I don't remember</td> </tr> </table>                    | 1 | I never went back to get my results | 2 | I went back for the results and was told I need HIV medicines | 3 | I went back for results and was told I did not need HIV medicines | 4 | The doctors didn't comment on HIV medications | 5 | I don't remember |   |   |   |   |   |   |   |   |    |                        |
| 1   | I never went back to get my results                               |                                                                                                                                   |                                                                                                                                                                                                                                                                                                                                                                                                                                                       |   |                                     |   |                                                               |   |                                                                   |   |                                               |   |                  |   |   |   |   |   |   |   |   |    |                        |
| 2   | I went back for the results and was told I need HIV medicines     |                                                                                                                                   |                                                                                                                                                                                                                                                                                                                                                                                                                                                       |   |                                     |   |                                                               |   |                                                                   |   |                                               |   |                  |   |   |   |   |   |   |   |   |    |                        |
| 3   | I went back for results and was told I did not need HIV medicines |                                                                                                                                   |                                                                                                                                                                                                                                                                                                                                                                                                                                                       |   |                                     |   |                                                               |   |                                                                   |   |                                               |   |                  |   |   |   |   |   |   |   |   |    |                        |
| 4   | The doctors didn't comment on HIV medications                     |                                                                                                                                   |                                                                                                                                                                                                                                                                                                                                                                                                                                                       |   |                                     |   |                                                               |   |                                                                   |   |                                               |   |                  |   |   |   |   |   |   |   |   |    |                        |
| 5   | I don't remember                                                  |                                                                                                                                   |                                                                                                                                                                                                                                                                                                                                                                                                                                                       |   |                                     |   |                                                               |   |                                                                   |   |                                               |   |                  |   |   |   |   |   |   |   |   |    |                        |
| 460 | hv7                                                               | 7. What was the result of your last CD4 count? Approximate if needed. If you do not remember, enter 777. U: hv7ru hv7ruf1, K: N/A | text (number)                                                                                                                                                                                                                                                                                                                                                                                                                                         |   |                                     |   |                                                               |   |                                                                   |   |                                               |   |                  |   |   |   |   |   |   |   |   |    |                        |
| 461 | hv8                                                               | 8. Did you start taking ART medication? U, K: hv8ru, hv8ruf1                                                                      | radio<br><table border="1"> <tr> <td>1</td> <td>Yes</td> </tr> <tr> <td>0</td> <td>No</td> </tr> </table>                                                                                                                                                                                                                                                                                                                                             | 1 | Yes                                 | 0 | No                                                            |   |                                                                   |   |                                               |   |                  |   |   |   |   |   |   |   |   |    |                        |
| 1   | Yes                                                               |                                                                                                                                   |                                                                                                                                                                                                                                                                                                                                                                                                                                                       |   |                                     |   |                                                               |   |                                                                   |   |                                               |   |                  |   |   |   |   |   |   |   |   |    |                        |
| 0   | No                                                                |                                                                                                                                   |                                                                                                                                                                                                                                                                                                                                                                                                                                                       |   |                                     |   |                                                               |   |                                                                   |   |                                               |   |                  |   |   |   |   |   |   |   |   |    |                        |
| 462 | hv8a                                                              | 8a. On a scale of 1-10 , how important is it for you to start HIV medications? U, K: hv8aru, hv8aruf1                             | radio<br><table border="1"> <tr> <td>1</td> <td>1-not important at all</td> </tr> <tr> <td>2</td> <td>2</td> </tr> <tr> <td>3</td> <td>3</td> </tr> <tr> <td>4</td> <td>4</td> </tr> <tr> <td>5</td> <td>5</td> </tr> <tr> <td>6</td> <td>6</td> </tr> <tr> <td>7</td> <td>7</td> </tr> <tr> <td>8</td> <td>8</td> </tr> <tr> <td>9</td> <td>9</td> </tr> <tr> <td>10</td> <td>10-extremely important</td> </tr> </table> <p>Custom alignment: LH</p> | 1 | 1-not important at all              | 2 | 2                                                             | 3 | 3                                                                 | 4 | 4                                             | 5 | 5                | 6 | 6 | 7 | 7 | 8 | 8 | 9 | 9 | 10 | 10-extremely important |
| 1   | 1-not important at all                                            |                                                                                                                                   |                                                                                                                                                                                                                                                                                                                                                                                                                                                       |   |                                     |   |                                                               |   |                                                                   |   |                                               |   |                  |   |   |   |   |   |   |   |   |    |                        |
| 2   | 2                                                                 |                                                                                                                                   |                                                                                                                                                                                                                                                                                                                                                                                                                                                       |   |                                     |   |                                                               |   |                                                                   |   |                                               |   |                  |   |   |   |   |   |   |   |   |    |                        |
| 3   | 3                                                                 |                                                                                                                                   |                                                                                                                                                                                                                                                                                                                                                                                                                                                       |   |                                     |   |                                                               |   |                                                                   |   |                                               |   |                  |   |   |   |   |   |   |   |   |    |                        |
| 4   | 4                                                                 |                                                                                                                                   |                                                                                                                                                                                                                                                                                                                                                                                                                                                       |   |                                     |   |                                                               |   |                                                                   |   |                                               |   |                  |   |   |   |   |   |   |   |   |    |                        |
| 5   | 5                                                                 |                                                                                                                                   |                                                                                                                                                                                                                                                                                                                                                                                                                                                       |   |                                     |   |                                                               |   |                                                                   |   |                                               |   |                  |   |   |   |   |   |   |   |   |    |                        |
| 6   | 6                                                                 |                                                                                                                                   |                                                                                                                                                                                                                                                                                                                                                                                                                                                       |   |                                     |   |                                                               |   |                                                                   |   |                                               |   |                  |   |   |   |   |   |   |   |   |    |                        |
| 7   | 7                                                                 |                                                                                                                                   |                                                                                                                                                                                                                                                                                                                                                                                                                                                       |   |                                     |   |                                                               |   |                                                                   |   |                                               |   |                  |   |   |   |   |   |   |   |   |    |                        |
| 8   | 8                                                                 |                                                                                                                                   |                                                                                                                                                                                                                                                                                                                                                                                                                                                       |   |                                     |   |                                                               |   |                                                                   |   |                                               |   |                  |   |   |   |   |   |   |   |   |    |                        |
| 9   | 9                                                                 |                                                                                                                                   |                                                                                                                                                                                                                                                                                                                                                                                                                                                       |   |                                     |   |                                                               |   |                                                                   |   |                                               |   |                  |   |   |   |   |   |   |   |   |    |                        |
| 10  | 10-extremely important                                            |                                                                                                                                   |                                                                                                                                                                                                                                                                                                                                                                                                                                                       |   |                                     |   |                                                               |   |                                                                   |   |                                               |   |                  |   |   |   |   |   |   |   |   |    |                        |
| 463 | hv9                                                               | 9. Are you currently taking ART medication? U, K: hv9ru, hv9ruf1                                                                  | yesno<br><table border="1"> <tr> <td>1</td> <td>Yes</td> </tr> <tr> <td>0</td> <td>No</td> </tr> </table>                                                                                                                                                                                                                                                                                                                                             | 1 | Yes                                 | 0 | No                                                            |   |                                                                   |   |                                               |   |                  |   |   |   |   |   |   |   |   |    |                        |
| 1   | Yes                                                               |                                                                                                                                   |                                                                                                                                                                                                                                                                                                                                                                                                                                                       |   |                                     |   |                                                               |   |                                                                   |   |                                               |   |                  |   |   |   |   |   |   |   |   |    |                        |
| 0   | No                                                                |                                                                                                                                   |                                                                                                                                                                                                                                                                                                                                                                                                                                                       |   |                                     |   |                                                               |   |                                                                   |   |                                               |   |                  |   |   |   |   |   |   |   |   |    |                        |



|                                                                        |                                                                                       |                                                                                                                                                                                                                                                                                                                                                                                                       |                                                                                                                                                                                                                                                                                                                                                                                                                    |   |                          |   |            |   |          |   |   |   |   |   |   |   |   |   |   |   |   |    |                          |
|------------------------------------------------------------------------|---------------------------------------------------------------------------------------|-------------------------------------------------------------------------------------------------------------------------------------------------------------------------------------------------------------------------------------------------------------------------------------------------------------------------------------------------------------------------------------------------------|--------------------------------------------------------------------------------------------------------------------------------------------------------------------------------------------------------------------------------------------------------------------------------------------------------------------------------------------------------------------------------------------------------------------|---|--------------------------|---|------------|---|----------|---|---|---|---|---|---|---|---|---|---|---|---|----|--------------------------|
| 464                                                                    | hv10                                                                                  | 10 On a scale of 1-10, how confident are you that you can get a doctor to prescribe you HIV medications now? U, K: hv10ru, hv10ruf1                                                                                                                                                                                                                                                                   | <table border="1"> <tr><td>1</td><td>1 - not confident at all</td></tr> <tr><td>2</td><td>2</td></tr> <tr><td>3</td><td>3</td></tr> <tr><td>4</td><td>4</td></tr> <tr><td>5</td><td>5</td></tr> <tr><td>6</td><td>6</td></tr> <tr><td>7</td><td>7</td></tr> <tr><td>8</td><td>8</td></tr> <tr><td>9</td><td>9</td></tr> <tr><td>10</td><td>10 - extremely confident</td></tr> </table> <p>Custom alignment: LH</p> | 1 | 1 - not confident at all | 2 | 2          | 3 | 3        | 4 | 4 | 5 | 5 | 6 | 6 | 7 | 7 | 8 | 8 | 9 | 9 | 10 | 10 - extremely confident |
| 1                                                                      | 1 - not confident at all                                                              |                                                                                                                                                                                                                                                                                                                                                                                                       |                                                                                                                                                                                                                                                                                                                                                                                                                    |   |                          |   |            |   |          |   |   |   |   |   |   |   |   |   |   |   |   |    |                          |
| 2                                                                      | 2                                                                                     |                                                                                                                                                                                                                                                                                                                                                                                                       |                                                                                                                                                                                                                                                                                                                                                                                                                    |   |                          |   |            |   |          |   |   |   |   |   |   |   |   |   |   |   |   |    |                          |
| 3                                                                      | 3                                                                                     |                                                                                                                                                                                                                                                                                                                                                                                                       |                                                                                                                                                                                                                                                                                                                                                                                                                    |   |                          |   |            |   |          |   |   |   |   |   |   |   |   |   |   |   |   |    |                          |
| 4                                                                      | 4                                                                                     |                                                                                                                                                                                                                                                                                                                                                                                                       |                                                                                                                                                                                                                                                                                                                                                                                                                    |   |                          |   |            |   |          |   |   |   |   |   |   |   |   |   |   |   |   |    |                          |
| 5                                                                      | 5                                                                                     |                                                                                                                                                                                                                                                                                                                                                                                                       |                                                                                                                                                                                                                                                                                                                                                                                                                    |   |                          |   |            |   |          |   |   |   |   |   |   |   |   |   |   |   |   |    |                          |
| 6                                                                      | 6                                                                                     |                                                                                                                                                                                                                                                                                                                                                                                                       |                                                                                                                                                                                                                                                                                                                                                                                                                    |   |                          |   |            |   |          |   |   |   |   |   |   |   |   |   |   |   |   |    |                          |
| 7                                                                      | 7                                                                                     |                                                                                                                                                                                                                                                                                                                                                                                                       |                                                                                                                                                                                                                                                                                                                                                                                                                    |   |                          |   |            |   |          |   |   |   |   |   |   |   |   |   |   |   |   |    |                          |
| 8                                                                      | 8                                                                                     |                                                                                                                                                                                                                                                                                                                                                                                                       |                                                                                                                                                                                                                                                                                                                                                                                                                    |   |                          |   |            |   |          |   |   |   |   |   |   |   |   |   |   |   |   |    |                          |
| 9                                                                      | 9                                                                                     |                                                                                                                                                                                                                                                                                                                                                                                                       |                                                                                                                                                                                                                                                                                                                                                                                                                    |   |                          |   |            |   |          |   |   |   |   |   |   |   |   |   |   |   |   |    |                          |
| 10                                                                     | 10 - extremely confident                                                              |                                                                                                                                                                                                                                                                                                                                                                                                       |                                                                                                                                                                                                                                                                                                                                                                                                                    |   |                          |   |            |   |          |   |   |   |   |   |   |   |   |   |   |   |   |    |                          |
| 465                                                                    | hv11                                                                                  | 11. It is often difficult to remember to take all of your medications exactly as prescribed by your doctor. Please, use the following sliding scale and place the mark approximately with how you believe that you have been able to take the medications over the past 30 days. (0% means you missed all prescribed doses, 100% means you NEVER missed a dose). (movable bar) U, K: hv11ru, hv11ruf1 | <p>slider</p> <p>Slider labels: 0%-None of the time, 50%-About half the time, 100% All of the time</p> <p>Custom alignment: RV</p>                                                                                                                                                                                                                                                                                 |   |                          |   |            |   |          |   |   |   |   |   |   |   |   |   |   |   |   |    |                          |
| 466                                                                    | hiv_comorbidities_complete                                                            | Section Header: <i>Form Status</i><br>Complete?                                                                                                                                                                                                                                                                                                                                                       | <p>dropdown</p> <table border="1"> <tr><td>0</td><td>Incomplete</td></tr> <tr><td>1</td><td>Unverified</td></tr> <tr><td>2</td><td>Complete</td></tr> </table>                                                                                                                                                                                                                                                     | 0 | Incomplete               | 1 | Unverified | 2 | Complete |   |   |   |   |   |   |   |   |   |   |   |   |    |                          |
| 0                                                                      | Incomplete                                                                            |                                                                                                                                                                                                                                                                                                                                                                                                       |                                                                                                                                                                                                                                                                                                                                                                                                                    |   |                          |   |            |   |          |   |   |   |   |   |   |   |   |   |   |   |   |    |                          |
| 1                                                                      | Unverified                                                                            |                                                                                                                                                                                                                                                                                                                                                                                                       |                                                                                                                                                                                                                                                                                                                                                                                                                    |   |                          |   |            |   |          |   |   |   |   |   |   |   |   |   |   |   |   |    |                          |
| 2                                                                      | Complete                                                                              |                                                                                                                                                                                                                                                                                                                                                                                                       |                                                                                                                                                                                                                                                                                                                                                                                                                    |   |                          |   |            |   |          |   |   |   |   |   |   |   |   |   |   |   |   |    |                          |
| Instrument: <b>HIV Comorbidities Part 2</b> (hiv_comorbidities_part_2) |                                                                                       |                                                                                                                                                                                                                                                                                                                                                                                                       | <a href="#">^ Collapse</a>                                                                                                                                                                                                                                                                                                                                                                                         |   |                          |   |            |   |          |   |   |   |   |   |   |   |   |   |   |   |   |    |                          |
| 467                                                                    | cd6label                                                                              | The next series of questions are going to ask you about different aspects of your health. This information will be used only by the research team. Please be as honest as possible                                                                                                                                                                                                                    | descriptive                                                                                                                                                                                                                                                                                                                                                                                                        |   |                          |   |            |   |          |   |   |   |   |   |   |   |   |   |   |   |   |    |                          |
| 468                                                                    | cd6a<br>Show the field ONLY if:<br>[event] = '1' or [event] = '2'                     | 6a. Have you ever been told by a medical professional that you have tuberculosis? U, K: cd6aru                                                                                                                                                                                                                                                                                                        | <p>yesno</p> <table border="1"> <tr><td>1</td><td>Yes</td></tr> <tr><td>0</td><td>No</td></tr> </table>                                                                                                                                                                                                                                                                                                            | 1 | Yes                      | 0 | No         |   |          |   |   |   |   |   |   |   |   |   |   |   |   |    |                          |
| 1                                                                      | Yes                                                                                   |                                                                                                                                                                                                                                                                                                                                                                                                       |                                                                                                                                                                                                                                                                                                                                                                                                                    |   |                          |   |            |   |          |   |   |   |   |   |   |   |   |   |   |   |   |    |                          |
| 0                                                                      | No                                                                                    |                                                                                                                                                                                                                                                                                                                                                                                                       |                                                                                                                                                                                                                                                                                                                                                                                                                    |   |                          |   |            |   |          |   |   |   |   |   |   |   |   |   |   |   |   |    |                          |
| 469                                                                    | cd6a_2<br>Show the field ONLY if:<br>[event] = '3' or [event] = '4' or [event] = '5'  | 6a. In the last 30 days have you been told by a medical professional that you have tuberculosis? U, K: cd6aruf1                                                                                                                                                                                                                                                                                       | <p>yesno</p> <table border="1"> <tr><td>1</td><td>Yes</td></tr> <tr><td>0</td><td>No</td></tr> </table>                                                                                                                                                                                                                                                                                                            | 1 | Yes                      | 0 | No         |   |          |   |   |   |   |   |   |   |   |   |   |   |   |    |                          |
| 1                                                                      | Yes                                                                                   |                                                                                                                                                                                                                                                                                                                                                                                                       |                                                                                                                                                                                                                                                                                                                                                                                                                    |   |                          |   |            |   |          |   |   |   |   |   |   |   |   |   |   |   |   |    |                          |
| 0                                                                      | No                                                                                    |                                                                                                                                                                                                                                                                                                                                                                                                       |                                                                                                                                                                                                                                                                                                                                                                                                                    |   |                          |   |            |   |          |   |   |   |   |   |   |   |   |   |   |   |   |    |                          |
| 470                                                                    | cd6bm<br>Show the field ONLY if:<br>[cd6a] = '1' or [cd6a_2] = '1'                    | 6b. When were you told you had tuberculosis? Month U, K: cd6bmru, cd6bmruf1<br><i>MM</i>                                                                                                                                                                                                                                                                                                              | text (integer, Min: 1, Max: 12)                                                                                                                                                                                                                                                                                                                                                                                    |   |                          |   |            |   |          |   |   |   |   |   |   |   |   |   |   |   |   |    |                          |
| 471                                                                    | cd6by<br>Show the field ONLY if:<br>[cd6a] = '1' or [cd6a_2] = '1'                    | 6b. Year U, K: cd6byru, cd6byruf1<br><i>YYYY</i>                                                                                                                                                                                                                                                                                                                                                      | text (integer, Min: 1917, Max: 2020)                                                                                                                                                                                                                                                                                                                                                                               |   |                          |   |            |   |          |   |   |   |   |   |   |   |   |   |   |   |   |    |                          |
| 472                                                                    | cd6c<br>Show the field ONLY if:<br>[cd6a] = '1' or [cd6a_2] = '1'                     | CD6c. Did you receive treatment? U, K: cd6cru, cd6cruf1                                                                                                                                                                                                                                                                                                                                               | <p>yesno</p> <table border="1"> <tr><td>1</td><td>Yes</td></tr> <tr><td>0</td><td>No</td></tr> </table>                                                                                                                                                                                                                                                                                                            | 1 | Yes                      | 0 | No         |   |          |   |   |   |   |   |   |   |   |   |   |   |   |    |                          |
| 1                                                                      | Yes                                                                                   |                                                                                                                                                                                                                                                                                                                                                                                                       |                                                                                                                                                                                                                                                                                                                                                                                                                    |   |                          |   |            |   |          |   |   |   |   |   |   |   |   |   |   |   |   |    |                          |
| 0                                                                      | No                                                                                    |                                                                                                                                                                                                                                                                                                                                                                                                       |                                                                                                                                                                                                                                                                                                                                                                                                                    |   |                          |   |            |   |          |   |   |   |   |   |   |   |   |   |   |   |   |    |                          |
| 473                                                                    | cd10a<br>Show the field ONLY if:<br>[event] = '1' or [event] = '2'                    | 10a. Have you ever been told by a medical professional that you have syphilis? U, K: cd10aru                                                                                                                                                                                                                                                                                                          | <p>yesno</p> <table border="1"> <tr><td>1</td><td>Yes</td></tr> <tr><td>0</td><td>No</td></tr> </table>                                                                                                                                                                                                                                                                                                            | 1 | Yes                      | 0 | No         |   |          |   |   |   |   |   |   |   |   |   |   |   |   |    |                          |
| 1                                                                      | Yes                                                                                   |                                                                                                                                                                                                                                                                                                                                                                                                       |                                                                                                                                                                                                                                                                                                                                                                                                                    |   |                          |   |            |   |          |   |   |   |   |   |   |   |   |   |   |   |   |    |                          |
| 0                                                                      | No                                                                                    |                                                                                                                                                                                                                                                                                                                                                                                                       |                                                                                                                                                                                                                                                                                                                                                                                                                    |   |                          |   |            |   |          |   |   |   |   |   |   |   |   |   |   |   |   |    |                          |
| 474                                                                    | cd10a_2<br>Show the field ONLY if:<br>[event] = '3' or [event] = '4' or [event] = '5' | 10a. In the last 30 days have you been told by a medical professional that you have syphilis? U, K: cd10aruf1                                                                                                                                                                                                                                                                                         | <p>yesno</p> <table border="1"> <tr><td>1</td><td>Yes</td></tr> <tr><td>0</td><td>No</td></tr> </table>                                                                                                                                                                                                                                                                                                            | 1 | Yes                      | 0 | No         |   |          |   |   |   |   |   |   |   |   |   |   |   |   |    |                          |
| 1                                                                      | Yes                                                                                   |                                                                                                                                                                                                                                                                                                                                                                                                       |                                                                                                                                                                                                                                                                                                                                                                                                                    |   |                          |   |            |   |          |   |   |   |   |   |   |   |   |   |   |   |   |    |                          |
| 0                                                                      | No                                                                                    |                                                                                                                                                                                                                                                                                                                                                                                                       |                                                                                                                                                                                                                                                                                                                                                                                                                    |   |                          |   |            |   |          |   |   |   |   |   |   |   |   |   |   |   |   |    |                          |

|     |                                                                       |                                                                                                                                           |                                                        |
|-----|-----------------------------------------------------------------------|-------------------------------------------------------------------------------------------------------------------------------------------|--------------------------------------------------------|
| 475 | cd10bm<br>Show the field ONLY if:<br>[cd10a] = '1' or [cd10a_2] = '1' | 10b. When were you told you had syphilis? Month U, K:<br>cd10bmr<br>MM                                                                    | text (integer, Min: 1, Max: 12)                        |
| 476 | cd10by<br>Show the field ONLY if:<br>[cd10a] = '1' or [cd10a_2] = '1' | 10b. Year U, K:cd10byru<br>YYYY                                                                                                           | text (integer, Min: 1917, Max: 2020)                   |
| 477 | cd10c<br>Show the field ONLY if:<br>[cd10a] = '1' or [cd10a_2] = '1'  | 10c. Did you receive treatment? U, K:cd10cru                                                                                              | yesno<br>1 Yes<br>0 No                                 |
| 478 | cd11a<br>Show the field ONLY if:<br>[event] = '1' or [event] = '2'    | 11a. Have you ever been told by a medical professional that you have other sexually transmitted infections? U, K: cd11aru                 | yesno<br>1 Yes<br>0 No                                 |
| 479 | cd11a_2                                                               | 11a. In the last 30 days have you been told by a medical professional that you have other sexually transmitted infections?U, K: cd11aruf1 | yesno<br>1 Yes<br>0 No                                 |
| 480 | cd11b<br>Show the field ONLY if:<br>[cd11a] = '1' or [cd11a_2] = '1'  | 11b. Please, specify the other sexually transmitted infections U, K: cd11bru, cd11bruf1                                                   | notes                                                  |
| 481 | cd11cm<br>Show the field ONLY if:<br>[cd11a] = '1' or [cd11a_2] = '1' | 11c. When was the last time you had this STI? Month U, K:<br>cd11cmru, cd11cmruf1<br>MM                                                   | text (integer, Min: 1, Max: 12)                        |
| 482 | cd11cy<br>Show the field ONLY if:<br>[cd11a] = '1' or [cd11a_2] = '1' | 11c. Year U, K: cd11cyru, cd11cyruf1 M: cd11cyru,<br>cd11com<br>YYYY                                                                      | text (number, Min: 1917, Max: 2020)                    |
| 483 | cd11d<br>Show the field ONLY if:<br>[cd11a] = '1' or [cd11a_2] = '1'  | CD11d. Did you get treatment for this STI? U, K: cd11dru,<br>cd11druf1                                                                    | yesno<br>1 Yes<br>0 No                                 |
| 484 | hiv_comorbidities_part_2_complete                                     | Section Header: <i>Form Status</i><br>Complete?                                                                                           | dropdown<br>0 Incomplete<br>1 Unverified<br>2 Complete |

Instrument: **Detention History** (detention\_history)[^ Collapse](#)

|     |                                                 |                                                                                                                                                                                                                                                                                |                                |
|-----|-------------------------------------------------|--------------------------------------------------------------------------------------------------------------------------------------------------------------------------------------------------------------------------------------------------------------------------------|--------------------------------|
| 485 | dh11                                            | DH11. In the last year, approximately how many times had you been UNOFFICIALLY detained by the police? Enter "0" times if you had not been officially detained.(Note: an official detention is any detention where formal charges are brought against you). U, K:dh11ru        | text (number, Min: 0, Max: 20) |
| 486 | dh11b<br>Show the field ONLY if:<br>[dh11] >= 1 | DH11b. During the [dh11] UNOFFICIAL detentions by the police in the last year, how many times did you experience any symptoms of abstinence syndrome?U , K:dh11bru1<br>time(s)                                                                                                 | text (number, Min: 0, Max: 20) |
| 487 | dh11d<br>Show the field ONLY if:<br>[dh11] >= 1 | DH11d. During the [Response to DH11] UNOFFICIAL detentions by the police in the last year, how many times were HIV medications interrupted for more than 24 hours? If you were not taking HIV medication in the year before incarceration, select "Not Applicable". U:dh11dru1 | text (number, Min: 0, Max: 20) |
| 488 | dh11f<br>Show the field ONLY if:<br>[dh11] >= 1 | DH11f. During any of the [dh11] UNOFFICIAL detentions by the police in the last year, how many times was methadone interrupted for more than 24 hours? U, K:dh11fru1                                                                                                           | text (number, Min: 0, Max: 20) |
| 489 | dh11h<br>Show the field ONLY if:<br>[dh11] >= 1 | DH11h. During any of the [dh11] UNOFFICIAL detentions by the police in the last year, how many times was your drug use, access to HIV or TB medications or access to substitution therapy used to extract a confession? U, K:dh11hru                                           | text (number, Min: 0, Max: 20) |

|     |                                                |                                                                                                                                                                                                                                                                               |                                                                                                                                                                                                                          |   |            |   |            |   |                  |   |                |
|-----|------------------------------------------------|-------------------------------------------------------------------------------------------------------------------------------------------------------------------------------------------------------------------------------------------------------------------------------|--------------------------------------------------------------------------------------------------------------------------------------------------------------------------------------------------------------------------|---|------------|---|------------|---|------------------|---|----------------|
| 490 | dh11k1<br>Show the field ONLY if: [dh11] >= 1  | DH11k1. During the [Response to DH11] UNOFFICIAL detention(s) in the last year, were you able to see a medical provider if you needed to? If you did not need to, select "Not Applicable". U, K:dh11k1ru1                                                                     | radio<br><table border="1"> <tr><td>1</td><td>Yes</td></tr> <tr><td>0</td><td>No</td></tr> <tr><td>8</td><td>Refuse to Answer</td></tr> <tr><td>9</td><td>Not Applicable</td></tr> </table>                              | 1 | Yes        | 0 | No         | 8 | Refuse to Answer | 9 | Not Applicable |
| 1   | Yes                                            |                                                                                                                                                                                                                                                                               |                                                                                                                                                                                                                          |   |            |   |            |   |                  |   |                |
| 0   | No                                             |                                                                                                                                                                                                                                                                               |                                                                                                                                                                                                                          |   |            |   |            |   |                  |   |                |
| 8   | Refuse to Answer                               |                                                                                                                                                                                                                                                                               |                                                                                                                                                                                                                          |   |            |   |            |   |                  |   |                |
| 9   | Not Applicable                                 |                                                                                                                                                                                                                                                                               |                                                                                                                                                                                                                          |   |            |   |            |   |                  |   |                |
| 491 | dh11a                                          | DH11a. In the last year, approximately how many times had you been OFFICIALLY detained by the police? Enter "0" times if you had not been officially detained. (Note: an official detention is any detention where formal charges are brought against you). U, K:dh11aru      | text (number, Min: 0, Max: 20)                                                                                                                                                                                           |   |            |   |            |   |                  |   |                |
| 492 | dh11c<br>Show the field ONLY if: [dh11a] >= 1  | DH11c. During any of the [dh11a] OFFICIAL detentions by the police in the last year, how many times did you experience any symptoms of abstinence syndrome? U:dh11cru1<br><i>time(s)</i>                                                                                      | text (number, Min: 0, Max: 20)                                                                                                                                                                                           |   |            |   |            |   |                  |   |                |
| 493 | dh11e<br>Show the field ONLY if: [dh11a] >= 1  | DH11e. During the [Response to DH11a] OFFICIAL detentions by the police in the last year, how many times were HIV medications interrupted for more than 24 hours? If you were not taking HIV medication in the year before incarceration, select "Not Applicable". U:dh11eru1 | text (number, Min: 0, Max: 20)                                                                                                                                                                                           |   |            |   |            |   |                  |   |                |
| 494 | dh11g<br>Show the field ONLY if: [dh11a] >= 1  | DH11g. During any of the [Response to DH11a] OFFICIAL detentions by the police in the last year, how many times was methadone interrupted for more than 24 hours? If you were not taking methadone in the year before incarceration, select "Not Applicable". U, K:dh11gru    | text (number, Min: 0, Max: 20)                                                                                                                                                                                           |   |            |   |            |   |                  |   |                |
| 495 | dh11i<br>Show the field ONLY if: [dh11a] >= 1  | DH11i. During any of the [dh11a] OFFICIAL detentions by the police in the last year, how many times was your drug use, access to HIV or TB medications or access to substitution therapy used to extract a confession? U, K:dh11iru                                           | text (number, Min: 0, Max: 20)                                                                                                                                                                                           |   |            |   |            |   |                  |   |                |
| 496 | dh11k2<br>Show the field ONLY if: [dh11a] >= 1 | DH11k2. During the [dh11a] OFFICIAL detention(s) in the last year, were you able to see a medical provider if you needed to? U, K: DH11k2ru                                                                                                                                   | radio<br><table border="1"> <tr><td>1</td><td>Yes</td></tr> <tr><td>0</td><td>No</td></tr> <tr><td>8</td><td>Refuse to Answer</td></tr> <tr><td>9</td><td>Not Applicable</td></tr> </table><br>Field Annotation: @HIDDEN | 1 | Yes        | 0 | No         | 8 | Refuse to Answer | 9 | Not Applicable |
| 1   | Yes                                            |                                                                                                                                                                                                                                                                               |                                                                                                                                                                                                                          |   |            |   |            |   |                  |   |                |
| 0   | No                                             |                                                                                                                                                                                                                                                                               |                                                                                                                                                                                                                          |   |            |   |            |   |                  |   |                |
| 8   | Refuse to Answer                               |                                                                                                                                                                                                                                                                               |                                                                                                                                                                                                                          |   |            |   |            |   |                  |   |                |
| 9   | Not Applicable                                 |                                                                                                                                                                                                                                                                               |                                                                                                                                                                                                                          |   |            |   |            |   |                  |   |                |
| 497 | dh11j                                          | DH11j. How many times were you stopped by the police and searched, held, or arrested as you traveled to or from a needle exchange site in the last year? K: dh11jru                                                                                                           | text (number, Min: 0, Max: 20)<br>Field Annotation: @HIDDEN                                                                                                                                                              |   |            |   |            |   |                  |   |                |
| 498 | detention_history_complete                     | Section Header: <i>Form Status</i><br>Complete?                                                                                                                                                                                                                               | dropdown<br><table border="1"> <tr><td>0</td><td>Incomplete</td></tr> <tr><td>1</td><td>Unverified</td></tr> <tr><td>2</td><td>Complete</td></tr> </table>                                                               | 0 | Incomplete | 1 | Unverified | 2 | Complete         |   |                |
| 0   | Incomplete                                     |                                                                                                                                                                                                                                                                               |                                                                                                                                                                                                                          |   |            |   |            |   |                  |   |                |
| 1   | Unverified                                     |                                                                                                                                                                                                                                                                               |                                                                                                                                                                                                                          |   |            |   |            |   |                  |   |                |
| 2   | Complete                                       |                                                                                                                                                                                                                                                                               |                                                                                                                                                                                                                          |   |            |   |            |   |                  |   |                |

Instrument: **Social Support** (social\_support)

[^ Collapse](#)

|     |          |                                                                                                                                                                                                                                                                                                                                                                                                                                                                                                                                                                                            |             |
|-----|----------|--------------------------------------------------------------------------------------------------------------------------------------------------------------------------------------------------------------------------------------------------------------------------------------------------------------------------------------------------------------------------------------------------------------------------------------------------------------------------------------------------------------------------------------------------------------------------------------------|-------------|
| 499 | sslablel | <p>For the next set of statements, please give information on your social support. People sometimes look to others for companionship, assistance, or other types of support. Please answer using the following scale: [None of the time, A little of the time, Some of the time, Most of the time, All of the time].</p> <p>How often is each of the following kinds of support available to you if you need it?</p> <p><i>Interviewer: If the person says they didn't need it, ask "So you would say so none of the time or a little of the time?" and mark appropriate response.</i></p> | descriptive |
|-----|----------|--------------------------------------------------------------------------------------------------------------------------------------------------------------------------------------------------------------------------------------------------------------------------------------------------------------------------------------------------------------------------------------------------------------------------------------------------------------------------------------------------------------------------------------------------------------------------------------------|-------------|

|     |                      |                                                                               |                                                                                                                                                                                                                                                                                   |   |                  |   |                      |   |                  |   |                  |   |                 |
|-----|----------------------|-------------------------------------------------------------------------------|-----------------------------------------------------------------------------------------------------------------------------------------------------------------------------------------------------------------------------------------------------------------------------------|---|------------------|---|----------------------|---|------------------|---|------------------|---|-----------------|
| 500 | ss1                  | Someone to help if you were confined to bed U, K:ss1ru                        | radio (Matrix)<br><table border="1"> <tr><td>1</td><td>None of the time</td></tr> <tr><td>2</td><td>A little of the time</td></tr> <tr><td>3</td><td>Some of the time</td></tr> <tr><td>4</td><td>Most of the time</td></tr> <tr><td>5</td><td>All of the time</td></tr> </table> | 1 | None of the time | 2 | A little of the time | 3 | Some of the time | 4 | Most of the time | 5 | All of the time |
| 1   | None of the time     |                                                                               |                                                                                                                                                                                                                                                                                   |   |                  |   |                      |   |                  |   |                  |   |                 |
| 2   | A little of the time |                                                                               |                                                                                                                                                                                                                                                                                   |   |                  |   |                      |   |                  |   |                  |   |                 |
| 3   | Some of the time     |                                                                               |                                                                                                                                                                                                                                                                                   |   |                  |   |                      |   |                  |   |                  |   |                 |
| 4   | Most of the time     |                                                                               |                                                                                                                                                                                                                                                                                   |   |                  |   |                      |   |                  |   |                  |   |                 |
| 5   | All of the time      |                                                                               |                                                                                                                                                                                                                                                                                   |   |                  |   |                      |   |                  |   |                  |   |                 |
| 501 | ss2                  | Someone you can count on to listen to you when you talk U, K:ss2ru            | radio (Matrix)<br><table border="1"> <tr><td>1</td><td>None of the time</td></tr> <tr><td>2</td><td>A little of the time</td></tr> <tr><td>3</td><td>Some of the time</td></tr> <tr><td>4</td><td>Most of the time</td></tr> <tr><td>5</td><td>All of the time</td></tr> </table> | 1 | None of the time | 2 | A little of the time | 3 | Some of the time | 4 | Most of the time | 5 | All of the time |
| 1   | None of the time     |                                                                               |                                                                                                                                                                                                                                                                                   |   |                  |   |                      |   |                  |   |                  |   |                 |
| 2   | A little of the time |                                                                               |                                                                                                                                                                                                                                                                                   |   |                  |   |                      |   |                  |   |                  |   |                 |
| 3   | Some of the time     |                                                                               |                                                                                                                                                                                                                                                                                   |   |                  |   |                      |   |                  |   |                  |   |                 |
| 4   | Most of the time     |                                                                               |                                                                                                                                                                                                                                                                                   |   |                  |   |                      |   |                  |   |                  |   |                 |
| 5   | All of the time      |                                                                               |                                                                                                                                                                                                                                                                                   |   |                  |   |                      |   |                  |   |                  |   |                 |
| 502 | ss3                  | Someone to give you advice about a crisis U, K:ss3ru                          | radio (Matrix)<br><table border="1"> <tr><td>1</td><td>None of the time</td></tr> <tr><td>2</td><td>A little of the time</td></tr> <tr><td>3</td><td>Some of the time</td></tr> <tr><td>4</td><td>Most of the time</td></tr> <tr><td>5</td><td>All of the time</td></tr> </table> | 1 | None of the time | 2 | A little of the time | 3 | Some of the time | 4 | Most of the time | 5 | All of the time |
| 1   | None of the time     |                                                                               |                                                                                                                                                                                                                                                                                   |   |                  |   |                      |   |                  |   |                  |   |                 |
| 2   | A little of the time |                                                                               |                                                                                                                                                                                                                                                                                   |   |                  |   |                      |   |                  |   |                  |   |                 |
| 3   | Some of the time     |                                                                               |                                                                                                                                                                                                                                                                                   |   |                  |   |                      |   |                  |   |                  |   |                 |
| 4   | Most of the time     |                                                                               |                                                                                                                                                                                                                                                                                   |   |                  |   |                      |   |                  |   |                  |   |                 |
| 5   | All of the time      |                                                                               |                                                                                                                                                                                                                                                                                   |   |                  |   |                      |   |                  |   |                  |   |                 |
| 503 | ss4                  | Someone to take you to the doctor if you needed it U, K:ss4ru                 | radio (Matrix)<br><table border="1"> <tr><td>1</td><td>None of the time</td></tr> <tr><td>2</td><td>A little of the time</td></tr> <tr><td>3</td><td>Some of the time</td></tr> <tr><td>4</td><td>Most of the time</td></tr> <tr><td>5</td><td>All of the time</td></tr> </table> | 1 | None of the time | 2 | A little of the time | 3 | Some of the time | 4 | Most of the time | 5 | All of the time |
| 1   | None of the time     |                                                                               |                                                                                                                                                                                                                                                                                   |   |                  |   |                      |   |                  |   |                  |   |                 |
| 2   | A little of the time |                                                                               |                                                                                                                                                                                                                                                                                   |   |                  |   |                      |   |                  |   |                  |   |                 |
| 3   | Some of the time     |                                                                               |                                                                                                                                                                                                                                                                                   |   |                  |   |                      |   |                  |   |                  |   |                 |
| 4   | Most of the time     |                                                                               |                                                                                                                                                                                                                                                                                   |   |                  |   |                      |   |                  |   |                  |   |                 |
| 5   | All of the time      |                                                                               |                                                                                                                                                                                                                                                                                   |   |                  |   |                      |   |                  |   |                  |   |                 |
| 504 | ss5                  | Someone who shows you love and affection U, K:ss5ru                           | radio (Matrix)<br><table border="1"> <tr><td>1</td><td>None of the time</td></tr> <tr><td>2</td><td>A little of the time</td></tr> <tr><td>3</td><td>Some of the time</td></tr> <tr><td>4</td><td>Most of the time</td></tr> <tr><td>5</td><td>All of the time</td></tr> </table> | 1 | None of the time | 2 | A little of the time | 3 | Some of the time | 4 | Most of the time | 5 | All of the time |
| 1   | None of the time     |                                                                               |                                                                                                                                                                                                                                                                                   |   |                  |   |                      |   |                  |   |                  |   |                 |
| 2   | A little of the time |                                                                               |                                                                                                                                                                                                                                                                                   |   |                  |   |                      |   |                  |   |                  |   |                 |
| 3   | Some of the time     |                                                                               |                                                                                                                                                                                                                                                                                   |   |                  |   |                      |   |                  |   |                  |   |                 |
| 4   | Most of the time     |                                                                               |                                                                                                                                                                                                                                                                                   |   |                  |   |                      |   |                  |   |                  |   |                 |
| 5   | All of the time      |                                                                               |                                                                                                                                                                                                                                                                                   |   |                  |   |                      |   |                  |   |                  |   |                 |
| 505 | ss6                  | Someone to have a good time with U, K:ss6ru                                   | radio (Matrix)<br><table border="1"> <tr><td>1</td><td>None of the time</td></tr> <tr><td>2</td><td>A little of the time</td></tr> <tr><td>3</td><td>Some of the time</td></tr> <tr><td>4</td><td>Most of the time</td></tr> <tr><td>5</td><td>All of the time</td></tr> </table> | 1 | None of the time | 2 | A little of the time | 3 | Some of the time | 4 | Most of the time | 5 | All of the time |
| 1   | None of the time     |                                                                               |                                                                                                                                                                                                                                                                                   |   |                  |   |                      |   |                  |   |                  |   |                 |
| 2   | A little of the time |                                                                               |                                                                                                                                                                                                                                                                                   |   |                  |   |                      |   |                  |   |                  |   |                 |
| 3   | Some of the time     |                                                                               |                                                                                                                                                                                                                                                                                   |   |                  |   |                      |   |                  |   |                  |   |                 |
| 4   | Most of the time     |                                                                               |                                                                                                                                                                                                                                                                                   |   |                  |   |                      |   |                  |   |                  |   |                 |
| 5   | All of the time      |                                                                               |                                                                                                                                                                                                                                                                                   |   |                  |   |                      |   |                  |   |                  |   |                 |
| 506 | ss7                  | Someone to give you information to help you understand a situation U, K:ss7ru | radio (Matrix)<br><table border="1"> <tr><td>1</td><td>None of the time</td></tr> <tr><td>2</td><td>A little of the time</td></tr> <tr><td>3</td><td>Some of the time</td></tr> <tr><td>4</td><td>Most of the time</td></tr> <tr><td>5</td><td>All of the time</td></tr> </table> | 1 | None of the time | 2 | A little of the time | 3 | Some of the time | 4 | Most of the time | 5 | All of the time |
| 1   | None of the time     |                                                                               |                                                                                                                                                                                                                                                                                   |   |                  |   |                      |   |                  |   |                  |   |                 |
| 2   | A little of the time |                                                                               |                                                                                                                                                                                                                                                                                   |   |                  |   |                      |   |                  |   |                  |   |                 |
| 3   | Some of the time     |                                                                               |                                                                                                                                                                                                                                                                                   |   |                  |   |                      |   |                  |   |                  |   |                 |
| 4   | Most of the time     |                                                                               |                                                                                                                                                                                                                                                                                   |   |                  |   |                      |   |                  |   |                  |   |                 |
| 5   | All of the time      |                                                                               |                                                                                                                                                                                                                                                                                   |   |                  |   |                      |   |                  |   |                  |   |                 |
| 507 | ss8                  | Someone to confide in or talk to about yourself or your problems U, K:ss8ru   | radio (Matrix)<br><table border="1"> <tr><td>1</td><td>None of the time</td></tr> <tr><td>2</td><td>A little of the time</td></tr> <tr><td>3</td><td>Some of the time</td></tr> <tr><td>4</td><td>Most of the time</td></tr> <tr><td>5</td><td>All of the time</td></tr> </table> | 1 | None of the time | 2 | A little of the time | 3 | Some of the time | 4 | Most of the time | 5 | All of the time |
| 1   | None of the time     |                                                                               |                                                                                                                                                                                                                                                                                   |   |                  |   |                      |   |                  |   |                  |   |                 |
| 2   | A little of the time |                                                                               |                                                                                                                                                                                                                                                                                   |   |                  |   |                      |   |                  |   |                  |   |                 |
| 3   | Some of the time     |                                                                               |                                                                                                                                                                                                                                                                                   |   |                  |   |                      |   |                  |   |                  |   |                 |
| 4   | Most of the time     |                                                                               |                                                                                                                                                                                                                                                                                   |   |                  |   |                      |   |                  |   |                  |   |                 |
| 5   | All of the time      |                                                                               |                                                                                                                                                                                                                                                                                   |   |                  |   |                      |   |                  |   |                  |   |                 |

|     |                      |                                                                                         |                                                                                                                                                                                                                                                                                   |   |                  |   |                      |   |                  |   |                  |   |                 |
|-----|----------------------|-----------------------------------------------------------------------------------------|-----------------------------------------------------------------------------------------------------------------------------------------------------------------------------------------------------------------------------------------------------------------------------------|---|------------------|---|----------------------|---|------------------|---|------------------|---|-----------------|
| 508 | ss9                  | Someone who hugs you U, K:ss9ru                                                         | radio (Matrix)<br><table border="1"> <tr><td>1</td><td>None of the time</td></tr> <tr><td>2</td><td>A little of the time</td></tr> <tr><td>3</td><td>Some of the time</td></tr> <tr><td>4</td><td>Most of the time</td></tr> <tr><td>5</td><td>All of the time</td></tr> </table> | 1 | None of the time | 2 | A little of the time | 3 | Some of the time | 4 | Most of the time | 5 | All of the time |
| 1   | None of the time     |                                                                                         |                                                                                                                                                                                                                                                                                   |   |                  |   |                      |   |                  |   |                  |   |                 |
| 2   | A little of the time |                                                                                         |                                                                                                                                                                                                                                                                                   |   |                  |   |                      |   |                  |   |                  |   |                 |
| 3   | Some of the time     |                                                                                         |                                                                                                                                                                                                                                                                                   |   |                  |   |                      |   |                  |   |                  |   |                 |
| 4   | Most of the time     |                                                                                         |                                                                                                                                                                                                                                                                                   |   |                  |   |                      |   |                  |   |                  |   |                 |
| 5   | All of the time      |                                                                                         |                                                                                                                                                                                                                                                                                   |   |                  |   |                      |   |                  |   |                  |   |                 |
| 509 | ss10                 | Someone to get together with for relaxation U, K:ss10ru                                 | radio (Matrix)<br><table border="1"> <tr><td>1</td><td>None of the time</td></tr> <tr><td>2</td><td>A little of the time</td></tr> <tr><td>3</td><td>Some of the time</td></tr> <tr><td>4</td><td>Most of the time</td></tr> <tr><td>5</td><td>All of the time</td></tr> </table> | 1 | None of the time | 2 | A little of the time | 3 | Some of the time | 4 | Most of the time | 5 | All of the time |
| 1   | None of the time     |                                                                                         |                                                                                                                                                                                                                                                                                   |   |                  |   |                      |   |                  |   |                  |   |                 |
| 2   | A little of the time |                                                                                         |                                                                                                                                                                                                                                                                                   |   |                  |   |                      |   |                  |   |                  |   |                 |
| 3   | Some of the time     |                                                                                         |                                                                                                                                                                                                                                                                                   |   |                  |   |                      |   |                  |   |                  |   |                 |
| 4   | Most of the time     |                                                                                         |                                                                                                                                                                                                                                                                                   |   |                  |   |                      |   |                  |   |                  |   |                 |
| 5   | All of the time      |                                                                                         |                                                                                                                                                                                                                                                                                   |   |                  |   |                      |   |                  |   |                  |   |                 |
| 510 | ss11                 | Someone to prepare your meals if you were unable to do it yourself U, K:ss11ru          | radio (Matrix)<br><table border="1"> <tr><td>1</td><td>None of the time</td></tr> <tr><td>2</td><td>A little of the time</td></tr> <tr><td>3</td><td>Some of the time</td></tr> <tr><td>4</td><td>Most of the time</td></tr> <tr><td>5</td><td>All of the time</td></tr> </table> | 1 | None of the time | 2 | A little of the time | 3 | Some of the time | 4 | Most of the time | 5 | All of the time |
| 1   | None of the time     |                                                                                         |                                                                                                                                                                                                                                                                                   |   |                  |   |                      |   |                  |   |                  |   |                 |
| 2   | A little of the time |                                                                                         |                                                                                                                                                                                                                                                                                   |   |                  |   |                      |   |                  |   |                  |   |                 |
| 3   | Some of the time     |                                                                                         |                                                                                                                                                                                                                                                                                   |   |                  |   |                      |   |                  |   |                  |   |                 |
| 4   | Most of the time     |                                                                                         |                                                                                                                                                                                                                                                                                   |   |                  |   |                      |   |                  |   |                  |   |                 |
| 5   | All of the time      |                                                                                         |                                                                                                                                                                                                                                                                                   |   |                  |   |                      |   |                  |   |                  |   |                 |
| 511 | ss12                 | Someone whose advice you really want U, K:ss12ru                                        | radio (Matrix)<br><table border="1"> <tr><td>1</td><td>None of the time</td></tr> <tr><td>2</td><td>A little of the time</td></tr> <tr><td>3</td><td>Some of the time</td></tr> <tr><td>4</td><td>Most of the time</td></tr> <tr><td>5</td><td>All of the time</td></tr> </table> | 1 | None of the time | 2 | A little of the time | 3 | Some of the time | 4 | Most of the time | 5 | All of the time |
| 1   | None of the time     |                                                                                         |                                                                                                                                                                                                                                                                                   |   |                  |   |                      |   |                  |   |                  |   |                 |
| 2   | A little of the time |                                                                                         |                                                                                                                                                                                                                                                                                   |   |                  |   |                      |   |                  |   |                  |   |                 |
| 3   | Some of the time     |                                                                                         |                                                                                                                                                                                                                                                                                   |   |                  |   |                      |   |                  |   |                  |   |                 |
| 4   | Most of the time     |                                                                                         |                                                                                                                                                                                                                                                                                   |   |                  |   |                      |   |                  |   |                  |   |                 |
| 5   | All of the time      |                                                                                         |                                                                                                                                                                                                                                                                                   |   |                  |   |                      |   |                  |   |                  |   |                 |
| 512 | ss13                 | Someone to do things with to get your mind off things U, K:ss13ru                       | radio (Matrix)<br><table border="1"> <tr><td>1</td><td>None of the time</td></tr> <tr><td>2</td><td>A little of the time</td></tr> <tr><td>3</td><td>Some of the time</td></tr> <tr><td>4</td><td>Most of the time</td></tr> <tr><td>5</td><td>All of the time</td></tr> </table> | 1 | None of the time | 2 | A little of the time | 3 | Some of the time | 4 | Most of the time | 5 | All of the time |
| 1   | None of the time     |                                                                                         |                                                                                                                                                                                                                                                                                   |   |                  |   |                      |   |                  |   |                  |   |                 |
| 2   | A little of the time |                                                                                         |                                                                                                                                                                                                                                                                                   |   |                  |   |                      |   |                  |   |                  |   |                 |
| 3   | Some of the time     |                                                                                         |                                                                                                                                                                                                                                                                                   |   |                  |   |                      |   |                  |   |                  |   |                 |
| 4   | Most of the time     |                                                                                         |                                                                                                                                                                                                                                                                                   |   |                  |   |                      |   |                  |   |                  |   |                 |
| 5   | All of the time      |                                                                                         |                                                                                                                                                                                                                                                                                   |   |                  |   |                      |   |                  |   |                  |   |                 |
| 513 | ss14                 | Someone to help with daily chores if you were sick U, K:ss14ru                          | radio (Matrix)<br><table border="1"> <tr><td>1</td><td>None of the time</td></tr> <tr><td>2</td><td>A little of the time</td></tr> <tr><td>3</td><td>Some of the time</td></tr> <tr><td>4</td><td>Most of the time</td></tr> <tr><td>5</td><td>All of the time</td></tr> </table> | 1 | None of the time | 2 | A little of the time | 3 | Some of the time | 4 | Most of the time | 5 | All of the time |
| 1   | None of the time     |                                                                                         |                                                                                                                                                                                                                                                                                   |   |                  |   |                      |   |                  |   |                  |   |                 |
| 2   | A little of the time |                                                                                         |                                                                                                                                                                                                                                                                                   |   |                  |   |                      |   |                  |   |                  |   |                 |
| 3   | Some of the time     |                                                                                         |                                                                                                                                                                                                                                                                                   |   |                  |   |                      |   |                  |   |                  |   |                 |
| 4   | Most of the time     |                                                                                         |                                                                                                                                                                                                                                                                                   |   |                  |   |                      |   |                  |   |                  |   |                 |
| 5   | All of the time      |                                                                                         |                                                                                                                                                                                                                                                                                   |   |                  |   |                      |   |                  |   |                  |   |                 |
| 514 | ss15                 | Someone to share your most private worries and fears with U, K:ss15ru                   | radio (Matrix)<br><table border="1"> <tr><td>1</td><td>None of the time</td></tr> <tr><td>2</td><td>A little of the time</td></tr> <tr><td>3</td><td>Some of the time</td></tr> <tr><td>4</td><td>Most of the time</td></tr> <tr><td>5</td><td>All of the time</td></tr> </table> | 1 | None of the time | 2 | A little of the time | 3 | Some of the time | 4 | Most of the time | 5 | All of the time |
| 1   | None of the time     |                                                                                         |                                                                                                                                                                                                                                                                                   |   |                  |   |                      |   |                  |   |                  |   |                 |
| 2   | A little of the time |                                                                                         |                                                                                                                                                                                                                                                                                   |   |                  |   |                      |   |                  |   |                  |   |                 |
| 3   | Some of the time     |                                                                                         |                                                                                                                                                                                                                                                                                   |   |                  |   |                      |   |                  |   |                  |   |                 |
| 4   | Most of the time     |                                                                                         |                                                                                                                                                                                                                                                                                   |   |                  |   |                      |   |                  |   |                  |   |                 |
| 5   | All of the time      |                                                                                         |                                                                                                                                                                                                                                                                                   |   |                  |   |                      |   |                  |   |                  |   |                 |
| 515 | ss16                 | Someone to turn to for suggestions about how to deal with personal problems U, K:ss16ru | radio (Matrix)<br><table border="1"> <tr><td>1</td><td>None of the time</td></tr> <tr><td>2</td><td>A little of the time</td></tr> <tr><td>3</td><td>Some of the time</td></tr> <tr><td>4</td><td>Most of the time</td></tr> <tr><td>5</td><td>All of the time</td></tr> </table> | 1 | None of the time | 2 | A little of the time | 3 | Some of the time | 4 | Most of the time | 5 | All of the time |
| 1   | None of the time     |                                                                                         |                                                                                                                                                                                                                                                                                   |   |                  |   |                      |   |                  |   |                  |   |                 |
| 2   | A little of the time |                                                                                         |                                                                                                                                                                                                                                                                                   |   |                  |   |                      |   |                  |   |                  |   |                 |
| 3   | Some of the time     |                                                                                         |                                                                                                                                                                                                                                                                                   |   |                  |   |                      |   |                  |   |                  |   |                 |
| 4   | Most of the time     |                                                                                         |                                                                                                                                                                                                                                                                                   |   |                  |   |                      |   |                  |   |                  |   |                 |
| 5   | All of the time      |                                                                                         |                                                                                                                                                                                                                                                                                   |   |                  |   |                      |   |                  |   |                  |   |                 |

|     |                                                                   |                                                                                                                                                                                                             |                                                                                                                                                                                                                                                                                                                                                                                                                                 |   |                  |   |                      |   |                   |   |                       |   |                 |   |   |   |   |   |   |   |   |    |                      |   |                     |
|-----|-------------------------------------------------------------------|-------------------------------------------------------------------------------------------------------------------------------------------------------------------------------------------------------------|---------------------------------------------------------------------------------------------------------------------------------------------------------------------------------------------------------------------------------------------------------------------------------------------------------------------------------------------------------------------------------------------------------------------------------|---|------------------|---|----------------------|---|-------------------|---|-----------------------|---|-----------------|---|---|---|---|---|---|---|---|----|----------------------|---|---------------------|
| 516 | ss17                                                              | Someone to do something enjoyable with U, K:ss17ru                                                                                                                                                          | radio (Matrix)<br><table border="1"> <tr><td>1</td><td>None of the time</td></tr> <tr><td>2</td><td>A little of the time</td></tr> <tr><td>3</td><td>Some of the time</td></tr> <tr><td>4</td><td>Most of the time</td></tr> <tr><td>5</td><td>All of the time</td></tr> </table>                                                                                                                                               | 1 | None of the time | 2 | A little of the time | 3 | Some of the time  | 4 | Most of the time      | 5 | All of the time |   |   |   |   |   |   |   |   |    |                      |   |                     |
| 1   | None of the time                                                  |                                                                                                                                                                                                             |                                                                                                                                                                                                                                                                                                                                                                                                                                 |   |                  |   |                      |   |                   |   |                       |   |                 |   |   |   |   |   |   |   |   |    |                      |   |                     |
| 2   | A little of the time                                              |                                                                                                                                                                                                             |                                                                                                                                                                                                                                                                                                                                                                                                                                 |   |                  |   |                      |   |                   |   |                       |   |                 |   |   |   |   |   |   |   |   |    |                      |   |                     |
| 3   | Some of the time                                                  |                                                                                                                                                                                                             |                                                                                                                                                                                                                                                                                                                                                                                                                                 |   |                  |   |                      |   |                   |   |                       |   |                 |   |   |   |   |   |   |   |   |    |                      |   |                     |
| 4   | Most of the time                                                  |                                                                                                                                                                                                             |                                                                                                                                                                                                                                                                                                                                                                                                                                 |   |                  |   |                      |   |                   |   |                       |   |                 |   |   |   |   |   |   |   |   |    |                      |   |                     |
| 5   | All of the time                                                   |                                                                                                                                                                                                             |                                                                                                                                                                                                                                                                                                                                                                                                                                 |   |                  |   |                      |   |                   |   |                       |   |                 |   |   |   |   |   |   |   |   |    |                      |   |                     |
| 517 | ss18                                                              | Someone to understand your problems U, K:ss18ru                                                                                                                                                             | radio (Matrix)<br><table border="1"> <tr><td>1</td><td>None of the time</td></tr> <tr><td>2</td><td>A little of the time</td></tr> <tr><td>3</td><td>Some of the time</td></tr> <tr><td>4</td><td>Most of the time</td></tr> <tr><td>5</td><td>All of the time</td></tr> </table>                                                                                                                                               | 1 | None of the time | 2 | A little of the time | 3 | Some of the time  | 4 | Most of the time      | 5 | All of the time |   |   |   |   |   |   |   |   |    |                      |   |                     |
| 1   | None of the time                                                  |                                                                                                                                                                                                             |                                                                                                                                                                                                                                                                                                                                                                                                                                 |   |                  |   |                      |   |                   |   |                       |   |                 |   |   |   |   |   |   |   |   |    |                      |   |                     |
| 2   | A little of the time                                              |                                                                                                                                                                                                             |                                                                                                                                                                                                                                                                                                                                                                                                                                 |   |                  |   |                      |   |                   |   |                       |   |                 |   |   |   |   |   |   |   |   |    |                      |   |                     |
| 3   | Some of the time                                                  |                                                                                                                                                                                                             |                                                                                                                                                                                                                                                                                                                                                                                                                                 |   |                  |   |                      |   |                   |   |                       |   |                 |   |   |   |   |   |   |   |   |    |                      |   |                     |
| 4   | Most of the time                                                  |                                                                                                                                                                                                             |                                                                                                                                                                                                                                                                                                                                                                                                                                 |   |                  |   |                      |   |                   |   |                       |   |                 |   |   |   |   |   |   |   |   |    |                      |   |                     |
| 5   | All of the time                                                   |                                                                                                                                                                                                             |                                                                                                                                                                                                                                                                                                                                                                                                                                 |   |                  |   |                      |   |                   |   |                       |   |                 |   |   |   |   |   |   |   |   |    |                      |   |                     |
| 518 | ss19                                                              | Someone to love and make you feel wanted U, K:ss19ru                                                                                                                                                        | radio (Matrix)<br><table border="1"> <tr><td>1</td><td>None of the time</td></tr> <tr><td>2</td><td>A little of the time</td></tr> <tr><td>3</td><td>Some of the time</td></tr> <tr><td>4</td><td>Most of the time</td></tr> <tr><td>5</td><td>All of the time</td></tr> </table>                                                                                                                                               | 1 | None of the time | 2 | A little of the time | 3 | Some of the time  | 4 | Most of the time      | 5 | All of the time |   |   |   |   |   |   |   |   |    |                      |   |                     |
| 1   | None of the time                                                  |                                                                                                                                                                                                             |                                                                                                                                                                                                                                                                                                                                                                                                                                 |   |                  |   |                      |   |                   |   |                       |   |                 |   |   |   |   |   |   |   |   |    |                      |   |                     |
| 2   | A little of the time                                              |                                                                                                                                                                                                             |                                                                                                                                                                                                                                                                                                                                                                                                                                 |   |                  |   |                      |   |                   |   |                       |   |                 |   |   |   |   |   |   |   |   |    |                      |   |                     |
| 3   | Some of the time                                                  |                                                                                                                                                                                                             |                                                                                                                                                                                                                                                                                                                                                                                                                                 |   |                  |   |                      |   |                   |   |                       |   |                 |   |   |   |   |   |   |   |   |    |                      |   |                     |
| 4   | Most of the time                                                  |                                                                                                                                                                                                             |                                                                                                                                                                                                                                                                                                                                                                                                                                 |   |                  |   |                      |   |                   |   |                       |   |                 |   |   |   |   |   |   |   |   |    |                      |   |                     |
| 5   | All of the time                                                   |                                                                                                                                                                                                             |                                                                                                                                                                                                                                                                                                                                                                                                                                 |   |                  |   |                      |   |                   |   |                       |   |                 |   |   |   |   |   |   |   |   |    |                      |   |                     |
| 519 | ss20                                                              | 20. About how many close friends and close relatives do you have (i.e. people you feel at ease with and can talk to about what is on your mind)? U, K:ss20ru                                                | text (number, Min: 0, Max: 20)                                                                                                                                                                                                                                                                                                                                                                                                  |   |                  |   |                      |   |                   |   |                       |   |                 |   |   |   |   |   |   |   |   |    |                      |   |                     |
| 520 | ss21a                                                             | 21a. On a scale of 1 to 10 where 1 is not at all and 10 is VERY supportive, how would you describe the level of support the person who provides you support has toward you being/entering OST? U, K:ss21aru | radio<br><table border="1"> <tr><td>1</td><td>1-not at all</td></tr> <tr><td>2</td><td>2</td></tr> <tr><td>3</td><td>3</td></tr> <tr><td>4</td><td>4</td></tr> <tr><td>5</td><td>5</td></tr> <tr><td>6</td><td>6</td></tr> <tr><td>7</td><td>7</td></tr> <tr><td>8</td><td>8</td></tr> <tr><td>9</td><td>9</td></tr> <tr><td>10</td><td>10 - VERY supportive</td></tr> <tr><td>0</td><td>Not Applicable(Kyr)</td></tr> </table> | 1 | 1-not at all     | 2 | 2                    | 3 | 3                 | 4 | 4                     | 5 | 5               | 6 | 6 | 7 | 7 | 8 | 8 | 9 | 9 | 10 | 10 - VERY supportive | 0 | Not Applicable(Kyr) |
| 1   | 1-not at all                                                      |                                                                                                                                                                                                             |                                                                                                                                                                                                                                                                                                                                                                                                                                 |   |                  |   |                      |   |                   |   |                       |   |                 |   |   |   |   |   |   |   |   |    |                      |   |                     |
| 2   | 2                                                                 |                                                                                                                                                                                                             |                                                                                                                                                                                                                                                                                                                                                                                                                                 |   |                  |   |                      |   |                   |   |                       |   |                 |   |   |   |   |   |   |   |   |    |                      |   |                     |
| 3   | 3                                                                 |                                                                                                                                                                                                             |                                                                                                                                                                                                                                                                                                                                                                                                                                 |   |                  |   |                      |   |                   |   |                       |   |                 |   |   |   |   |   |   |   |   |    |                      |   |                     |
| 4   | 4                                                                 |                                                                                                                                                                                                             |                                                                                                                                                                                                                                                                                                                                                                                                                                 |   |                  |   |                      |   |                   |   |                       |   |                 |   |   |   |   |   |   |   |   |    |                      |   |                     |
| 5   | 5                                                                 |                                                                                                                                                                                                             |                                                                                                                                                                                                                                                                                                                                                                                                                                 |   |                  |   |                      |   |                   |   |                       |   |                 |   |   |   |   |   |   |   |   |    |                      |   |                     |
| 6   | 6                                                                 |                                                                                                                                                                                                             |                                                                                                                                                                                                                                                                                                                                                                                                                                 |   |                  |   |                      |   |                   |   |                       |   |                 |   |   |   |   |   |   |   |   |    |                      |   |                     |
| 7   | 7                                                                 |                                                                                                                                                                                                             |                                                                                                                                                                                                                                                                                                                                                                                                                                 |   |                  |   |                      |   |                   |   |                       |   |                 |   |   |   |   |   |   |   |   |    |                      |   |                     |
| 8   | 8                                                                 |                                                                                                                                                                                                             |                                                                                                                                                                                                                                                                                                                                                                                                                                 |   |                  |   |                      |   |                   |   |                       |   |                 |   |   |   |   |   |   |   |   |    |                      |   |                     |
| 9   | 9                                                                 |                                                                                                                                                                                                             |                                                                                                                                                                                                                                                                                                                                                                                                                                 |   |                  |   |                      |   |                   |   |                       |   |                 |   |   |   |   |   |   |   |   |    |                      |   |                     |
| 10  | 10 - VERY supportive                                              |                                                                                                                                                                                                             |                                                                                                                                                                                                                                                                                                                                                                                                                                 |   |                  |   |                      |   |                   |   |                       |   |                 |   |   |   |   |   |   |   |   |    |                      |   |                     |
| 0   | Not Applicable(Kyr)                                               |                                                                                                                                                                                                             |                                                                                                                                                                                                                                                                                                                                                                                                                                 |   |                  |   |                      |   |                   |   |                       |   |                 |   |   |   |   |   |   |   |   |    |                      |   |                     |
| 521 | ss21b<br>Show the field ONLY if:<br>[screen_arm_1][country] = '3' | 21b. Did you get a suspended sentence before? U, K:ss21bru                                                                                                                                                  | yesno<br><table border="1"> <tr><td>1</td><td>Yes</td></tr> <tr><td>0</td><td>No</td></tr> </table>                                                                                                                                                                                                                                                                                                                             | 1 | Yes              | 0 | No                   |   |                   |   |                       |   |                 |   |   |   |   |   |   |   |   |    |                      |   |                     |
| 1   | Yes                                                               |                                                                                                                                                                                                             |                                                                                                                                                                                                                                                                                                                                                                                                                                 |   |                  |   |                      |   |                   |   |                       |   |                 |   |   |   |   |   |   |   |   |    |                      |   |                     |
| 0   | No                                                                |                                                                                                                                                                                                             |                                                                                                                                                                                                                                                                                                                                                                                                                                 |   |                  |   |                      |   |                   |   |                       |   |                 |   |   |   |   |   |   |   |   |    |                      |   |                     |
| 522 | ss22<br>Show the field ONLY if:<br>[screen_arm_1][country] = '3'  | 22. Do you receive any social support from probation officers:ss22ru, K: N/A                                                                                                                                | yesno<br><table border="1"> <tr><td>1</td><td>Yes</td></tr> <tr><td>0</td><td>No</td></tr> </table>                                                                                                                                                                                                                                                                                                                             | 1 | Yes              | 0 | No                   |   |                   |   |                       |   |                 |   |   |   |   |   |   |   |   |    |                      |   |                     |
| 1   | Yes                                                               |                                                                                                                                                                                                             |                                                                                                                                                                                                                                                                                                                                                                                                                                 |   |                  |   |                      |   |                   |   |                       |   |                 |   |   |   |   |   |   |   |   |    |                      |   |                     |
| 0   | No                                                                |                                                                                                                                                                                                             |                                                                                                                                                                                                                                                                                                                                                                                                                                 |   |                  |   |                      |   |                   |   |                       |   |                 |   |   |   |   |   |   |   |   |    |                      |   |                     |
| 523 | ss22a<br>Show the field ONLY if:<br>[screen_arm_1][country] = '3' | 22a. How much social support do you get?U:ss22aru, K: N/A                                                                                                                                                   | radio, Required<br><table border="1"> <tr><td>1</td><td>Very little</td></tr> <tr><td>2</td><td>a bit</td></tr> <tr><td>3</td><td>A moderate amount</td></tr> <tr><td>4</td><td>More than fair amount</td></tr> <tr><td>5</td><td>A lot</td></tr> </table>                                                                                                                                                                      | 1 | Very little      | 2 | a bit                | 3 | A moderate amount | 4 | More than fair amount | 5 | A lot           |   |   |   |   |   |   |   |   |    |                      |   |                     |
| 1   | Very little                                                       |                                                                                                                                                                                                             |                                                                                                                                                                                                                                                                                                                                                                                                                                 |   |                  |   |                      |   |                   |   |                       |   |                 |   |   |   |   |   |   |   |   |    |                      |   |                     |
| 2   | a bit                                                             |                                                                                                                                                                                                             |                                                                                                                                                                                                                                                                                                                                                                                                                                 |   |                  |   |                      |   |                   |   |                       |   |                 |   |   |   |   |   |   |   |   |    |                      |   |                     |
| 3   | A moderate amount                                                 |                                                                                                                                                                                                             |                                                                                                                                                                                                                                                                                                                                                                                                                                 |   |                  |   |                      |   |                   |   |                       |   |                 |   |   |   |   |   |   |   |   |    |                      |   |                     |
| 4   | More than fair amount                                             |                                                                                                                                                                                                             |                                                                                                                                                                                                                                                                                                                                                                                                                                 |   |                  |   |                      |   |                   |   |                       |   |                 |   |   |   |   |   |   |   |   |    |                      |   |                     |
| 5   | A lot                                                             |                                                                                                                                                                                                             |                                                                                                                                                                                                                                                                                                                                                                                                                                 |   |                  |   |                      |   |                   |   |                       |   |                 |   |   |   |   |   |   |   |   |    |                      |   |                     |

|     |                                                                       |                                                                                                           |                                                                                                                                                                                                                                                                                                                                                     |   |                       |   |                                     |   |                       |   |                                                                       |   |                       |
|-----|-----------------------------------------------------------------------|-----------------------------------------------------------------------------------------------------------|-----------------------------------------------------------------------------------------------------------------------------------------------------------------------------------------------------------------------------------------------------------------------------------------------------------------------------------------------------|---|-----------------------|---|-------------------------------------|---|-----------------------|---|-----------------------------------------------------------------------|---|-----------------------|
| 524 | ss23<br>Show the field ONLY if:<br>[screen_arm_1][country] = '3'      | 23. What kinds of support you would like to get from probation officers?U:ss23ru, K: N/A                  | radio<br><table border="1"> <tr><td>1</td><td>employment assistance</td></tr> <tr><td>2</td><td>assistance in obtaining health care</td></tr> <tr><td>3</td><td>legal advice</td></tr> <tr><td>4</td><td>psychological/social support for the problems of family relationships</td></tr> <tr><td>5</td><td>other (specify) _____</td></tr> </table> | 1 | employment assistance | 2 | assistance in obtaining health care | 3 | legal advice          | 4 | psychological/social support for the problems of family relationships | 5 | other (specify) _____ |
| 1   | employment assistance                                                 |                                                                                                           |                                                                                                                                                                                                                                                                                                                                                     |   |                       |   |                                     |   |                       |   |                                                                       |   |                       |
| 2   | assistance in obtaining health care                                   |                                                                                                           |                                                                                                                                                                                                                                                                                                                                                     |   |                       |   |                                     |   |                       |   |                                                                       |   |                       |
| 3   | legal advice                                                          |                                                                                                           |                                                                                                                                                                                                                                                                                                                                                     |   |                       |   |                                     |   |                       |   |                                                                       |   |                       |
| 4   | psychological/social support for the problems of family relationships |                                                                                                           |                                                                                                                                                                                                                                                                                                                                                     |   |                       |   |                                     |   |                       |   |                                                                       |   |                       |
| 5   | other (specify) _____                                                 |                                                                                                           |                                                                                                                                                                                                                                                                                                                                                     |   |                       |   |                                     |   |                       |   |                                                                       |   |                       |
| 525 | ss23oth<br>Show the field ONLY if:<br>[ss23] = '5'                    | 23. Other (specify)                                                                                       | text                                                                                                                                                                                                                                                                                                                                                |   |                       |   |                                     |   |                       |   |                                                                       |   |                       |
| 526 | ss24<br>Show the field ONLY if:<br>[screen_arm_1][country] = '3'      | 24. Would you like a probation officer to help you in obtaining treatment for opioid dependence? U:ss24ru | radio<br><table border="1"> <tr><td>1</td><td>Yes</td></tr> <tr><td>0</td><td>No</td></tr> </table>                                                                                                                                                                                                                                                 | 1 | Yes                   | 0 | No                                  |   |                       |   |                                                                       |   |                       |
| 1   | Yes                                                                   |                                                                                                           |                                                                                                                                                                                                                                                                                                                                                     |   |                       |   |                                     |   |                       |   |                                                                       |   |                       |
| 0   | No                                                                    |                                                                                                           |                                                                                                                                                                                                                                                                                                                                                     |   |                       |   |                                     |   |                       |   |                                                                       |   |                       |
| 527 | ss24a<br>Show the field ONLY if:<br>[screen_arm_1][country] = '3'     | 24a. What category of probation officers would you prefer to get help from?U:ss24aru                      | radio<br><table border="1"> <tr><td>1</td><td>Lawyer</td></tr> <tr><td>2</td><td>Social worker</td></tr> <tr><td>3</td><td>Other (specify) _____</td></tr> </table>                                                                                                                                                                                 | 1 | Lawyer                | 2 | Social worker                       | 3 | Other (specify) _____ |   |                                                                       |   |                       |
| 1   | Lawyer                                                                |                                                                                                           |                                                                                                                                                                                                                                                                                                                                                     |   |                       |   |                                     |   |                       |   |                                                                       |   |                       |
| 2   | Social worker                                                         |                                                                                                           |                                                                                                                                                                                                                                                                                                                                                     |   |                       |   |                                     |   |                       |   |                                                                       |   |                       |
| 3   | Other (specify) _____                                                 |                                                                                                           |                                                                                                                                                                                                                                                                                                                                                     |   |                       |   |                                     |   |                       |   |                                                                       |   |                       |
| 528 | ss24aoth<br>Show the field ONLY if:<br>[screen_arm_1][country] = '3'  | 24. Other(specify) U:ss24aothru                                                                           | text                                                                                                                                                                                                                                                                                                                                                |   |                       |   |                                     |   |                       |   |                                                                       |   |                       |
| 529 | social_support_complete                                               | Section Header: <i>Form Status</i><br>Complete?                                                           | dropdown<br><table border="1"> <tr><td>0</td><td>Incomplete</td></tr> <tr><td>1</td><td>Unverified</td></tr> <tr><td>2</td><td>Complete</td></tr> </table>                                                                                                                                                                                          | 0 | Incomplete            | 1 | Unverified                          | 2 | Complete              |   |                                                                       |   |                       |
| 0   | Incomplete                                                            |                                                                                                           |                                                                                                                                                                                                                                                                                                                                                     |   |                       |   |                                     |   |                       |   |                                                                       |   |                       |
| 1   | Unverified                                                            |                                                                                                           |                                                                                                                                                                                                                                                                                                                                                     |   |                       |   |                                     |   |                       |   |                                                                       |   |                       |
| 2   | Complete                                                              |                                                                                                           |                                                                                                                                                                                                                                                                                                                                                     |   |                       |   |                                     |   |                       |   |                                                                       |   |                       |

Instrument: **IMB** (imb)

[^ Collapse](#)

|     |                                            |                                                                                                                                                                                                               |                                                                                                                                                                                                                                                                                                                                             |   |                   |   |                   |   |                            |   |                |   |                |   |                          |
|-----|--------------------------------------------|---------------------------------------------------------------------------------------------------------------------------------------------------------------------------------------------------------------|---------------------------------------------------------------------------------------------------------------------------------------------------------------------------------------------------------------------------------------------------------------------------------------------------------------------------------------------|---|-------------------|---|-------------------|---|----------------------------|---|----------------|---|----------------|---|--------------------------|
| 530 | imb1<br>Show the field ONLY if:<br>[ma6]>0 | Section Header: <i>INFORMATION</i><br>I know how methadone is supposed to be taken (for example whether or not it can be taken with food, herbal supplements, or other prescription medications). U, K:imb1ru | radio (Matrix)<br><table border="1"> <tr><td>1</td><td>strongly disagree</td></tr> <tr><td>2</td><td>somewhat disagree</td></tr> <tr><td>3</td><td>neither agree nor disagree</td></tr> <tr><td>4</td><td>somewhat agree</td></tr> <tr><td>5</td><td>strongly agree</td></tr> <tr><td>9</td><td>Not Applicable(Kyr only)</td></tr> </table> | 1 | strongly disagree | 2 | somewhat disagree | 3 | neither agree nor disagree | 4 | somewhat agree | 5 | strongly agree | 9 | Not Applicable(Kyr only) |
| 1   | strongly disagree                          |                                                                                                                                                                                                               |                                                                                                                                                                                                                                                                                                                                             |   |                   |   |                   |   |                            |   |                |   |                |   |                          |
| 2   | somewhat disagree                          |                                                                                                                                                                                                               |                                                                                                                                                                                                                                                                                                                                             |   |                   |   |                   |   |                            |   |                |   |                |   |                          |
| 3   | neither agree nor disagree                 |                                                                                                                                                                                                               |                                                                                                                                                                                                                                                                                                                                             |   |                   |   |                   |   |                            |   |                |   |                |   |                          |
| 4   | somewhat agree                             |                                                                                                                                                                                                               |                                                                                                                                                                                                                                                                                                                                             |   |                   |   |                   |   |                            |   |                |   |                |   |                          |
| 5   | strongly agree                             |                                                                                                                                                                                                               |                                                                                                                                                                                                                                                                                                                                             |   |                   |   |                   |   |                            |   |                |   |                |   |                          |
| 9   | Not Applicable(Kyr only)                   |                                                                                                                                                                                                               |                                                                                                                                                                                                                                                                                                                                             |   |                   |   |                   |   |                            |   |                |   |                |   |                          |
| 531 | imb2<br>Show the field ONLY if:<br>[ma6]>0 | I know what to do if I miss a dose of methadone U, K:imb2ru                                                                                                                                                   | radio (Matrix)<br><table border="1"> <tr><td>1</td><td>strongly disagree</td></tr> <tr><td>2</td><td>somewhat disagree</td></tr> <tr><td>3</td><td>neither agree nor disagree</td></tr> <tr><td>4</td><td>somewhat agree</td></tr> <tr><td>5</td><td>strongly agree</td></tr> <tr><td>9</td><td>Not Applicable(Kyr only)</td></tr> </table> | 1 | strongly disagree | 2 | somewhat disagree | 3 | neither agree nor disagree | 4 | somewhat agree | 5 | strongly agree | 9 | Not Applicable(Kyr only) |
| 1   | strongly disagree                          |                                                                                                                                                                                                               |                                                                                                                                                                                                                                                                                                                                             |   |                   |   |                   |   |                            |   |                |   |                |   |                          |
| 2   | somewhat disagree                          |                                                                                                                                                                                                               |                                                                                                                                                                                                                                                                                                                                             |   |                   |   |                   |   |                            |   |                |   |                |   |                          |
| 3   | neither agree nor disagree                 |                                                                                                                                                                                                               |                                                                                                                                                                                                                                                                                                                                             |   |                   |   |                   |   |                            |   |                |   |                |   |                          |
| 4   | somewhat agree                             |                                                                                                                                                                                                               |                                                                                                                                                                                                                                                                                                                                             |   |                   |   |                   |   |                            |   |                |   |                |   |                          |
| 5   | strongly agree                             |                                                                                                                                                                                                               |                                                                                                                                                                                                                                                                                                                                             |   |                   |   |                   |   |                            |   |                |   |                |   |                          |
| 9   | Not Applicable(Kyr only)                   |                                                                                                                                                                                                               |                                                                                                                                                                                                                                                                                                                                             |   |                   |   |                   |   |                            |   |                |   |                |   |                          |
| 532 | imb3<br>Show the field ONLY if:<br>[ma6]>0 | Skipping a few of my methadone doses from time to time would not really hurt my health. U, K:imb3ru                                                                                                           | radio (Matrix)<br><table border="1"> <tr><td>1</td><td>strongly disagree</td></tr> <tr><td>2</td><td>somewhat disagree</td></tr> <tr><td>3</td><td>neither agree nor disagree</td></tr> <tr><td>4</td><td>somewhat agree</td></tr> <tr><td>5</td><td>strongly agree</td></tr> <tr><td>9</td><td>Not Applicable(Kyr only)</td></tr> </table> | 1 | strongly disagree | 2 | somewhat disagree | 3 | neither agree nor disagree | 4 | somewhat agree | 5 | strongly agree | 9 | Not Applicable(Kyr only) |
| 1   | strongly disagree                          |                                                                                                                                                                                                               |                                                                                                                                                                                                                                                                                                                                             |   |                   |   |                   |   |                            |   |                |   |                |   |                          |
| 2   | somewhat disagree                          |                                                                                                                                                                                                               |                                                                                                                                                                                                                                                                                                                                             |   |                   |   |                   |   |                            |   |                |   |                |   |                          |
| 3   | neither agree nor disagree                 |                                                                                                                                                                                                               |                                                                                                                                                                                                                                                                                                                                             |   |                   |   |                   |   |                            |   |                |   |                |   |                          |
| 4   | somewhat agree                             |                                                                                                                                                                                                               |                                                                                                                                                                                                                                                                                                                                             |   |                   |   |                   |   |                            |   |                |   |                |   |                          |
| 5   | strongly agree                             |                                                                                                                                                                                                               |                                                                                                                                                                                                                                                                                                                                             |   |                   |   |                   |   |                            |   |                |   |                |   |                          |
| 9   | Not Applicable(Kyr only)                   |                                                                                                                                                                                                               |                                                                                                                                                                                                                                                                                                                                             |   |                   |   |                   |   |                            |   |                |   |                |   |                          |

|     |                                            |                                                                                                                                                        |                                                                                                                                                                    |
|-----|--------------------------------------------|--------------------------------------------------------------------------------------------------------------------------------------------------------|--------------------------------------------------------------------------------------------------------------------------------------------------------------------|
| 533 | imb4<br>Show the field ONLY if:<br>[ma6]>0 | I know what the possible side effects of methadone are. U, K:imb4ru                                                                                    | radio (Matrix)<br>1 strongly disagree<br>2 somewhat disagree<br>3 neither agree nor disagree<br>4 somewhat agree<br>5 strongly agree<br>9 Not Applicable(Kyr only) |
| 534 | imb5<br>Show the field ONLY if:<br>[ma6]>0 | As long as I am feeling healthy, missing my methadone from time to time is OK. U, K:imb5ru                                                             | radio (Matrix)<br>1 strongly disagree<br>2 somewhat disagree<br>3 neither agree nor disagree<br>4 somewhat agree<br>5 strongly agree<br>9 Not Applicable(Kyr only) |
| 535 | imb6<br>Show the field ONLY if:<br>[ma6]>0 | I understand how methadone works in my body to fight drug addiction. U, K:imb6ru                                                                       | radio (Matrix)<br>1 strongly disagree<br>2 somewhat disagree<br>3 neither agree nor disagree<br>4 somewhat agree<br>5 strongly agree<br>9 Not Applicable(Kyr only) |
| 536 | imb7<br>Show the field ONLY if:<br>[ma6]>0 | I believe that if I take methadone as prescribed, I will live longer. U, K:imb7ru                                                                      | radio (Matrix)<br>1 strongly disagree<br>2 somewhat disagree<br>3 neither agree nor disagree<br>4 somewhat agree<br>5 strongly agree<br>9 Not Applicable(Kyr only) |
| 537 | imb8<br>Show the field ONLY if:<br>[ma6]>0 | I know how methadone interacts with alcohol and street drugs (6-I don't drink/use drugs) U, K:imb8ru                                                   | radio (Matrix)<br>1 strongly disagree<br>2 somewhat disagree<br>3 neither agree nor disagree<br>4 somewhat agree<br>5 strongly agree<br>9 Not Applicable(Kyr only) |
| 538 | imb9<br>Show the field ONLY if:<br>[ma6]>0 | Section Header: <i>MOTIVATION</i><br>I am worried that other people might realize that I am a drug addict if they see me taking methadone. U, K:imb9ru | radio (Matrix)<br>1 strongly disagree<br>2 somewhat disagree<br>3 neither agree nor disagree<br>4 somewhat agree<br>5 strongly agree<br>9 Not Applicable(Kyr Only) |



|     |                                             |                                                                                                                                                                                                  |                                                                                                                                                                    |
|-----|---------------------------------------------|--------------------------------------------------------------------------------------------------------------------------------------------------------------------------------------------------|--------------------------------------------------------------------------------------------------------------------------------------------------------------------|
| 539 | imb10<br>Show the field ONLY if:<br>[ma6]>0 | I get frustrated taking methadone because I have to plan my life around it. U, K:imb10ru                                                                                                         | radio (Matrix)<br>1 strongly disagree<br>2 somewhat disagree<br>3 neither agree nor disagree<br>4 somewhat agree<br>5 strongly agree<br>9 Not Applicable(Kyr Only) |
| 540 | imb11<br>Show the field ONLY if:<br>[ma6]>0 | I don't like taking methadone because it reminds me that I am an addict. U, K:imb11ru                                                                                                            | radio (Matrix)<br>1 strongly disagree<br>2 somewhat disagree<br>3 neither agree nor disagree<br>4 somewhat agree<br>5 strongly agree<br>9 Not Applicable(Kyr Only) |
| 541 | imb12<br>Show the field ONLY if:<br>[ma6]>0 | I feel that my healthcare provider takes my needs into account when making recommendations about treatment with methadone. U, K:imb12ru                                                          | radio (Matrix)<br>1 strongly disagree<br>2 somewhat disagree<br>3 neither agree nor disagree<br>4 somewhat agree<br>5 strongly agree<br>9 Not Applicable(Kyr Only) |
| 542 | imb13<br>Show the field ONLY if:<br>[ma6]>0 | Most people who are important to me who know I'm an addict support me in taking methadone. U, K:imb13ru                                                                                          | radio (Matrix)<br>1 strongly disagree<br>2 somewhat disagree<br>3 neither agree nor disagree<br>4 somewhat agree<br>5 strongly agree<br>9 Not Applicable(Kyr Only) |
| 543 | imb14<br>Show the field ONLY if:<br>[ma6]>0 | Most people who are important to me who know I'm an addict support me in taking methadone. My healthcare provider doesn't give me enough support when it comes to taking methadone. U, K:imb14ru | radio (Matrix)<br>1 strongly disagree<br>2 somewhat disagree<br>3 neither agree nor disagree<br>4 somewhat agree<br>5 strongly agree<br>9 Not Applicable(Kyr Only) |
| 544 | imb15<br>Show the field ONLY if:<br>[ma6]>0 | I am worried that methadone will hurt my health. U, K:imb15ru                                                                                                                                    | radio (Matrix)<br>1 strongly disagree<br>2 somewhat disagree<br>3 neither agree nor disagree<br>4 somewhat agree<br>5 strongly agree<br>9 Not Applicable(Kyr Only) |

|     |                                             |                                                                                                                                                                           |                                                                                                                                                                    |
|-----|---------------------------------------------|---------------------------------------------------------------------------------------------------------------------------------------------------------------------------|--------------------------------------------------------------------------------------------------------------------------------------------------------------------|
| 545 | imb16<br>Show the field ONLY if:<br>[ma6]>0 | It upsets me that methadone can affect the way I look. U, K:imb16ru                                                                                                       | radio (Matrix)<br>1 strongly disagree<br>2 somewhat disagree<br>3 neither agree nor disagree<br>4 somewhat agree<br>5 strongly agree<br>9 Not Applicable(Kyr Only) |
| 546 | imb17<br>Show the field ONLY if:<br>[ma6]>0 | It upsets me that methadone can cause side effects. U, K:imb17ru                                                                                                          | radio (Matrix)<br>1 strongly disagree<br>2 somewhat disagree<br>3 neither agree nor disagree<br>4 somewhat agree<br>5 strongly agree<br>9 Not Applicable(Kyr Only) |
| 547 | imb18<br>Show the field ONLY if:<br>[ma6]>0 | Section Header: <i>BEHAVIOR SKILLS</i><br>How hard or easy is it for you to stay informed about OST treatment? U, K:imb18ru                                               | radio (Matrix)<br>1 very hard<br>2 hard<br>3 sometimes hard, sometimes easy<br>4 easy<br>5 very easy<br>9 not applicable(Kyr Only)                                 |
| 548 | imb19<br>Show the field ONLY if:<br>[ma6]>0 | How hard or easy is it for you to get the support you need from others for taking your methadone (for example, from friends, family, doctor, or pharmacist)? U, K:imb19ru | radio (Matrix)<br>1 very hard<br>2 hard<br>3 sometimes hard, sometimes easy<br>4 easy<br>5 very easy<br>9 not applicable(Kyr Only)                                 |
| 549 | imb20<br>Show the field ONLY if:<br>[ma6]>0 | How hard or easy is it for you to get your OST treatment on time? U, K:imb20ru                                                                                            | radio (Matrix)<br>1 very hard<br>2 hard<br>3 sometimes hard, sometimes easy<br>4 easy<br>5 very easy<br>9 not applicable(Kyr Only)                                 |
| 550 | imb21<br>Show the field ONLY if:<br>[ma6]>0 | How hard or easy is it for you to take your methadone when you are wrapped up in what you are doing? U, K:imb21ru                                                         | radio (Matrix)<br>1 very hard<br>2 hard<br>3 sometimes hard, sometimes easy<br>4 easy<br>5 very easy<br>9 not applicable(Kyr Only)                                 |

|     |                                             |                                                                                                                                                                              |                                                                                                                                    |
|-----|---------------------------------------------|------------------------------------------------------------------------------------------------------------------------------------------------------------------------------|------------------------------------------------------------------------------------------------------------------------------------|
| 551 | imb22<br>Show the field ONLY if:<br>[ma6]>0 | How hard or easy is it for you to manage the side effects of your methadone treatment? U:imb22ru                                                                             | radio (Matrix)<br>1 very hard<br>2 hard<br>3 sometimes hard, sometimes easy<br>4 easy<br>5 very easy<br>9 not applicable(Kyr Only) |
| 552 | imb23<br>Show the field ONLY if:<br>[ma6]>0 | How hard or easy is it for you to remember to take your methadone? U, K:imb23ru                                                                                              | radio (Matrix)<br>1 very hard<br>2 hard<br>3 sometimes hard, sometimes easy<br>4 easy<br>5 very easy<br>9 not applicable(Kyr Only) |
| 553 | imb24<br>Show the field ONLY if:<br>[ma6]>0 | How hard or easy is it for you to make your methadone treatment part of your daily life? U, K:imb24ru                                                                        | radio (Matrix)<br>1 very hard<br>2 hard<br>3 sometimes hard, sometimes easy<br>4 easy<br>5 very easy<br>9 not applicable(Kyr Only) |
| 554 | imb25<br>Show the field ONLY if:<br>[ma6]>0 | How hard or easy is it for you to take your methadone when your usual routine changes (for example, when you traveling)? U, K:imb25ru                                        | radio (Matrix)<br>1 very hard<br>2 hard<br>3 sometimes hard, sometimes easy<br>4 easy<br>5 very easy<br>9 not applicable(Kyr Only) |
| 555 | imb26<br>Show the field ONLY if:<br>[ma6]>0 | How hard or easy is it for you to take your methadone when you do not feel good emotionally (for example, when you are depressed, sad, angry, or stressed out)? U, K:imb26ru | radio (Matrix)<br>1 very hard<br>2 hard<br>3 sometimes hard, sometimes easy<br>4 easy<br>5 very easy<br>9 not applicable(Kyr Only) |
| 556 | imb27<br>Show the field ONLY if:<br>[ma6]>0 | How hard or easy is it for you to take your methadone when you feel good physically and don't have any symptoms of your addiction? U, K:imb27ru                              | radio (Matrix)<br>1 very hard<br>2 hard<br>3 sometimes hard, sometimes easy<br>4 easy<br>5 very easy<br>9 not applicable(Kyr Only) |

|                                                                |                                                                                    |                                                                                                                          |                                                                                                                                                                                                                                                                                                                                                                                                                        |   |                 |   |            |   |                                |   |      |   |           |   |                          |   |   |   |   |   |   |   |   |    |                   |
|----------------------------------------------------------------|------------------------------------------------------------------------------------|--------------------------------------------------------------------------------------------------------------------------|------------------------------------------------------------------------------------------------------------------------------------------------------------------------------------------------------------------------------------------------------------------------------------------------------------------------------------------------------------------------------------------------------------------------|---|-----------------|---|------------|---|--------------------------------|---|------|---|-----------|---|--------------------------|---|---|---|---|---|---|---|---|----|-------------------|
| 557                                                            | imb28<br>Show the field ONLY if: [ma6]>0                                           | How hard or easy is it for you to take your methadone when you do NOT feel good physically? U, K:imb28ru                 | radio (Matrix)<br><table border="1"> <tr><td>1</td><td>very hard</td></tr> <tr><td>2</td><td>hard</td></tr> <tr><td>3</td><td>sometimes hard, sometimes easy</td></tr> <tr><td>4</td><td>easy</td></tr> <tr><td>5</td><td>very easy</td></tr> <tr><td>9</td><td>not applicable(Kyr Only)</td></tr> </table>                                                                                                            | 1 | very hard       | 2 | hard       | 3 | sometimes hard, sometimes easy | 4 | easy | 5 | very easy | 9 | not applicable(Kyr Only) |   |   |   |   |   |   |   |   |    |                   |
| 1                                                              | very hard                                                                          |                                                                                                                          |                                                                                                                                                                                                                                                                                                                                                                                                                        |   |                 |   |            |   |                                |   |      |   |           |   |                          |   |   |   |   |   |   |   |   |    |                   |
| 2                                                              | hard                                                                               |                                                                                                                          |                                                                                                                                                                                                                                                                                                                                                                                                                        |   |                 |   |            |   |                                |   |      |   |           |   |                          |   |   |   |   |   |   |   |   |    |                   |
| 3                                                              | sometimes hard, sometimes easy                                                     |                                                                                                                          |                                                                                                                                                                                                                                                                                                                                                                                                                        |   |                 |   |            |   |                                |   |      |   |           |   |                          |   |   |   |   |   |   |   |   |    |                   |
| 4                                                              | easy                                                                               |                                                                                                                          |                                                                                                                                                                                                                                                                                                                                                                                                                        |   |                 |   |            |   |                                |   |      |   |           |   |                          |   |   |   |   |   |   |   |   |    |                   |
| 5                                                              | very easy                                                                          |                                                                                                                          |                                                                                                                                                                                                                                                                                                                                                                                                                        |   |                 |   |            |   |                                |   |      |   |           |   |                          |   |   |   |   |   |   |   |   |    |                   |
| 9                                                              | not applicable(Kyr Only)                                                           |                                                                                                                          |                                                                                                                                                                                                                                                                                                                                                                                                                        |   |                 |   |            |   |                                |   |      |   |           |   |                          |   |   |   |   |   |   |   |   |    |                   |
| 558                                                            | imb29<br>Show the field ONLY if: [ma6]>0                                           | How hard or easy is it for you to talk to your health care provider about your methadone treatment? U, , K:imb29ru       | radio (Matrix)<br><table border="1"> <tr><td>1</td><td>very hard</td></tr> <tr><td>2</td><td>hard</td></tr> <tr><td>3</td><td>sometimes hard, sometimes easy</td></tr> <tr><td>4</td><td>easy</td></tr> <tr><td>5</td><td>very easy</td></tr> <tr><td>9</td><td>not applicable(Kyr Only)</td></tr> </table>                                                                                                            | 1 | very hard       | 2 | hard       | 3 | sometimes hard, sometimes easy | 4 | easy | 5 | very easy | 9 | not applicable(Kyr Only) |   |   |   |   |   |   |   |   |    |                   |
| 1                                                              | very hard                                                                          |                                                                                                                          |                                                                                                                                                                                                                                                                                                                                                                                                                        |   |                 |   |            |   |                                |   |      |   |           |   |                          |   |   |   |   |   |   |   |   |    |                   |
| 2                                                              | hard                                                                               |                                                                                                                          |                                                                                                                                                                                                                                                                                                                                                                                                                        |   |                 |   |            |   |                                |   |      |   |           |   |                          |   |   |   |   |   |   |   |   |    |                   |
| 3                                                              | sometimes hard, sometimes easy                                                     |                                                                                                                          |                                                                                                                                                                                                                                                                                                                                                                                                                        |   |                 |   |            |   |                                |   |      |   |           |   |                          |   |   |   |   |   |   |   |   |    |                   |
| 4                                                              | easy                                                                               |                                                                                                                          |                                                                                                                                                                                                                                                                                                                                                                                                                        |   |                 |   |            |   |                                |   |      |   |           |   |                          |   |   |   |   |   |   |   |   |    |                   |
| 5                                                              | very easy                                                                          |                                                                                                                          |                                                                                                                                                                                                                                                                                                                                                                                                                        |   |                 |   |            |   |                                |   |      |   |           |   |                          |   |   |   |   |   |   |   |   |    |                   |
| 9                                                              | not applicable(Kyr Only)                                                           |                                                                                                                          |                                                                                                                                                                                                                                                                                                                                                                                                                        |   |                 |   |            |   |                                |   |      |   |           |   |                          |   |   |   |   |   |   |   |   |    |                   |
| 559                                                            | imb_complete                                                                       | Section Header: <i>Form Status</i><br>Complete?                                                                          | dropdown<br><table border="1"> <tr><td>0</td><td>Incomplete</td></tr> <tr><td>1</td><td>Unverified</td></tr> <tr><td>2</td><td>Complete</td></tr> </table>                                                                                                                                                                                                                                                             | 0 | Incomplete      | 1 | Unverified | 2 | Complete                       |   |      |   |           |   |                          |   |   |   |   |   |   |   |   |    |                   |
| 0                                                              | Incomplete                                                                         |                                                                                                                          |                                                                                                                                                                                                                                                                                                                                                                                                                        |   |                 |   |            |   |                                |   |      |   |           |   |                          |   |   |   |   |   |   |   |   |    |                   |
| 1                                                              | Unverified                                                                         |                                                                                                                          |                                                                                                                                                                                                                                                                                                                                                                                                                        |   |                 |   |            |   |                                |   |      |   |           |   |                          |   |   |   |   |   |   |   |   |    |                   |
| 2                                                              | Complete                                                                           |                                                                                                                          |                                                                                                                                                                                                                                                                                                                                                                                                                        |   |                 |   |            |   |                                |   |      |   |           |   |                          |   |   |   |   |   |   |   |   |    |                   |
| Instrument: <b>Form 10 And 11 After</b> (form_10_and_11_after) |                                                                                    |                                                                                                                          | <a href="#">^ Collapse</a>                                                                                                                                                                                                                                                                                                                                                                                             |   |                 |   |            |   |                                |   |      |   |           |   |                          |   |   |   |   |   |   |   |   |    |                   |
| 560                                                            | current_on_oat_post                                                                | Is the participant currently on OAT? U:onoat_ruf, K:onoat_ru_v2                                                          | radio<br><table border="1"> <tr><td>1</td><td>Yes</td></tr> <tr><td>0</td><td>No</td></tr> </table>                                                                                                                                                                                                                                                                                                                    | 1 | Yes             | 0 | No         |   |                                |   |      |   |           |   |                          |   |   |   |   |   |   |   |   |    |                   |
| 1                                                              | Yes                                                                                |                                                                                                                          |                                                                                                                                                                                                                                                                                                                                                                                                                        |   |                 |   |            |   |                                |   |      |   |           |   |                          |   |   |   |   |   |   |   |   |    |                   |
| 0                                                              | No                                                                                 |                                                                                                                          |                                                                                                                                                                                                                                                                                                                                                                                                                        |   |                 |   |            |   |                                |   |      |   |           |   |                          |   |   |   |   |   |   |   |   |    |                   |
| 561                                                            | satisfied_treat_length_post<br>Show the field ONLY if: [current_on_oat_post] = '1' | 1. Are you satisfied with the length of your treatment? (0 = not satisfied, 10 = very satisfied) U:f101ruf, K: f101ru_v2 | radio (Matrix)<br><table border="1"> <tr><td>0</td><td>0 Not Satisfied</td></tr> <tr><td>1</td><td>1</td></tr> <tr><td>2</td><td>2</td></tr> <tr><td>3</td><td>3</td></tr> <tr><td>4</td><td>4</td></tr> <tr><td>5</td><td>5</td></tr> <tr><td>6</td><td>6</td></tr> <tr><td>7</td><td>7</td></tr> <tr><td>8</td><td>8</td></tr> <tr><td>9</td><td>9</td></tr> <tr><td>10</td><td>10 Very Satisfied</td></tr> </table> | 0 | 0 Not Satisfied | 1 | 1          | 2 | 2                              | 3 | 3    | 4 | 4         | 5 | 5                        | 6 | 6 | 7 | 7 | 8 | 8 | 9 | 9 | 10 | 10 Very Satisfied |
| 0                                                              | 0 Not Satisfied                                                                    |                                                                                                                          |                                                                                                                                                                                                                                                                                                                                                                                                                        |   |                 |   |            |   |                                |   |      |   |           |   |                          |   |   |   |   |   |   |   |   |    |                   |
| 1                                                              | 1                                                                                  |                                                                                                                          |                                                                                                                                                                                                                                                                                                                                                                                                                        |   |                 |   |            |   |                                |   |      |   |           |   |                          |   |   |   |   |   |   |   |   |    |                   |
| 2                                                              | 2                                                                                  |                                                                                                                          |                                                                                                                                                                                                                                                                                                                                                                                                                        |   |                 |   |            |   |                                |   |      |   |           |   |                          |   |   |   |   |   |   |   |   |    |                   |
| 3                                                              | 3                                                                                  |                                                                                                                          |                                                                                                                                                                                                                                                                                                                                                                                                                        |   |                 |   |            |   |                                |   |      |   |           |   |                          |   |   |   |   |   |   |   |   |    |                   |
| 4                                                              | 4                                                                                  |                                                                                                                          |                                                                                                                                                                                                                                                                                                                                                                                                                        |   |                 |   |            |   |                                |   |      |   |           |   |                          |   |   |   |   |   |   |   |   |    |                   |
| 5                                                              | 5                                                                                  |                                                                                                                          |                                                                                                                                                                                                                                                                                                                                                                                                                        |   |                 |   |            |   |                                |   |      |   |           |   |                          |   |   |   |   |   |   |   |   |    |                   |
| 6                                                              | 6                                                                                  |                                                                                                                          |                                                                                                                                                                                                                                                                                                                                                                                                                        |   |                 |   |            |   |                                |   |      |   |           |   |                          |   |   |   |   |   |   |   |   |    |                   |
| 7                                                              | 7                                                                                  |                                                                                                                          |                                                                                                                                                                                                                                                                                                                                                                                                                        |   |                 |   |            |   |                                |   |      |   |           |   |                          |   |   |   |   |   |   |   |   |    |                   |
| 8                                                              | 8                                                                                  |                                                                                                                          |                                                                                                                                                                                                                                                                                                                                                                                                                        |   |                 |   |            |   |                                |   |      |   |           |   |                          |   |   |   |   |   |   |   |   |    |                   |
| 9                                                              | 9                                                                                  |                                                                                                                          |                                                                                                                                                                                                                                                                                                                                                                                                                        |   |                 |   |            |   |                                |   |      |   |           |   |                          |   |   |   |   |   |   |   |   |    |                   |
| 10                                                             | 10 Very Satisfied                                                                  |                                                                                                                          |                                                                                                                                                                                                                                                                                                                                                                                                                        |   |                 |   |            |   |                                |   |      |   |           |   |                          |   |   |   |   |   |   |   |   |    |                   |
| 562                                                            | satisfied_dose_post<br>Show the field ONLY if: [current_on_oat_post] = '1'         | 2. Are you satisfied with the dose you are receiving? (0 = not satisfied, 10 = very satisfied) U:f102ruf,K: f102ru_v2    | radio (Matrix)<br><table border="1"> <tr><td>0</td><td>0 Not Satisfied</td></tr> <tr><td>1</td><td>1</td></tr> <tr><td>2</td><td>2</td></tr> <tr><td>3</td><td>3</td></tr> <tr><td>4</td><td>4</td></tr> <tr><td>5</td><td>5</td></tr> <tr><td>6</td><td>6</td></tr> <tr><td>7</td><td>7</td></tr> <tr><td>8</td><td>8</td></tr> <tr><td>9</td><td>9</td></tr> <tr><td>10</td><td>10 Very Satisfied</td></tr> </table> | 0 | 0 Not Satisfied | 1 | 1          | 2 | 2                              | 3 | 3    | 4 | 4         | 5 | 5                        | 6 | 6 | 7 | 7 | 8 | 8 | 9 | 9 | 10 | 10 Very Satisfied |
| 0                                                              | 0 Not Satisfied                                                                    |                                                                                                                          |                                                                                                                                                                                                                                                                                                                                                                                                                        |   |                 |   |            |   |                                |   |      |   |           |   |                          |   |   |   |   |   |   |   |   |    |                   |
| 1                                                              | 1                                                                                  |                                                                                                                          |                                                                                                                                                                                                                                                                                                                                                                                                                        |   |                 |   |            |   |                                |   |      |   |           |   |                          |   |   |   |   |   |   |   |   |    |                   |
| 2                                                              | 2                                                                                  |                                                                                                                          |                                                                                                                                                                                                                                                                                                                                                                                                                        |   |                 |   |            |   |                                |   |      |   |           |   |                          |   |   |   |   |   |   |   |   |    |                   |
| 3                                                              | 3                                                                                  |                                                                                                                          |                                                                                                                                                                                                                                                                                                                                                                                                                        |   |                 |   |            |   |                                |   |      |   |           |   |                          |   |   |   |   |   |   |   |   |    |                   |
| 4                                                              | 4                                                                                  |                                                                                                                          |                                                                                                                                                                                                                                                                                                                                                                                                                        |   |                 |   |            |   |                                |   |      |   |           |   |                          |   |   |   |   |   |   |   |   |    |                   |
| 5                                                              | 5                                                                                  |                                                                                                                          |                                                                                                                                                                                                                                                                                                                                                                                                                        |   |                 |   |            |   |                                |   |      |   |           |   |                          |   |   |   |   |   |   |   |   |    |                   |
| 6                                                              | 6                                                                                  |                                                                                                                          |                                                                                                                                                                                                                                                                                                                                                                                                                        |   |                 |   |            |   |                                |   |      |   |           |   |                          |   |   |   |   |   |   |   |   |    |                   |
| 7                                                              | 7                                                                                  |                                                                                                                          |                                                                                                                                                                                                                                                                                                                                                                                                                        |   |                 |   |            |   |                                |   |      |   |           |   |                          |   |   |   |   |   |   |   |   |    |                   |
| 8                                                              | 8                                                                                  |                                                                                                                          |                                                                                                                                                                                                                                                                                                                                                                                                                        |   |                 |   |            |   |                                |   |      |   |           |   |                          |   |   |   |   |   |   |   |   |    |                   |
| 9                                                              | 9                                                                                  |                                                                                                                          |                                                                                                                                                                                                                                                                                                                                                                                                                        |   |                 |   |            |   |                                |   |      |   |           |   |                          |   |   |   |   |   |   |   |   |    |                   |
| 10                                                             | 10 Very Satisfied                                                                  |                                                                                                                          |                                                                                                                                                                                                                                                                                                                                                                                                                        |   |                 |   |            |   |                                |   |      |   |           |   |                          |   |   |   |   |   |   |   |   |    |                   |

|     |                                                                                                  |                                                                                                                                                                                          |                                                                                                                                                                                                                                                                                                                                                                                                                            |   |                 |   |   |   |   |   |   |   |   |   |   |   |   |   |   |   |   |   |   |    |                   |
|-----|--------------------------------------------------------------------------------------------------|------------------------------------------------------------------------------------------------------------------------------------------------------------------------------------------|----------------------------------------------------------------------------------------------------------------------------------------------------------------------------------------------------------------------------------------------------------------------------------------------------------------------------------------------------------------------------------------------------------------------------|---|-----------------|---|---|---|---|---|---|---|---|---|---|---|---|---|---|---|---|---|---|----|-------------------|
| 563 | <p>oat_side_effects_post</p> <p>Show the field ONLY if:<br/>[current_on_oat_post] = '1'</p>      | <p>3. How often did you experience side effects from the dose you were taking? (0 = very seldom, 10 = very often) U:f103ruf, K: f103ru_v2</p>                                            | <p>radio (Matrix)</p> <table border="1"> <tr><td>0</td><td>0 Not Satisfied</td></tr> <tr><td>1</td><td>1</td></tr> <tr><td>2</td><td>2</td></tr> <tr><td>3</td><td>3</td></tr> <tr><td>4</td><td>4</td></tr> <tr><td>5</td><td>5</td></tr> <tr><td>6</td><td>6</td></tr> <tr><td>7</td><td>7</td></tr> <tr><td>8</td><td>8</td></tr> <tr><td>9</td><td>9</td></tr> <tr><td>10</td><td>10 Very Satisfied</td></tr> </table> | 0 | 0 Not Satisfied | 1 | 1 | 2 | 2 | 3 | 3 | 4 | 4 | 5 | 5 | 6 | 6 | 7 | 7 | 8 | 8 | 9 | 9 | 10 | 10 Very Satisfied |
| 0   | 0 Not Satisfied                                                                                  |                                                                                                                                                                                          |                                                                                                                                                                                                                                                                                                                                                                                                                            |   |                 |   |   |   |   |   |   |   |   |   |   |   |   |   |   |   |   |   |   |    |                   |
| 1   | 1                                                                                                |                                                                                                                                                                                          |                                                                                                                                                                                                                                                                                                                                                                                                                            |   |                 |   |   |   |   |   |   |   |   |   |   |   |   |   |   |   |   |   |   |    |                   |
| 2   | 2                                                                                                |                                                                                                                                                                                          |                                                                                                                                                                                                                                                                                                                                                                                                                            |   |                 |   |   |   |   |   |   |   |   |   |   |   |   |   |   |   |   |   |   |    |                   |
| 3   | 3                                                                                                |                                                                                                                                                                                          |                                                                                                                                                                                                                                                                                                                                                                                                                            |   |                 |   |   |   |   |   |   |   |   |   |   |   |   |   |   |   |   |   |   |    |                   |
| 4   | 4                                                                                                |                                                                                                                                                                                          |                                                                                                                                                                                                                                                                                                                                                                                                                            |   |                 |   |   |   |   |   |   |   |   |   |   |   |   |   |   |   |   |   |   |    |                   |
| 5   | 5                                                                                                |                                                                                                                                                                                          |                                                                                                                                                                                                                                                                                                                                                                                                                            |   |                 |   |   |   |   |   |   |   |   |   |   |   |   |   |   |   |   |   |   |    |                   |
| 6   | 6                                                                                                |                                                                                                                                                                                          |                                                                                                                                                                                                                                                                                                                                                                                                                            |   |                 |   |   |   |   |   |   |   |   |   |   |   |   |   |   |   |   |   |   |    |                   |
| 7   | 7                                                                                                |                                                                                                                                                                                          |                                                                                                                                                                                                                                                                                                                                                                                                                            |   |                 |   |   |   |   |   |   |   |   |   |   |   |   |   |   |   |   |   |   |    |                   |
| 8   | 8                                                                                                |                                                                                                                                                                                          |                                                                                                                                                                                                                                                                                                                                                                                                                            |   |                 |   |   |   |   |   |   |   |   |   |   |   |   |   |   |   |   |   |   |    |                   |
| 9   | 9                                                                                                |                                                                                                                                                                                          |                                                                                                                                                                                                                                                                                                                                                                                                                            |   |                 |   |   |   |   |   |   |   |   |   |   |   |   |   |   |   |   |   |   |    |                   |
| 10  | 10 Very Satisfied                                                                                |                                                                                                                                                                                          |                                                                                                                                                                                                                                                                                                                                                                                                                            |   |                 |   |   |   |   |   |   |   |   |   |   |   |   |   |   |   |   |   |   |    |                   |
| 564 | <p>oat_effectiveness_post</p> <p>Show the field ONLY if:<br/>[current_on_oat_post] = '1'</p>     | <p>4. How effectively does taking methadone or buprenorphine help you reduce other opioid use? (0 = not effective at all, 10 = extremely effective) U:f104ruf , K: f104ru_v2</p>         | <p>radio (Matrix)</p> <table border="1"> <tr><td>0</td><td>0 Not Satisfied</td></tr> <tr><td>1</td><td>1</td></tr> <tr><td>2</td><td>2</td></tr> <tr><td>3</td><td>3</td></tr> <tr><td>4</td><td>4</td></tr> <tr><td>5</td><td>5</td></tr> <tr><td>6</td><td>6</td></tr> <tr><td>7</td><td>7</td></tr> <tr><td>8</td><td>8</td></tr> <tr><td>9</td><td>9</td></tr> <tr><td>10</td><td>10 Very Satisfied</td></tr> </table> | 0 | 0 Not Satisfied | 1 | 1 | 2 | 2 | 3 | 3 | 4 | 4 | 5 | 5 | 6 | 6 | 7 | 7 | 8 | 8 | 9 | 9 | 10 | 10 Very Satisfied |
| 0   | 0 Not Satisfied                                                                                  |                                                                                                                                                                                          |                                                                                                                                                                                                                                                                                                                                                                                                                            |   |                 |   |   |   |   |   |   |   |   |   |   |   |   |   |   |   |   |   |   |    |                   |
| 1   | 1                                                                                                |                                                                                                                                                                                          |                                                                                                                                                                                                                                                                                                                                                                                                                            |   |                 |   |   |   |   |   |   |   |   |   |   |   |   |   |   |   |   |   |   |    |                   |
| 2   | 2                                                                                                |                                                                                                                                                                                          |                                                                                                                                                                                                                                                                                                                                                                                                                            |   |                 |   |   |   |   |   |   |   |   |   |   |   |   |   |   |   |   |   |   |    |                   |
| 3   | 3                                                                                                |                                                                                                                                                                                          |                                                                                                                                                                                                                                                                                                                                                                                                                            |   |                 |   |   |   |   |   |   |   |   |   |   |   |   |   |   |   |   |   |   |    |                   |
| 4   | 4                                                                                                |                                                                                                                                                                                          |                                                                                                                                                                                                                                                                                                                                                                                                                            |   |                 |   |   |   |   |   |   |   |   |   |   |   |   |   |   |   |   |   |   |    |                   |
| 5   | 5                                                                                                |                                                                                                                                                                                          |                                                                                                                                                                                                                                                                                                                                                                                                                            |   |                 |   |   |   |   |   |   |   |   |   |   |   |   |   |   |   |   |   |   |    |                   |
| 6   | 6                                                                                                |                                                                                                                                                                                          |                                                                                                                                                                                                                                                                                                                                                                                                                            |   |                 |   |   |   |   |   |   |   |   |   |   |   |   |   |   |   |   |   |   |    |                   |
| 7   | 7                                                                                                |                                                                                                                                                                                          |                                                                                                                                                                                                                                                                                                                                                                                                                            |   |                 |   |   |   |   |   |   |   |   |   |   |   |   |   |   |   |   |   |   |    |                   |
| 8   | 8                                                                                                |                                                                                                                                                                                          |                                                                                                                                                                                                                                                                                                                                                                                                                            |   |                 |   |   |   |   |   |   |   |   |   |   |   |   |   |   |   |   |   |   |    |                   |
| 9   | 9                                                                                                |                                                                                                                                                                                          |                                                                                                                                                                                                                                                                                                                                                                                                                            |   |                 |   |   |   |   |   |   |   |   |   |   |   |   |   |   |   |   |   |   |    |                   |
| 10  | 10 Very Satisfied                                                                                |                                                                                                                                                                                          |                                                                                                                                                                                                                                                                                                                                                                                                                            |   |                 |   |   |   |   |   |   |   |   |   |   |   |   |   |   |   |   |   |   |    |                   |
| 565 | <p>oat_qol_increase_post</p> <p>Show the field ONLY if:<br/>[current_on_oat_post] = '1'</p>      | <p>5. How much does treatment with methadone/buprenorphine increase your quality of life? (0 = doesn't help at all, 10 = helps a lot) U:f105ruf, K: f105ru_v2</p>                        | <p>radio (Matrix)</p> <table border="1"> <tr><td>0</td><td>0 Not Satisfied</td></tr> <tr><td>1</td><td>1</td></tr> <tr><td>2</td><td>2</td></tr> <tr><td>3</td><td>3</td></tr> <tr><td>4</td><td>4</td></tr> <tr><td>5</td><td>5</td></tr> <tr><td>6</td><td>6</td></tr> <tr><td>7</td><td>7</td></tr> <tr><td>8</td><td>8</td></tr> <tr><td>9</td><td>9</td></tr> <tr><td>10</td><td>10 Very Satisfied</td></tr> </table> | 0 | 0 Not Satisfied | 1 | 1 | 2 | 2 | 3 | 3 | 4 | 4 | 5 | 5 | 6 | 6 | 7 | 7 | 8 | 8 | 9 | 9 | 10 | 10 Very Satisfied |
| 0   | 0 Not Satisfied                                                                                  |                                                                                                                                                                                          |                                                                                                                                                                                                                                                                                                                                                                                                                            |   |                 |   |   |   |   |   |   |   |   |   |   |   |   |   |   |   |   |   |   |    |                   |
| 1   | 1                                                                                                |                                                                                                                                                                                          |                                                                                                                                                                                                                                                                                                                                                                                                                            |   |                 |   |   |   |   |   |   |   |   |   |   |   |   |   |   |   |   |   |   |    |                   |
| 2   | 2                                                                                                |                                                                                                                                                                                          |                                                                                                                                                                                                                                                                                                                                                                                                                            |   |                 |   |   |   |   |   |   |   |   |   |   |   |   |   |   |   |   |   |   |    |                   |
| 3   | 3                                                                                                |                                                                                                                                                                                          |                                                                                                                                                                                                                                                                                                                                                                                                                            |   |                 |   |   |   |   |   |   |   |   |   |   |   |   |   |   |   |   |   |   |    |                   |
| 4   | 4                                                                                                |                                                                                                                                                                                          |                                                                                                                                                                                                                                                                                                                                                                                                                            |   |                 |   |   |   |   |   |   |   |   |   |   |   |   |   |   |   |   |   |   |    |                   |
| 5   | 5                                                                                                |                                                                                                                                                                                          |                                                                                                                                                                                                                                                                                                                                                                                                                            |   |                 |   |   |   |   |   |   |   |   |   |   |   |   |   |   |   |   |   |   |    |                   |
| 6   | 6                                                                                                |                                                                                                                                                                                          |                                                                                                                                                                                                                                                                                                                                                                                                                            |   |                 |   |   |   |   |   |   |   |   |   |   |   |   |   |   |   |   |   |   |    |                   |
| 7   | 7                                                                                                |                                                                                                                                                                                          |                                                                                                                                                                                                                                                                                                                                                                                                                            |   |                 |   |   |   |   |   |   |   |   |   |   |   |   |   |   |   |   |   |   |    |                   |
| 8   | 8                                                                                                |                                                                                                                                                                                          |                                                                                                                                                                                                                                                                                                                                                                                                                            |   |                 |   |   |   |   |   |   |   |   |   |   |   |   |   |   |   |   |   |   |    |                   |
| 9   | 9                                                                                                |                                                                                                                                                                                          |                                                                                                                                                                                                                                                                                                                                                                                                                            |   |                 |   |   |   |   |   |   |   |   |   |   |   |   |   |   |   |   |   |   |    |                   |
| 10  | 10 Very Satisfied                                                                                |                                                                                                                                                                                          |                                                                                                                                                                                                                                                                                                                                                                                                                            |   |                 |   |   |   |   |   |   |   |   |   |   |   |   |   |   |   |   |   |   |    |                   |
| 566 | <p>oat_relations_improve_post</p> <p>Show the field ONLY if:<br/>[current_on_oat_post] = '1'</p> | <p>6. How much does treatment with methadone or buprenorphine affect your relationships with friends and family? (0 = doesn't help at all, 10 = helps a lot) U:f106ruf, K: f106ru_v2</p> | <p>radio (Matrix)</p> <table border="1"> <tr><td>0</td><td>0 Not Satisfied</td></tr> <tr><td>1</td><td>1</td></tr> <tr><td>2</td><td>2</td></tr> <tr><td>3</td><td>3</td></tr> <tr><td>4</td><td>4</td></tr> <tr><td>5</td><td>5</td></tr> <tr><td>6</td><td>6</td></tr> <tr><td>7</td><td>7</td></tr> <tr><td>8</td><td>8</td></tr> <tr><td>9</td><td>9</td></tr> <tr><td>10</td><td>10 Very Satisfied</td></tr> </table> | 0 | 0 Not Satisfied | 1 | 1 | 2 | 2 | 3 | 3 | 4 | 4 | 5 | 5 | 6 | 6 | 7 | 7 | 8 | 8 | 9 | 9 | 10 | 10 Very Satisfied |
| 0   | 0 Not Satisfied                                                                                  |                                                                                                                                                                                          |                                                                                                                                                                                                                                                                                                                                                                                                                            |   |                 |   |   |   |   |   |   |   |   |   |   |   |   |   |   |   |   |   |   |    |                   |
| 1   | 1                                                                                                |                                                                                                                                                                                          |                                                                                                                                                                                                                                                                                                                                                                                                                            |   |                 |   |   |   |   |   |   |   |   |   |   |   |   |   |   |   |   |   |   |    |                   |
| 2   | 2                                                                                                |                                                                                                                                                                                          |                                                                                                                                                                                                                                                                                                                                                                                                                            |   |                 |   |   |   |   |   |   |   |   |   |   |   |   |   |   |   |   |   |   |    |                   |
| 3   | 3                                                                                                |                                                                                                                                                                                          |                                                                                                                                                                                                                                                                                                                                                                                                                            |   |                 |   |   |   |   |   |   |   |   |   |   |   |   |   |   |   |   |   |   |    |                   |
| 4   | 4                                                                                                |                                                                                                                                                                                          |                                                                                                                                                                                                                                                                                                                                                                                                                            |   |                 |   |   |   |   |   |   |   |   |   |   |   |   |   |   |   |   |   |   |    |                   |
| 5   | 5                                                                                                |                                                                                                                                                                                          |                                                                                                                                                                                                                                                                                                                                                                                                                            |   |                 |   |   |   |   |   |   |   |   |   |   |   |   |   |   |   |   |   |   |    |                   |
| 6   | 6                                                                                                |                                                                                                                                                                                          |                                                                                                                                                                                                                                                                                                                                                                                                                            |   |                 |   |   |   |   |   |   |   |   |   |   |   |   |   |   |   |   |   |   |    |                   |
| 7   | 7                                                                                                |                                                                                                                                                                                          |                                                                                                                                                                                                                                                                                                                                                                                                                            |   |                 |   |   |   |   |   |   |   |   |   |   |   |   |   |   |   |   |   |   |    |                   |
| 8   | 8                                                                                                |                                                                                                                                                                                          |                                                                                                                                                                                                                                                                                                                                                                                                                            |   |                 |   |   |   |   |   |   |   |   |   |   |   |   |   |   |   |   |   |   |    |                   |
| 9   | 9                                                                                                |                                                                                                                                                                                          |                                                                                                                                                                                                                                                                                                                                                                                                                            |   |                 |   |   |   |   |   |   |   |   |   |   |   |   |   |   |   |   |   |   |    |                   |
| 10  | 10 Very Satisfied                                                                                |                                                                                                                                                                                          |                                                                                                                                                                                                                                                                                                                                                                                                                            |   |                 |   |   |   |   |   |   |   |   |   |   |   |   |   |   |   |   |   |   |    |                   |

|     |                                                                                                   |                                                                                                                                                                                                                                                            |                                                                                                                                                                                                                                                                                                                                                                                               |   |                           |   |   |   |   |   |   |   |                    |   |   |   |   |   |   |   |   |   |   |    |    |
|-----|---------------------------------------------------------------------------------------------------|------------------------------------------------------------------------------------------------------------------------------------------------------------------------------------------------------------------------------------------------------------|-----------------------------------------------------------------------------------------------------------------------------------------------------------------------------------------------------------------------------------------------------------------------------------------------------------------------------------------------------------------------------------------------|---|---------------------------|---|---|---|---|---|---|---|--------------------|---|---|---|---|---|---|---|---|---|---|----|----|
| 567 | <p>interest_in_oat_post</p> <p>Show the field ONLY if:<br/>[current_on_oat_post] = '0'</p>        | <p>1. How interested are you in receiving OAT? (0 = not interested at all, 10 = very interested) U: f11_1_ruf, K:f11_1_ky_v2</p>                                                                                                                           | <p>radio (Matrix)</p> <table border="1"> <tr><td>0</td><td>0</td></tr> <tr><td>1</td><td>1</td></tr> <tr><td>2</td><td>2</td></tr> <tr><td>3</td><td>3</td></tr> <tr><td>4</td><td>4</td></tr> <tr><td>5</td><td>5</td></tr> <tr><td>6</td><td>6</td></tr> <tr><td>7</td><td>7</td></tr> <tr><td>8</td><td>8</td></tr> <tr><td>9</td><td>9</td></tr> <tr><td>10</td><td>10</td></tr> </table> | 0 | 0                         | 1 | 1 | 2 | 2 | 3 | 3 | 4 | 4                  | 5 | 5 | 6 | 6 | 7 | 7 | 8 | 8 | 9 | 9 | 10 | 10 |
| 0   | 0                                                                                                 |                                                                                                                                                                                                                                                            |                                                                                                                                                                                                                                                                                                                                                                                               |   |                           |   |   |   |   |   |   |   |                    |   |   |   |   |   |   |   |   |   |   |    |    |
| 1   | 1                                                                                                 |                                                                                                                                                                                                                                                            |                                                                                                                                                                                                                                                                                                                                                                                               |   |                           |   |   |   |   |   |   |   |                    |   |   |   |   |   |   |   |   |   |   |    |    |
| 2   | 2                                                                                                 |                                                                                                                                                                                                                                                            |                                                                                                                                                                                                                                                                                                                                                                                               |   |                           |   |   |   |   |   |   |   |                    |   |   |   |   |   |   |   |   |   |   |    |    |
| 3   | 3                                                                                                 |                                                                                                                                                                                                                                                            |                                                                                                                                                                                                                                                                                                                                                                                               |   |                           |   |   |   |   |   |   |   |                    |   |   |   |   |   |   |   |   |   |   |    |    |
| 4   | 4                                                                                                 |                                                                                                                                                                                                                                                            |                                                                                                                                                                                                                                                                                                                                                                                               |   |                           |   |   |   |   |   |   |   |                    |   |   |   |   |   |   |   |   |   |   |    |    |
| 5   | 5                                                                                                 |                                                                                                                                                                                                                                                            |                                                                                                                                                                                                                                                                                                                                                                                               |   |                           |   |   |   |   |   |   |   |                    |   |   |   |   |   |   |   |   |   |   |    |    |
| 6   | 6                                                                                                 |                                                                                                                                                                                                                                                            |                                                                                                                                                                                                                                                                                                                                                                                               |   |                           |   |   |   |   |   |   |   |                    |   |   |   |   |   |   |   |   |   |   |    |    |
| 7   | 7                                                                                                 |                                                                                                                                                                                                                                                            |                                                                                                                                                                                                                                                                                                                                                                                               |   |                           |   |   |   |   |   |   |   |                    |   |   |   |   |   |   |   |   |   |   |    |    |
| 8   | 8                                                                                                 |                                                                                                                                                                                                                                                            |                                                                                                                                                                                                                                                                                                                                                                                               |   |                           |   |   |   |   |   |   |   |                    |   |   |   |   |   |   |   |   |   |   |    |    |
| 9   | 9                                                                                                 |                                                                                                                                                                                                                                                            |                                                                                                                                                                                                                                                                                                                                                                                               |   |                           |   |   |   |   |   |   |   |                    |   |   |   |   |   |   |   |   |   |   |    |    |
| 10  | 10                                                                                                |                                                                                                                                                                                                                                                            |                                                                                                                                                                                                                                                                                                                                                                                               |   |                           |   |   |   |   |   |   |   |                    |   |   |   |   |   |   |   |   |   |   |    |    |
| 568 | <p>difficulty_start_oat_post</p> <p>Show the field ONLY if:<br/>[current_on_oat_post] = '0'</p>   | <p>2. You said you were interested in receiving OAT. How do difficult do you think it would be for you to start treatment? (0 = not difficult at all, 10 = very difficult) U: f11_2_ruf K:f11_2_ky_v2</p>                                                  | <p>radio (Matrix)</p> <table border="1"> <tr><td>0</td><td>0</td></tr> <tr><td>1</td><td>1</td></tr> <tr><td>2</td><td>2</td></tr> <tr><td>3</td><td>3</td></tr> <tr><td>4</td><td>4</td></tr> <tr><td>5</td><td>5</td></tr> <tr><td>6</td><td>6</td></tr> <tr><td>7</td><td>7</td></tr> <tr><td>8</td><td>8</td></tr> <tr><td>9</td><td>9</td></tr> <tr><td>10</td><td>10</td></tr> </table> | 0 | 0                         | 1 | 1 | 2 | 2 | 3 | 3 | 4 | 4                  | 5 | 5 | 6 | 6 | 7 | 7 | 8 | 8 | 9 | 9 | 10 | 10 |
| 0   | 0                                                                                                 |                                                                                                                                                                                                                                                            |                                                                                                                                                                                                                                                                                                                                                                                               |   |                           |   |   |   |   |   |   |   |                    |   |   |   |   |   |   |   |   |   |   |    |    |
| 1   | 1                                                                                                 |                                                                                                                                                                                                                                                            |                                                                                                                                                                                                                                                                                                                                                                                               |   |                           |   |   |   |   |   |   |   |                    |   |   |   |   |   |   |   |   |   |   |    |    |
| 2   | 2                                                                                                 |                                                                                                                                                                                                                                                            |                                                                                                                                                                                                                                                                                                                                                                                               |   |                           |   |   |   |   |   |   |   |                    |   |   |   |   |   |   |   |   |   |   |    |    |
| 3   | 3                                                                                                 |                                                                                                                                                                                                                                                            |                                                                                                                                                                                                                                                                                                                                                                                               |   |                           |   |   |   |   |   |   |   |                    |   |   |   |   |   |   |   |   |   |   |    |    |
| 4   | 4                                                                                                 |                                                                                                                                                                                                                                                            |                                                                                                                                                                                                                                                                                                                                                                                               |   |                           |   |   |   |   |   |   |   |                    |   |   |   |   |   |   |   |   |   |   |    |    |
| 5   | 5                                                                                                 |                                                                                                                                                                                                                                                            |                                                                                                                                                                                                                                                                                                                                                                                               |   |                           |   |   |   |   |   |   |   |                    |   |   |   |   |   |   |   |   |   |   |    |    |
| 6   | 6                                                                                                 |                                                                                                                                                                                                                                                            |                                                                                                                                                                                                                                                                                                                                                                                               |   |                           |   |   |   |   |   |   |   |                    |   |   |   |   |   |   |   |   |   |   |    |    |
| 7   | 7                                                                                                 |                                                                                                                                                                                                                                                            |                                                                                                                                                                                                                                                                                                                                                                                               |   |                           |   |   |   |   |   |   |   |                    |   |   |   |   |   |   |   |   |   |   |    |    |
| 8   | 8                                                                                                 |                                                                                                                                                                                                                                                            |                                                                                                                                                                                                                                                                                                                                                                                               |   |                           |   |   |   |   |   |   |   |                    |   |   |   |   |   |   |   |   |   |   |    |    |
| 9   | 9                                                                                                 |                                                                                                                                                                                                                                                            |                                                                                                                                                                                                                                                                                                                                                                                               |   |                           |   |   |   |   |   |   |   |                    |   |   |   |   |   |   |   |   |   |   |    |    |
| 10  | 10                                                                                                |                                                                                                                                                                                                                                                            |                                                                                                                                                                                                                                                                                                                                                                                               |   |                           |   |   |   |   |   |   |   |                    |   |   |   |   |   |   |   |   |   |   |    |    |
| 569 | <p>importance_receive_oat_post</p> <p>Show the field ONLY if:<br/>[current_on_oat_post] = '0'</p> | <p>3. How important is it for you to receive OAT? (0 = not important at all, 10 = very important) U: f11_3_ruf K:f11_3_ky_v2</p>                                                                                                                           | <p>radio (Matrix)</p> <table border="1"> <tr><td>0</td><td>0</td></tr> <tr><td>1</td><td>1</td></tr> <tr><td>2</td><td>2</td></tr> <tr><td>3</td><td>3</td></tr> <tr><td>4</td><td>4</td></tr> <tr><td>5</td><td>5</td></tr> <tr><td>6</td><td>6</td></tr> <tr><td>7</td><td>7</td></tr> <tr><td>8</td><td>8</td></tr> <tr><td>9</td><td>9</td></tr> <tr><td>10</td><td>10</td></tr> </table> | 0 | 0                         | 1 | 1 | 2 | 2 | 3 | 3 | 4 | 4                  | 5 | 5 | 6 | 6 | 7 | 7 | 8 | 8 | 9 | 9 | 10 | 10 |
| 0   | 0                                                                                                 |                                                                                                                                                                                                                                                            |                                                                                                                                                                                                                                                                                                                                                                                               |   |                           |   |   |   |   |   |   |   |                    |   |   |   |   |   |   |   |   |   |   |    |    |
| 1   | 1                                                                                                 |                                                                                                                                                                                                                                                            |                                                                                                                                                                                                                                                                                                                                                                                               |   |                           |   |   |   |   |   |   |   |                    |   |   |   |   |   |   |   |   |   |   |    |    |
| 2   | 2                                                                                                 |                                                                                                                                                                                                                                                            |                                                                                                                                                                                                                                                                                                                                                                                               |   |                           |   |   |   |   |   |   |   |                    |   |   |   |   |   |   |   |   |   |   |    |    |
| 3   | 3                                                                                                 |                                                                                                                                                                                                                                                            |                                                                                                                                                                                                                                                                                                                                                                                               |   |                           |   |   |   |   |   |   |   |                    |   |   |   |   |   |   |   |   |   |   |    |    |
| 4   | 4                                                                                                 |                                                                                                                                                                                                                                                            |                                                                                                                                                                                                                                                                                                                                                                                               |   |                           |   |   |   |   |   |   |   |                    |   |   |   |   |   |   |   |   |   |   |    |    |
| 5   | 5                                                                                                 |                                                                                                                                                                                                                                                            |                                                                                                                                                                                                                                                                                                                                                                                               |   |                           |   |   |   |   |   |   |   |                    |   |   |   |   |   |   |   |   |   |   |    |    |
| 6   | 6                                                                                                 |                                                                                                                                                                                                                                                            |                                                                                                                                                                                                                                                                                                                                                                                               |   |                           |   |   |   |   |   |   |   |                    |   |   |   |   |   |   |   |   |   |   |    |    |
| 7   | 7                                                                                                 |                                                                                                                                                                                                                                                            |                                                                                                                                                                                                                                                                                                                                                                                               |   |                           |   |   |   |   |   |   |   |                    |   |   |   |   |   |   |   |   |   |   |    |    |
| 8   | 8                                                                                                 |                                                                                                                                                                                                                                                            |                                                                                                                                                                                                                                                                                                                                                                                               |   |                           |   |   |   |   |   |   |   |                    |   |   |   |   |   |   |   |   |   |   |    |    |
| 9   | 9                                                                                                 |                                                                                                                                                                                                                                                            |                                                                                                                                                                                                                                                                                                                                                                                               |   |                           |   |   |   |   |   |   |   |                    |   |   |   |   |   |   |   |   |   |   |    |    |
| 10  | 10                                                                                                |                                                                                                                                                                                                                                                            |                                                                                                                                                                                                                                                                                                                                                                                               |   |                           |   |   |   |   |   |   |   |                    |   |   |   |   |   |   |   |   |   |   |    |    |
| 570 | <p>so_instructionsf</p> <p>Show the field ONLY if:<br/>[current_on_oat_post] = '0'</p>            | <p>Please read the following statements carefully. Each one describes a way that you might (or might not) feel about your drug use. For each statement, select one number from 1 to 5, to indicate how much you agree or disagree with it right now. P</p> | <p>descriptive</p>                                                                                                                                                                                                                                                                                                                                                                            |   |                           |   |   |   |   |   |   |   |                    |   |   |   |   |   |   |   |   |   |   |    |    |
| 571 | <p>so1_post</p> <p>Show the field ONLY if:<br/>[current_on_oat_post] = '0'</p>                    | <p>Section Header: <i>Motivation Socrates 8D</i></p> <p>1. I really want to make changes in my use of drugs. U: So1_ruf, K: so1_v2</p>                                                                                                                     | <p>radio (Matrix)</p> <table border="1"> <tr><td>1</td><td>1 Absolutely do not agree</td></tr> <tr><td>2</td><td>2</td></tr> <tr><td>3</td><td>3</td></tr> <tr><td>4</td><td>4</td></tr> <tr><td>5</td><td>5 Absolutely agree</td></tr> </table>                                                                                                                                              | 1 | 1 Absolutely do not agree | 2 | 2 | 3 | 3 | 4 | 4 | 5 | 5 Absolutely agree |   |   |   |   |   |   |   |   |   |   |    |    |
| 1   | 1 Absolutely do not agree                                                                         |                                                                                                                                                                                                                                                            |                                                                                                                                                                                                                                                                                                                                                                                               |   |                           |   |   |   |   |   |   |   |                    |   |   |   |   |   |   |   |   |   |   |    |    |
| 2   | 2                                                                                                 |                                                                                                                                                                                                                                                            |                                                                                                                                                                                                                                                                                                                                                                                               |   |                           |   |   |   |   |   |   |   |                    |   |   |   |   |   |   |   |   |   |   |    |    |
| 3   | 3                                                                                                 |                                                                                                                                                                                                                                                            |                                                                                                                                                                                                                                                                                                                                                                                               |   |                           |   |   |   |   |   |   |   |                    |   |   |   |   |   |   |   |   |   |   |    |    |
| 4   | 4                                                                                                 |                                                                                                                                                                                                                                                            |                                                                                                                                                                                                                                                                                                                                                                                               |   |                           |   |   |   |   |   |   |   |                    |   |   |   |   |   |   |   |   |   |   |    |    |
| 5   | 5 Absolutely agree                                                                                |                                                                                                                                                                                                                                                            |                                                                                                                                                                                                                                                                                                                                                                                               |   |                           |   |   |   |   |   |   |   |                    |   |   |   |   |   |   |   |   |   |   |    |    |

|     |                                                                    |                                                                                                                                    |                                                                                            |
|-----|--------------------------------------------------------------------|------------------------------------------------------------------------------------------------------------------------------------|--------------------------------------------------------------------------------------------|
| 572 | so2_post<br>Show the field ONLY if:<br>[current_on_oat_post] = '0' | 2. Sometimes I wonder if I am an addict. U:so2ruf, , K: so2_v2                                                                     | radio (Matrix)<br>1 1 Absolutely do not agree<br>2 2<br>3 3<br>4 4<br>5 5 Absolutely agree |
| 573 | so3_post<br>Show the field ONLY if:<br>[current_on_oat_post] = '0' | 3. If I don't change my drug use soon, my problems are going to get worse. U:so3ruf, K: so3_v2                                     | radio (Matrix)<br>1 1 Absolutely do not agree<br>2 2<br>3 3<br>4 4<br>5 5 Absolutely agree |
| 574 | so4_post<br>Show the field ONLY if:<br>[current_on_oat_post] = '0' | 4. I have already started making some changes in my use of drugs. U:so4ruf, , K: so4_v2                                            | radio (Matrix)<br>1 1 Absolutely do not agree<br>2 2<br>3 3<br>4 4<br>5 5 Absolutely agree |
| 575 | so5_post<br>Show the field ONLY if:<br>[current_on_oat_post] = '0' | 5. I was using drugs too much at one time, but I've managed to change that. U:so5ruf, , K: so5_v2                                  | radio (Matrix)<br>1 1 Absolutely do not agree<br>2 2<br>3 3<br>4 4<br>5 5 Absolutely agree |
| 576 | so6_post<br>Show the field ONLY if:<br>[current_on_oat_post] = '0' | 6. Sometimes I wonder if my drug use is hurting other people. U:so6ruf, K: so6_v2                                                  | radio (Matrix)<br>1 1 Absolutely do not agree<br>2 2<br>3 3<br>4 4<br>5 5 Absolutely agree |
| 577 | so7_post<br>Show the field ONLY if:<br>[current_on_oat_post] = '0' | 7. I have a drug problem. U:so7ruf, K: so7_v2                                                                                      | radio (Matrix)<br>1 1 Absolutely do not agree<br>2 2<br>3 3<br>4 4<br>5 5 Absolutely agree |
| 578 | so8_post<br>Show the field ONLY if:<br>[current_on_oat_post] = '0' | 8. I'm not just thinking about changing my drug use, I'm already doing something about it. U:so8ruf, K: so8_v2                     | radio (Matrix)<br>1 1 Absolutely do not agree<br>2 2<br>3 3<br>4 4<br>5 5 Absolutely agree |
| 579 | so9_post<br>Show the field ONLY if:<br>[current_on_oat_post] = '0' | 9. I have already changed my drug use, and I am looking for ways to keep from slipping back to my old pattern. U:so9ruf, K: so9_v2 | radio (Matrix)<br>1 1 Absolutely do not agree<br>2 2<br>3 3<br>4 4<br>5 5 Absolutely agree |

|     |                                                                     |                                                                                                       |                                                                                            |
|-----|---------------------------------------------------------------------|-------------------------------------------------------------------------------------------------------|--------------------------------------------------------------------------------------------|
| 580 | so10_post<br>Show the field ONLY if:<br>[current_on_oat_post] = '0' | 10. I have serious problems with drugs. U:so10ruf, K: so10_v2                                         | radio (Matrix)<br>1 1 Absolutely do not agree<br>2 2<br>3 3<br>4 4<br>5 5 Absolutely agree |
| 581 | so11_post<br>Show the field ONLY if:<br>[current_on_oat_post] = '0' | 11. Sometimes I wonder if I am in control of my drug use. U:so11ruf, K: so11_v2                       | radio (Matrix)<br>1 1 Absolutely do not agree<br>2 2<br>3 3<br>4 4<br>5 5 Absolutely agree |
| 582 | so12_post<br>Show the field ONLY if:<br>[current_on_oat_post] = '0' | 12. My drug use is causing a lot of harm. U:so12ruf, K: so12_v2                                       | radio (Matrix)<br>1 1 Absolutely do not agree<br>2 2<br>3 3<br>4 4<br>5 5 Absolutely agree |
| 583 | so13_post<br>Show the field ONLY if:<br>[current_on_oat_post] = '0' | 13. I am actively doing things now to cut down or stop my use of drugs. U:so13ruf, K: so13_v2         | radio (Matrix)<br>1 1 Absolutely do not agree<br>2 2<br>3 3<br>4 4<br>5 5 Absolutely agree |
| 584 | so14_post<br>Show the field ONLY if:<br>[current_on_oat_post] = '0' | 14. I want help to keep from going back to the drug problems that I had before. U:so14ruf, K: so14_v2 | radio (Matrix)<br>1 1 Absolutely do not agree<br>2 2<br>3 3<br>4 4<br>5 5 Absolutely agree |
| 585 | so15_post<br>Show the field ONLY if:<br>[current_on_oat_post] = '0' | 15. I know that I have a drug problem. U:so15ruf, K: so15_v2                                          | radio (Matrix)<br>1 1 Absolutely do not agree<br>2 2<br>3 3<br>4 4<br>5 5 Absolutely agree |
| 586 | so16_post<br>Show the field ONLY if:<br>[current_on_oat_post] = '0' | 16. There are times when I wonder if I use drugs too much. U:so16ruf, K: so16_v2                      | radio (Matrix)<br>1 1 Absolutely do not agree<br>2 2<br>3 3<br>4 4<br>5 5 Absolutely agree |
| 587 | so17_post<br>Show the field ONLY if:<br>[current_on_oat_post] = '0' | 17. I am a drug addict. U:so17ruf, K: so17_v2                                                         | radio (Matrix)<br>1 1 Absolutely do not agree<br>2 2<br>3 3<br>4 4<br>5 5 Absolutely agree |



|     |                                                                     |                                                                                                                                           |                                                                                            |
|-----|---------------------------------------------------------------------|-------------------------------------------------------------------------------------------------------------------------------------------|--------------------------------------------------------------------------------------------|
| 588 | so18_post<br>Show the field ONLY if:<br>[current_on_oat_post] = '0' | 18. I am working hard to change my drug use. U:so18ruf, K: so18_v2                                                                        | radio (Matrix)<br>1 1 Absolutely do not agree<br>2 2<br>3 3<br>4 4<br>5 5 Absolutely agree |
| 589 | so19_post<br>Show the field ONLY if:<br>[current_on_oat_post] = '0' | 19. I have made some changes in my drug use, and I want some help to keep from going back to the way I used before. U:so19ruf, K: so19_v2 | radio (Matrix)<br>1 1 Absolutely do not agree<br>2 2<br>3 3<br>4 4<br>5 5 Absolutely agree |
| 590 | form_10_and_11_after_compl<br>ete                                   | Section Header: <i>Form Status</i><br>Complete?                                                                                           | dropdown<br>0 Incomplete<br>1 Unverified<br>2 Complete                                     |

Instrument: **Opioid Test Results** (opiod\_test\_results)

[^ Collapse](#)

|     |                                                                             |                                                                                    |                                            |
|-----|-----------------------------------------------------------------------------|------------------------------------------------------------------------------------|--------------------------------------------|
| 591 | toxtestdate<br>Show the field ONLY if:<br>[screen_arm_1][country] = '3'     | Date of Test U, K:toxtestdate_ru                                                   | text (date_mdy)                            |
| 592 | toxtest_intid<br>Show the field ONLY if:<br>[screen_arm_1][country] = '3'   | Interviewer code U, K:toxtest_intid_ru                                             | text (number)                              |
| 593 | toxtestdone<br>Show the field ONLY if:<br>[screen_arm_1][country] = '3'     | Was the test for opioids performed? U, K:toxtestdone_ru                            | radio<br>1 Yes<br>0 No                     |
| 594 | toxtest_notdone<br>Show the field ONLY if:<br>[screen_arm_1][country] = '3' | If not performed, then why? (write reason for non-consent)U, K: toxtest_notdone_ru | text                                       |
| 595 | toxttest_result<br>Show the field ONLY if:<br>[screen_arm_1][country] = '3' | Result: U, K: toxttest_result_ru                                                   | radio<br>1 Positive<br>0 Negative          |
| 596 | coc                                                                         | Cocaine                                                                            | radio (Matrix)<br>1 Positive<br>0 Negative |
| 597 | tca                                                                         | tca (????????????????????????????????)                                             | radio (Matrix)<br>1 Positive<br>0 Negative |
| 598 | amp                                                                         | amphetamines                                                                       | radio (Matrix)<br>1 Positive<br>0 Negative |
| 599 | mamp                                                                        | methamphetamines                                                                   | radio (Matrix)<br>1 Positive<br>0 Negative |
| 600 | thc                                                                         | Marijuana                                                                          | radio (Matrix)<br>1 Positive<br>0 Negative |

|     |                              |                                                 |                                                        |
|-----|------------------------------|-------------------------------------------------|--------------------------------------------------------|
| 601 | mtd                          | methadone                                       | radio (Matrix)<br>1 Positive<br>0 Negative             |
| 602 | opi                          | opiates                                         | radio (Matrix)<br>1 Positive<br>0 Negative             |
| 603 | pcp                          | phencyclides (PCP)                              | radio (Matrix)<br>1 Positive<br>0 Negative             |
| 604 | bar                          | barbituates                                     | radio (Matrix)<br>1 Positive<br>0 Negative             |
| 605 | bzo                          | benzodiazepines                                 | radio (Matrix)<br>1 Positive<br>0 Negative             |
| 606 | opioid_test_results_complete | Section Header: <i>Form Status</i><br>Complete? | dropdown<br>0 Incomplete<br>1 Unverified<br>2 Complete |

Instrument: **Survey Completion Method** (survey\_completion\_method) ^ Collapse

|     |                                   |                                                 |                                                                                                                                                                                                                 |
|-----|-----------------------------------|-------------------------------------------------|-----------------------------------------------------------------------------------------------------------------------------------------------------------------------------------------------------------------|
| 607 | completion_mthd                   | How was the survey completed? U, K:compl_ru     | radio<br>1 Participant did the survey by themselves without RA assistance<br>2 Occasional assistance from the RA<br>3 RA had to administer most of the interview<br>4 RA had to administer the entire interview |
| 608 | survey_completion_method_complete | Section Header: <i>Form Status</i><br>Complete? | dropdown<br>0 Incomplete<br>1 Unverified<br>2 Complete                                                                                                                                                          |

Instrument: **Intervention Completion** (intervention\_completion) ^ Collapse

|     |                                  |                                                         |                                                                                                                                                                                                                       |
|-----|----------------------------------|---------------------------------------------------------|-----------------------------------------------------------------------------------------------------------------------------------------------------------------------------------------------------------------------|
| 609 | intervention                     | Did you perform the intervention with this participant? | radio<br>1 Yes, I performed and completed the full intervention<br>2 Yes, I performed a partial intervention, it was not complete<br>0 No, I did not get to perform the intervention<br><br>Field Annotation: @HIDDEN |
| 610 | no_interview                     | Why was the intervention not completed?                 | notes<br>Field Annotation: @HIDDEN                                                                                                                                                                                    |
| 611 | intervention_completion_complete | Section Header: <i>Form Status</i><br>Complete?         | dropdown<br>0 Incomplete<br>1 Unverified<br>2 Complete                                                                                                                                                                |

Instrument: **Ost Use** (ost\_use) ^ Collapse

|     |          |                                                           |             |
|-----|----------|-----------------------------------------------------------|-------------|
| 612 | enrolled | This participant was enrolled on [daya_arm_1][oat_intdt]. | descriptive |
|-----|----------|-----------------------------------------------------------|-------------|

|     |                                                                        |                                                           |                                                                                                                                                                                                                                                                                                               |   |                                 |   |                                                        |   |                   |   |               |   |       |
|-----|------------------------------------------------------------------------|-----------------------------------------------------------|---------------------------------------------------------------------------------------------------------------------------------------------------------------------------------------------------------------------------------------------------------------------------------------------------------------|---|---------------------------------|---|--------------------------------------------------------|---|-------------------|---|---------------|---|-------|
| 613 | start_ost                                                              | Did this person start OST after the date above?           | yesno, Required<br><table border="1"> <tr><td>1</td><td>Yes</td></tr> <tr><td>0</td><td>No</td></tr> </table>                                                                                                                                                                                                 | 1 | Yes                             | 0 | No                                                     |   |                   |   |               |   |       |
| 1   | Yes                                                                    |                                                           |                                                                                                                                                                                                                                                                                                               |   |                                 |   |                                                        |   |                   |   |               |   |       |
| 0   | No                                                                     |                                                           |                                                                                                                                                                                                                                                                                                               |   |                                 |   |                                                        |   |                   |   |               |   |       |
| 614 | start_ost_date                                                         | OST start date                                            | text (date_ymd)                                                                                                                                                                                                                                                                                               |   |                                 |   |                                                        |   |                   |   |               |   |       |
| 615 | end_ost_date                                                           | OST end date                                              | text (date_mdy)                                                                                                                                                                                                                                                                                               |   |                                 |   |                                                        |   |                   |   |               |   |       |
| 616 | end_ost_reason                                                         | Why did the participant discontinue OST?                  | radio<br><table border="1"> <tr><td>1</td><td>Planned completion of treatment</td></tr> <tr><td>2</td><td>Violation of OST patient-provider agreement conditions</td></tr> <tr><td>3</td><td>Voluntary refusal</td></tr> <tr><td>4</td><td>Other reasons</td></tr> <tr><td>5</td><td>Death</td></tr> </table> | 1 | Planned completion of treatment | 2 | Violation of OST patient-provider agreement conditions | 3 | Voluntary refusal | 4 | Other reasons | 5 | Death |
| 1   | Planned completion of treatment                                        |                                                           |                                                                                                                                                                                                                                                                                                               |   |                                 |   |                                                        |   |                   |   |               |   |       |
| 2   | Violation of OST patient-provider agreement conditions                 |                                                           |                                                                                                                                                                                                                                                                                                               |   |                                 |   |                                                        |   |                   |   |               |   |       |
| 3   | Voluntary refusal                                                      |                                                           |                                                                                                                                                                                                                                                                                                               |   |                                 |   |                                                        |   |                   |   |               |   |       |
| 4   | Other reasons                                                          |                                                           |                                                                                                                                                                                                                                                                                                               |   |                                 |   |                                                        |   |                   |   |               |   |       |
| 5   | Death                                                                  |                                                           |                                                                                                                                                                                                                                                                                                               |   |                                 |   |                                                        |   |                   |   |               |   |       |
| 617 | end_ost_reason_other<br>Show the field ONLY if: [end_ost_reason] = '4' | Other:                                                    | text                                                                                                                                                                                                                                                                                                          |   |                                 |   |                                                        |   |                   |   |               |   |       |
| 618 | ost_use_comments                                                       | Comments                                                  | notes                                                                                                                                                                                                                                                                                                         |   |                                 |   |                                                        |   |                   |   |               |   |       |
| 619 | start_ost_date_2                                                       | Section Header:<br>OST start date 2                       | text (date_ymd)                                                                                                                                                                                                                                                                                               |   |                                 |   |                                                        |   |                   |   |               |   |       |
| 620 | end_ost_date_2                                                         | OST end date 2                                            | text (date_mdy)                                                                                                                                                                                                                                                                                               |   |                                 |   |                                                        |   |                   |   |               |   |       |
| 621 | end_ost_reason_2                                                       | Why did the participant discontinue OST this second time? | radio<br><table border="1"> <tr><td>1</td><td>Planned completion of treatment</td></tr> <tr><td>2</td><td>Violation of OST patient-provider agreement conditions</td></tr> <tr><td>3</td><td>Voluntary refusal</td></tr> <tr><td>4</td><td>Other reasons</td></tr> <tr><td>5</td><td>Death</td></tr> </table> | 1 | Planned completion of treatment | 2 | Violation of OST patient-provider agreement conditions | 3 | Voluntary refusal | 4 | Other reasons | 5 | Death |
| 1   | Planned completion of treatment                                        |                                                           |                                                                                                                                                                                                                                                                                                               |   |                                 |   |                                                        |   |                   |   |               |   |       |
| 2   | Violation of OST patient-provider agreement conditions                 |                                                           |                                                                                                                                                                                                                                                                                                               |   |                                 |   |                                                        |   |                   |   |               |   |       |
| 3   | Voluntary refusal                                                      |                                                           |                                                                                                                                                                                                                                                                                                               |   |                                 |   |                                                        |   |                   |   |               |   |       |
| 4   | Other reasons                                                          |                                                           |                                                                                                                                                                                                                                                                                                               |   |                                 |   |                                                        |   |                   |   |               |   |       |
| 5   | Death                                                                  |                                                           |                                                                                                                                                                                                                                                                                                               |   |                                 |   |                                                        |   |                   |   |               |   |       |
| 622 | ost_use_comments_2                                                     | Comments                                                  | notes                                                                                                                                                                                                                                                                                                         |   |                                 |   |                                                        |   |                   |   |               |   |       |
| 623 | ost_use_complete                                                       | Section Header: <i>Form Status</i><br>Complete?           | dropdown<br><table border="1"> <tr><td>0</td><td>Incomplete</td></tr> <tr><td>1</td><td>Unverified</td></tr> <tr><td>2</td><td>Complete</td></tr> </table>                                                                                                                                                    | 0 | Incomplete                      | 1 | Unverified                                             | 2 | Complete          |   |               |   |       |
| 0   | Incomplete                                                             |                                                           |                                                                                                                                                                                                                                                                                                               |   |                                 |   |                                                        |   |                   |   |               |   |       |
| 1   | Unverified                                                             |                                                           |                                                                                                                                                                                                                                                                                                               |   |                                 |   |                                                        |   |                   |   |               |   |       |
| 2   | Complete                                                               |                                                           |                                                                                                                                                                                                                                                                                                               |   |                                 |   |                                                        |   |                   |   |               |   |       |

Instrument: **Form 5** (form\_5)

[^ Collapse](#)

|     |           |                                                                                   |                                                                                                              |   |     |   |    |
|-----|-----------|-----------------------------------------------------------------------------------|--------------------------------------------------------------------------------------------------------------|---|-----|---|----|
| 624 | f5_intvdt | Interview Date<br>U: f5_intvdt_ru                                                 | text (date_mdy)                                                                                              |   |     |   |    |
| 625 | f5_intid  | Interviewer ID                                                                    | text                                                                                                         |   |     |   |    |
| 626 | f5_1      | Section Header: <i>Overall opinion on research</i><br>Overall opinion on research | radio (Matrix)<br><table border="1"> <tr><td>1</td><td>Yes</td></tr> <tr><td>0</td><td>No</td></tr> </table> | 1 | Yes | 0 | No |
| 1   | Yes       |                                                                                   |                                                                                                              |   |     |   |    |
| 0   | No        |                                                                                   |                                                                                                              |   |     |   |    |
| 627 | f5_2      | Views on the organization carrying out the research                               | radio (Matrix)<br><table border="1"> <tr><td>1</td><td>Yes</td></tr> <tr><td>0</td><td>No</td></tr> </table> | 1 | Yes | 0 | No |
| 1   | Yes       |                                                                                   |                                                                                                              |   |     |   |    |
| 0   | No        |                                                                                   |                                                                                                              |   |     |   |    |
| 628 | f5_3      | The topic of the study                                                            | radio (Matrix)<br><table border="1"> <tr><td>1</td><td>Yes</td></tr> <tr><td>0</td><td>No</td></tr> </table> | 1 | Yes | 0 | No |
| 1   | Yes       |                                                                                   |                                                                                                              |   |     |   |    |
| 0   | No        |                                                                                   |                                                                                                              |   |     |   |    |
| 629 | f5_4      | Social isolation                                                                  | radio (Matrix)<br><table border="1"> <tr><td>1</td><td>Yes</td></tr> <tr><td>0</td><td>No</td></tr> </table> | 1 | Yes | 0 | No |
| 1   | Yes       |                                                                                   |                                                                                                              |   |     |   |    |
| 0   | No        |                                                                                   |                                                                                                              |   |     |   |    |

|     |       |                                                                                                             |                                                                                   |
|-----|-------|-------------------------------------------------------------------------------------------------------------|-----------------------------------------------------------------------------------|
| 630 | f5_5  | Section Header: <i>Research Procedures Quality of study instruments:</i><br>Content of the interviews       | radio (Matrix)<br><input type="checkbox"/> 1 Yes<br><input type="checkbox"/> 0 No |
| 631 | f5_6  | The way the questions were asked                                                                            | radio (Matrix)<br><input type="checkbox"/> 1 Yes<br><input type="checkbox"/> 0 No |
| 632 | f5_7  | The length of the interview                                                                                 | radio (Matrix)<br><input type="checkbox"/> 1 Yes<br><input type="checkbox"/> 0 No |
| 633 | f5_8  | Work with computers                                                                                         | radio (Matrix)<br><input type="checkbox"/> 1 Yes<br><input type="checkbox"/> 0 No |
| 634 | f5_9  | The way I was treated                                                                                       | radio (Matrix)<br><input type="checkbox"/> 1 Yes<br><input type="checkbox"/> 0 No |
| 635 | f5_10 | Section Header: <i>Research procedures: Interview procedures:</i><br>Study methodology                      | radio (Matrix)<br><input type="checkbox"/> 1 Yes<br><input type="checkbox"/> 0 No |
| 636 | f5_11 | Follow-up procedures                                                                                        | radio (Matrix)<br><input type="checkbox"/> 1 Yes<br><input type="checkbox"/> 0 No |
| 637 | f5_12 | Repeated attempts to convince me to continue the study                                                      | radio (Matrix)<br><input type="checkbox"/> 1 Yes<br><input type="checkbox"/> 0 No |
| 638 | f5_13 | Professional characteristics of the interviewer                                                             | radio (Matrix)<br><input type="checkbox"/> 1 Yes<br><input type="checkbox"/> 0 No |
| 639 | f5_14 | The reward for study participation                                                                          | radio (Matrix)<br><input type="checkbox"/> 1 Yes<br><input type="checkbox"/> 0 No |
| 640 | f5_15 | Ситуация опроса/интервью на уровне межличностного общения (интервьюер - респондент)                         | yesno<br><input type="checkbox"/> 1 Yes<br><input type="checkbox"/> 0 No          |
| 641 | f5_16 | Section Header: <i>Individual, Psychological</i><br>A feeling of insecurity when talking to the interviewer | radio (Matrix)<br><input type="checkbox"/> 1 Yes<br><input type="checkbox"/> 0 No |
| 642 | f5_17 | Fear                                                                                                        | radio (Matrix)<br><input type="checkbox"/> 1 Yes<br><input type="checkbox"/> 0 No |
| 643 | f5_18 | Unsure that information will be kept confidential                                                           | radio (Matrix)<br><input type="checkbox"/> 1 Yes<br><input type="checkbox"/> 0 No |
| 644 | f5_19 | Other social and personal problems                                                                          | radio (Matrix)<br><input type="checkbox"/> 1 Yes<br><input type="checkbox"/> 0 No |
| 645 | f5_20 | Doesn't trust interviewer                                                                                   | radio (Matrix)<br><input type="checkbox"/> 1 Yes<br><input type="checkbox"/> 0 No |

|     |                 |                                                                                                                |                                                        |
|-----|-----------------|----------------------------------------------------------------------------------------------------------------|--------------------------------------------------------|
| 646 | f5_21           | Section Header: <i>Individual Social/demographic characteristics of the interviewer/participant:</i><br>Gender | radio (Matrix)<br>1 Yes<br>0 No                        |
| 647 | f5_22           | Age                                                                                                            | radio (Matrix)<br>1 Yes<br>0 No                        |
| 648 | f5_23           | Language barriers                                                                                              | radio (Matrix)<br>1 Yes<br>0 No                        |
| 649 | f5_24           | Section Header: <i>Individual: Other</i><br>Didn't feel well                                                   | radio (Matrix)<br>1 Yes<br>0 No                        |
| 650 | f5_25           | Transfer to another facility for treatment                                                                     | radio (Matrix)<br>1 Yes<br>0 No                        |
| 651 | f5_comments     | Comments/Reason for Leaving Study                                                                              | notes                                                  |
| 652 | form_5_complete | Section Header: <i>Form Status</i><br>Complete?                                                                | dropdown<br>0 Incomplete<br>1 Unverified<br>2 Complete |

Instrument: **Excluded From Study** (excluded\_from\_study)

[^ Collapse](#)

|     |                |                         |                                                                                           |
|-----|----------------|-------------------------|-------------------------------------------------------------------------------------------|
| 653 | event_excluded | Event Excluded(Ky Only) | radio<br>1 Day A<br>2 Day B<br>3 Day C<br>4 Follow-up 1<br>5 Follow-up 2<br>6 Follow-up 3 |
|-----|----------------|-------------------------|-------------------------------------------------------------------------------------------|

|     |                     |                      |                                                                                                                                                                                                                                                                                                                                                                                                  |
|-----|---------------------|----------------------|--------------------------------------------------------------------------------------------------------------------------------------------------------------------------------------------------------------------------------------------------------------------------------------------------------------------------------------------------------------------------------------------------|
| 654 | excluded_from_study | Excluded from study: | radio<br>1 Arrest and detention for more than 6 months<br>2 Intentional misrepresentation of the results of the study (consisted in the program of OAT at the time of screening)<br>3 Death<br>4 Withdrawal of consent to participate in the study<br>6 Not released from prison(K and M only)<br>7 Died from overdose (K M only)<br>8 Returned to prison for another crime(K M only)<br>5 Other |
|-----|---------------------|----------------------|--------------------------------------------------------------------------------------------------------------------------------------------------------------------------------------------------------------------------------------------------------------------------------------------------------------------------------------------------------------------------------------------------|

|     |                |       |      |
|-----|----------------|-------|------|
| 655 | excluded_other | Other | text |
|-----|----------------|-------|------|

|     |                              |                                                 |                                                        |
|-----|------------------------------|-------------------------------------------------|--------------------------------------------------------|
| 656 | excluded_from_study_complete | Section Header: <i>Form Status</i><br>Complete? | dropdown<br>0 Incomplete<br>1 Unverified<br>2 Complete |
|-----|------------------------------|-------------------------------------------------|--------------------------------------------------------|

Instrument: **Index And Partner Linkage** (index\_and\_partner\_linkage)

[^ Collapse](#)

|     |                |                                                                   |      |
|-----|----------------|-------------------------------------------------------------------|------|
| 657 | refer_index_id | Идентификационный МАТЛИНК код Индекса, который направил партнера: | text |
|-----|----------------|-------------------------------------------------------------------|------|

|     |                                                                    |                                                 |                                                        |
|-----|--------------------------------------------------------------------|-------------------------------------------------|--------------------------------------------------------|
| 658 | partner_number<br>Show the field ONLY if:<br>[index_partner] = '2' | Это партнер 1 или 2?                            | radio<br>1 1<br>2 2                                    |
| 659 | partner1_id<br>Show the field ONLY if:<br>[index_partner] = '1'    | Идентификационный МАТЛИНК код Партнера 1:       | text                                                   |
| 660 | partner2_id<br>Show the field ONLY if:<br>[index_partner] = '1'    | Идентификационный МАТЛИНК код Партнера 2:       | text                                                   |
| 661 | index_and_partner_linkage_c<br>omplete                             | Section Header: <i>Form Status</i><br>Complete? | dropdown<br>0 Incomplete<br>1 Unverified<br>2 Complete |
